# Supplementary material for: An alternative splicing signature in human Crohn’s disease
Source: BMC Gastroenterol. 2021 Nov 8;21:420. doi: 10.1186/s12876-021-02001-2 (PMC8573860; doi:10.1186/s12876-021-02001-2)
Supplement: Supplementary file 1 — Additional file 1: Table S1. Table for discovered significant AS events in the 20 CD patients from public dataset [file 12876_2021_2001_MOESM1_ESM.xlsx]

## Sheet: 2980_related_events
event_name	splice_type	p	SRR1813867	SRR1813868	SRR1813869	SRR1813870	SRR1813871	SRR1813872	SRR1813873	SRR1813874	SRR1813875	SRR1813876	SRR1813877	SRR1813878	SRR1813879	SRR1813880	SRR1813881	SRR1813882	SRR1813883	SRR1813884	SRR1813885	SRR1813886	SRR1813887	SRR1813888	SRR1813889	SRR1813890	SRR1813891	SRR1813892	SRR1813893	SRR1813894	SRR1813895	SRR1813896	SRR1813897	SRR1813898	SRR1813899
100101467@uc002kyn.1@uc002kyl.2	ALE	0.0233828	0.42	0.33	0.42	0.65	0.54	0.6	0.63	NA	0.54	0.53	0.64	0.59	0.61	0.5	0.51	0.63	0.62	0.39	0.55	0.55	0.54	0.76	0.68	0.63	0.57	0.74	0.51	0.69	0.59	0.61	0.59	0.66	0.58
10013@uc004dkw.1@uc004dks.1	AFE	0.000964284	0.53	0.48	0.42	0.41	0.46	0.48	0.5	0.58	0.58	0.54	0.53	0.47	0.51	0.46	NA	0.52	0.44	0.49	0.46	0.44	0.54	0.5	0.56	0.57	NA	0.58	0.6	0.57	0.5	0.65	0.55	0.58	NA
10013@uc004dkw.1@uc004dkt.1	AFE	0.0424076	0.49	0.49	0.53	0.45	0.52	0.53	0.47	0.46	0.43	0.56	0.52	0.39	0.46	0.42	NA	0.49	0.56	0.44	0.55	0.44	0.5	0.45	0.55	0.58	NA	0.58	0.45	0.52	0.63	0.52	0.6	0.49	NA
100132406@uc009wkh.1@uc009wjv.1uc009wkq.1	AFE	0.0150312	NA	0.64	0.58	0.65	0.56	0.73	0.54	NA	NA	0.55	0.66	0.72	NA	0.46	NA	0.52	0.65	NA	NA	0.72	NA	0.79	0.67	0.6	NA	0.79	NA	0.77	0.72	0.68	NA	NA	0.67
100170939@uc003jyv.2uc003jyw.2@uc010jmh.1	ALE	0.0318158	NA	NA	NA	0.42	0.73	0.49	NA	NA	0.59	0.53	0.56	NA	NA	NA	NA	NA	0.48	NA	NA	0.52	NA	NA	0.46	0.43	0.52	0.45	NA	0.48	0.41	0.45	NA	NA	NA
10025@uc010drw.1@uc002lqd.1uc002lqe.2uc002lqf.2	AFE	0.0147222	0.51	0.35	0.22	0.54	0.31	0.33	0.21	0.29	0.04	0.03	0.27	NA	0.46	0.61	0.49	0.27	0.04	0.34	0.27	0.04	0.37	0.39	0.32	0.66	0.51	0.31	0.39	0.23	0.61	0.36	0.4	0.7	0.52
10057@uc003fmh.1@uc003fmf.1uc010hxl.1uc003fmg.1	ALE	0.0200694	0.59	0.48	0.32	0.24	0.3	0.32	0.23	0.37	0.36	0.27	0.3	0.4	0.46	0.45	0.54	0.27	0.39	0.39	0.43	0.38	0.18	0.23	0.25	0.31	0.23	0.39	0.29	0.24	0.23	0.29	0.56	0.36	0.34
10057@uc010hxn.1@uc003fmf.1uc010hxl.1uc003fmg.1	ALE	0.0255385	0.64	0.54	0.28	0.22	0.28	0.33	0.22	0.36	0.34	0.28	0.28	0.41	0.44	0.44	0.6	0.26	0.4	0.37	0.4	0.36	0.15	0.21	0.22	0.29	0.23	0.37	0.25	0.23	0.21	0.29	0.53	0.38	0.33
10095@uc003uqd.1@uc003uqc.1	AFE	0.0384349	NA	NA	NA	0.65	0.56	0.46	0.47	NA	0.56	0.52	0.64	0.55	0.52	0.55	0.48	NA	NA	0.59	0.47	NA	NA	0.41	0.56	NA	NA	0.47	NA	0.51	NA	0.42	NA	NA	0.43
10144@uc003hsh.1@uc047.uc003hsf.1	ALE	0.0476175	0.48	0.57	0.51	0.35	0.59	0.27	0.46	0.56	0.52	0.51	0.44	0.46	0.51	0.48	0.51	0.36	0.57	0.48	0.36	0.6	0.43	0.4	0.48	0.46	0.51	0.44	0.36	0.46	0.48	0.41	0.41	0.35	0.5
10188@uc003fvq.1@uc003fvs.1	AFE	0.0406021	0.5	0.45	0.53	0.69	0.61	0.61	0.68	0.21	0.5	0.53	0.65	0.52	0.56	0.63	0.48	0.55	0.6	0.62	0.68	0.53	0.6	0.55	0.49	0.62	0.63	0.7	0.67	0.74	0.64	0.65	0.64	0.63	0.57
10188@uc003fvr.1@uc003fvt.1	AFE	0.0279156	NA	NA	NA	0.18	NA	0.59	NA	NA	0.12	NA	0.1	0.21	NA	0.26	NA	0.1	NA	0.33	0.17	0.26	NA	0.43	0.25	NA	0.24	NA	0.35	0.62	0.44	NA	NA	0.45	NA
1022@uc003moc.2uc003mod.2uc003moe.2@uc003jvs.2uc003jvt.2uc003jvu.2	ALE	0.0324701	NA	NA	NA	0.63	NA	0.63	0.61	NA	NA	NA	0.69	NA	0.64	0.64	NA	0.71	0.56	0.58	NA	NA	0.71	0.8	0.75	0.63	0.64	NA	NA	0.77	NA	NA	NA	NA	NA
10250@uc009vri.1@uc009vrh.1	AFE	0.0364004	NA	0.49	NA	0.27	0.29	NA	0.16	0.24	0.18	NA	0.3	NA	0.32	NA	NA	0.1	0.54	NA	0.73	NA	0.16	0.15	NA	NA	NA	0.19	0.19	0.22	0.1	0.11	NA	0.14	0.32
10329@uc001srs.1@uc001srq.1	AFE	0.0474138	0.29	0.47	0.64	0.61	0.19	0.38	0.26	NA	0.59	0.48	0.3	0.63	0.43	0.74	0.67	0.43	0.56	NA	0.69	0.6	0.6	0.27	0.28	0.54	0.55	0.33	0.22	0.15	0.16	0.38	0.3	0.69	0.36
10347@uc002lqy.1@uc002lqw.2uc010dsa.1	AFE	0.0357701	NA	NA	NA	NA	0.52	0.5	NA	NA	0.55	NA	0.53	NA	NA	0.51	NA	NA	NA	NA	NA	NA	NA	0.45	0.39	NA	NA	NA	0.45	NA	NA	NA	NA	NA	NA
10381@uc002fpi.1@uc002fpf.2	AFE	0.0154164	NA	NA	NA	0.69	0.76	0.71	0.75	0.64	NA	NA	0.81	NA	0.71	NA	NA	0.51	0.67	NA	NA	NA	NA	0.43	0.62	NA	NA	0.62	0.65	0.65	0.49	NA	NA	NA	NA
10381@uc002fpk.1@uc002fph.1	AFE	0.0330035	NA	NA	0.47	0.44	0.39	0.63	0.49	0.48	NA	0.51	0.44	0.45	0.47	0.48	0.61	0.43	0.56	NA	NA	0.51	0.61	0.49	0.48	0.49	NA	0.59	0.44	0.72	0.51	0.59	0.59	0.59	0.56
10390@uc009wfz.1@uc001eag.2uc001eah.1	AFE	0.0205188	0.64	0.62	0.52	0.49	0.41	0.59	0.62	NA	0.6	0.55	0.52	0.57	0.52	0.46	0.68	0.56	0.53	NA	0.6	0.49	0.58	0.46	0.35	0.51	0.45	0.49	NA	0.48	0.56	0.56	0.52	0.49	0.49
10396@uc003gwq.2@uc003gwr.2uc003gws.2	AFE	0.00808081	NA	0.47	NA	NA	0.61	0.57	0.38	0.65	NA	NA	0.64	NA	NA	NA	NA	0.55	NA	0.5	NA	NA	NA	0.45	NA	NA	NA	0.29	NA	0.31	0.22	NA	NA	NA	NA
10413@uc001pgw.1@uc001pgs.1uc001pgt.1uc001pgu.1uc001pgv.1	AFE	0.0142162	0.51	0.6	0.58	0.3	0.45	0.68	0.42	0.43	0.18	0.03	0.45	0.14	0.23	0.01	0.18	0.41	0.14	0.64	0.05	0.36	0.28	0.5	0.62	0.57	0.53	0.58	0.77	0.55	0.36	0.3	0.6	0.73	0.55
10443@uc001uuh.2@uc001uuk.2	AFE	0.00400628	0.51	0.47	0.55	0.42	0.42	0.48	0.55	0.51	0.46	0.5	0.4	0.63	0.46	0.45	0.43	0.54	0.39	0.39	0.42	0.45	0.4	0.59	0.59	0.53	0.69	0.57	0.58	0.61	0.52	0.63	0.64	0.47	0.45
10443@uc001uuj.2@uc001uuk.2	AFE	0.049746	NA	NA	NA	NA	NA	NA	0.63	NA	NA	NA	0.46	NA	NA	0.54	NA	0.53	NA	NA	NA	NA	0.43	0.45	NA	NA	NA	NA	NA	0.45	NA	NA	NA	NA	NA
10450@uc001cds.1uc001cdt.1uc001cdx.1@uc001cdv.1	ALE	0.0091811	0.53	0.63	0.52	0.39	0.71	0.69	0.49	NA	0.48	0.11	0.51	0.56	0.57	0.68	0.61	0.61	0.63	NA	0.61	0.67	0.22	0.47	0.35	0.51	0.57	0.28	0.5	0.48	0.17	0.29	0.57	0.56	0.59
10450@uc001cds.1uc001cdt.1uc001cdx.1@uc001cdw.1	ALE	0.00448396	0.74	0.85	0.81	0.81	0.92	0.89	0.7	NA	0.77	0.55	0.85	0.83	0.73	0.76	0.72	0.64	0.83	0.23	0.68	0.94	0.51	0.82	0.71	0.64	0.69	0.62	0.72	0.65	0.55	0.67	0.71	0.57	0.64
10494@uc002wbk.1uc002wbl.1@uc002wbm.1	AFE	0.0172412	NA	0.49	0.53	0.65	0.38	0.6	0.66	0.66	0.76	0.56	0.72	0.74	0.68	0.65	0.62	0.65	0.74	0.59	0.67	0.71	0.71	0.31	0.44	0.55	0.54	0.5	0.46	0.33	0.54	0.71	0.44	0.58	0.7
10495@uc004evv.1@uc004evy.1	AFE	0.0427958	0.59	0.51	NA	0.37	0.47	NA	NA	NA	NA	NA	0.52	0.43	NA	NA	NA	0.39	NA	NA	0.51	NA	0.58	0.52	0.61	NA	0.43	NA	NA	0.59	0.56	0.65	0.44	0.6	NA
10528@uc002wgn.1@uc002wgh.1	AFE	7.10694e-05	0.44	0.48	0.44	0.56	0.46	0.54	0.48	0.46	0.59	0.47	0.37	0.41	0.4	0.46	0.6	0.44	0.39	0.55	0.53	0.5	0.55	0.62	0.55	0.58	0.59	0.6	0.55	0.63	0.56	0.65	0.63	0.55	0.59
10548@uc001wnc.1@uc001wnb.1	ALE	0.0405717	0.51	0.57	0.82	0.8	0.58	0.58	0.71	0.76	0.63	0.27	0.57	0.62	0.49	0.47	0.65	0.54	0.57	0.6	0.53	0.61	0.65	0.73	0.58	0.67	NA	0.67	0.67	0.64	0.68	0.81	0.61	0.61	0.57
10554@uc003rml.1@uc003oai.1	AFE	0.0354934	0.45	0.2	NA	0.21	0.12	0.25	0.29	NA	0.13	0.07	0.06	0.19	0.12	NA	0.26	0.28	0.15	0.28	NA	0.15	NA	0.31	0.26	0.51	0.32	0.12	NA	0.28	0.23	0.26	0.25	0.25	0.35
10554@uc003rmo.1@uc003oai.1	AFE	0.0165483	0.65	0.65	NA	0.69	0.73	0.55	0.7	NA	0.56	0.78	0.74	0.7	0.61	NA	0.45	0.48	0.71	0.63	NA	0.7	NA	0.54	0.55	0.5	0.5	0.72	NA	0.56	0.58	0.58	0.41	0.57	0.53
10554@uc003rmp.1@uc003oai.1	AFE	0.00521219	0.62	0.78	NA	0.77	0.81	0.73	0.73	NA	0.8	0.9	0.9	0.78	0.86	NA	0.65	0.71	0.85	0.74	NA	0.79	NA	0.67	0.68	0.62	0.52	0.85	NA	0.71	0.7	0.7	0.71	0.72	0.7
10554@uc003seg.1@uc003rmn.1	AFE	0.00100158	0.15	0.09	NA	0.13	0.05	0.15	0.17	NA	0.11	0.02	0.04	0.08	0.07	NA	0.33	0.15	0.07	0.14	NA	0.07	NA	0.26	0.21	0.24	0.35	0.07	NA	0.2	0.19	0.23	0.2	0.17	0.21
10669@uc002riq.1@uc002rip.1	ALE	0.0221702	0.23	0.1	0.38	0.46	0.17	0.38	0.3	0.1	0.27	0.17	0.41	0.11	0.52	0.04	0.18	0.73	0.27	0.33	0.78	0.14	NA	0.65	0.06	NA	NA	0.72	0.6	0.71	0.26	0.86	0.74	NA	0.56
10677@uc001sqk.1@uc009zqe.1	AFE	0.036886	NA	0.46	NA	0.62	NA	0.51	0.42	NA	0.4	0.49	0.46	0.52	0.61	0.39	0.42	0.48	0.56	NA	NA	0.54	0.54	0.56	0.5	0.54	NA	0.63	0.65	0.58	0.46	0.7	0.68	0.49	0.43
10724@uc001ktw.1@uc001ktv.1uc009xws.1	ALE	0.0243466	0.71	0.83	0.82	0.78	0.83	0.67	0.79	0.74	0.76	0.93	0.85	0.86	0.8	0.81	0.84	0.81	0.79	0.63	0.72	0.82	0.94	0.89	0.76	0.89	0.88	0.82	0.85	0.8	0.8	0.94	0.88	0.76	0.83
10801@uc002jtv.1@uc002jtu.2	AFE	0.0182372	0.69	0.46	0.65	0.64	0.35	0.53	0.35	0.86	0.68	0.69	0.69	0.69	0.8	0.81	0.66	0.42	0.68	0.72	0.63	0.83	0.74	0.17	0.5	0.53	0.6	0.62	0.44	0.54	0.67	0.37	0.45	0.62	0.47
10869@uc003cwb.1@uc003cwc.1uc003cwd.1	ALE	0.0115319	NA	0.86	0.71	0.57	0.88	0.86	0.85	0.87	0.72	0.94	0.87	0.54	0.93	0.86	0.84	0.86	0.94	NA	0.78	0.86	0.66	0.79	0.81	0.73	NA	0.8	0.76	0.82	0.8	0.76	0.78	0.71	0.64
10919@uc003scf.1@uc003sci.1uc003scj.1uc003sck.1	AFE	0.0323998	0.35	0.48	0.5	0.56	0.59	0.42	0.53	0.48	0.49	0.37	0.47	0.41	0.52	0.43	NA	0.51	0.61	NA	NA	0.51	0.47	0.59	0.53	0.51	0.53	0.74	0.66	0.49	0.56	0.49	0.52	0.5	0.59
10921@uc002cpu.1@uc002cpv.1	AFE	0.0371974	0.69	0.71	0.66	0.65	0.65	0.81	0.7	0.49	0.69	0.84	0.87	0.82	0.78	0.85	0.76	0.82	0.79	0.23	0.82	0.8	0.79	0.64	0.46	0.76	0.75	0.78	0.56	0.71	0.56	0.72	0.58	0.44	0.68
11060@uc002exw.1@uc002exv.1	AFE	0.028056	NA	NA	NA	0.44	NA	0.53	0.51	NA	0.49	0.57	0.53	0.64	0.48	0.5	0.35	0.55	NA	NA	0.48	0.58	NA	0.52	NA	NA	NA	0.4	NA	0.46	0.32	0.44	NA	NA	0.46
11064@uc004bky.1@uc004bkw.2	AFE	0.0189344	0.48	NA	0.51	0.32	0.29	0.45	0.57	0.62	0.64	NA	0.35	0.37	0.45	0.52	NA	0.38	0.38	0.38	NA	0.59	NA	0.54	0.49	0.73	0.56	0.67	NA	0.63	0.54	0.55	0.28	0.63	0.67
11064@uc004bla.1@uc004bkx.1uc004blb.1uc010mvp.1	ALE	0.0234981	0.53	0.51	0.6	0.43	0.45	0.55	0.32	NA	0.41	0.57	0.43	0.53	0.4	0.53	NA	0.39	0.48	0.44	0.48	0.46	0.62	0.46	0.46	0.41	0.59	0.56	0.55	0.61	0.44	0.49	0.58	0.6	0.58
11064@uc004blb.1@uc004bky.1	AFE	0.00557792	NA	NA	0.35	0.32	0.22	0.31	0.42	NA	NA	NA	0.15	0.33	0.22	0.39	NA	0.26	0.07	0.31	NA	NA	NA	0.29	0.45	NA	0.57	0.62	0.64	0.39	0.37	0.46	0.19	0.65	0.53
11064@uc010mvo.1@uc004bky.1	AFE	0.028636	NA	0.64	0.36	0.46	0.49	0.53	0.61	0.64	0.53	0.63	0.47	0.51	0.48	0.68	0.56	0.49	0.35	0.24	0.56	0.7	0.6	0.65	0.74	0.57	0.65	0.76	0.44	0.72	0.43	0.72	0.43	0.66	0.77
11064@uc010mvp.1@uc004bky.1	AFE	0.00651287	0.52	0.52	0.26	0.38	0.41	0.36	0.61	NA	0.54	0.73	0.31	0.37	0.44	0.54	0.6	0.5	0.3	0.18	0.58	0.62	0.65	0.6	0.59	0.68	0.64	0.66	NA	0.66	0.44	0.68	0.31	0.54	0.66
11069@uc002uhu.2@uc010fqo.1	ALE	0.018297	NA	NA	NA	0.49	0.51	0.62	0.67	NA	NA	NA	0.51	NA	0.46	NA	NA	NA	NA	NA	NA	NA	NA	0.46	0.39	NA	NA	0.36	NA	NA	0.34	NA	NA	NA	NA
11095@uc001qgf.1@uc001qgg.2	AFE	0.0451511	NA	NA	NA	0.6	0.71	0.73	0.79	0.74	NA	NA	NA	NA	NA	NA	NA	0.76	NA	NA	NA	NA	0.45	0.35	0.69	NA	NA	0.42	0.77	0.65	0.65	NA	0.58	NA	NA
11100@uc002oqf.2@uc002oqe.2	AFE	0.0165005	0.22	0.3	0.12	0.27	0.08	0.09	0.11	0.07	0.79	0.77	0.11	0.7	0.57	0.76	0.57	0.15	0.73	0.65	0.71	0.71	0.18	0.11	0.1	0.21	0.7	0.08	0.05	0.05	0.16	0.22	0.18	0.19	0.05
11132@uc002vzk.1uc002vzl.1uc002vzm.1uc002vzn.1@uc002vzq.1	ALE	0.0156792	0.33	0.7	0.35	0.2	0.1	0.16	0.06	0.15	0.39	0.43	0.08	0.75	0.24	0.71	0.4	0.14	0.14	0.39	0.23	0.51	0.25	0.04	0.08	0.1	0.37	0.09	0.11	0.15	0.18	0.2	0.1	0.1	0.22
11152@uc004dmj.1@uc004dmn.1	AFE	0.00184619	0.55	0.63	0.68	0.56	0.49	0.53	0.42	NA	0.54	0.6	0.51	0.53	0.44	0.54	0.56	0.57	0.57	0.58	0.47	0.56	0.48	0.47	0.34	0.59	0.51	0.38	0.52	0.48	0.48	0.32	0.48	0.44	0.42
11219@uc004fhj.1@uc010nue.1	AFE	0.0207843	NA	NA	NA	NA	0.57	0.55	0.55	NA	NA	NA	0.5	NA	NA	NA	NA	0.53	NA	NA	NA	NA	NA	0.44	0.51	NA	NA	0.48	NA	0.48	0.38	NA	NA	NA	NA
112752@uc010asl.1@uc010asm.1uc001xsg.2	ALE	0.0456486	NA	0.48	0.33	0.3	0.4	0.43	0.56	NA	0.54	0.45	0.44	0.55	0.54	0.48	0.4	0.45	0.41	NA	0.38	0.46	0.45	0.46	0.51	0.49	NA	0.7	NA	0.54	0.44	0.51	NA	NA	0.58
11276@uc002hof.1@uc002hoa.1uc002hob.1uc002hoc.1uc002hod.1uc002hoe.1	ALE	0.030768	0.46	0.15	0.3	0.31	0.24	0.25	0.27	0.5	0.52	0.3	0.22	0.21	0.26	0.37	0.36	0.25	0.17	0.3	0.27	0.22	0.23	0.19	0.22	0.27	0.26	0.25	0.07	0.27	0.24	0.17	0.18	0.16	0.31
11276@uc002hog.1@uc002hoa.1uc002hob.1uc002hoc.1uc002hod.1uc002hoe.1	AFE	0.0204116	NA	0.32	NA	NA	NA	NA	0.51	NA	0.53	NA	0.48	0.31	NA	NA	NA	NA	NA	0.44	0.56	NA	NA	0.6	0.65	NA	NA	0.56	0.64	0.62	0.64	0.52	0.37	NA	NA
11276@uc010cvd.1@uc002hog.1	AFE	0.0184131	NA	0.55	NA	0.12	0.11	0.3	0.21	NA	0.52	0.32	0.24	0.24	0.14	NA	NA	0.21	0.1	0.56	0.1	NA	0.21	0.65	0.56	NA	0.22	0.38	0.47	0.48	0.63	0.31	0.58	NA	0.29
11284@uc002pqg.1@uc002pqj.1uc010enm.1uc002pqk.1	AFE	0.024274	0.53	0.06	0.33	0.24	0.47	0.46	0.18	0.02	0.71	0.75	0.14	0.58	0.64	0.63	0.59	0.38	0.68	0.54	0.61	0.69	0.27	0.12	0.31	0.29	0.56	0.15	0.11	0.21	0.45	0.2	0.25	0.48	0.4
113@uc002egb.1@uc002egd.1	ALE	0.0214188	0.64	0.46	0.46	0.51	0.5	0.56	0.53	0.41	0.53	0.32	0.37	0.43	0.52	0.45	0.53	0.53	0.41	0.41	0.65	0.46	0.61	0.45	0.46	0.53	0.58	0.64	0.67	0.52	0.54	0.67	0.46	0.53	0.53
11311@uc009wlm.1@uc001etp.1uc001etq.1	ALE	0.026775	0.41	0.54	0.52	0.53	0.55	0.46	0.47	0.54	0.56	0.56	0.61	0.46	0.46	0.58	0.62	0.46	0.68	NA	0.25	0.42	0.35	0.46	0.44	0.39	0.49	0.5	0.5	0.37	0.48	0.5	0.41	0.51	0.46
113878@uc003ufl.1@uc003ufg.2	AFE	0.0258499	NA	0.45	0.46	0.44	0.45	0.5	0.49	0.41	0.44	0.67	0.49	0.5	0.47	0.49	0.52	0.6	0.54	NA	0.5	0.41	0.64	0.49	0.53	0.57	NA	0.51	0.54	0.47	0.51	0.51	0.52	0.59	0.48
113878@uc003ufm.2@uc003ufl.1	AFE	0.0268831	NA	NA	NA	NA	0.5	NA	0.5	NA	0.47	NA	0.53	NA	NA	NA	NA	0.44	0.53	NA	NA	NA	NA	NA	0.61	NA	NA	NA	0.54	0.65	NA	NA	NA	NA	NA
114609@uc001qdl.1uc009zcb.1@uc001qdm.1	ALE	0.0352713	0.57	0.57	0.71	0.85	0.75	0.89	0.73	0.46	0.73	0.7	0.7	0.71	0.7	0.84	0.67	0.72	0.67	0.54	0.73	0.81	0.81	0.68	0.8	0.66	NA	0.45	0.6	0.62	0.69	0.6	0.67	0.32	0.45
114609@uc001qdl.1uc009zcb.1@uc001qdn.1uc001qdo.1	ALE	0.0203136	0.57	0.53	0.67	0.86	0.71	0.84	0.64	0.43	0.76	0.67	0.66	0.69	0.68	0.81	0.7	0.71	0.68	0.66	0.67	0.81	0.72	0.66	0.76	0.67	NA	0.45	0.57	0.58	0.64	0.59	0.63	0.38	0.45
114803@uc001czd.2@uc009waa.1uc009wab.1	ALE	0.0190534	0.31	0.53	0.61	0.4	0.58	0.64	0.61	0.64	0.55	0.47	0.69	0.51	0.61	0.62	0.6	0.56	0.55	0.56	0.61	0.56	0.54	0.15	0.66	0.24	0.55	0.37	0.58	0.5	0.58	0.54	0.28	0.5	0.49
114815@uc001kyn.1@uc001kyl.1uc009xxs.1	ALE	0.0174076	NA	NA	NA	0.88	0.77	0.87	0.8	NA	NA	NA	0.57	0.83	NA	0.81	NA	0.84	0.75	0.77	NA	0.74	0.82	0.77	0.69	0.4	0.71	0.64	0.7	0.93	0.65	0.65	0.59	0.53	0.72
115703@uc010eek.1@uc002obs.1uc002obv.1	ALE	0.0313659	NA	NA	NA	0.41	0.64	0.46	0.37	0.4	0.52	0.49	0.57	0.44	0.39	0.43	NA	0.38	0.62	NA	0.53	0.42	NA	0.73	0.49	NA	NA	0.47	0.73	0.61	0.52	NA	NA	NA	0.53
115752@uc002apq.1@uc002app.1uc010bho.1	ALE	0.00102931	0.34	0.78	0.53	0.32	0.59	0.59	0.58	0.28	0.47	0.09	0.66	0.38	0.49	0.42	0.32	0.44	0.43	0.35	0.44	0.51	0.54	0.61	0.58	0.77	0.66	0.58	0.4	0.61	0.64	0.69	0.63	0.87	0.61
116447@uc010mfc.1@uc010mfd.1	AFE	0.0119688	NA	0.56	0.35	0.51	0.4	0.51	0.16	0.54	0.52	0.33	0.35	0.3	0.24	0.23	NA	0.11	0.21	NA	0.66	0.55	0.62	0.71	0.5	0.31	0.48	0.66	0.56	0.69	0.58	0.47	0.41	0.51	0.57
116841@uc001hrg.1@uc001hqz.1	ALE	0.0425498	NA	0.43	0.67	0.65	0.44	0.47	0.57	0.56	0.53	0.49	0.53	0.57	0.61	0.6	0.58	0.47	0.33	NA	0.48	0.51	0.55	0.46	0.55	0.36	NA	0.44	NA	0.43	0.53	0.44	0.51	0.47	0.44
117143@uc001gdv.1@uc001gdw.1uc009wve.1	AFE	0.00595932	0.51	0.58	0.61	0.53	0.5	0.63	0.46	0.57	0.55	0.5	0.59	0.31	0.49	0.56	0.51	0.59	0.41	0.57	0.57	0.66	0.49	0.48	0.45	0.48	0.53	0.48	NA	0.49	0.39	0.35	0.55	0.48	0.52
118@uc003gfu.1@uc003gft.2	AFE	0.0220734	0.58	0.47	0.44	0.45	0.48	0.57	0.47	0.46	0.49	0.47	0.56	0.54	0.41	0.46	0.49	0.37	0.51	0.56	0.52	0.4	0.54	0.49	0.69	0.42	0.6	0.57	0.52	0.43	0.56	0.52	0.52	0.62	0.59
1191@uc003xfx.1@uc003xfy.1	AFE	0.0357143	NA	NA	NA	NA	0.68	0.53	NA	NA	NA	NA	0.65	NA	NA	NA	NA	NA	NA	NA	NA	NA	NA	0.52	NA	NA	NA	0.51	NA	0.45	0.43	NA	0.39	NA	NA
121512@uc001rlc.1@uc001rkx.2uc001rkz.1	AFE	0.0233073	0.68	0.62	0.66	0.83	0.59	0.61	0.68	0.61	0.5	0.63	0.67	0.67	0.76	0.51	0.56	0.56	0.42	0.45	0.56	0.52	0.62	0.63	0.9	0.58	0.69	0.68	0.65	0.6	0.82	0.72	0.73	0.6	0.81
121512@uc001rlc.1@uc001rky.1	AFE	0.033832	0.4	0.52	0.51	0.53	0.51	0.54	0.43	0.46	0.53	0.36	0.47	0.48	0.59	0.37	0.48	0.52	0.38	0.45	0.54	0.41	0.61	0.52	0.58	0.45	0.57	0.49	0.38	0.48	0.57	0.53	0.56	0.51	0.6
121551@uc001tml.1@uc009zut.1uc001tmj.2uc001tmk.1	AFE	0.0203035	NA	NA	NA	0.52	0.44	0.49	0.52	0.39	NA	NA	0.58	NA	NA	NA	0.48	0.42	0.5	0.54	0.4	NA	NA	0.48	0.59	0.53	NA	0.51	0.57	0.65	0.51	0.57	0.62	NA	NA
1232@uc003cpi.1@uc003cpl.1	AFE	0.034452	0.72	NA	NA	0.85	0.75	0.61	0.76	0.64	NA	NA	0.84	NA	0.81	0.78	0.63	NA	0.87	NA	NA	0.75	NA	0.74	0.73	0.67	NA	0.66	0.64	NA	0.42	NA	NA	NA	0.34
1232@uc003cpj.1@uc003cpl.1	AFE	0.034452	0.62	NA	NA	0.79	0.72	0.7	0.87	0.65	NA	NA	0.77	NA	0.86	0.79	0.61	NA	0.82	NA	NA	0.73	NA	0.76	0.72	0.52	NA	0.68	0.66	NA	0.5	NA	NA	NA	0.45
124935@uc002fsw.2uc002fsx.2@uc002fsu.1uc002fsv.1	ALE	0.0332212	0.95	0.95	0.88	0.91	0.94	0.88	0.95	0.89	0.94	0.94	0.98	0.96	0.84	0.97	0.85	0.95	0.95	0.84	0.84	0.96	0.78	0.95	0.96	0.76	0.62	0.93	0.9	0.94	0.87	0.92	0.84	0.82	0.85
125115@uc010diy.1@uc002hvp.1	AFE	0.0390363	NA	NA	0.65	0.49	NA	0.7	0.57	NA	0.66	NA	0.69	0.73	0.48	0.38	0.67	0.62	0.66	NA	NA	0.78	NA	NA	0.65	NA	0.59	0.39	NA	0.48	0.52	0.36	NA	NA	NA
1267@uc002hyk.1@uc002hyl.1uc002hym.1uc002hyn.1	ALE	0.044413	0.52	0.45	0.33	0.55	0.35	0.38	0.31	0.3	0.43	0.37	0.32	0.41	0.46	0.4	0.51	0.43	0.41	0.38	0.49	0.42	0.5	0.45	0.34	0.55	0.84	0.39	0.34	0.42	0.54	0.51	0.5	0.52	0.45
1267@uc002hyn.1@uc002hym.1	AFE	0.0126219	0.55	0.43	0.57	0.53	0.5	0.48	0.44	0.43	0.6	0.48	0.5	0.49	0.55	0.35	0.48	0.39	0.32	0.59	0.51	0.52	0.55	0.52	0.57	0.58	0.45	0.57	0.62	0.59	0.55	0.58	0.48	0.59	0.5
126789@uc009vjx.1@uc001aed.1	AFE	0.001497	NA	NA	NA	0.48	0.4	0.47	0.56	0.56	0.38	0.53	0.55	0.62	0.45	0.39	0.56	0.27	0.45	NA	0.51	0.4	NA	0.67	0.54	NA	NA	0.69	0.57	0.59	0.58	0.58	NA	0.72	0.51
1308@uc009xxp.1@uc009xxo.1	ALE	0.0224415	NA	NA	0.71	0.7	0.66	0.53	0.64	NA	0.65	NA	0.66	NA	NA	NA	0.71	0.67	NA	NA	0.48	NA	0.61	0.41	NA	0.39	NA	0.64	NA	0.6	NA	NA	NA	0.63	NA
135112@uc003qaj.2@uc010ket.1	ALE	0.0183683	NA	0.59	NA	0.45	0.46	0.52	0.6	NA	NA	NA	0.54	NA	0.45	0.54	NA	0.49	0.45	NA	NA	NA	NA	0.48	0.51	NA	NA	NA	0.39	0.45	0.35	0.42	NA	0.41	NA
1356@uc003ewz.2@uc003ewx.2uc003ewy.2	ALE	0.0218913	NA	0.53	0.48	0.6	0.48	0.51	0.45	NA	0.51	0.47	0.57	0.42	0.5	0.57	0.66	0.57	0.48	0.51	0.49	0.58	0.54	0.52	0.48	0.38	0.55	0.41	0.4	0.43	0.48	0.45	0.46	0.49	0.48
1356@uc010hvf.1@uc003ewx.2	AFE	0.0227516	NA	NA	NA	NA	0.48	NA	0.47	NA	NA	NA	0.55	NA	NA	NA	0.56	0.46	0.59	NA	NA	0.55	0.43	0.44	0.36	NA	NA	0.33	NA	0.51	NA	NA	NA	NA	NA
135656@uc003nsg.1@uc003rww.1	AFE	0.0477301	NA	NA	0.28	0.29	0.16	0.12	0.1	0.22	0.2	0.36	0.06	0.28	0.22	0.13	0.24	0.22	0.22	0.43	NA	0.15	0.39	0.23	0.18	NA	0.45	0.26	0.39	0.1	0.38	0.23	0.31	0.29	NA
1375@uc003bmt.1@uc003bmu.1	AFE	0.0295849	0.5	0.41	0.81	0.62	0.49	0.63	0.69	0.47	0.84	0.75	0.67	0.77	0.67	0.71	0.79	0.49	0.82	0.67	0.89	0.8	0.68	0.56	0.71	0.48	0.54	0.48	0.49	0.61	0.51	0.46	0.65	0.66	0.64
137695@uc003xsi.1@uc003xsg.1uc003xsh.1	ALE	0.0462908	0.29	0.33	0.45	0.22	0.24	0.26	0.25	0.64	0.39	0.2	0.24	0.21	0.3	0.16	0.18	0.33	0.3	0.31	0.29	0.36	0.22	0.2	0.2	0.16	0.16	0.28	0.12	0.31	0.18	0.18	0.4	0.21	0.42
1388@uc003nzn.1uc003nzo.1@uc003rlw.1	ALE	0.0120373	0.43	0.53	0.35	0.44	0.52	0.62	0.45	0.5	0.5	0.44	0.43	0.44	0.45	0.53	0.59	0.5	0.48	0.42	0.49	0.43	0.56	0.46	0.63	0.51	0.53	0.62	0.54	0.58	0.46	0.43	0.63	0.48	0.6
1390@uc001iyj.1uc001iyk.1@uc001iyc.1	AFE	0.0174546	NA	0.57	NA	NA	0.59	NA	0.58	0.51	0.57	NA	0.34	0.58	NA	NA	0.49	0.45	0.65	NA	0.6	0.58	NA	0.63	NA	NA	NA	0.59	NA	0.73	0.65	NA	NA	NA	NA
1390@uc001iyq.1uc001iyr.1@uc001iya.1	AFE	0.0284295	NA	NA	NA	NA	0.47	0.46	NA	NA	NA	NA	0.32	NA	NA	NA	NA	0.47	NA	NA	NA	NA	NA	0.52	0.52	NA	NA	0.48	NA	NA	NA	0.58	NA	NA	NA
143279@uc001khn.1@uc001khk.2uc001khl.2	AFE	0.0424242	NA	0.48	NA	NA	0.37	0.57	0.33	NA	NA	NA	0.44	NA	0.53	NA	NA	0.55	NA	NA	NA	NA	0.64	NA	0.6	NA	NA	0.51	NA	0.62	NA	NA	NA	NA	NA
144132@uc001mdp.1uc001mdq.1@uc001mdw.2uc001mea.2uc001mec.1uc009yfg.1	ALE	0.0347115	NA	0.53	NA	0.68	0.36	0.46	0.3	NA	0.57	0.54	0.18	0.57	0.68	0.21	0.33	0.67	0.69	0.52	0.53	0.2	0.59	0.6	0.7	NA	0.57	0.59	NA	0.6	0.48	0.36	0.75	0.73	NA
144132@uc001mds.1@uc001meb.2	ALE	0.0345815	0.32	0.51	0.7	0.63	0.78	0.6	0.78	0.66	0.71	0.52	0.63	0.37	0.7	0.4	0.41	0.62	0.42	NA	0.57	0.41	0.74	0.76	0.64	0.56	0.83	0.7	0.66	0.52	0.66	0.71	0.69	0.56	0.74
1453@uc010dim.1@uc002kef.1	ALE	0.0143942	NA	0.51	0.67	0.73	0.53	0.65	0.68	0.33	0.74	0.63	0.63	0.57	0.63	0.77	0.42	0.37	0.69	NA	0.65	0.76	NA	0.29	0.64	0.49	0.5	0.47	0.58	0.46	0.26	0.57	NA	NA	0.59
1460@uc010kqe.1@uc010kmw.1	ALE	0.0235484	0.1	0.46	0.23	0.09	0.19	0.45	0.4	NA	0.31	0.54	0.23	0.38	0.14	0.27	0.35	0.62	0.13	0.29	0.82	0.32	0.27	0.52	0.2	0.63	0.69	0.55	0.68	0.57	0.24	0.49	0.45	0.34	0.66
146909@uc002iht.1@uc002ihu.1	AFE	0.0179015	NA	NA	0.57	NA	0.55	0.57	0.4	0.45	NA	0.52	0.59	0.58	0.6	NA	NA	NA	0.6	NA	NA	0.55	NA	NA	0.34	NA	NA	0.43	0.5	0.47	NA	0.47	0.51	NA	NA
148@uc003xfh.1@uc003xfg.1	ALE	0.0162059	NA	NA	0.16	0.52	0.38	NA	0.25	NA	0.49	NA	0.36	NA	NA	NA	NA	0.32	NA	NA	NA	0.16	0.49	0.47	0.62	NA	NA	0.6	NA	0.6	0.49	NA	NA	NA	NA
150000@uc002yjq.1@uc002yjr.1uc010gkx.1	ALE	0.038051	0.43	0.39	0.49	0.57	0.42	0.63	0.42	NA	0.42	0.71	0.39	0.42	0.51	0.49	0.51	0.56	0.39	0.49	0.54	0.59	0.68	0.58	0.46	0.57	NA	0.51	0.49	0.55	0.64	0.55	NA	0.58	0.51
151295@uc002vjs.1uc002vjt.1@uc010fwb.1	ALE	0.0102849	0.54	0.48	0.58	0.44	0.44	0.54	0.46	NA	0.54	0.4	0.59	0.54	0.44	0.36	0.43	0.39	0.53	0.37	0.56	0.6	0.61	0.62	0.56	NA	0.61	0.62	0.52	0.6	0.51	NA	0.36	0.66	0.55
152503@uc003imc.2@uc010ipl.1	AFE	0.0156617	0.61	0.55	0.61	0.54	0.59	0.53	0.57	0.51	0.36	0.45	0.59	0.54	0.39	0.33	0.75	0.59	0.39	0.59	0.23	0.39	0.68	0.56	0.77	0.87	0.65	0.74	0.58	0.67	0.5	0.58	0.84	0.46	0.52
152518@uc003gxo.1@uc010igh.1	AFE	0.041637	NA	NA	NA	0.41	0.53	NA	0.49	0.53	NA	NA	0.6	NA	0.69	NA	NA	NA	0.46	NA	NA	NA	NA	0.51	0.39	0.38	NA	0.46	0.4	NA	NA	NA	NA	NA	NA
1535@uc002fle.1@uc002flb.1	ALE	0.0432979	0	0	0	0	0	0	0	0	0.53	0.59	0	0.64	0	0.41	0.01	0	0.7	0.04	0.62	0.36	0	0	0	0	0.01	0	0	0	0.01	0	0	0	0
155435@uc003wmg.2@uc003wme.2uc010lqj.1uc010lqk.1	AFE	0.0380053	NA	0.54	0.61	0.69	0.48	0.32	0.51	0.15	0.78	0.82	0.55	0.88	0.65	0.83	0.42	0.35	0.87	NA	0.69	0.73	0.54	0.44	0.4	0.52	NA	0.5	0.18	0.43	0.66	0.17	0.3	0.49	0.7
157313@uc003xer.1@uc003xep.1	AFE	0.0137225	NA	NA	0.76	0.7	0.84	0.68	0.68	NA	NA	0.73	0.81	0.74	NA	0.79	NA	0.69	0.88	NA	0.67	0.78	NA	0.9	0.57	0.74	0.72	0.69	0.31	0.67	0.62	0.48	NA	0.5	0.63
1577@uc003urr.1@uc003urs.1	AFE	0.0388269	0.67	0.95	0.72	0.6	0.71	0.67	0.68	0.52	0.62	0.88	0.69	0.78	0.68	0.75	0.65	0.82	0.77	0.57	0.77	0.49	0.74	0.73	0.86	0.76	0.78	0.72	0.78	0.74	0.79	0.83	0.73	0.68	0.74
158471@uc010mpl.1@uc004aki.2uc004akj.2uc010mpk.1	ALE	0.00124947	0.39	0.59	0.5	0.66	0.48	0.56	0.63	0.49	0.51	0.43	0.54	0.53	0.55	0.52	0.49	0.45	0.52	0.49	0.38	0.56	0.5	0.46	0.46	0.4	0.44	0.38	0.52	0.42	0.37	0.35	0.36	0.44	0.47
161497@uc001zse.1@uc010bdl.1	AFE	0.0400855	NA	NA	0.6	NA	0.62	NA	0.43	NA	0.43	NA	0.24	NA	0.29	0.35	NA	NA	0.2	0.4	0.48	NA	NA	0.44	NA	0.64	NA	NA	NA	0.68	0.55	NA	NA	NA	NA
1628@uc010elz.1@uc002pjx.2	ALE	0.0162651	0.09	0.09	0.05	0.15	0.14	0.06	0.17	0.12	0.24	0.12	0.05	0.07	0.41	0.07	0.13	0.1	0.07	NA	NA	0.05	0.34	0.06	0.14	0.42	NA	0.1	0.16	0.33	0.14	0.24	NA	NA	0.3
1636@uc010ddu.1@uc002jau.1uc002jav.1uc010ddv.1	ALE	0.0447664	0.05	0.11	0.05	0.47	0.15	0.16	0.26	0.04	0.24	0.35	0.06	0.03	0.35	0.02	0.04	0.12	0.17	0.14	0.18	0.03	0.4	0.14	0.03	0.37	0.27	0.15	NA	0.17	0.11	0.23	0.37	0.61	0.3
165@uc003tkc.2@uc003tkb.1	AFE	0.0356123	0.69	0.18	0.51	0.68	0.43	0.42	0.4	0.21	0.25	0.13	0.27	0.22	0.56	0.1	0.44	0.48	0.11	0.55	0.23	0.36	0.75	0.53	0.13	0.76	0.64	0.15	0.25	0.53	0.79	0.47	0.57	0.53	0.55
1657@uc003kse.1@uc003ksc.1	AFE	0.0156433	NA	NA	NA	0.54	0.54	0.64	0.46	NA	0.49	0.55	0.48	0.42	0.55	0.34	0.51	0.49	0.59	0.46	0.68	NA	NA	0.35	0.49	NA	0.36	0.41	NA	0.59	0.37	0.39	0.45	0.4	0.48
166378@uc003iey.2@uc003iez.2	ALE	0.0182469	0.3	0.49	0.54	0.27	0.73	0.72	0.37	0.52	0.62	0.59	0.65	0.63	0.49	0.67	0.61	0.7	0.28	0.59	0.64	0.45	0.64	0.76	0.65	0.64	0.52	0.69	0.61	0.71	0.69	0.69	0.68	0.57	0.66
169792@uc003zhy.1uc003zhz.1@uc003zhw.1	AFE	0.0477281	NA	NA	NA	0.54	0.64	0.79	0.56	NA	0.56	0.63	0.67	NA	0.56	0.47	NA	0.61	0.66	NA	0.72	0.68	0.49	0.49	0.56	0.59	0.62	0.73	0.54	0.69	0.54	0.48	0.5	0.5	0.38
169792@uc003zib.1@uc003zih.1	AFE	0.0464707	NA	NA	NA	0.74	0.65	0.82	0.7	NA	0.71	0.72	0.8	0.15	0.67	0.45	NA	0.79	0.74	NA	0.73	0.66	0.71	0.61	0.62	0.68	0.7	0.84	0.62	0.66	0.64	0.59	0.55	0.51	0.42
1727@uc003bcx.2@uc003bcz.2	AFE	0.0218393	NA	NA	NA	0.48	NA	0.41	NA	NA	0.47	0.54	NA	0.63	NA	NA	NA	NA	0.53	NA	NA	0.48	NA	NA	0.29	NA	NA	0.38	NA	0.38	NA	NA	NA	NA	NA
1756@uc004dcr.1uc004dcs.1uc004dct.1uc004dcu.1uc004dcv.1@uc010ngo.1	AFE	0.00667664	0.41	0.36	0.34	0.12	0.49	0.36	0.29	0.61	0.26	0.52	0.57	0.49	0.33	0.26	0.42	0.31	0.66	0.63	0.49	0.35	0.12	0.19	0.34	0.26	0.24	0.34	0.61	0.28	0.12	0.21	0.21	0.3	0.42
1756@uc004dcy.1@uc010ngo.1	AFE	0.0478935	0.62	0.64	0.49	0.84	0.64	0.68	0.86	NA	0.56	NA	0.61	NA	0.67	0.74	0.52	0.95	NA	NA	0.71	0.73	0.88	0.77	0.68	0.71	0.76	0.79	NA	0.82	0.87	0.75	0.79	0.64	0.66
1756@uc004dcz.2@uc004dda.1uc010ngr.1	AFE	0.023044	0.32	0.22	0.28	0.11	0.66	0.2	0.12	NA	0.31	0.54	0.34	0.69	0.38	0.09	0.55	0.16	0.59	0.66	0.28	0.11	0.04	0.1	0.25	0.34	0.14	0.22	NA	0.16	0.07	0.26	0.06	0.26	0.29
1756@uc010ngp.1@uc010ngo.1	AFE	0.0132621	0.55	0.37	0.48	0.48	0.63	0.5	0.45	NA	0.46	NA	0.39	NA	0.49	0.47	0.41	0.47	NA	NA	0.51	0.55	0.56	0.53	0.46	0.48	0.66	0.55	NA	0.7	0.55	0.51	0.59	0.48	0.55
1768@uc002sor.2@uc002soo.1	AFE	0.0289465	NA	NA	0.38	0.47	NA	0.34	0.53	NA	NA	0.54	0.42	NA	NA	NA	NA	0.5	NA	NA	NA	NA	0.55	0.53	NA	NA	NA	0.58	NA	0.51	0.51	0.67	NA	NA	0.53
1797@uc003nys.1@uc003rla.1uc003rlb.1uc003rlc.1uc003rld.1	ALE	0.0312228	NA	0.49	0.37	0.49	0.49	0.54	0.45	0.56	0.53	0.58	0.48	0.53	0.57	0.5	0.37	0.44	0.41	0.39	0.31	0.53	0.6	0.56	0.51	0.51	0.52	0.62	0.63	0.51	0.51	0.63	0.46	0.46	0.53
1838@uc002rgq.1@uc001042.uc002rgo.1	ALE	0.0415705	NA	NA	NA	0.46	0.48	NA	0.48	NA	NA	NA	0.47	NA	0.54	NA	NA	NA	0.45	NA	NA	NA	NA	0.7	NA	NA	NA	0.55	NA	0.49	0.49	NA	NA	NA	NA
1842@uc010mqz.1@uc004asf.2uc004ash.1	AFE	0.00790628	0.53	0.5	0.32	0.7	0.69	0.43	0.64	NA	NA	NA	0.49	0.75	0.54	0.49	0.42	0.53	0.24	0.61	NA	0.75	0.23	0.26	0.5	0.58	0.36	0.37	0.45	0.43	0.38	0.36	0.22	0.33	0.53
1842@uc010mqz.1@uc004asg.1uc004asi.2	AFE	0.0236108	0.61	0.45	NA	0.76	0.62	0.64	0.58	NA	NA	NA	0.52	0.76	0.61	0.58	0.71	0.65	0.19	0.39	NA	0.62	0.58	0.35	0.58	0.54	0.61	0.52	0.6	0.52	0.32	0.53	0.57	0.29	0.47
1896@uc004dxl.1@uc004dxm.1	ALE	0.0139024	0.58	NA	0.61	0.55	0.6	0.65	0.55	0.69	NA	NA	0.62	NA	NA	NA	NA	0.69	NA	NA	NA	NA	NA	0.51	0.47	0.43	0.57	0.53	0.61	0.45	0.6	NA	NA	NA	NA
1981@uc003fnr.1@uc003fnw.1	AFE	0.0138905	NA	NA	NA	0.62	0.65	0.67	0.6	NA	0.7	NA	0.84	0.54	0.67	0.4	NA	0.63	0.59	NA	0.54	0.63	NA	0.76	0.71	NA	NA	0.75	NA	0.72	0.64	NA	NA	NA	0.7
1981@uc003fnx.2uc003fny.2@uc003fnw.1	AFE	0.0193557	NA	NA	NA	0.6	0.64	0.52	0.57	NA	0.59	NA	0.64	0.52	0.51	0.57	NA	0.5	0.51	NA	0.58	0.6	NA	0.61	0.64	NA	NA	0.64	NA	0.54	0.66	NA	NA	NA	0.65
199953@uc001apz.1@uc001apy.1	AFE	0.0319491	NA	NA	NA	NA	0.56	NA	0.57	NA	NA	0.48	0.57	NA	NA	NA	NA	0.54	0.49	NA	NA	NA	NA	0.47	0.45	NA	NA	0.35	NA	0.49	NA	NA	NA	NA	NA
20@uc004cko.1@uc010nby.1	AFE	0.0491923	NA	NA	NA	0.36	0.12	0.15	0.16	0.1	0.29	0.15	0.11	0.27	0.45	0.17	NA	0.13	0.43	NA	0.22	0.18	NA	0.13	0.08	NA	NA	0.18	0.05	0.12	NA	NA	NA	NA	NA
200734@uc010fcw.1@uc002sdr.2	AFE	0.0413371	0.53	0.45	0.58	0.41	0.52	0.45	0.47	0.52	0.46	0.42	0.51	NA	0.55	0.62	0.42	0.49	0.44	0.52	0.47	0.46	0.64	0.54	0.51	0.55	0.41	0.55	0.52	0.49	0.46	0.59	0.65	0.53	0.52
2011@uc001nxz.2uc001nya.2@uc001nxw.1uc001nxx.1uc001nxy.1uc001nxv.2	AFE	0.0129166	0.38	0.56	NA	0.59	0.56	0.59	0.59	0.53	0.55	0.61	0.54	0.54	0.45	0.5	0.57	NA	0.49	NA	0.68	0.61	NA	0.49	NA	0.37	NA	0.54	0.55	0.5	0.53	0.45	NA	0.51	0.38
201294@uc010dgq.1@uc002jpq.1	ALE	0.0135596	NA	NA	NA	0.63	0.53	0.39	0.54	NA	0.53	NA	0.55	0.49	0.56	0.61	NA	0.56	0.51	NA	0.4	0.5	NA	0.44	0.39	NA	NA	0.4	0.41	0.5	0.53	0.46	NA	NA	0.34
2013@uc002czy.1@uc002czx.1	ALE	0.0230533	0.51	0.65	0.51	0.52	0.46	0.45	0.41	0.52	0.47	0.36	0.45	0.4	0.5	0.45	0.55	0.54	0.4	0.4	0.52	0.41	0.64	0.47	0.51	0.52	0.55	0.46	0.55	0.45	0.58	0.53	0.63	0.59	0.42
2034@uc002ruw.1@uc002ruv.1	AFE	0.0340114	0.52	0.32	0.26	0.38	0.44	0.46	0.42	0.62	0.73	0.59	0.46	0.68	0.43	0.83	0.28	0.38	0.57	0.5	0.63	0.38	0.27	0.54	0.4	0.37	0.35	0.4	0.17	0.49	0.28	0.58	0.34	0.36	0.43
2035@uc009vtk.1@uc001brm.1	ALE	0.0116285	NA	0.45	0.6	0.6	0.7	0.49	0.52	NA	0.47	NA	0.55	0.43	0.47	0.55	0.44	0.48	0.49	0.57	NA	0.55	NA	0.45	0.41	NA	0.43	0.42	0.49	0.59	0.44	0.47	0.37	0.41	0.5
2037@uc003qcj.1@uc003qch.1uc010kfk.1	AFE	0.015566	0.65	0.5	0.47	0.56	0.51	0.66	0.59	0.51	0.53	0.68	0.42	0.6	0.6	0.47	0.41	0.64	0.52	0.54	0.47	0.53	0.5	0.49	0.51	0.48	0.44	0.49	0.47	0.5	0.36	0.45	0.64	0.51	0.37
2071@uc002toe.1@uc002toh.1uc010fly.1	AFE	0.0467614	0.49	0.56	0.53	0.67	0.46	0.39	0.41	0.54	0.6	0.48	0.49	0.41	0.31	0.4	0.49	0.5	0.58	0.59	0.47	0.37	0.39	0.51	0.6	0.5	NA	0.62	0.54	0.57	0.57	0.62	0.53	0.5	0.54
208@uc002one.1@uc010egs.1	AFE	0.0481402	NA	NA	NA	0.37	NA	NA	NA	NA	0.54	NA	0.45	NA	NA	0.45	NA	NA	0.46	NA	NA	NA	NA	NA	0.54	NA	NA	0.56	NA	NA	NA	NA	0.53	NA	0.6
2104@uc001hkx.1@uc001hkz.1	AFE	0.0394946	NA	0.59	0.57	NA	NA	0.58	0.65	NA	NA	0.51	0.55	0.67	0.63	0.71	0.58	0.53	0.62	NA	0.62	0.62	NA	0.43	0.64	0.55	NA	NA	NA	0.5	NA	0.57	0.53	NA	0.55
2104@uc001hkx.1@uc009xdp.1	AFE	0.0292753	NA	0.68	0.5	0.57	NA	0.64	0.74	NA	NA	0.55	0.72	0.77	0.6	0.79	0.64	0.59	0.59	NA	0.63	0.69	0.56	0.62	0.8	0.58	NA	0.47	NA	0.55	NA	0.5	0.53	NA	0.55
2185@uc003xfr.1@uc010luq.1	AFE	0.0290742	NA	NA	0.59	0.52	0.43	0.58	0.46	NA	0.71	NA	0.51	0.49	0.45	0.61	0.52	0.48	0.59	0.59	0.5	0.44	NA	0.43	0.44	NA	NA	0.36	0.49	0.59	0.5	NA	NA	0.37	0.44
2186@uc002jgh.2@uc002jge.1uc002jgf.1uc002jgg.1	ALE	0.0269337	0.67	0.47	0.58	0.66	0.83	0.8	0.77	0.64	0.8	0.69	0.8	0.75	0.7	0.79	0.78	0.73	0.51	0.66	0.59	0.81	0.55	0.72	0.67	0.36	0.41	0.59	0.71	0.63	0.83	0.36	0.63	0.68	0.5
2192@uc003bgg.1@uc003bgj.1	ALE	0.0393571	0.89	0.93	0.96	0.98	0.98	0.96	0.99	0.93	0.95	0.96	0.99	0.96	0.93	0.92	0.96	0.98	0.96	0.92	0.66	0.95	0.99	0.99	0.98	0.97	0.94	0.99	0.91	0.99	0.98	0.98	0.96	0.96	0.96
2192@uc003bgh.1uc010gzz.1@uc003bgj.1	ALE	0.00279344	0.49	0.61	0.65	0.78	0.69	0.64	0.74	0.36	0.67	0.49	0.68	0.35	0.7	0.44	0.73	0.65	0.35	0.72	0.48	0.39	0.8	0.72	0.72	0.76	0.89	0.68	0.39	0.69	0.8	0.75	0.72	0.75	0.68
2192@uc003bgi.1@uc003bgj.1	ALE	0.0163634	0.88	0.94	0.97	0.99	0.99	0.97	1	0.93	0.97	0.96	0.99	0.97	0.97	0.96	0.97	0.99	0.97	0.94	0.74	0.96	0.99	0.99	1	0.98	0.97	1	0.96	0.98	0.98	0.99	0.97	0.98	0.98
2201@uc003kuv.1@uc003kuu.1	ALE	0.0474811	0.58	NA	0.68	0.78	0.83	0.81	0.67	NA	0.72	NA	0.87	0.61	0.86	0.8	0.62	0.79	0.72	0.63	NA	0.81	0.72	0.92	0.81	0.65	0.75	0.83	NA	0.92	0.89	0.87	0.72	0.81	0.81
221037@uc001jmm.1@uc001jmn.1uc001jmr.1	AFE	0.0421516	0.84	0.77	0.7	0.78	0.78	0.64	0.71	0.53	0.71	0.88	0.85	0.78	0.84	0.77	0.66	0.72	0.61	0.82	0.53	0.86	0.76	0.87	0.72	0.87	0.77	0.89	0.78	0.53	0.88	0.89	0.87	0.74	0.87
221037@uc001jmp.1@uc001jmn.1uc001jmr.1	AFE	0.0405348	0.83	0.79	0.67	0.74	0.73	0.57	0.71	0.25	0.71	0.88	0.82	0.74	0.83	0.78	0.69	0.65	0.58	0.8	0.47	0.81	0.82	0.85	0.67	0.85	0.74	0.83	0.73	0.48	0.88	0.89	0.87	0.71	0.85
221178@uc001uph.1@uc001upd.1	AFE	0.044146	0.42	0.64	0.43	0.47	0.58	0.37	0.57	0.48	0.41	0.44	0.46	0.47	0.48	0.41	0.48	0.63	0.51	0.44	0.46	0.48	0.59	0.61	0.35	0.51	0.52	0.56	0.6	0.53	0.4	0.6	0.64	0.53	0.48
221294@uc003pwl.1@uc003pwj.1uc003pwk.1	AFE	0.0229653	0.53	0.57	0.65	0.44	0.54	0.58	0.52	NA	0.37	0.5	0.47	0.49	0.65	0.57	NA	0.68	0.53	0.43	0.53	0.4	0.49	0.38	0.51	NA	0.48	0.37	0.38	0.54	0.44	NA	0.45	0.47	0.47
221545@uc003nqx.2@uc003nqw.2	AFE	0.00395271	NA	0.7	0.49	0.67	0.65	0.62	0.55	0.58	0.61	0.69	0.73	0.63	0.58	0.61	0.56	0.59	0.61	NA	0.47	0.58	NA	0.57	0.5	0.55	NA	0.42	0.57	0.51	0.52	0.59	NA	0.56	0.5
2217@uc002poh.1@uc002pog.1	AFE	0.0256991	0.58	0.72	0.59	0.85	0.86	0.68	0.66	0.34	0.9	0.9	0.71	0.82	0.71	0.92	0.47	0.71	0.73	0.65	0.84	0.87	0.46	0.64	0.7	0.68	0.59	0.55	0.17	0.62	0.78	0.82	0.53	0.58	0.76
222008@uc010kze.1@uc003tqc.2	ALE	0.0487152	NA	NA	NA	0.22	0.32	0.28	0.16	NA	NA	0.48	0.38	NA	NA	NA	NA	0.24	0.37	NA	NA	NA	0.41	0.47	0.45	0.53	0.68	0.32	0.53	0.29	NA	0.17	0.4	0.56	0.32
222255@uc003vdi.2@uc003vde.2	ALE	0.00981428	0.5	0.22	0.58	0.46	0.56	0.38	0.55	0.49	0.42	0.32	0.63	0.27	0.37	0.46	0.65	0.63	0.59	0.49	0.22	0.22	0.46	0.42	0.77	0.66	0.68	0.72	0.6	0.55	0.42	0.47	0.61	0.78	0.64
2273@uc004ezn.1@uc004ezp.1	AFE	0.00196507	NA	0.44	0.47	0.45	0.39	0.53	0.52	0.47	0.44	0.43	0.4	0.41	0.52	0.43	NA	0.43	0.47	0.57	NA	0.56	0.52	0.58	0.59	0.54	0.6	0.51	0.58	0.55	0.56	0.45	NA	NA	NA
2273@uc004ezr.1@uc004ezp.1	AFE	0.0179807	NA	0.5	0.5	0.57	0.53	0.46	0.53	0.53	0.39	0.56	0.57	0.62	0.57	0.46	0.49	0.49	0.38	0.39	0.52	0.53	0.48	0.66	0.47	0.37	0.42	0.45	0.32	0.42	0.39	0.36	0.47	0.27	0.57
22807@uc002vej.1@uc002vem.1	AFE	0.0377884	NA	NA	NA	0.43	NA	0.47	0.46	NA	0.67	NA	0.48	0.46	NA	NA	NA	NA	NA	NA	NA	0.35	NA	0.49	0.49	NA	NA	0.55	NA	0.65	NA	0.62	NA	0.5	NA
22837@uc002uco.1@uc002ucr.1	AFE	0.0496243	0.48	0.53	0.48	0.7	0.59	0.57	0.47	NA	0.55	0.48	0.55	0.55	0.43	0.52	0.51	0.46	0.51	0.56	0.59	0.41	0.46	0.65	0.49	NA	0.41	0.39	NA	0.43	0.55	0.4	0.49	0.5	0.46
22861@uc002gci.1uc002gch.2uc002gck.1uc002gcj.1uc002gcl.1@uc002gcg.1	ALE	0.0453148	NA	NA	NA	0.72	0.76	0.47	0.65	NA	NA	0.71	0.54	NA	0.61	0.69	NA	0.66	0.76	0.73	NA	0.35	0.38	0.5	0.56	0.71	NA	0.58	0.68	0.49	0.61	0.4	NA	0.62	0.31
22864@uc001snr.2@uc001sns.2uc001snt.2	AFE	0.0299721	0.43	0.4	0.32	0.19	0.26	0.22	0.25	NA	0.79	0.36	0.4	0.27	0.33	0.43	0.58	0.17	0.74	0.38	0.59	0.4	0.27	0.16	0.38	0.23	0.14	0.35	0.23	0.19	0.26	0.19	0.64	0.09	0.42
22898@uc003yvx.2@uc003yvz.1	ALE	0.0423962	NA	0.51	0.62	0.49	0.38	0.5	0.44	0.65	0.27	0.11	0.42	0.48	0.55	0.49	0.65	0.3	0.71	0.39	0.19	0.49	NA	0.25	0.41	0.34	0.34	0.19	0.29	0.52	0.33	0.37	0.54	0.29	0.37
22905@uc002gvc.2@uc002gvd.2uc002gve.2uc002gvf.2	ALE	0.0292313	0.32	0.71	0.42	0.47	0.44	0.39	0.34	0.37	0.44	0.37	0.44	0.37	0.38	0.5	0.44	0.4	0.34	0.6	0.34	0.43	0.82	0.44	0.52	0.48	0.42	0.5	0.41	0.43	0.45	0.42	0.39	0.52	0.57
22905@uc002gvj.2@uc002gvh.1	AFE	0.0335933	0.62	0.54	0.51	0.45	0.66	0.6	0.32	0.51	0.51	0.54	0.48	0.48	0.5	0.62	0.62	0.46	0.43	0.64	0.52	0.6	0.51	0.45	0.43	0.48	0.49	0.49	0.57	0.41	0.42	0.53	0.49	0.51	0.44
22980@uc002fpc.1@uc002fpb.1	AFE	0.0462908	0.48	0.41	0.23	0.16	0.13	0.21	0.41	0.07	0.38	0.45	0.2	0.31	0.41	0.63	0.6	0.25	0.23	0.53	0.26	0.41	0.15	0.15	0.24	0.16	0.69	0.17	0.08	0.25	0.21	0.21	0.48	0.18	0.14
23014@uc001twl.1@uc001twj.1uc001twk.1uc009zwq.1	AFE	0.0497799	NA	NA	0.57	0.52	0.56	0.54	0.59	0.47	NA	NA	0.55	NA	0.52	NA	0.3	0.44	NA	NA	NA	NA	0.54	0.46	0.42	NA	NA	0.52	0.33	0.42	0.43	0.46	NA	NA	NA
23032@uc001dhv.1@uc001dhu.1	AFE	0.0425842	0.84	0.77	0.69	0.62	0.58	0.51	0.5	0.04	0.72	0.79	0.55	0.75	0.63	0.8	0.69	0.53	0.38	0.84	0.65	0.61	0.76	0.44	0.55	0.63	0.44	0.48	0.11	0.52	0.49	0.61	0.72	0.62	0.43
23053@uc009xrk.1@uc001jvg.1	ALE	0.0202155	0.81	0.34	0.68	0.41	0.55	0.58	0.54	0.77	0.42	0.35	0.52	0.25	0.55	0.14	0.7	0.43	0.32	0.6	0.29	0.25	0.75	0.62	0.79	0.74	0.45	0.48	0.89	0.59	0.69	0.56	0.68	0.76	0.25
23061@uc003mlk.1@uc003mlg.1	AFE	0.0042471	NA	NA	NA	0.49	0.59	0.62	0.4	0.58	0.56	0.57	0.58	0.58	NA	0.62	NA	0.54	0.51	NA	NA	0.55	NA	0.43	0.37	0.53	NA	0.47	NA	0.5	0.48	0.47	NA	NA	NA
23075@uc001mhv.2@uc001mhw.1uc001mhx.1	ALE	0.0348283	0.86	0.89	0.89	0.89	0.84	0.9	0.86	0.88	0.86	0.83	0.92	0.94	0.92	0.96	0.82	0.94	0.85	0.74	0.87	0.94	0.96	0.95	0.95	0.87	0.94	0.87	0.85	0.94	0.9	0.97	0.94	0.91	0.87
23076@uc002zdl.1@uc002zdk.1	AFE	0.0445199	0.54	0.46	0.41	0.4	0.32	0.09	0.38	0.25	0.63	0.59	0.14	0.56	0.29	0.61	0.1	0.23	0.58	0.45	0.57	0.66	0.24	0.11	0.05	0.29	0.54	0.05	0.04	0.1	0.42	0.53	0.54	0.19	0.5
23077@uc010aew.1@uc010aev.1	AFE	0.0481055	0.34	0.36	0.21	0.3	0.2	0.28	0.24	0.08	0.31	0.26	0.24	0.28	0.32	0.36	0.42	0.3	0.26	0.31	0.31	0.31	0.28	0.21	0.22	0.26	0.42	0.22	0.24	0.25	0.29	0.25	0.27	0.2	0.21
2309@uc010kdj.1@uc003psk.2uc003psn.2	AFE	0.00479583	0.65	0.74	0.66	0.59	0.49	0.56	0.56	0.07	0.98	0.93	0.54	0.94	0.63	0.97	0.61	0.6	0.91	0.58	0.88	0.87	0.7	0.54	0.42	0.5	0.52	0.49	0.14	0.56	0.53	0.67	0.62	0.5	0.53
2309@uc010kdj.1@uc003psm.2	AFE	0.0462908	0.62	0.81	0.69	0.67	0.53	0.63	0.64	0.11	0.99	0.92	0.59	0.94	0.77	0.97	0.61	0.63	0.92	0.69	0.89	0.88	0.76	0.62	0.5	0.64	0.64	0.55	0.19	0.62	0.64	0.81	0.78	0.47	0.61
23091@uc001vaq.1@uc001vas.1	AFE	0.0369156	0.5	0.51	0.38	0.41	0.48	0.61	0.4	0.52	0.47	0.43	0.55	0.35	0.53	0.44	0.43	0.46	0.46	0.57	0.5	0.47	0.47	0.54	0.58	0.5	0.51	0.55	NA	0.58	0.54	0.47	0.6	0.52	0.4
23114@uc001hbk.1@uc001hbj.1	AFE	0.031746	NA	NA	NA	NA	0.48	NA	0.59	NA	NA	NA	0.63	NA	0.55	0.52	NA	NA	NA	NA	NA	NA	NA	NA	0.42	NA	NA	0.47	0.46	0.51	NA	NA	NA	NA	NA
23114@uc001hbn.1@uc001hbj.1	AFE	0.0268436	NA	NA	NA	NA	0.55	NA	0.46	NA	NA	NA	0.48	NA	0.47	0.34	NA	NA	NA	NA	NA	NA	NA	NA	0.56	NA	NA	0.62	0.67	0.55	NA	NA	NA	NA	NA
23125@uc010ckv.1@uc010cku.1uc002gag.1uc002gah.1uc002gai.1	ALE	0.042879	NA	0.52	0.62	0.68	0.7	0.57	0.65	0.54	0.79	0.73	0.82	0.72	0.55	0.33	0.58	0.64	0.67	NA	0.77	0.67	0.58	0.46	0.57	0.6	0.5	0.75	0.56	0.67	0.56	0.58	0.43	0.56	0.57
23132@uc003dbj.1@uc003dbi.2	AFE	0.00672254	0.57	0.36	0.62	0.34	0.28	0.32	0.59	0.66	0.51	0.21	0.44	0.34	0.48	0.29	0.5	0.45	0.47	0.43	0.62	0.42	0.61	0.34	0.68	0.58	0.63	0.62	0.76	0.44	0.65	0.5	0.67	0.71	0.39
23136@uc002kms.1@uc010dkq.1	AFE	0.00296452	0.15	0.14	0.17	0.19	0.14	0.14	0.18	0.16	0.02	0.07	0.17	0.11	0.29	0.02	0.03	0.19	0.08	0.13	0.03	0.1	0.21	0.18	0.2	0.13	0.23	0.21	0.24	0.15	0.15	0.19	0.29	0.32	0.13
23136@uc002kms.1@uc010dks.1	AFE	0.0400143	0.85	0.9	0.91	0.83	0.93	0.83	0.93	0.81	0.9	0.86	0.94	0.9	0.79	0.93	0.88	0.82	0.82	0.79	0.84	0.93	0.87	0.9	0.9	0.74	0.75	0.91	0.66	0.9	0.81	0.86	0.76	0.73	0.77
23139@uc001cox.1@uc001cov.1uc001cow.1	ALE	0.0303619	0.5	0.56	0.54	0.52	0.52	0.57	0.5	0.54	0.52	0.66	0.52	0.41	0.54	0.54	0.62	0.53	0.58	0.47	0.54	0.62	0.37	0.5	0.55	0.5	0.36	0.57	0.55	0.52	0.46	0.53	0.51	0.44	0.46
23139@uc009vya.1@uc001coy.1	ALE	0.0380606	NA	NA	NA	0.11	0.04	0.23	0.14	0.13	0.12	0.07	0.08	0.23	0.28	0.07	0.25	0.27	0.13	0.1	0.62	0.06	0.2	0.26	0.15	0.39	0.33	0.1	0.07	0.13	0.2	0.32	0.34	0.55	0.36
23189@uc010mgx.1@uc003zgq.2	AFE	0.0211638	0.26	0.53	0.36	0.3	0.4	0.34	0.34	0.2	0.15	0.33	0.26	0.59	0.46	0.33	0.36	0.37	0.63	0.53	0.61	0.2	0.08	0.23	0.37	0.32	0.59	0.19	0.16	0.2	0.29	0.29	0.43	0.1	0.11
23189@uc010mgx.1@uc003zgr.1	AFE	0.00881942	0.35	0.49	0.4	0.35	0.41	0.32	0.33	0.28	0.15	0.31	0.28	0.59	0.41	0.33	0.37	0.39	0.78	0.53	0.63	0.19	0.11	0.24	0.32	0.34	0.51	0.19	0.15	0.22	0.28	0.31	0.44	0.09	0.15
23189@uc010mgx.1@uc003zgs.1	AFE	0.00568187	0.23	0.66	0.29	0.35	0.43	0.26	0.34	0.39	0.17	0.36	0.26	0.62	0.46	0.35	0.35	0.42	0.57	0.43	0.66	0.17	0.09	0.24	0.34	0.27	0.55	0.19	0.2	0.21	0.3	0.32	0.3	0.08	0.13
23192@uc002wbx.1@uc003bod.2	AFE	0.0135794	0.38	0.18	0.13	NA	0.09	0.11	0.09	NA	0.07	0.27	0.04	0.14	NA	0.17	NA	0.13	0.13	NA	0.23	0.15	NA	0.21	0.17	0.33	0.34	0.16	0.54	0.08	0.22	0.2	0.34	0.39	NA
23192@uc002wbx.1@uc003boe.1uc003bof.1uc010hbm.1	AFE	0.0153975	0.51	0.55	0.6	NA	0.52	0.52	0.51	NA	0.56	0.56	0.58	0.52	NA	0.62	NA	0.49	0.49	NA	0.44	0.49	NA	0.56	0.53	0.33	0.41	0.48	0.51	0.39	0.52	0.36	0.47	0.47	NA
23192@uc002wby.1@uc002wbx.1	AFE	0.0189162	0.23	0.2	0.22	NA	0.17	0.09	0.14	NA	0.09	0.36	0.1	0.12	0.6	0.2	NA	0.16	0.11	NA	0.16	0.11	NA	0.2	0.29	0.3	0.32	0.14	0.35	0.19	0.26	0.18	0.25	0.36	NA
23200@uc010hxf.1@uc003flc.2	AFE	0.00803372	0.63	0.42	0.5	0.4	0.76	0.65	0.81	NA	0.57	0.68	0.6	0.38	0.41	0.76	0.65	0.61	0.54	0.54	0.62	0.63	0.52	0.43	0.36	0.41	0.17	0.42	0.62	0.4	0.28	0.48	0.65	0.48	0.52
23218@uc003cqq.1@uc003cqp.2uc010hjm.1uc010hjn.1uc010hjo.1	ALE	0.0192448	0.43	0.51	0.58	0.38	0.26	0.39	0.41	0.12	0.84	0.92	0.31	0.86	0.56	0.83	0.31	0.36	0.79	0.36	0.52	0.67	0.55	0.24	0.39	0.26	0.44	0.44	0.16	0.32	0.16	0.13	0.27	0.25	0.62
23224@uc001xgp.2@uc001xgk.2uc001xgl.1uc001xgm.1	AFE	0.023607	0.61	0.58	NA	0.47	0.58	0.59	0.26	0.41	NA	0.51	0.43	0.62	0.57	NA	0.63	0.53	NA	NA	NA	NA	0.5	0.53	0.5	0.4	0.36	0.48	0.35	0.47	0.46	0.41	0.47	NA	NA
23242@uc003tpo.2@uc003tpq.2uc003tps.1	AFE	0.0272823	0.06	0.22	0.44	0.5	0.15	0.42	0.46	NA	0.3	0.2	0.02	0.58	0.2	0.02	0.57	0.09	0.51	0.47	0.15	0.1	0.49	0.52	0.21	0.51	0.48	0.08	0.4	0.28	0.61	0.55	0.53	0.52	0.49
23242@uc003tpp.2@uc003tpq.2uc003tps.1	AFE	0.0128465	0.1	0.32	0.33	0.44	0.29	0.46	0.55	0.58	0.32	0.27	0.09	0.5	0.25	0.11	0.5	0.07	0.51	0.49	0.15	0.15	0.52	0.59	0.23	0.57	0.45	0.19	0.38	0.36	0.63	0.62	0.56	0.49	0.55
23243@uc003cai.1@uc003caj.1	AFE	0.024475	NA	0.61	0.44	0.48	0.56	0.54	0.58	NA	0.48	NA	0.68	NA	0.51	0.48	NA	0.69	0.62	NA	NA	NA	0.59	0.5	0.48	0.44	NA	0.44	NA	0.42	0.54	0.47	0.3	NA	NA
23245@uc004bjv.1@uc004bjo.1uc004bjp.1uc004bjr.1uc004bjs.1uc004bjt.1	ALE	0.0422851	NA	0.62	0.57	0.59	0.5	0.56	0.54	NA	0.57	0.57	0.35	0.56	0.55	0.59	NA	0.62	0.49	NA	0.39	NA	NA	0.56	0.46	0.52	NA	0.48	0.52	0.42	0.51	0.51	0.57	0.36	0.5
23269@uc001zoi.2@uc001zog.1	AFE	0.0483875	0.39	0.72	0.73	0.36	0.72	0.89	0.54	0.48	0.76	0.56	0.55	0.46	0.58	0.67	0.63	0.67	0.55	0.6	0.65	0.71	0.75	0.7	0.58	0.67	0.69	0.85	0.7	0.73	0.76	0.73	0.76	0.56	0.53
23301@uc002sca.2@uc010fcq.1	ALE	0.0436852	0.59	0.58	NA	0.33	0.26	0.63	0.48	0.61	0.56	NA	0.66	0.64	NA	NA	NA	0.64	NA	NA	NA	NA	0.33	0.32	NA	NA	0.42	0.57	NA	0.14	0.27	0.64	NA	0.38	0.37
23301@uc010fcq.1@uc002sbx.2	ALE	0.0156014	NA	NA	NA	0.3	0.3	NA	0.14	NA	NA	NA	0.07	NA	NA	NA	NA	0.05	NA	NA	NA	0.26	0.57	0.32	0.35	NA	0.6	NA	NA	0.53	0.23	NA	0.16	0.4	0.45
23314@uc002uvb.1@uc002uuz.1	AFE	0.00640628	0.59	0.66	0.6	0.69	0.13	0.2	0.15	NA	0.74	0.41	0.12	0.59	0.22	0.7	0.58	0.21	0.39	0.58	0.59	0.68	0.25	0.13	0.38	0.17	0.35	0.09	0.01	0.21	0.4	0.42	0.3	0.14	0.14
23314@uc002uvb.1@uc002uva.1	AFE	0.00903319	0.57	0.64	0.68	0.82	0.27	0.53	0.38	NA	0.67	0.52	0.34	0.66	0.49	0.89	0.65	0.4	0.53	0.7	0.67	0.78	0.44	0.26	0.6	0.35	0.64	0.25	0.03	0.41	0.6	0.61	0.49	0.34	0.38
23314@uc002uvb.1@uc010fsq.1	AFE	0.00896372	0.46	0.4	0.46	0.63	0.08	0.14	0.15	NA	0.63	0.58	0.09	0.59	0.59	0.57	0.38	0.45	0.59	0.44	0.69	0.58	0.07	0.09	0.27	0.57	0.53	0.06	0.02	0.09	0.53	0.4	0.58	0.05	0.07
23314@uc002uvb.1@uc010fsq.1uc002uuy.1uc002uuz.1uc002uva.1	ALE	0.00263146	0.81	0.78	0.77	0.72	0.85	0.68	0.81	0.83	0.75	0.79	0.88	0.82	0.83	0.56	0.72	0.73	0.74	0.45	0.74	0.72	0.84	0.85	0.88	0.91	0.71	0.85	0.95	0.73	0.77	0.85	0.87	0.89	0.9
23326@uc002gym.2@uc002gyl.2	AFE	0.0222298	0.53	0.25	0.57	0.66	0.13	0.34	0.18	0.08	0.78	0.78	0.2	0.78	0.23	0.8	0.3	0.25	0.7	0.15	0.68	0.71	0.38	0.12	0.11	0.45	0.18	0.14	0.03	0.16	0.41	0.15	0.25	0.3	0.33
23327@uc002lhc.1uc002lhe.1@uc002lgx.1uc002lgy.1uc002lgz.1	AFE	0.0343875	NA	0.53	NA	0.56	0.57	0.51	0.56	NA	0.42	NA	0.42	NA	0.63	0.48	NA	0.61	NA	NA	NA	NA	0.42	0.52	NA	NA	NA	0.47	NA	0.47	0.49	0.42	0.42	0.47	NA
23327@uc002lhd.1@uc002lgx.1uc002lgy.1uc002lgz.1	AFE	0.0244303	0.48	0.43	0.44	0.55	0.53	0.45	0.4	0.44	0.55	0.5	0.39	0.46	0.41	0.46	0.67	0.48	0.57	0.51	0.63	0.49	0.55	0.58	0.49	0.57	0.51	0.56	0.56	0.53	0.31	0.66	0.6	0.49	0.62
23332@uc002tmy.1@uc002tnf.1	AFE	0.0150246	NA	NA	0.45	0.6	0.61	NA	0.47	NA	NA	NA	0.67	0.6	NA	0.61	NA	0.56	0.53	0.62	NA	0.57	0.38	0.34	0.54	0.19	NA	0.58	NA	0.44	0.32	0.19	0.65	0.48	NA
23345@uc003qov.2@uc010kiz.1	ALE	0.0277998	NA	NA	NA	0.64	0.54	NA	0.61	NA	0.65	NA	0.63	NA	NA	NA	NA	0.54	NA	0.46	NA	NA	NA	0.26	0.57	NA	NA	0.3	0.24	NA	0.46	NA	NA	NA	NA
23345@uc003qov.2@uc010kja.1	ALE	0.036904	NA	NA	NA	0.69	0.58	0.53	0.65	NA	NA	0.64	0.63	NA	NA	NA	NA	0.57	NA	0.61	NA	NA	NA	0.27	0.64	0.62	NA	0.27	0.38	0.52	0.41	NA	NA	NA	NA
23345@uc010kiz.1@uc003qot.2	AFE	0.00870487	NA	NA	0.29	0.6	0.43	0.57	0.4	0.51	NA	NA	0.15	NA	0.46	0.36	NA	0.41	0.6	NA	NA	0.68	0.18	0.19	0.45	NA	NA	0.11	NA	0.15	0.26	0.26	NA	NA	NA
23345@uc010kiz.1@uc010kjb.1	AFE	0.0449078	NA	NA	0.32	0.74	0.37	NA	0.32	NA	NA	NA	0.16	NA	0.53	0.43	NA	0.23	0.49	NA	NA	0.7	0.17	0.22	0.4	NA	NA	0.07	NA	0.25	0.28	0.32	NA	NA	NA
23345@uc010kja.1@uc003qot.2	AFE	0.0267549	0.58	0.57	0.58	0.46	0.68	0.53	0.69	0.13	0.67	0.63	0.62	0.64	0.44	0.19	0.63	0.87	0.58	0.63	0.42	0.29	0.59	0.71	0.47	0.64	0.7	0.8	0.68	0.69	0.57	0.64	0.68	0.63	0.61
23345@uc010kjb.1@uc003qov.2	ALE	0.00865801	NA	NA	NA	0.64	0.63	0.67	0.55	NA	NA	NA	0.73	NA	NA	NA	NA	NA	NA	NA	NA	NA	NA	0.39	0.47	NA	NA	0.33	0.28	NA	0.29	0.59	NA	NA	NA
23348@uc001vnq.1@uc001vnr.1	AFE	0.021142	NA	0.62	NA	0.62	0.74	0.47	0.58	NA	0.51	0.66	0.65	0.59	0.74	0.5	0.34	0.63	0.63	0.5	0.76	0.51	0.28	0.58	0.5	0.62	0.33	0.88	0.47	0.61	0.52	0.38	0.33	0.49	0.41
23348@uc001vnq.1@uc010afu.1	AFE	0.0353399	NA	0.49	0.14	0.49	0.6	0.58	0.61	NA	0.57	0.47	0.09	0.51	0.56	0.58	0.43	0.18	0.46	0.52	0.56	0.58	0.23	0.28	0.24	0.51	0.21	0.09	0.52	0.16	0.48	0.32	0.49	0.57	0.22
23348@uc001vnr.1@uc010afu.1	AFE	0.0122469	NA	NA	0.24	0.47	0.55	0.54	0.61	NA	0.58	0.64	0.06	0.57	0.61	0.49	0.55	0.2	0.43	0.55	0.49	0.48	0.17	0.21	0.34	NA	0.3	0.06	0.52	0.17	0.54	0.25	0.52	0.44	0.32
23348@uc001vns.1@uc010afu.1	AFE	0.0237117	NA	0.46	0.19	0.52	0.43	0.58	0.56	NA	0.59	0.43	0.06	0.52	0.56	NA	NA	0.14	0.48	0.57	0.55	0.52	0.31	0.32	0.32	0.48	0.3	0.1	0.5	0.13	0.41	0.22	0.55	0.44	0.32
23348@uc001vnu.1@uc010afu.1	AFE	0.0202107	NA	0.38	0.19	0.44	0.47	0.58	0.54	0.49	0.52	0.6	0.13	0.53	0.53	0.57	0.68	0.14	0.69	0.73	0.6	0.57	0.26	0.22	0.32	0.47	0.2	0.08	0.48	0.18	0.42	0.28	0.55	0.61	0.28
23350@uc003evl.1@uc003evi.1	AFE	0.02934	0.14	0.26	0.09	0.23	0.12	0.13	0.13	0.2	0.16	0.07	0.07	0.1	0.22	0.12	0.27	0.12	0.15	0.37	0.31	0.08	0.11	0.09	0.14	0.07	0.12	0.1	0.03	0.17	0.25	0.06	0.07	0.11	0.1
23363@uc002vmh.1uc010fwl.1@uc010fwk.1	ALE	0.0490901	NA	NA	NA	NA	0.46	NA	0.54	NA	NA	NA	0.55	NA	NA	NA	NA	0.56	NA	NA	NA	NA	NA	0.5	0.43	NA	NA	0.35	NA	0.46	0.42	NA	NA	NA	NA
23369@uc002rdq.1@uc002rds.1	AFE	0.0499907	0.48	NA	NA	0.48	0.56	NA	0.46	NA	NA	NA	0.67	NA	0.46	0.45	NA	NA	NA	NA	0.53	NA	NA	0.62	NA	NA	NA	0.59	NA	0.61	NA	0.58	NA	NA	NA
23371@uc001sbs.1@uc001sbm.2uc001sbn.1	AFE	0.0239106	NA	0.46	NA	0.5	0.57	0.59	0.48	0.58	0.21	0.33	0.49	0.56	0.31	0.62	NA	0.46	0.58	0.49	0.52	0.5	NA	0.54	0.6	0.63	NA	0.62	0.53	0.64	NA	0.49	NA	NA	NA
23387@uc001ppw.1@uc001ppy.1uc001pqa.1	AFE	0.00876321	0.42	0.41	0.42	0.56	0.52	0.48	0.48	NA	0.41	0.45	0.53	0.46	0.54	0.55	0.44	0.42	0.36	0.52	0.41	0.5	0.53	0.47	0.48	NA	0.57	0.53	NA	0.51	0.66	0.6	0.49	NA	0.56
23387@uc001pqb.1@uc001ppz.1	AFE	0.0120229	0.51	0.54	0.48	0.57	0.56	0.45	0.55	0.57	0.54	0.59	0.54	0.62	0.61	0.47	0.53	0.61	0.53	0.52	0.35	0.59	0.48	0.49	0.45	0.51	0.42	0.32	0.53	0.51	0.47	0.32	0.52	0.61	0.54
23461@uc002jih.1@uc002jib.1uc002jic.1uc002jid.1uc002jif.1uc002jig.1	ALE	0.0249421	0.33	0.48	0.54	0.2	0.44	0.43	0.46	0.65	0.43	0.42	0.45	0.58	0.41	0.52	0.54	0.52	0.48	0.42	0.47	0.42	0.51	0.54	0.56	0.42	0.68	0.58	NA	0.51	0.53	0.55	0.39	0.57	0.55
23469@uc003peo.2@uc010kaf.1uc003pem.2	ALE	0.0461079	0.46	0.4	0.48	0.51	0.47	0.58	0.46	0.33	0.48	0.56	0.35	0.41	0.47	0.59	0.48	0.54	0.49	0.43	0.44	0.66	0.46	0.58	0.59	0.57	0.48	0.52	0.51	0.64	0.46	0.56	0.6	0.58	0.43
23469@uc003peo.2@uc010kag.1	ALE	0.0441282	0.43	0.52	0.5	0.49	0.48	0.55	0.58	0.64	0.49	0.41	0.57	0.58	0.48	0.5	0.45	0.54	0.44	0.44	0.4	0.49	0.5	0.57	0.49	0.47	0.6	0.53	0.62	0.57	0.51	0.63	0.5	0.54	0.53
23499@uc001cdh.2@uc001cdb.1uc001cdc.1	AFE	0.00245739	0.46	0.53	0.49	0.52	0.48	0.54	0.44	0.49	0.54	0.59	0.49	0.51	0.42	0.59	0.56	0.63	0.39	0.56	0.53	0.52	0.46	0.47	0.49	0.39	0.44	0.47	0.42	0.57	0.46	0.46	0.4	0.36	0.38
23503@uc001xkc.2@uc001xkb.2	ALE	0.0454881	NA	0.55	NA	0.47	0.37	NA	0.42	NA	0.53	NA	0.73	0.27	0.45	0.5	0.34	0.55	0.66	0.61	NA	0.24	NA	0.71	NA	0.54	0.71	0.44	0.5	0.73	0.87	0.63	0.63	0.56	0.38
23506@uc003oso.1@uc003osn.1uc003osp.1	ALE	0.0484251	0.26	0.42	0.53	0.47	0.35	0.37	0.47	0.75	0.31	0.41	0.4	0.34	0.48	0.31	0.54	0.31	0.37	0.37	0.25	0.42	0.43	0.27	0.41	0.52	0.4	0.5	0.55	0.36	0.44	0.62	0.47	0.61	0.57
23616@uc003atk.1@uc003ath.1uc003ati.1	AFE	0.0230717	0.47	0.39	0.27	0.66	0.38	0.58	0.25	0.08	0.56	0.51	0.14	0.71	0.33	0.78	0.51	0.45	0.82	NA	0.85	0.7	NA	0.37	0.15	0.37	0.65	0.3	0.15	0.35	0.43	0.31	0.3	0.24	0.33
23623@uc001fkr.2@uc001fkj.2uc001fkk.2	AFE	0.0237513	NA	0.53	NA	0.33	0.6	0.29	0.71	0.54	0.36	0.47	0.66	0.52	NA	0.41	NA	0.27	0.58	NA	0.61	0.34	0.59	0.41	0.82	0.61	NA	0.52	0.68	0.66	0.61	0.56	0.59	0.68	NA
23659@uc002evs.1@uc002evr.1	AFE	0.0357701	NA	NA	NA	NA	NA	NA	NA	0.52	0.48	0.4	0.39	NA	NA	NA	NA	0.4	NA	NA	NA	NA	NA	0.63	NA	NA	NA	NA	NA	0.58	NA	NA	NA	NA	0.67
25@uc004bzw.1@uc004bzv.1	AFE	0.0337872	0.6	0.54	0.49	0.45	0.46	0.56	0.29	0.48	0.53	0.57	0.61	0.46	0.51	0.54	0.56	0.67	0.63	0.39	0.66	0.54	0.37	0.57	0.43	0.51	0.42	0.43	0.54	0.56	0.55	0.38	0.42	0.45	0.43
2534@uc010kdy.1@uc003pvi.1	AFE	0.00113917	0.58	0.5	NA	0.53	0.44	0.43	0.36	NA	NA	NA	0.4	0.56	0.54	0.59	NA	0.51	0.55	NA	NA	0.51	NA	0.6	0.68	0.6	0.58	NA	NA	0.62	0.6	NA	NA	NA	NA
254048@uc003vuv.2@uc003vuu.2	ALE	0.027693	0.74	0.85	0.88	0.91	0.89	0.89	0.89	0.74	0.78	0.95	0.94	0.92	0.86	0.91	0.81	0.87	0.76	0.86	0.86	0.82	0.86	0.91	0.94	0.89	0.86	0.92	0.83	0.87	0.93	0.94	0.93	0.93	0.94
254065@uc004edo.2@uc004edt.2	AFE	0.0445377	0.63	0.18	0.53	0.62	0.69	0.61	0.5	0.67	0.66	0.65	0.47	0.73	0.34	0.45	0.17	0.29	0.66	0.61	0.41	0.6	0.15	0.36	0.48	0.33	0.46	0.47	0.29	0.54	0.34	0.24	0.4	0.55	0.69
254065@uc004edp.2@uc004edt.2	AFE	0.0174343	0.47	0.1	0.41	0.56	0.77	0.68	0.45	0.55	0.64	0.63	0.38	0.67	0.46	0.4	0.14	0.17	0.67	0.51	0.39	0.68	0.23	0.28	0.41	0.33	0.32	0.44	0.32	0.42	0.22	0.24	0.3	0.45	0.6
254065@uc004edq.2@uc004edt.2	AFE	0.0407031	0.58	0.12	0.45	0.54	0.74	0.71	0.48	0.66	0.58	0.75	0.39	0.77	0.28	0.39	0.13	0.18	0.69	0.48	0.38	0.53	0.15	0.29	0.48	0.28	0.37	0.43	0.42	0.47	0.18	0.13	0.24	0.45	0.68
254827@uc010hwy.1@uc003fit.1	ALE	0.0368485	0.54	0.58	0.52	0.42	0.5	0.38	0.63	0.59	0.45	0.43	0.52	0.49	0.58	0.55	0.43	0.59	0.47	0.48	0.52	0.58	0.66	0.58	0.59	0.54	0.63	0.48	0.59	0.57	0.66	0.54	0.49	0.44	0.6
255104@uc001bcq.1@uc001bco.1uc001bcp.1	ALE	0.0180655	NA	0.44	0.44	0.46	0.59	0.52	0.34	0.65	0.53	0.57	0.68	0.53	0.43	0.53	0.58	0.4	0.45	0.48	0.46	0.49	0.41	0.42	0.5	0.44	0.44	0.39	0.36	0.32	0.49	0.46	0.4	0.45	0.54
25778@uc001hby.1@uc001hbw.1uc001hbx.1	AFE	0.0196244	NA	NA	NA	NA	0.14	0.24	0.18	NA	NA	NA	0.15	NA	NA	NA	NA	0.14	NA	NA	NA	NA	NA	0.2	0.38	NA	NA	0.35	NA	0.35	NA	0.35	NA	NA	NA
25793@uc003amp.1@uc02683.uc003amv.1	ALE	0.0301107	0.04	0.07	0.03	0.08	0.04	0.05	0.06	0.08	0.03	0.01	0.02	0.01	0.07	0.04	0.07	0.03	0.03	0.17	0.05	0.03	0.06	0.03	0.04	0.06	0.1	0.06	0.13	0.08	0.1	0.02	0.11	0.09	0.08
2580@uc010ibi.1@uc003gbm.2uc003gbn.2uc010ibk.1	AFE	0.0211421	0.51	0.68	0.65	0.51	0.46	0.42	0.59	0.42	0.93	0.92	0.59	0.87	0.49	0.87	0.63	0.67	0.92	0.64	0.87	0.9	0.64	0.54	0.56	0.39	0.66	0.5	0.47	0.54	0.54	0.46	0.6	0.45	0.48
2581@uc001xvu.1@uc001xvt.1	ALE	0.0462908	0.48	0.73	0.67	0.57	0.52	0.49	0.54	0.49	0.57	0.55	0.62	0.45	0.53	0.47	0.61	0.43	0.51	0.66	0.59	0.56	0.56	0.58	0.48	0.41	0.51	0.45	0.51	0.47	0.6	0.51	0.44	0.46	0.49
2582@uc001bia.1@uc001bhz.1	AFE	0.0378342	NA	0.56	0.42	0.39	0.65	0.44	0.46	0.54	0.63	0.65	0.68	0.6	0.57	0.62	NA	0.55	0.53	0.51	0.61	0.55	0.36	0.51	0.51	0.5	0.41	0.45	0.39	0.64	0.42	0.59	0.59	NA	0.44
25865@uc002pfd.1@uc002pfh.1	AFE	0.0107225	0.51	0.48	NA	0.5	0.6	0.54	0.6	NA	0.51	NA	0.42	0.59	0.54	NA	0.63	0.67	NA	NA	NA	NA	0.44	0.51	0.44	0.44	0.48	0.42	0.51	0.58	0.43	0.32	NA	NA	NA
25865@uc002pfe.1uc002pff.1@uc002pfh.1	AFE	0.0371239	0.52	0.44	0.22	0.32	0.34	0.23	0.24	0.14	0.24	0.11	0.14	0.2	0.45	NA	0.33	0.22	0.06	NA	0.11	0.07	0.26	0.26	0.31	0.54	0.43	0.45	0.26	0.28	0.38	0.42	0.38	0.27	0.11
25890@uc003duo.1@uc003duj.1uc003duk.1uc003dul.1uc003dum.1uc003dun.1	ALE	0.0382559	0.73	0.87	0.78	0.94	0.97	0.92	0.92	0.62	0.71	0.89	0.96	0.86	0.96	0.81	0.9	0.94	0.91	0.88	0.87	0.91	0.95	0.96	0.96	0.94	0.9	0.95	0.8	0.96	0.93	0.95	0.91	0.91	0.91
25906@uc001orv.2@uc009ytc.1	ALE	0.0194673	NA	NA	0.05	0.01	0.02	0.01	0.02	NA	0.01	0.02	0.01	0.01	0.01	0.01	NA	0.01	0	NA	0.02	0	0.04	0.01	0.05	0.01	NA	0.04	0.19	0.02	0.04	0	NA	0.2	0.11
25906@uc001orw.1@uc009ytc.1	ALE	0.0127272	NA	NA	0.05	0.01	0.01	0.01	0.02	NA	0.01	0.02	0.01	0.01	0.01	0.01	NA	0.01	0	NA	0.02	0.01	0.05	0.01	0.04	0.03	NA	0.05	0.2	0.01	0.04	0	NA	0.12	0.12
259307@uc002pqt.1@uc010eno.1	AFE	0.0143419	NA	NA	0.58	0.62	0.53	0.51	0.57	NA	0.6	0.41	0.53	0.53	0.53	0.33	NA	0.5	NA	NA	0.5	0.51	NA	0.47	0.45	0.32	0.48	0.49	0.47	0.56	0.46	0.35	0.4	0.55	0.43
25959@uc002mqp.1@uc010dxv.1	AFE	0.0149527	0.72	0.58	0.45	0.51	0.64	0.49	0.67	0.67	0.71	0.56	0.61	0.1	0.36	0.16	0.73	0.38	0.54	0.42	0.65	0.33	0.57	0.45	0.77	0.81	0.36	0.77	0.7	0.49	0.7	0.74	0.68	0.8	0.7
25994@uc010hid.1@uc003cma.2	AFE	0.0178336	NA	NA	NA	NA	0.29	0.16	0.2	NA	NA	NA	0.07	NA	0.3	NA	NA	0.21	NA	NA	0.21	NA	NA	0.44	0.22	NA	0.52	0.29	NA	0.39	NA	0.33	NA	NA	0.23
26000@uc002dxt.2@uc002dxu.2	AFE	0.0407536	0.62	0.57	0.34	0.43	0.35	0.53	0.32	0.23	0.44	0.51	0.34	0.59	0.6	0.4	0.5	0.36	0.5	0.54	0.45	0.54	0.37	0.33	0.35	0.39	0.66	0.26	0.2	0.39	0.49	0.37	0.36	0.22	0.41
26015@uc001zoc.1@uc001zod.1	AFE	0.0456421	0.12	NA	0.1	0.13	0.17	0.06	0.07	0.54	0.08	0.36	0.07	0.09	0.13	0.14	NA	0.15	NA	NA	0.33	0.18	0.22	0.03	0.14	NA	0.28	0.08	0.5	0.15	0.47	0.59	0.36	0.4	0.36
26033@uc001lcf.1uc009xyq.1@uc001lcg.1	ALE	0.0482071	NA	NA	0.49	0.5	0.52	0.6	0.41	NA	NA	0.13	0.46	0.03	0.46	0.48	0.52	0.62	0.24	NA	NA	NA	0.66	0.64	0.45	NA	0.66	0.66	NA	0.56	0.4	NA	0.52	NA	0.5
26090@uc002wus.1uc002wut.1uc002wuu.1@uc002wuq.1uc002wur.1	ALE	0.0233305	0.45	0.53	0.57	0.51	0.67	0.43	0.43	0.72	0.75	0.71	0.32	0.61	0.83	0.88	0.55	0.33	0.6	0.51	0.77	0.39	0.35	0.52	0.24	0.46	0.24	0.51	0.44	0.47	0.64	0.62	0.33	0.39	0.43
26112@uc010jht.1@uc010jhu.1	AFE	0.0295443	0.15	0.1	0.08	0.04	0.05	0.06	0.03	0.12	0.07	0.14	0.08	0.04	0.06	0.07	0.16	0.01	0.06	0.66	0.12	0.31	0.04	0.02	0.04	0.15	0.04	0.04	NA	0.05	0.06	0.03	0.06	0.07	0.06
26136@uc010lka.1uc003vhp.1@uc003vho.1	AFE	0.011412	NA	NA	NA	NA	0.54	0.5	0.5	NA	NA	NA	0.55	NA	NA	NA	NA	0.66	NA	NA	NA	NA	NA	0.39	0.39	NA	NA	0.43	NA	NA	NA	NA	0.43	NA	0.48
26148@uc001kmv.1@uc001kmr.2uc001kms.1uc009xvg.1	AFE	0.0120804	0.29	0.22	0.32	0.4	0.48	0.29	0.37	0.36	0.48	0.28	0.4	0.29	0.33	0.41	0.32	0.46	0.41	0.34	0.35	0.35	0.32	0.39	0.45	0.45	0.42	0.43	0.53	0.41	0.38	0.4	0.52	0.36	0.42
26249@uc003lbr.2@uc010jek.1uc010jem.1	AFE	0.0319353	NA	NA	0.7	0.65	NA	0.38	0.44	NA	0.52	NA	0.55	0.42	0.44	0.74	NA	NA	NA	NA	NA	0.39	NA	0.4	0.32	NA	NA	0.47	NA	NA	NA	0.28	NA	0.21	NA
26249@uc010jem.1@uc003lbr.2uc010jek.1	ALE	0.0103004	0.56	0.48	0.54	0.44	0.51	0.46	0.38	0.46	0.51	0.49	0.48	0.54	0.53	0.53	0.5	0.43	0.48	0.53	0.54	0.38	0.63	0.71	0.59	0.55	0.41	0.48	0.49	0.58	0.62	0.63	0.67	0.61	0.39
2651@uc003mze.1@uc010jol.1	AFE	0.0181736	0.56	NA	0.6	0.36	0.5	0.69	0.58	0.55	0.72	0.67	0.54	NA	0.64	0.55	0.51	0.54	0.37	NA	0.58	0.45	0.63	0.74	0.6	NA	NA	0.63	NA	0.61	0.59	NA	0.64	NA	0.68
2651@uc010jon.1@uc010jol.1uc010joo.1uc003mzc.2uc003mzd.1uc003mze.1	ALE	0.0461994	0.56	0.5	0.65	0.63	0.62	0.53	0.58	0.25	0.46	0.55	0.56	0.54	0.6	0.53	0.67	0.53	0.51	0.54	0.55	0.54	0.56	0.61	0.53	0.84	0.72	0.55	0.28	0.52	0.69	0.75	0.87	0.62	0.63
27@uc009wxf.1uc001gmk.2@uc009wxe.1	ALE	0.0412093	NA	NA	NA	0.54	0.54	0.62	0.61	NA	0.55	NA	0.58	NA	NA	0.48	NA	NA	0.54	NA	0.54	NA	NA	0.34	0.54	NA	NA	0.6	NA	0.3	0.49	NA	0.28	NA	0.53
27032@uc003enk.1uc01174.uc003ent.1	ALE	0.0305437	0.61	0.78	0.52	0.68	0.63	0.58	0.72	0.46	0.53	0.63	0.66	0.51	0.69	0.69	0.67	0.61	0.49	0.73	0.69	0.47	0.68	0.69	0.58	0.89	0.51	0.69	0.64	0.79	0.67	0.7	0.78	0.76	0.69
27037@uc002zrm.1@uc002zrk.1	AFE	0.0315972	NA	0.7	0.64	0.58	0.67	0.66	0.58	0.24	0.57	0.59	0.65	0.7	0.65	0.6	NA	0.5	0.68	NA	0.54	0.61	0.57	0.44	0.63	0.42	NA	0.64	0.33	0.61	0.43	0.67	0.47	0.56	0.35
27134@uc002lyk.1@uc002lyl.1	AFE	0.00126472	NA	NA	0.34	0.37	0.5	0.54	0.44	0.41	0.39	0.48	0.48	0.41	NA	0.49	NA	0.5	NA	NA	0.48	0.48	NA	0.55	0.63	0.56	NA	0.49	0.64	0.59	0.63	0.67	NA	0.46	NA
27145@uc003pib.1@uc003phy.1uc003pia.1	AFE	0.0103964	0.59	0.42	0.45	0.38	0.35	0.47	0.28	0.15	0.34	0.11	0.34	0.47	0.48	0.39	0.52	0.49	0.29	0.52	0.68	0.8	0.55	0.52	0.59	0.69	0.5	0.36	0.66	0.54	0.46	0.77	0.68	0.37	0.61
27145@uc003pib.1@uc010kbe.1	AFE	0.0182372	0.62	0.41	0.35	0.68	0.39	0.78	0.41	0.2	0.52	0.12	0.48	0.64	0.65	0.74	0.68	0.63	0.36	0.5	0.7	0.64	0.66	0.79	0.78	0.63	0.67	0.35	0.66	0.73	0.78	0.7	0.68	0.49	0.69
27185@uc001hvc.2@uc001hux.1uc001huy.1uc001huz.1uc001hva.1	AFE	0.049754	NA	NA	0.41	0.54	0.55	0.53	0.47	0.47	0.51	0.44	0.53	0.6	0.48	0.57	0.66	0.29	0.57	NA	0.68	0.54	NA	0.49	0.47	NA	0.53	0.48	0.52	0.45	0.49	0.43	NA	0.45	0.36
27239@uc001qqy.1@uc001qqx.1	AFE	0.049746	NA	NA	NA	NA	NA	NA	0.22	NA	NA	NA	0.24	NA	NA	NA	NA	0.31	0.31	NA	NA	NA	NA	0.46	NA	NA	NA	0.47	NA	0.35	NA	NA	NA	NA	NA
27332@uc002sid.1@uc002shw.2uc002shy.1	AFE	0.0308522	0.46	0.54	0.45	0.48	0.56	0.59	0.52	0.39	0.61	0.62	0.53	0.67	0.53	0.63	0.51	0.59	0.59	0.52	0.61	0.68	0.41	0.51	0.57	0.38	0.54	0.51	0.32	0.54	0.49	0.5	0.53	0.57	0.5
27332@uc002sid.1@uc002sia.1	AFE	0.0323272	0.38	0.47	0.39	0.43	0.48	0.52	0.45	0.26	0.56	0.56	0.45	0.6	0.46	0.57	0.46	0.52	0.54	0.5	0.54	0.61	0.36	0.43	0.5	0.34	0.48	0.45	0.28	0.47	0.44	0.44	0.46	0.53	0.43
27332@uc002sid.1@uc002sib.1	AFE	0.0338171	0.46	0.54	0.47	0.49	0.56	0.59	0.51	0.3	0.62	0.63	0.52	0.67	0.53	0.64	0.54	0.59	0.6	0.53	0.6	0.67	0.43	0.5	0.56	0.4	0.55	0.52	0.33	0.54	0.5	0.51	0.52	0.59	0.5
27343@uc001kte.1@uc001ktj.1uc001ktf.2uc001ktk.1	AFE	0.0157286	NA	0.49	0.34	0.64	0.39	0.38	0.57	NA	0.55	0.27	0.48	0.3	0.38	0.24	0.42	0.47	0.3	0.61	0.29	0.64	0.35	0.43	0.55	0.48	0.61	0.7	NA	0.57	0.74	0.42	0.62	0.69	0.59
27343@uc001kte.1@uc001ktm.1	AFE	0.0067296	NA	0.37	NA	0.47	0.42	0.51	0.6	NA	0.5	0.5	0.5	NA	0.61	0.57	0.46	0.6	NA	0.55	0.55	0.53	NA	0.51	0.35	0.47	0.5	0.38	NA	0.29	0.44	0.5	0.41	0.48	0.16
27434@uc003tjz.2@uc003tjt.1uc003tju.1	ALE	0.0324577	0.56	0.59	0.58	0.88	0.73	0.84	0.67	0.43	0.82	0.83	0.8	0.85	0.81	0.82	0.72	0.9	0.71	0.74	0.53	0.86	0.75	0.58	0.36	0.71	0.74	0.67	0.41	0.7	0.76	0.73	0.73	0.49	0.56
27434@uc003tjz.2@uc003tjw.1uc003tjx.1	ALE	0.0268187	0.58	0.62	0.55	0.87	0.74	0.84	0.65	0.42	0.79	0.84	0.81	0.84	0.79	0.82	0.68	0.91	0.72	0.72	0.52	0.87	0.72	0.56	0.37	0.62	0.72	0.66	0.49	0.68	0.74	0.75	0.76	0.44	0.54
27436@uc010faq.1@uc002rsj.1	AFE	0.00879109	0.1	0.15	0.07	0.17	0.17	0.02	0.09	0.53	0.19	0.04	0.06	0.11	0.12	0.05	0.32	0.05	0.07	0.35	0.11	0.17	0.16	0.1	0.24	0.35	0.11	0.19	0.44	0.19	0.47	0.13	0.26	0.35	0.18
2775@uc002eit.2@uc002eiu.2	ALE	0.00934552	NA	NA	0.65	0.55	0.57	0.49	0.61	0.79	0.79	0.79	0.71	0.67	0.76	0.79	0.34	0.48	0.84	0.76	NA	0.62	0.52	0.75	0.62	0.42	0.16	0.63	0.45	0.54	0.59	0.67	0.42	0.4	0.45
2778@uc002yad.1@uc002xzx.1uc002xzy.1	AFE	0.0211962	0.48	0.49	0.71	0.34	0.2	0.13	0.16	0.13	0.54	0.58	0.09	0.64	0.58	0.61	0.42	0.45	0.71	0.47	0.67	0.61	0.47	0.1	0.12	0.66	0.29	0.24	0.03	0.2	0.34	0.1	0.43	0.45	0.19
2801@uc004bul.1@uc004bug.1uc010mxw.1	ALE	0.00533024	0.66	0.53	0.35	0.47	0.49	0.49	0.49	0.47	0.57	0.54	0.51	0.58	0.64	0.46	0.58	0.56	0.6	0.5	0.59	0.59	0.33	0.48	0.49	0.58	0.42	0.4	0.39	0.36	0.47	0.43	0.37	0.67	0.46
2802@uc001ula.1@uc001ukz.1	ALE	0.0361533	0.88	0.8	0.93	0.93	0.95	0.88	0.96	0.9	0.87	0.94	0.94	0.96	0.9	0.87	0.89	0.93	0.85	0.83	0.89	0.92	0.93	0.96	0.88	0.92	0.92	0.93	0.93	0.91	0.94	0.95	0.96	0.96	0.94
283383@uc001uiv.1@uc001uit.2uc009zyo.1	ALE	0.00304664	NA	NA	0.51	0.52	0.51	0.47	0.51	0.42	NA	NA	0.5	0.57	NA	0.5	NA	0.55	0.42	NA	NA	0.49	0.42	0.44	0.46	0.43	NA	0.39	0.43	0.49	0.48	0.4	0.41	NA	0.46
284309@uc002qqa.1@uc002qpw.2uc002qpx.2	AFE	0.0110723	NA	NA	NA	0.31	0.17	0.23	0.45	NA	NA	0.25	0.33	NA	0.42	NA	NA	NA	NA	NA	NA	NA	NA	0.63	0.7	NA	NA	0.32	0.69	0.66	NA	0.62	NA	NA	0.35
284443@uc002npu.1@uc002npv.2	ALE	0.00345445	NA	0.31	NA	0.42	0.47	0.25	0.39	0.6	0.23	0.16	0.5	0.37	0.37	0.34	0.41	0.23	0.3	0.78	0.29	0.21	0.58	0.49	0.47	0.53	0.61	0.35	0.58	0.5	0.42	0.7	0.48	0.69	0.36
284443@uc002npv.2@uc002npw.1uc002npx.1uc002npy.1	ALE	0.040518	0.62	0.61	0.86	0.65	0.71	0.6	0.78	0.67	0.55	0.68	0.82	0.63	0.67	0.66	0.6	0.6	0.76	0.86	0.45	0.6	0.7	0.8	0.83	0.74	0.76	0.73	0.62	0.66	0.66	0.86	0.64	0.91	0.72
285527@uc003gyf.1@uc003gyl.1	AFE	0.0408409	NA	0.47	0.39	0.47	0.51	0.54	0.43	0.55	0.52	0.4	0.62	0.58	0.41	0.45	0.36	0.38	0.46	NA	0.43	0.51	0.6	0.42	0.52	0.4	0.56	0.61	0.44	0.51	0.61	0.57	0.57	0.51	0.58
285527@uc003gyg.1@uc003gyi.1	AFE	0.0164331	0.57	NA	0.55	0.44	0.52	0.49	0.61	0.55	0.53	0.47	0.46	0.48	0.4	0.39	NA	0.46	0.46	0.58	0.44	NA	NA	0.61	0.7	0.72	0.46	0.61	0.57	0.62	0.35	0.61	0.6	0.62	0.44
285989@uc003uqr.1@uc003uqp.1uc003uqq.1	AFE	0.00317034	0.48	NA	0.49	0.62	0.23	0.06	0.55	NA	0.6	NA	0.53	0.54	NA	0.55	0.5	0.51	NA	0.39	0.43	NA	NA	0.12	0.06	NA	NA	0.12	NA	0.32	NA	0.3	NA	0.14	0.23
287@uc003ibc.1@uc0033365.uc010ims.1	ALE	0.0459251	0.46	0.53	0.45	0.47	0.48	0.49	0.35	0.46	0.53	0.5	0.53	0.63	0.54	0.45	0.41	0.5	0.43	0.51	0.54	0.57	0.46	0.53	0.56	0.52	0.56	0.43	0.53	0.52	0.55	0.54	0.52	0.59	0.56
288@uc001jkv.1@uc001jkx.1	AFE	0.00418789	NA	0.56	NA	0.75	NA	0.5	0.55	NA	0.49	0.56	0.53	0.5	NA	0.56	NA	0.52	NA	0.59	NA	0.53	NA	0.5	0.4	NA	NA	0.42	NA	0.49	NA	0.45	NA	NA	NA
288@uc001jkv.1@uc001jlb.1	AFE	0.0324722	0.45	0.27	0.47	0.33	0.52	0.12	0.37	0.5	0.14	0.12	0.21	0.31	0.39	0.07	0.48	0.13	0.52	0.29	0.44	0.13	0.54	0.16	0.28	0.63	0.48	0.32	0.52	0.27	0.55	0.23	0.56	0.45	0.53
288@uc001jkw.1uc009xpa.1@uc001jkx.1	AFE	0.00575567	0.5	0.41	0.45	0.44	0.45	0.37	0.43	NA	0.51	0.42	0.55	0.4	0.48	0.45	0.55	0.51	0.49	0.57	0.49	0.38	0.46	0.47	0.59	0.51	0.53	0.59	0.57	0.58	0.58	0.61	NA	0.36	0.56
2896@uc002igr.1@uc002igp.1	AFE	0.0377437	NA	0.26	NA	0.05	0.04	0.02	0.03	0.2	0.09	0.02	0.04	0.3	0.19	0.03	0.17	0.1	0.02	NA	0.05	NA	0.25	0.12	0.02	NA	NA	0.16	0.08	0.05	0.56	0.22	0.31	0.23	0.61
28976@uc003elc.1@uc010hsw.1	AFE	0.0298783	NA	0.45	NA	0.47	0.51	0.52	0.57	NA	0.47	0.5	0.47	0.33	0.37	NA	0.51	0.42	0.55	NA	0.48	0.43	NA	0.59	0.53	NA	0.5	0.49	0.48	0.51	0.51	0.53	NA	0.5	0.6
29@uc002fsf.1@uc002fsd.1	AFE	0.0471104	NA	NA	0.53	0.58	0.42	0.42	0.35	0.48	0.55	0.47	0.44	NA	0.44	0.39	0.46	0.46	0.66	NA	0.47	0.64	0.5	0.52	0.61	NA	NA	0.59	0.52	0.61	0.46	0.55	NA	0.56	NA
29072@uc003cqr.1@uc003cqs.1	AFE	0.0047923	0.53	0.69	0.68	0.75	0.73	0.77	0.68	0.72	0.78	0.55	0.72	0.75	0.76	0.56	0.5	0.8	0.71	0.81	0.89	0.7	0.85	0.74	0.92	0.78	0.71	0.76	0.65	0.85	0.84	0.79	0.84	0.89	0.82
29072@uc003cqr.1@uc003cqu.1	AFE	0.00599874	0.55	0.69	0.7	0.75	0.7	0.76	0.65	0.69	0.78	0.51	0.71	0.74	0.75	0.54	0.47	0.77	0.7	0.73	0.87	0.67	0.87	0.73	0.92	0.77	0.67	0.74	0.6	0.82	0.82	0.76	0.86	0.88	0.84
29091@uc001wpt.1@uc001wpw.1	AFE	0.0441242	NA	0.39	NA	0.55	0.3	0.26	0.37	0.64	0.4	0.23	0.13	0.3	NA	0.25	NA	0.25	0.34	NA	0.47	0.3	NA	0.42	0.55	NA	NA	0.36	NA	0.64	0.45	NA	NA	NA	NA
2934@uc004blg.1@uc003091.uc004blf.1	ALE	0.00785847	0.04	0.02	0.02	0.01	0.01	0.01	0.01	0.03	0.01	0.01	0	0.01	0	0.01	0.02	0.01	0.03	0.05	0.01	0.01	0	0	0.01	0.01	0.01	0	0.01	0	0.01	0	0.01	0.01	0.01
2934@uc004blg.1@uc010mvq.1	AFE	0.00666762	NA	0.58	NA	0.55	0.61	0.69	0.62	0.46	0.66	NA	0.6	0.53	0.6	0.56	NA	0.72	0.64	NA	0.58	NA	0.54	0.38	0.62	NA	0.42	0.61	0.51	0.51	0.5	NA	0.54	0.52	0.49
2934@uc010mvu.1@uc004blf.1	AFE	0.0408205	0.51	NA	0.54	0.44	0.56	0.59	0.59	0.47	0.51	0.62	0.68	0.53	0.42	0.6	0.48	0.55	0.54	NA	0.47	0.52	0.62	0.5	0.54	0.57	0.48	0.6	0.6	0.66	0.61	0.52	0.66	0.59	0.67
2948@uc009wfi.1@uc001dyf.1uc001dyg.1uc009wfj.1	ALE	0.0122137	0.28	0.02	0.07	0.09	0.08	0.22	0.13	0.7	0.07	0.09	0.13	0.04	0.07	0.1	0.09	0.08	0.11	0.17	0.15	0.02	0.16	0.13	0.34	NA	0.16	NA	0.43	0.09	0.12	0.09	0.34	0.21	0.48
2972@uc001yqk.2@uc001yql.2	AFE	0.0277542	NA	0.53	0.56	0.53	0.56	0.5	0.56	0.35	0.39	0.83	0.46	0.56	0.36	0.76	0.49	0.38	0.63	0.52	0.38	0.53	0.38	0.51	0.38	0.47	NA	0.33	0.32	0.6	0.66	0.28	0.23	0.27	NA
2972@uc001yql.2@uc001yqp.2uc010axg.1uc001yqr.1	AFE	0.0157777	NA	0.57	0.8	0.69	0.35	0.31	0.25	0.13	0.68	0.86	0.21	0.78	0.51	0.84	0.28	0.69	0.85	0.58	0.78	0.62	0.48	0.26	0.09	0.53	0.33	0.23	0.14	0.42	0.6	0.46	NA	0.42	0.26
2972@uc010axi.1@uc001yql.2	AFE	0.018579	NA	0.3	0.36	0.3	0.25	0.38	0.28	0.31	0.47	0.59	0.18	0.38	0.11	0.64	0.44	0.16	0.51	0.32	0.28	0.47	0.21	0.24	0.23	0.4	NA	0.14	0.21	0.37	0.26	0.15	0.11	0.23	0.33
29775@uc003asu.1@uc003asy.1	AFE	0.0271651	0.34	NA	0.34	0.38	0.26	0.7	0.15	0.4	0.12	NA	0.08	0.22	0.25	0.04	NA	0.34	0.07	NA	NA	0.13	NA	0.66	0.53	0.51	0.6	0.29	0.53	0.6	0.11	NA	NA	0.27	NA
29775@uc003asv.1@uc003asy.1	AFE	0.0257092	0.62	0.56	0.39	0.33	0.63	0.37	0.71	0.74	0.76	0.73	0.7	0.73	0.55	0.74	0.64	0.39	0.72	0.64	0.61	0.54	NA	0.45	0.48	0.35	0.36	0.5	0.42	0.31	0.76	0.46	0.58	0.6	NA
2982@uc003iou.1@uc010iqc.1	ALE	0.0314408	0.48	0.6	0.76	0.91	0.88	0.81	0.96	0.56	0.78	0.55	0.9	0.7	0.81	0.68	0.76	0.97	0.85	0.68	NA	0.83	0.96	0.96	0.94	0.84	0.89	0.92	0.74	0.92	0.92	0.89	0.84	0.74	0.71
29960@uc003sll.1@uc003slm.1	AFE	0.0108748	0.49	0.59	0.62	0.66	0.56	0.57	0.53	0.36	0.53	0.47	0.52	0.53	0.49	0.41	0.48	0.59	0.46	0.44	0.57	0.52	0.44	0.46	0.52	0.47	0.57	0.45	0.39	0.38	0.56	0.41	0.45	0.39	0.43
3033@uc003hyr.1@uc003hyq.1uc010ilx.1	AFE	0.0230562	NA	NA	0.41	0.6	0.6	0.49	0.6	NA	NA	0.37	0.28	0.35	NA	0.53	NA	NA	0.45	NA	0.53	NA	NA	NA	0.37	NA	NA	0.34	0.41	0.29	0.33	0.33	NA	NA	NA
3105@uc010jrq.1uc00531.uc010koz.1	AFE	0.0388596	0.53	0.56	0.4	0.43	0.39	0.54	0.34	0.35	0.52	0.36	0.46	0.49	0.5	0.51	0.44	0.4	0.56	0.42	0.5	0.42	0.46	0.48	0.52	0.63	0.57	0.39	0.69	0.45	0.4	0.58	0.63	0.47	0.63
3107@uc003rfm.1uc003rfn.1uc003rfo.1uc010kmk.1@uc003nsx.1	AFE	0.0423128	0.59	0.51	0.56	0.43	0.44	0.47	0.52	0.47	0.54	0.49	0.46	0.36	0.64	0.59	0.43	0.53	0.44	0.48	NA	0.58	0.56	0.39	0.42	0.43	0.42	0.45	0.37	0.4	0.44	NA	0.55	0.4	0.61
3111@uc003roz.1@uc003sgk.1	ALE	0.0236811	0.06	0.05	0.04	0.03	0.02	0.01	0.01	0.05	0.02	0.02	0.01	0.06	0.01	0.02	0.05	0.02	0.06	0.22	0.12	0.07	0.13	0.03	0.06	0.12	0.09	0.03	0.05	0.01	0.09	0.07	0.06	0.08	0.08
3131@uc002iuh.1@uc002iug.1	AFE	0.0344389	NA	NA	NA	0.48	0.61	NA	0.54	NA	NA	NA	0.23	0.65	NA	0.31	NA	0.44	NA	NA	NA	NA	0.68	0.76	NA	NA	NA	NA	NA	0.68	0.57	NA	0.56	NA	NA
3155@uc001bib.1uc009vqr.1uc009vqs.1uc001bid.1@uc001bic.1	AFE	0.0386455	NA	NA	NA	0.37	0.48	0.51	0.5	NA	NA	0.46	0.46	NA	NA	NA	NA	0.65	0.59	NA	0.5	NA	NA	0.61	NA	NA	0.52	0.52	0.55	0.63	NA	NA	NA	NA	0.62
330@uc009yxb.1@uc001pgx.1	ALE	0.0156356	0.3	0.53	0.23	0.31	0.28	0.35	0.31	0.37	0.3	0.15	0.4	0.35	0.35	0.52	0.28	0.6	0.2	0.27	0.47	0.28	0.6	0.34	0.3	0.4	0.4	0.77	0.54	0.34	0.25	0.59	0.53	0.71	0.45
3303@uc003rju.1@uc003sbs.1	AFE	0.0408938	0.19	NA	NA	0.01	0	0	0	0.2	0	0	0	0.01	0.03	0	NA	0	0	NA	0.01	0	0.04	0	0.02	0.01	0.05	0.01	0.02	0	0.02	0.01	0.09	0.02	NA
3305@uc010kna.1@uc010jte.1	AFE	0.0233305	0.56	0.56	0.51	0.31	0.68	0.44	0.45	0.63	0.43	0.41	0.64	0.55	0.56	0.54	0.49	0.71	0.5	0.47	0.38	0.55	0.63	0.78	0.46	0.55	0.33	0.46	0.39	0.2	0.24	0.43	0.37	0.25	0.3
3305@uc010kqi.1@uc003rjt.1	AFE	0.0296531	0.36	0.41	0.67	0.43	0.13	0.09	0.32	0.7	0.07	0.54	0.53	0.53	0.14	0.34	0.43	0.36	0.32	0.65	0.22	0.5	0.84	0.23	0.46	0.24	0.48	0.62	0.91	0.68	0.47	0.35	0.78	0.8	0.54
3326@uc003oxc.1@uc003oxa.1	AFE	0.0278768	0.51	0.46	0.49	0.46	0.5	0.5	0.48	0.38	0.52	0.41	0.33	0.5	0.43	0.49	0.43	0.39	0.43	0.52	0.45	0.44	0.63	0.43	0.53	0.53	0.53	0.49	0.46	0.46	0.36	0.55	0.52	0.54	0.48
339883@uc003chb.1@uc003cha.2	ALE	0.00259223	NA	0.71	NA	0.65	0.64	0.59	0.55	NA	0.58	NA	0.62	NA	0.47	0.7	NA	0.41	NA	0.66	0.6	0.68	NA	0.39	0.43	NA	NA	0.51	NA	0.26	0.53	0.26	NA	NA	0.54
340267@uc003sre.1@uc003src.1	AFE	0.0476781	NA	0.52	NA	NA	NA	NA	0.6	NA	NA	NA	NA	NA	NA	NA	NA	0.52	0.51	NA	NA	NA	NA	0.5	NA	NA	NA	0.42	NA	NA	NA	NA	NA	0.42	NA
340385@uc003zed.1uc010mgd.1@uc003zef.1	ALE	0.0459089	NA	0.11	0.35	0.7	0.72	0.65	0.56	0.64	NA	0.61	0.88	0.62	0.46	0.34	0.77	0.81	0.77	0.42	0.61	NA	NA	0.76	0.76	0.62	NA	0.71	0.64	0.82	0.82	0.79	NA	NA	0.69
3423@uc004fcy.2@uc004fcx.2	ALE	0.0461856	0.49	NA	0.48	0.42	0.47	0.33	0.4	NA	0.53	NA	0.49	0.47	0.49	0.54	NA	0.49	0.47	NA	0.57	NA	0.44	0.51	0.59	NA	NA	0.57	0.5	0.55	0.57	0.44	NA	NA	0.56
3705@uc001ybf.1@uc001ybe.1uc001ybg.1	AFE	0.0282985	0.62	0.77	0.77	0.59	0.74	0.85	0.61	0.21	0.84	0.9	0.6	0.88	0.66	0.97	0.69	0.76	0.78	0.29	0.88	0.93	0.79	0.68	0.73	0.49	0.3	0.69	0.2	0.56	0.72	0.72	0.74	0.38	0.48
374977@uc001cxu.2@uc001cxo.1uc001cxp.1	AFE	0.0127565	0.43	0.37	0.54	0.62	0.55	0.49	0.43	0.46	0.52	0.48	0.5	0.54	0.5	0.46	0.56	0.42	0.4	0.36	0.55	0.41	0.53	0.58	0.6	0.5	0.52	0.62	0.6	0.53	0.62	0.58	0.61	0.47	0.37
375298@uc002unw.1@uc002uod.1	AFE	0.0100305	NA	0.5	0.56	NA	0.25	0.5	NA	NA	NA	NA	0.51	0.56	NA	0.51	NA	NA	NA	NA	NA	NA	NA	0.59	0.72	NA	NA	NA	NA	0.58	NA	0.59	NA	NA	NA
375449@uc003juu.1@uc003jur.2uc010iwz.1	AFE	0.014378	NA	NA	0.24	0.1	0.6	NA	0.29	0.61	NA	0.26	0.37	NA	NA	0.24	NA	0.36	NA	NA	NA	0.25	NA	0.71	0.29	NA	NA	0.71	NA	0.7	0.44	NA	NA	NA	0.61
375449@uc003juu.1@uc003jus.2uc003jut.1	AFE	0.0444444	NA	NA	0.44	0.51	NA	NA	0.36	NA	NA	0.32	0.61	NA	NA	0.46	NA	0.58	NA	NA	NA	0.48	NA	NA	0.64	NA	NA	NA	NA	NA	0.66	NA	NA	NA	NA
375449@uc003juu.1@uc003jut.1uc003juw.1	ALE	0.0210882	0.46	0.37	0.52	0.54	0.38	0.69	0.5	0.49	0.48	0.31	0.52	0.53	0.48	0.49	0.47	0.5	0.45	0.47	0.52	0.45	0.59	0.55	0.46	0.44	0.53	0.61	0.56	0.45	0.56	0.62	0.49	0.58	0.61
375449@uc003juw.1@uc003jur.2uc010iwz.1	AFE	0.042197	NA	NA	NA	NA	0.4	NA	0.47	0.5	NA	NA	0.43	NA	NA	NA	NA	NA	NA	NA	NA	NA	NA	0.49	0.62	NA	NA	0.6	NA	0.52	0.59	NA	NA	NA	0.49
376940@uc002thr.1@uc002thq.1	AFE	0.0241785	0.49	NA	0.44	0.53	0.49	0.44	0.39	NA	NA	NA	0.5	NA	0.4	NA	0.37	0.46	NA	NA	NA	NA	NA	0.53	0.57	0.62	0.66	0.5	0.4	0.56	0.4	NA	NA	0.66	NA
3778@uc001jxm.1uc001jxn.1@uc001jxk.1uc009xrt.1	ALE	0.0369753	0.43	0.58	0.58	0.73	0.82	0.67	0.84	0.58	0.73	0.61	0.84	0.63	0.67	0.7	0.64	0.93	0.39	0.43	0.63	0.63	0.9	0.85	0.74	0.7	0.73	0.6	0.64	0.81	0.74	0.72	0.81	0.73	0.65
3831@uc001ynm.1uc001ynn.1@uc001yno.1	ALE	0.02849	0.36	0.39	0.57	0.55	0.36	0.28	0.37	NA	0.66	0.45	0.25	0.28	0.64	0.44	0.55	0.28	0.55	0.7	0.41	0.54	0.27	0.21	0.29	0.58	0.4	0.28	0.31	0.34	0.34	0.43	0.16	0.44	0.35
3843@uc001vnf.1uc001vng.1@uc001vne.1	ALE	0.0243466	0.53	0.43	0.56	0.46	0.53	0.44	0.5	0.42	0.5	0.41	0.58	0.54	0.49	0.31	0.48	0.58	0.57	0.48	0.52	0.43	0.57	0.61	0.46	0.5	0.63	0.54	0.49	0.48	0.63	0.65	0.53	0.57	0.51
3895@uc010aor.1@uc001xcg.1	AFE	0.0314588	0.57	0.66	0.46	0.57	0.55	0.46	0.49	0.55	0.55	0.44	0.53	0.48	0.5	0.62	0.57	0.59	0.51	0.44	0.45	0.52	0.43	0.32	0.48	0.58	0.37	0.55	NA	0.49	0.35	0.39	0.5	NA	0.51
395@uc010neb.1uc004cur.1@uc004cum.1uc004cun.1uc004cup.1	ALE	0.0481204	NA	0.39	0.63	0.75	0.54	0.75	0.88	0.78	0.71	0.37	0.9	0.56	0.78	0.57	NA	0.83	NA	NA	0.82	0.68	0.87	0.82	0.9	0.77	0.65	0.77	0.8	0.85	0.82	0.8	0.79	0.74	0.78
3954@uc010icc.1uc003gdw.1@uc003gdv.1	ALE	0.0348589	0.17	0.1	0.13	0.14	0.08	0.07	0.07	0.08	0.07	0.03	0.03	0.08	0.09	0.1	0.09	0.12	0.11	0.31	0.06	0.1	0.04	0.06	0.07	0.11	0.08	0.07	0.06	0.08	0.25	0.04	0.04	0.05	0.05
3983@uc009xyh.1uc009xyn.1@uc009xyo.1	AFE	0.0063941	NA	0.47	0.55	0.51	0.51	0.54	0.44	0.54	0.5	0.4	0.48	0.37	0.47	0.43	0.44	0.4	0.57	NA	0.52	0.38	0.59	0.47	0.59	0.53	0.52	0.61	0.54	0.4	0.6	0.63	0.62	0.53	0.49
399665@uc004bsy.1@uc004bsw.1	AFE	0.0173029	0.73	0.77	0.87	0.63	0.88	0.81	0.69	0.72	0.94	0.87	0.87	0.92	0.63	0.81	0.83	0.86	0.87	0.4	0.83	0.88	0.71	0.82	0.78	0.63	0.54	0.89	0.71	0.68	0.58	0.79	0.59	0.6	0.78
4000@uc009wrp.1@uc001fnf.1	AFE	0.0056577	0.68	0.55	0.47	0.47	0.62	0.55	0.63	0.41	0.47	0.48	0.49	0.61	0.5	0.29	0.39	0.56	0.56	0.6	0.52	0.48	0.58	0.69	0.43	0.6	0.57	0.58	0.69	0.63	0.66	0.62	0.64	0.63	0.5
400931@uc003bgr.2@uc003bgu.2	ALE	0.0313784	NA	0.32	0.43	0.27	0.5	0.41	0.29	0.17	0.32	0.45	0.24	0.47	0.28	0.19	0.34	0.45	0.32	0.22	0.28	0.57	0.51	0.68	0.28	0.66	0.28	0.41	0.21	0.27	0.53	0.58	0.69	0.51	0.6
4012@uc003kmw.1@uc003kmv.1	AFE	0.0199757	0.77	0.78	0.82	0.88	0.9	0.87	0.86	0.73	0.89	0.94	0.86	0.96	0.92	0.93	0.67	0.9	0.92	0.8	0.93	0.9	0.88	0.9	0.72	0.72	0.86	0.79	0.48	0.77	0.86	0.68	0.89	0.89	0.62
4015@uc010jcq.1@uc003ksu.1	AFE	0.0426907	NA	NA	NA	0.33	0.37	0.51	0.68	0.52	0.23	0.17	0.33	0.23	0.42	0.16	NA	0.5	NA	NA	NA	NA	NA	0.45	0.69	NA	NA	0.43	0.58	0.62	0.61	0.73	0.36	NA	0.28
4046@uc001lul.1@uc001luj.1	AFE	0.0250599	NA	NA	NA	0.62	0.59	0.45	NA	NA	NA	NA	0.5	NA	0.64	NA	0.63	0.4	0.7	0.54	NA	NA	NA	0.68	NA	NA	NA	NA	NA	0.74	NA	0.67	NA	NA	0.67
4054@uc001oef.1@uc001oej.1	AFE	0.01481	0.55	0.65	0.73	0.74	0.73	0.56	0.87	0.34	0.61	0.68	0.86	0.7	0.56	0.65	0.62	0.66	0.74	0.52	0.58	0.52	0.74	0.77	0.79	0.68	0.68	0.81	0.77	0.66	0.83	0.73	0.71	0.68	0.66
4054@uc001oeg.1@uc001oej.1	AFE	0.0339516	0.59	0.72	0.65	0.75	0.84	0.64	0.88	0.48	0.5	0.73	0.89	0.71	0.57	0.76	0.62	0.71	0.76	0.57	0.65	0.62	0.7	0.8	0.83	0.69	0.63	0.85	0.8	0.76	0.81	0.71	0.78	0.74	0.77
410@uc010hbf.1@uc003bna.2	AFE	0.0319766	NA	NA	0.31	0.22	0.59	0.64	0.24	0.31	0.51	0.34	0.12	0.19	0.46	0.03	NA	0.27	0.14	NA	0.26	0.37	NA	0.52	0.52	NA	NA	0.36	0.57	0.59	0.68	NA	NA	0.58	0.13
4150@uc002dua.1@uc002dtv.1	ALE	0.0115259	0.52	0.67	0.13	0.42	0.44	0.6	0.78	0.24	0.52	0.71	0.6	0.51	0.66	0.68	0.72	0.75	0.63	0.32	0.63	0.56	0.33	0.51	0.49	0.46	0.49	0.6	0.15	0.52	0.45	0.38	0.56	0.23	0.31
4155@uc002lml.1uc002lmn.1uc002lmp.1@uc002lmr.1	AFE	0.0339815	0.3	0.53	0.6	0.53	0.41	0.35	0.22	0.07	0.89	0.92	0.27	0.93	0.4	0.9	0.5	0.4	0.92	0.66	0.75	0.92	0.47	0.26	0.4	0.54	0.38	0.23	0.12	0.37	0.36	0.46	0.28	0.38	0.59
4174@uc003anw.1@uc003anu.2uc003anv.2	AFE	0.0115984	0.33	0.27	NA	0.13	0.11	0.16	0.47	NA	0.17	NA	0.03	0.16	0.43	0.29	NA	0.13	0.38	NA	NA	0.42	NA	0.09	0.06	NA	NA	0.09	0.32	0.05	0.11	0.04	0.12	0.16	NA
4193@uc009zqy.1uc00888.uc009zqx.1	AFE	0.0154684	NA	NA	NA	0.6	0.6	0.52	0.52	0.61	0.47	0.62	0.59	0.51	0.4	0.54	NA	0.57	0.49	NA	0.59	0.54	0.47	0.43	0.45	0.52	NA	0.43	0.57	0.52	0.39	0.48	0.58	NA	0.47
4212@uc001zjm.1@uc001zjt.1	AFE	0.015873	NA	NA	NA	NA	0.6	NA	0.68	NA	NA	NA	0.78	NA	NA	NA	NA	0.62	NA	NA	NA	NA	NA	0.25	0.48	NA	NA	0.42	NA	0.27	NA	NA	0.49	NA	NA
4212@uc001zjn.1@uc001zjt.1	AFE	0.0275319	NA	NA	NA	NA	NA	NA	0.12	NA	NA	NA	0.16	NA	NA	NA	NA	0.1	NA	NA	NA	NA	0.38	0.31	0.38	NA	NA	0.5	NA	0.68	NA	NA	0.25	NA	NA
4281@uc004csz.2@uc004cth.2	AFE	0.0353043	0.4	0.41	0.43	0.6	0.48	0.62	0.53	0.61	0.48	0.41	0.38	0.47	0.68	0.5	0.49	0.63	0.55	0.58	0.46	0.44	0.44	0.42	0.35	0.48	0.34	0.58	0.4	0.48	0.4	0.49	0.44	0.44	0.45
4281@uc004csz.2@uc010ndv.1	AFE	0.00337212	NA	NA	NA	NA	0.45	0.43	0.55	NA	0.51	NA	0.52	0.51	0.59	0.51	0.46	0.57	0.53	NA	NA	NA	NA	0.49	0.5	0.42	NA	0.39	0.46	0.44	0.38	0.4	NA	0.44	NA
4281@uc004cub.1@uc00402.uc004ctj.2	ALE	0.00787931	0.47	0.53	0.35	0.49	0.49	0.47	0.41	0.49	0.54	0.55	0.41	0.52	0.46	0.73	0.56	0.53	0.43	0.42	0.45	0.48	0.52	0.57	0.52	0.46	0.64	0.6	0.59	0.58	0.5	0.5	0.55	0.49	0.68
4281@uc004cub.1@uc004ctl.1uc004ctm.1uc004ctn.1uc004cto.1	ALE	0.0162216	NA	0.42	0.45	0.56	0.58	0.57	0.46	NA	NA	NA	0.44	NA	0.57	0.44	0.5	0.43	0.52	0.4	0.36	NA	0.6	0.57	0.47	NA	0.59	0.57	NA	0.5	0.6	0.44	NA	0.59	NA
4292@uc010hgl.1@uc003cgl.1uc010hge.1	AFE	0.0251705	0.45	0.59	0.51	0.52	0.51	0.56	0.6	NA	0.39	0.52	0.5	0.59	0.51	NA	0.45	0.43	0.52	NA	0.64	0.5	0.36	0.43	0.47	NA	NA	0.53	NA	0.49	0.46	0.39	0.54	0.4	0.42
4296@uc001oev.1@uc001oex.1	AFE	0.0127714	0.47	0.56	0.44	0.48	0.47	0.61	0.51	0.73	0.42	0.35	0.62	0.5	0.74	0.51	0.39	0.75	0.19	0.61	0.36	0.31	0.42	0.6	0.68	0.57	0.61	0.58	0.82	0.64	0.58	0.72	0.61	0.74	0.66
4296@uc001oex.1@uc001oew.1	AFE	0.00423402	0.79	0.7	0.81	0.69	0.84	0.76	0.78	0.61	0.75	0.78	0.73	0.6	0.52	0.68	0.8	0.78	0.86	0.73	0.79	0.76	0.72	0.73	0.72	0.64	0.31	0.69	0.61	0.76	0.7	0.65	0.61	0.56	0.57
440081@uc001qvz.1uc009zgq.1@uc001qwa.1	AFE	0.0394427	0.59	NA	0.56	0.15	0.39	0.5	0.63	0.57	0.58	NA	0.63	0.12	0.71	0.53	0.56	0.66	0.49	0.44	NA	0.4	NA	0.46	0.43	0.2	0.54	0.58	NA	0.23	0.45	0.24	0.17	0.35	NA
440275@uc001zko.1@uc010bbj.1	AFE	0.0408714	NA	NA	NA	NA	0.45	0.52	0.49	NA	0.48	NA	0.54	0.66	0.56	NA	NA	0.53	0.46	NA	NA	0.61	0.41	0.5	NA	0.49	NA	0.5	NA	0.44	0.51	NA	0.42	0.46	0.48
440350@uc002dqw.1@uc010byk.1	ALE	0.0473431	NA	NA	NA	0.54	0.71	0.63	0.66	NA	0.55	0.69	0.59	0.53	0.6	0.43	NA	0.71	0.71	NA	0.82	0.57	NA	0.8	0.73	NA	0.63	0.79	NA	0.61	0.75	NA	NA	NA	NA
4430@uc002ust.1@uc002usq.1uc010fsg.1uc002usr.1uc002usu.1uc002usv.1	ALE	0.00476323	0.94	0.94	0.92	0.93	0.92	0.93	0.94	0.54	0.85	0.84	0.94	0.95	0.94	0.74	0.94	0.93	0.9	0.8	0.86	0.92	0.97	0.95	0.95	0.96	0.93	0.97	0.82	0.94	0.95	0.96	0.89	0.97	0.93
4439@uc003nww.1@uc003rjf.1uc003rjg.1uc003rjh.1uc003rjj.1	AFE	0.0139219	NA	NA	NA	NA	NA	0.47	0.55	NA	NA	0.56	NA	0.54	NA	NA	0.51	NA	NA	NA	NA	0.45	NA	0.61	NA	NA	NA	NA	NA	0.58	0.64	NA	NA	0.58	NA
444@uc003xup.1uc003xuq.1@uc003xul.1uc003xum.1uc003xun.1	ALE	0.0382638	0.95	0.92	0.96	0.91	0.96	0.96	0.96	0.77	0.9	0.94	0.98	0.97	0.95	0.85	0.93	0.94	0.91	0.62	0.96	0.98	0.98	0.99	0.95	0.96	0.81	0.96	0.94	0.96	0.94	0.99	0.98	0.96	0.98
4585@uc003fvm.1@uc010hzt.1uc003fvo.1uc003fvp.1	AFE	0.0228447	NA	NA	NA	0.84	0.87	0.62	0.73	0.61	0.71	0.91	0.75	0.66	0.9	0.74	NA	0.72	0.9	NA	0.88	0.56	NA	0.38	NA	0.7	0.68	0.67	0.71	0.64	NA	0.8	0.56	0.61	0.65
4629@uc002dea.1@uc002ddv.1uc002ddw.1uc010bvg.1	ALE	0.0313027	0.03	0.02	0.03	0.01	0.01	0	0	0.02	0.02	0.02	0.01	0.01	0.01	0.01	0.01	0	0.02	0.03	0.03	0.01	0	0.01	0.01	0.01	0	0.01	0.03	0	0	0.01	0	0.01	0.01
4629@uc002dea.1@uc002ddx.1uc002ddy.1	ALE	0.0186208	0.03	0.02	0.02	0	0.01	0.01	0	0.02	0.02	0.02	0.01	0.01	0.01	0.01	0.01	0	0.02	0.04	0.03	0.01	0	0.01	0.01	0.01	0	0.01	0.03	0	0	0	0	0.01	0.01
4629@uc010bvh.1@uc002ddv.1uc002ddw.1uc002ddx.1uc002ddy.1uc002deb.2	AFE	0.0294216	0.62	0.78	0.83	0.89	0.88	0.9	0.98	0.81	0.77	0.78	0.88	0.89	0.82	0.93	0.78	0.99	0.74	0.74	0.72	0.87	0.98	0.95	0.96	0.84	0.96	0.93	0.77	0.94	0.96	0.87	0.96	0.83	0.8
4629@uc010bvh.1@uc002ddv.1uc002ddw.1uc010bvg.1	ALE	0.00505255	0.02	0.02	0.01	0.02	0.01	0.01	0	0.02	0.06	0.02	0.01	0	0.04	0.01	0.01	0	0.01	0.03	0.04	0.01	0	0.01	0.01	0.01	0	0.01	0.01	0	0	0.01	0	0.01	0
4629@uc010bvh.1@uc002ddx.1uc002ddy.1	ALE	0.0196419	0.02	0.02	0.01	0.02	0.01	0.01	0	0.02	0.06	0.02	0.01	0	0.04	0.01	0.01	0	0.01	0.03	0.03	0	0	0.01	0.01	0.01	0	0.01	0.01	0	0	0.01	0	0.01	0.01
4629@uc010bvh.1@uc002dea.1	AFE	0.029957	0.47	0.54	0.52	0.6	0.43	0.54	0.76	0.48	0.57	0.41	0.33	0.59	0.51	0.69	0.6	0.83	0.16	0.57	NA	0.61	0.78	0.64	0.55	0.65	0.74	0.65	0.52	0.53	0.64	0.65	0.69	0.57	0.59
4629@uc010bvh.1@uc010bvg.1	AFE	0.0244183	0.62	0.78	0.75	0.88	0.88	0.89	0.98	0.78	0.74	0.73	0.87	0.87	0.85	0.93	0.65	0.99	0.72	0.76	0.78	0.89	0.98	0.94	0.9	0.86	0.96	0.92	0.7	0.95	0.95	0.89	0.95	0.82	0.82
4638@uc003egt.2@uc00484.uc003egs.1	ALE	0.0157251	0.93	0.97	0.99	0.98	0.98	0.99	1	0.96	0.98	0.98	0.99	0.99	0.99	0.97	0.98	1	0.99	0.97	0.95	1	1	1	0.99	0.99	1	0.99	0.9	1	1	1	1	0.98	0.99
4644@uc002aca.1uc002acb.1uc002acc.1@uc002aby.1uc002abx.2	AFE	0.0386527	NA	NA	NA	0.22	0.39	NA	0.28	0.37	NA	NA	0.52	NA	NA	NA	NA	NA	0.3	NA	NA	NA	NA	0.62	0.6	NA	0.32	0.59	0.61	NA	0.57	NA	0.55	NA	0.28
4645@uc002ldz.1@uc002leb.1	AFE	0.0270249	0.46	0.65	0.65	0.42	0.2	0.16	0.15	0.27	0.58	0.69	0.35	0.77	0.44	0.8	0.57	0.43	NA	0.64	0.68	0.71	0.45	0.39	0.3	0.24	NA	0.33	0.04	0.26	0.71	0.39	0.29	0.38	0.16
4645@uc002lea.1@uc002leb.1	AFE	0.0147749	0.49	0.21	0.25	0.45	0.76	0.72	0.69	0.44	0.15	0.06	0.5	0.14	0.38	0.11	0.47	0.57	0.14	0.31	0.28	0.21	NA	0.58	0.38	0.6	0.44	0.61	0.7	0.7	NA	0.38	0.71	0.54	0.52
4651@uc003jfv.2@uc010itx.1uc003jft.2	ALE	0.00421165	0.79	0.66	0.72	0.69	0.85	0.86	0.95	0.79	0.78	0.96	0.85	0.75	0.8	0.84	0.8	0.8	0.75	0.82	0.93	0.85	0.88	0.97	0.86	0.87	0.85	0.84	0.87	0.95	0.88	0.9	0.89	0.79	0.88
4671@uc003mpr.1@uc003kaq.2	AFE	0.0411255	NA	NA	NA	NA	0.84	0.81	NA	NA	NA	NA	0.8	NA	0.79	0.64	NA	0.71	NA	NA	NA	NA	NA	0.68	0.18	NA	NA	0.5	NA	0.62	0.76	0.72	NA	NA	NA
4678@uc001cok.1@uc001coh.1	AFE	0.0253535	0.26	0.26	0.49	0.01	0.01	0.02	0.09	0.34	0.35	0.19	0.01	0.5	0.02	0.45	0.04	0.03	0.47	0.68	0.39	0.54	0.02	0.01	0.15	0.03	0.44	0.16	0.15	0.02	0.03	0	0.25	0	0.01
4684@uc001pns.1@uc001pnp.1uc001pnq.1uc001pnr.1	AFE	0.0401492	NA	NA	NA	0.55	0.51	0.42	0.63	NA	NA	NA	0.53	NA	NA	NA	NA	0.6	0.57	NA	NA	0.48	NA	0.53	NA	NA	0.4	0.41	NA	0.47	NA	NA	NA	NA	0.44
472@uc001pkd.2@uc009yxt.1	ALE	0.00809834	NA	0.49	NA	0.55	0.37	0.37	NA	0.49	0.52	NA	0.39	NA	NA	NA	0.51	NA	NA	0.51	0.38	NA	NA	0.55	0.58	0.58	NA	0.58	NA	NA	0.54	NA	0.46	NA	0.62
473@uc001apd.1@uc001apf.1	AFE	0.0464007	0.25	0.15	0.43	0.66	0.31	0.4	0.22	0.16	0.3	0.25	0.23	0.25	0.5	0.11	0.29	0.4	0.26	0.51	0.19	0.19	0.68	0.68	0.14	0.4	0.69	0.16	0.65	0.53	0.92	0.3	0.26	0.35	0.28
4763@uc002hge.1@uc002hgi.1	ALE	0.00821118	NA	0.5	NA	0.57	0.25	0.45	0.17	NA	0.55	NA	0.45	0.57	0.58	0.15	0.66	0.68	0.53	0.6	0.54	0.59	0.15	0.27	0.3	0.5	0.26	0.32	NA	0.39	0.34	0.43	0.53	0.15	NA
4780@uc002ulf.2@uc002ulh.2	AFE	0.0383954	NA	0.64	0.3	0.03	0.07	0.08	0.1	0.52	0.04	0.02	0.07	0.02	0.33	0.05	0.1	0.06	0.09	NA	0.05	0.01	NA	0.05	0.29	0.58	NA	0.11	0.18	0.11	0.1	0.26	0.13	0.16	0.09
4780@uc002ulg.2uc010fra.1@uc002ulh.2	AFE	0.0280611	0.24	0.45	0.18	0.09	0.2	0.19	0.18	0.71	0.1	0.04	0.23	0.03	0.05	0.12	0.15	0.09	0.18	0.18	0.1	0.05	0.33	0.09	0.32	0.58	0.31	0.37	0.32	0.2	0.12	0.12	0.25	0.21	0.15
4782@uc002lxq.1@uc002lxo.1uc002lxp.1	ALE	0.0426932	0.46	0.62	0.36	0.4	0.47	0.52	0.48	0.42	0.46	0.48	0.65	0.53	0.42	0.39	0.44	0.35	0.54	0.42	0.51	0.66	0.47	0.58	0.62	0.55	NA	0.6	0.56	0.63	0.44	0.55	0.49	0.51	0.44
4784@uc002mwh.1@uc002mwe.1	AFE	0.0482228	NA	NA	0.56	0.6	0.52	0.47	0.51	0.51	0.48	0.39	0.6	0.53	0.48	0.53	0.42	0.42	0.53	NA	0.47	0.51	0.51	0.45	0.46	0.3	0.38	0.49	0.48	0.46	0.44	0.51	0.47	0.54	0.46
4799@uc003zso.1@uc003zsp.1uc010mjr.1	ALE	0.028432	0.44	0.53	0.31	0.44	0.49	0.43	0.53	0.41	0.49	0.55	0.47	0.43	0.49	0.51	0.5	0.43	0.53	0.42	0.48	0.48	0.49	0.55	0.42	0.55	0.49	0.52	NA	0.46	0.53	0.52	0.57	0.6	0.49
4836@uc010dad.1@uc002ihz.1	ALE	0.0293128	0.86	0.9	0.88	0.81	0.91	0.95	0.96	0.87	0.69	0.85	0.86	0.96	0.93	0.9	0.86	0.75	0.94	0.81	0.74	0.95	0.85	0.86	0.94	0.78	0.72	0.82	0.71	0.81	0.86	0.93	0.79	0.64	0.77
4850@uc003vsu.1uc003vsv.1@uc003vsr.1uc003vss.1uc003vst.1	ALE	0.0405516	0.66	0.51	0.53	0.61	0.46	0.63	0.58	0.59	0.51	0.49	0.65	0.66	0.54	0.51	0.57	0.46	0.38	0.57	0.57	0.6	0.71	0.46	0.62	0.54	0.52	0.63	0.75	0.52	0.61	0.59	0.76	0.67	0.71
4855@uc003oba.1uc003obb.1@uc003sfa.2	ALE	0.00794715	0.38	0.56	0.4	0.47	0.39	0.37	0.74	0.7	0.24	0.4	0.78	0.77	0.49	0.45	0.67	0.56	0.24	0.42	0.43	0.59	0.73	0.82	0.57	0.78	0.6	0.57	0.79	0.5	0.43	0.71	0.66	0.64	0.67
4869@uc003mbh.1@uc003mbi.1uc003mbj.1	ALE	0.0291499	0.91	0.87	0.93	0.95	0.9	0.87	0.92	0.78	0.88	0.8	0.89	0.76	0.91	0.84	0.9	0.88	0.84	0.9	0.89	0.84	0.96	0.92	0.87	0.92	0.9	0.88	0.73	0.88	0.95	0.93	0.93	0.95	0.97
4915@uc004aoc.1@uc002133.uc004aoa.1	AFE	0.0268789	NA	NA	NA	0.41	0.38	0.51	0.42	NA	0.48	NA	0.4	NA	0.44	NA	NA	0.49	0.48	NA	NA	NA	0.35	0.45	0.59	NA	NA	0.5	0.7	0.67	NA	0.57	NA	0.51	0.51
4926@uc001orj.2@uc001orl.1uc001orq.2	AFE	0.035212	0.41	0.49	0.36	0.63	0.55	0.59	0.55	0.48	0.5	0.55	0.63	0.59	0.56	0.5	0.44	0.4	0.56	0.41	0.46	0.54	0.56	0.57	0.57	0.69	0.5	0.54	0.52	0.59	0.5	0.64	0.63	0.57	0.52
4950@uc003kba.1@uc003jwu.1	AFE	0.00909097	NA	NA	NA	NA	0.42	0.46	0.49	NA	NA	NA	0.4	0.43	NA	0.48	0.53	0.5	0.43	NA	NA	NA	NA	NA	0.57	NA	NA	0.57	NA	0.5	NA	0.66	NA	NA	0.52
4950@uc003kba.1@uc003mpf.1uc003mpg.2	ALE	0.0429795	NA	0.45	NA	0.71	NA	NA	NA	NA	0.63	0.74	0.34	NA	0.64	0.64	0.66	NA	0.52	0.73	0.67	NA	NA	0.25	0.49	NA	NA	0.38	NA	0.61	0.65	0.6	0.43	0.54	NA
5046@uc002bxf.1@uc002bxa.1uc002bxb.1	ALE	0.0306205	NA	NA	NA	0.67	0.44	0.51	0.28	NA	0.42	NA	0.54	NA	0.61	NA	0.62	0.59	0.67	0.51	0.44	NA	0.57	NA	0.25	NA	NA	0.44	NA	0.34	NA	0.41	NA	NA	0.28
5066@uc003knz.1@uc003knx.1	AFE	0.0285484	0.41	0.57	0.38	0.51	0.39	0.5	0.61	0.6	0.47	0.53	0.56	0.59	0.52	0.46	NA	0.53	0.47	0.55	0.47	0.54	0.43	0.48	0.46	0.4	0.5	0.45	0.69	0.52	0.34	0.43	0.42	0.41	0.43
50717@uc001fvp.2uc001fvq.2@uc001fvn.1uc009wth.1uc001fvo.1	ALE	0.0294352	0.36	0.69	0.61	0.63	0.52	0.52	0.56	0.43	0.45	0.55	0.55	0.45	0.5	0.53	0.66	0.54	0.49	0.62	0.54	0.49	0.77	0.6	0.59	0.52	0.6	0.54	0.48	0.54	0.59	0.69	0.71	0.64	0.64
50804@uc001zwg.2@uc001zwh.2	AFE	0.036904	NA	NA	NA	0.55	NA	0.47	0.54	NA	0.58	NA	0.49	NA	NA	NA	NA	0.72	NA	NA	0.48	0.58	NA	0.61	NA	NA	0.36	0.49	NA	0.45	0.21	0.23	NA	NA	0.19
50804@uc001zwg.2@uc001zwl.2	AFE	0.0468545	0.4	0.39	0.67	0.44	0.12	0.45	0.14	0.51	0.64	NA	0.14	0.55	0.3	0.7	0.47	0.35	0.34	0.48	0.42	0.68	0.2	0.26	0.32	0.15	0.36	0.63	0.41	0.48	0.21	0.28	0.08	0.31	NA
50809@uc001beb.1@uc001bdx.1	AFE	0.0295986	0.41	0.78	0.46	0.84	0.53	0.61	0.75	0.53	0.76	0.78	0.45	0.43	0.77	0.81	0.7	0.5	0.38	0.8	0.7	0.76	0.67	0.26	0.49	0.49	0.52	0.39	0.4	0.56	0.7	0.41	0.69	0.51	0.65
5106@uc010ale.1uc001wlu.2@uc001wlr.1	AFE	0.00946081	0.59	0.43	0.56	0.42	0.55	0.69	0.66	0.56	0.49	0.53	0.65	0.6	0.42	0.49	0.49	0.53	0.55	0.51	0.42	0.46	NA	0.48	0.49	0.62	0.38	0.45	0.42	0.47	0.45	0.34	0.53	0.33	0.41
51088@uc003gtq.1@uc003gtr.1uc003gts.1uc003gtt.1	AFE	0.045976	NA	0.29	0.54	NA	0.59	NA	0.54	NA	0.54	NA	0.49	0.59	0.49	0.46	NA	0.38	0.55	0.44	0.47	0.62	NA	0.7	0.55	NA	0.7	0.63	NA	0.59	0.22	0.6	0.57	0.48	0.56
51105@uc003ytq.1@uc003yts.1	ALE	0.0408935	NA	NA	0.54	0.65	0.47	0.69	0.67	NA	0.62	0.4	0.68	0.62	0.38	0.61	0.19	0.6	NA	0.62	0.72	0.73	0.53	0.41	0.28	NA	0.54	0.67	0.33	0.35	0.45	0.61	0.29	0.57	0.64
51177@uc001etr.1@uc001ett.1	AFE	0.0407704	0.67	0.55	0.35	0.47	0.48	0.32	0.46	0.07	0.72	0.67	0.39	0.82	0.68	0.78	0.57	0.82	0.76	0.73	0.54	0.73	0.48	0.37	0.51	0.46	0.53	0.64	0.28	0.52	0.45	0.38	0.45	0.69	0.42
51177@uc001etu.1@uc001ett.1	AFE	0.0444842	0.6	0.72	0.25	0.38	0.26	0.19	0.23	0.02	0.64	0.69	0.15	0.67	0.43	0.63	0.52	0.63	0.57	0.58	0.52	0.75	0.39	0.15	0.26	0.5	0.43	0.5	0.18	0.29	0.3	0.15	0.27	0.56	0.34
51231@uc010ent.1uc002prl.2@uc002prg.2uc002prh.1uc002pri.1	ALE	0.0416511	0.08	0.15	0.13	0.15	0.04	0.06	0.04	0.32	0.08	0.03	0.03	0.02	0.04	0.04	0.15	0.11	0.09	0.44	0.04	0.02	0.15	0.06	0.13	0.3	0.34	0.05	0.14	0.07	0.15	0.04	0.17	0.17	0.14
51313@uc003ips.2@uc003ipp.2uc003ipq.2uc003ipr.2	ALE	0.0096794	0.16	0.19	0.16	0.09	0.12	0.16	0.15	0.7	0.2	0.29	0.17	0.2	0.12	0.27	0.09	0.17	0.35	0.09	0.14	0.21	0.1	0.09	0.15	0.1	0.11	0.12	0.34	0.17	0.07	0.07	0.11	0.09	0.13
51321@uc002jgx.1@uc0828.uc002jgy.1	ALE	0.0115537	0.48	0.52	0.51	0.59	0.57	0.44	0.58	0.63	0.47	0.46	0.51	0.55	0.73	0.36	0.55	0.39	0.67	0.65	0.72	0.5	0.5	0.68	0.79	0.48	0.75	0.73	0.7	0.58	0.74	0.74	0.69	0.34	0.79
51321@uc002jgy.1@uc002jgs.1	AFE	0.0381287	NA	0.52	0.53	0.51	0.54	0.48	0.47	NA	0.33	0.47	0.37	0.51	0.4	0.7	0.53	0.69	0.5	0.5	NA	0.49	0.44	0.66	0.46	0.43	NA	0.32	NA	0.45	0.44	0.44	0.43	0.45	0.51
5144@uc003jrs.2@uc003jrw.2	AFE	0.0223422	NA	NA	NA	0.54	0.4	0.41	0.52	NA	0.44	0.51	0.44	NA	0.35	NA	NA	0.32	NA	NA	0.69	NA	0.59	0.57	NA	0.54	NA	0.53	NA	0.53	0.59	NA	NA	NA	NA
5144@uc003jrs.2@uc003jsb.2uc010iwj.1	AFE	0.038741	NA	NA	NA	0.57	0.51	0.58	0.56	NA	0.54	0.58	0.55	NA	0.55	NA	NA	0.23	NA	NA	0.56	NA	0.59	0.57	NA	0.61	NA	0.53	NA	0.62	0.64	NA	NA	NA	NA
5144@uc003jru.2@uc003jrw.2	AFE	0.00216892	0.41	0.52	NA	0.47	0.46	0.55	0.55	0.46	0.51	NA	0.45	0.49	0.51	0.53	0.6	0.55	0.43	0.6	NA	0.62	0.35	0.47	0.39	0.42	NA	0.47	0.42	0.44	0.35	NA	NA	NA	NA
5144@uc003jsc.2@uc010iwi.1	ALE	0.0458662	NA	NA	NA	0.36	0.46	NA	0.5	NA	0.41	NA	0.44	NA	NA	NA	NA	NA	NA	NA	NA	NA	NA	0.55	0.49	NA	NA	0.46	NA	0.55	0.52	NA	NA	NA	NA
51447@uc003cus.1uc003cur.1@uc003cuq.1uc003cup.1	ALE	0.030782	0.53	0.64	0.6	0.65	0.61	0.57	0.64	0.38	0.68	0.49	0.57	0.62	0.53	0.51	0.59	0.59	0.53	0.77	0.58	0.59	0.76	0.49	0.54	0.51	0.67	0.49	0.36	0.62	0.51	0.51	0.46	0.4	0.44
51447@uc003cuv.1@uc003cuq.1uc003cup.1	ALE	0.00876846	0.46	0.54	0.49	0.52	0.48	0.39	0.48	0.35	0.61	0.46	0.4	0.43	0.36	0.37	0.47	0.45	0.46	0.69	0.52	0.42	0.58	0.34	0.34	0.39	0.53	0.32	0.33	0.49	0.42	0.34	0.34	0.33	0.33
51447@uc003cuw.1@uc003cuq.1uc003cup.1	ALE	0.0113944	0.37	0.46	0.44	0.46	0.46	0.33	0.42	0.34	0.58	0.46	0.35	0.37	0.33	0.34	0.4	0.4	0.46	0.65	0.5	0.35	0.5	0.28	0.27	0.38	0.5	0.26	0.32	0.45	0.36	0.3	0.26	0.31	0.3
51455@uc002tae.1@uc002tac.1uc002tad.1	ALE	0.015653	0.22	0.37	0.43	0.53	0.38	0.41	0.43	0.4	0.37	0.15	0.44	0.45	0.38	0.33	0.46	0.51	0.25	0.32	0.37	0.41	0.44	0.42	0.5	0.26	0.39	0.47	0.72	0.41	0.49	0.45	0.64	0.45	0.44
51474@uc001rwg.2@uc001rwj.2uc001rwk.2	AFE	0.00149592	0.58	0.51	0.5	0.6	0.37	0.49	0.41	0.55	0.49	0.47	0.16	0.59	0.3	0.49	0.57	0.46	0.48	0.6	0.48	0.48	0.48	0.5	0.6	0.6	0.59	0.62	0.74	0.72	0.68	0.63	0.2	0.66	0.64
5150@uc003xvr.1@uc003xvp.1uc003xvq.1	ALE	0.0436972	0.13	0.4	0.16	0.48	0.19	0.13	0.11	NA	0.42	0.35	0.11	0.44	0.37	0.81	0.46	0.18	0.28	0.5	0.12	0.49	0.07	0.07	0.07	0.12	0.2	0.12	0.24	0.11	0.26	0.33	0.59	0.16	0.21
51547@uc002kkc.1@uc002kcl.1	AFE	0.00347304	0.62	NA	0.6	0.54	0.44	0.55	0.54	0.68	NA	NA	0.54	NA	NA	NA	0.58	0.54	NA	NA	NA	NA	NA	0.52	0.37	NA	0.47	0.52	0.4	0.56	0.5	0.42	NA	0.35	0.53
5156@uc003hal.2@uc003hao.1	ALE	0.0188667	NA	NA	0.51	0.6	0.55	0.52	0.62	NA	0.72	0.59	0.59	0.78	0.64	0.58	0.54	0.77	0.49	0.62	NA	0.81	0.66	0.44	0.57	0.54	0.44	0.6	0.61	0.33	0.38	0.31	0.33	0.3	0.66
51604@uc002xom.1@uc0577.uc002xok.1	AFE	0.0371047	NA	0.37	0.67	0.53	0.18	0.72	0.68	0.53	0.62	0.63	0.64	0.66	0.53	0.64	0.57	0.4	0.74	0.52	NA	0.52	0.49	0.39	0.49	0.56	0.48	0.67	0.52	0.34	0.57	0.36	0.51	0.63	0.51
51657@uc003uef.1@uc003ueg.1	AFE	0.022609	NA	NA	NA	NA	0.42	0.44	0.44	0.42	0.47	0.4	0.61	0.5	0.63	0.54	NA	0.52	0.49	0.46	0.55	0.58	0.37	0.41	0.52	NA	0.35	0.41	0.5	0.35	NA	0.44	NA	0.42	0.49
51692@uc002qzp.1@uc010ewx.1uc002qzo.1	AFE	0.0124946	NA	NA	NA	NA	0.56	0.54	0.51	NA	0.64	NA	0.41	NA	0.54	0.49	NA	0.56	0.45	NA	0.66	0.5	NA	0.37	0.44	NA	NA	0.43	NA	0.48	0.44	NA	NA	NA	NA
51742@uc001hwp.1@uc001hwt.2	AFE	0.046419	0.49	0.27	0.37	0.27	0.41	0.51	0.4	0.33	0.46	0.3	0.44	0.51	0.39	0.48	0.41	0.48	0.4	0.55	0.53	0.32	0.24	0.46	0.44	0.3	0.31	0.54	0.32	0.52	0.26	0.32	0.19	0.17	0.29
51807@uc002znr.2@uc002znu.1uc002znv.1	AFE	0.0114359	0.59	0.59	0.53	0.43	0.49	0.55	0.62	0.52	0.72	0.58	0.56	0.5	0.58	0.47	0.55	0.48	0.44	0.5	0.52	0.54	0.51	0.52	0.43	0.35	0.49	0.47	0.45	0.41	0.47	0.55	0.54	0.52	0.48
51807@uc002znx.1@uc002znu.1uc002znv.1	AFE	0.0312427	NA	NA	NA	0.5	0.57	0.43	NA	NA	0.45	0.51	0.48	0.34	0.57	0.54	NA	0.38	0.46	NA	0.52	0.4	NA	0.56	NA	NA	NA	0.54	NA	0.72	0.55	NA	NA	NA	NA
5195@uc009vmu.1@uc001arn.1uc009vmv.1uc009vmw.1	ALE	0.0256298	0.71	0.9	0.81	0.93	0.86	0.77	0.96	0.73	0.91	0.95	0.98	0.96	0.91	0.95	0.9	0.91	0.86	NA	0.88	0.88	0.89	0.88	0.88	0.8	0.49	0.9	0.9	0.83	0.78	0.84	0.83	0.75	0.86
5216@uc002fzz.1@uc002gaa.1	AFE	0.0464976	0.03	0.09	0.07	0.06	0.01	0.01	0.01	0	0.72	0.37	0.01	0.43	0.01	0.66	0.02	0.01	0.1	0.4	0.28	0.2	0.05	0.01	0.01	0.01	0.02	0.01	0	0	0.07	0.01	0.04	0.08	0.03
5265@uc001yda.1@uc00808.uc001ydc.2	ALE	0.0281665	0.94	0.97	0.91	0.86	0.82	0.8	0.68	0.58	0.84	0.72	0.88	0.96	0.82	0.97	0.92	0.66	0.86	0.78	0.82	0.97	0.76	0.94	0.74	0.76	0.55	0.68	0.57	0.85	0.84	0.85	0.71	0.72	0.77
5269@uc003mui.1@uc003muk.1	AFE	0.0444486	0.59	0.49	0.6	0.89	0.56	0.7	0.74	0.59	0.68	0.68	0.71	0.78	0.73	0.76	0.73	0.58	0.84	0.63	0.8	0.72	0.52	0.51	0.58	0.6	0.63	0.79	0.43	0.53	0.63	0.74	0.57	0.71	0.67
5295@uc003jvd.1@uc003jvb.1	AFE	0.0293672	0.63	0.52	0.48	0.5	0.62	0.62	0.46	0.59	0.66	0.59	0.46	0.54	0.57	0.62	0.47	0.48	0.52	0.51	0.61	0.47	0.49	0.55	0.52	0.62	0.42	0.4	0.46	0.38	0.57	0.48	0.54	0.36	0.41
5315@uc002atu.1@uc010bit.1	AFE	0.0424457	0.46	0.48	0.44	0.57	0.56	0.44	0.46	0.42	0.48	0.4	0.46	0.39	0.43	0.35	0.35	0.58	0.6	0.56	0.43	0.57	0.52	0.45	0.55	0.45	0.52	0.62	0.63	0.47	0.58	0.57	0.41	0.5	0.64
5325@uc003qjv.1@uc003qkb.1	AFE	0.0402828	0.59	0.71	0.69	0.7	0.69	0.71	0.71	0.65	0.52	0.66	0.69	0.45	0.76	0.61	0.71	0.63	0.71	0.64	0.75	0.6	0.77	0.76	0.67	0.74	0.74	0.66	0.81	0.63	0.7	0.73	0.7	0.76	0.62
5325@uc003qjv.1@uc003qkg.1	AFE	0.0440215	0.59	0.76	0.73	0.7	0.7	0.71	0.71	0.62	0.52	0.66	0.69	0.46	0.76	0.61	0.73	0.61	0.71	0.58	0.75	0.62	0.81	0.76	0.67	0.75	0.75	0.66	0.76	0.64	0.7	0.72	0.71	0.77	0.62
5325@uc003qjv.1@uc003qkk.1	AFE	0.0419789	0.67	0.76	0.71	0.72	0.7	0.73	0.73	0.63	0.55	0.66	0.7	0.47	0.77	0.62	0.72	0.64	0.73	0.68	0.76	0.64	0.82	0.77	0.68	0.74	0.75	0.67	0.78	0.65	0.73	0.73	0.73	0.81	0.63
5325@uc003qjv.1@uc003qkl.1	AFE	0.0383699	0.65	0.73	0.7	0.71	0.7	0.73	0.71	0.69	0.55	0.66	0.7	0.47	0.77	0.63	0.72	0.63	0.71	0.61	0.77	0.61	0.82	0.77	0.68	0.75	0.77	0.67	0.77	0.64	0.71	0.72	0.72	0.79	0.63
5325@uc003qka.1@uc003qki.1	AFE	0.0106959	0.69	0.77	0.81	0.77	0.72	0.68	0.69	0.62	0.6	0.69	0.72	0.53	0.73	0.49	0.84	0.6	0.69	0.53	0.72	0.63	0.89	0.79	0.69	0.82	0.74	0.73	0.76	0.61	0.72	0.78	0.79	0.77	0.72
5325@uc003qka.1@uc003qkk.1	AFE	0.0074086	0.69	0.77	0.78	0.77	0.73	0.69	0.7	0.61	0.6	0.72	0.73	0.54	0.74	0.5	0.82	0.62	0.7	0.56	0.73	0.62	0.89	0.8	0.7	0.82	0.75	0.75	0.77	0.62	0.72	0.78	0.82	0.78	0.72
5325@uc003qka.1@uc003qkl.1	AFE	0.0108748	0.67	0.77	0.78	0.77	0.73	0.69	0.7	0.65	0.6	0.72	0.72	0.54	0.74	0.5	0.86	0.63	0.7	0.51	0.73	0.63	0.88	0.8	0.69	0.82	0.74	0.74	0.76	0.62	0.73	0.78	0.8	0.78	0.72
5325@uc003qka.1@uc003qkn.1	AFE	0.010815	0.7	0.77	0.81	0.76	0.73	0.68	0.7	0.61	0.6	0.72	0.72	0.53	0.74	0.51	0.83	0.63	0.7	0.52	0.72	0.61	0.89	0.8	0.69	0.83	0.75	0.74	0.77	0.62	0.72	0.78	0.8	0.78	0.72
5325@uc003qka.1@uc003qkp.1	AFE	0.0156269	0.64	0.77	0.81	0.76	0.72	0.68	0.7	0.62	0.59	0.71	0.72	0.53	0.75	0.5	0.83	0.61	0.7	0.53	0.73	0.62	0.86	0.79	0.69	0.81	0.73	0.74	0.76	0.61	0.73	0.77	0.81	0.76	0.72
5339@uc003zad.1@uc003zaf.1	AFE	0.0192679	NA	NA	NA	0.36	0.62	0.55	0.74	0.54	0.54	0.68	0.52	NA	0.4	NA	NA	0.48	0.51	NA	0.5	0.44	NA	0.46	0.43	NA	NA	0.37	0.42	0.46	NA	NA	0.4	0.45	NA
5364@uc003csy.1@uc003csw.1	AFE	0.0309506	0.66	0.44	0.49	0.39	0.56	0.54	0.48	0.51	0.2	0.45	0.51	0.47	0.43	0.44	0.25	0.52	0.28	0.47	0.4	0.42	0.7	0.49	0.48	0.61	0.48	0.41	0.62	0.52	0.27	0.7	0.63	0.47	0.65
5371@uc002aww.1@uc002awj.1	ALE	0.0324142	0.51	0.45	0.39	0.44	0.35	0.58	0.41	0.42	0.36	0.42	0.37	0.37	0.47	0.24	0.25	0.55	0.21	0.3	0.47	0.13	0.44	0.62	0.42	0.43	0.61	0.47	0.52	0.43	0.45	0.34	0.49	0.36	0.6
5371@uc002aww.1@uc002awk.1uc002awo.1	ALE	0.0201632	0.38	0.41	0.35	0.31	0.25	0.51	0.38	0.44	0.25	0.35	0.29	0.23	0.3	0.16	0.13	0.46	0.14	0.15	0.36	0.1	0.31	0.49	0.4	0.25	0.53	0.39	0.48	0.42	0.32	0.3	0.4	0.36	0.49
5371@uc002aww.1@uc002awl.1uc002awm.1uc002awy.1	ALE	0.0133874	0.48	0.4	0.37	0.35	0.27	0.51	0.38	0.4	0.27	0.37	0.35	0.29	0.36	0.17	0.17	0.48	0.15	0.24	0.4	0.09	0.47	0.51	0.38	0.33	0.56	0.4	0.47	0.44	0.33	0.33	0.44	0.42	0.53
5371@uc002aww.1@uc002awn.1uc002awx.1	ALE	0.0323997	0.38	0.37	0.36	0.31	0.25	0.5	0.41	0.44	0.25	0.3	0.3	0.23	0.32	0.18	0.12	0.46	0.14	0.22	0.42	0.09	0.32	0.52	0.4	0.23	0.53	0.4	0.48	0.41	0.36	0.27	0.4	0.32	0.52
5371@uc002aww.1@uc002awr.1uc002aws.1	ALE	0.0269592	0.35	0.56	0.34	0.78	0.6	0.61	0.21	0.53	0.22	0.57	0.19	0.49	0.42	0.14	0.19	0.47	0.32	0.44	0.69	0.25	0.56	0.46	0.44	0.64	0.59	0.76	0.58	0.59	0.3	0.52	0.56	0.66	0.64
53832@uc003qhi.1@uc003qhj.1	AFE	0.0446899	NA	NA	NA	0.3	0.43	0.29	0.23	NA	0.23	0.07	0.38	NA	0.66	NA	NA	0.48	0.17	NA	0.19	NA	NA	0.5	0.32	0.46	0.52	0.2	0.69	0.26	NA	0.44	NA	0.54	0.56
53841@uc001lqm.2@uc001lql.1	AFE	0.0273641	0.97	0.95	0.97	0.97	0.98	0.98	0.99	0.94	0.97	0.99	1	0.99	0.92	1	0.96	0.97	0.97	0.95	0.97	0.99	0.92	0.95	0.99	0.88	0.73	0.99	0.92	0.94	0.98	0.97	0.89	0.95	0.97
5395@uc010ktf.1@uc003spj.1uc003spk.1uc003spl.1uc010kte.1	ALE	0.0374606	NA	NA	NA	0.43	0.46	0.53	0.4	NA	0.58	NA	0.6	0.44	0.52	0.38	NA	0.47	0.56	NA	NA	NA	NA	0.55	0.65	0.5	NA	0.6	0.53	0.51	0.47	0.69	0.65	NA	0.56
5426@uc001ukr.1@uc001uks.1uc009zyu.1	AFE	0.00474614	0.56	0.45	0.38	0.43	0.36	0.5	0.35	NA	0.48	0.4	0.52	0.55	0.46	0.34	0.49	0.43	0.57	0.44	0.53	0.3	0.52	0.42	0.58	0.57	0.58	0.52	0.48	0.63	0.49	0.44	0.59	0.55	0.58
54453@uc010gcv.1@uc002wro.1uc010gcu.1	AFE	0.0304207	0.64	0.54	0.65	0.45	0.34	0.45	0.52	NA	0.61	0.45	0.62	0.59	0.49	0.65	0.51	0.61	0.39	NA	0.59	0.54	0.48	0.47	0.44	0.42	0.4	0.48	0.46	0.38	0.52	0.51	0.46	0.64	0.36
54468@uc010ktp.1@uc003srf.1uc003srg.1uc010ktq.1	ALE	0.0280347	0.55	0.36	0.52	0.67	0.54	0.56	0.52	0.23	0.59	0.71	0.53	0.64	0.55	0.52	0.53	0.43	0.87	0.34	0.49	0.53	0.5	0.54	0.71	0.61	0.54	0.52	0.72	0.59	0.59	0.57	0.68	0.76	0.76
54476@uc010kta.1@uc003sox.1uc003soy.1	AFE	0.0430684	0.52	0.31	NA	0.28	0.12	0.19	0.14	0.54	0.29	0.1	0.14	0.18	0.35	0.44	0.33	0.1	0.67	NA	0.42	0.08	0.62	0.2	0.47	0.58	0.42	0.27	0.57	0.13	0.28	0.44	0.58	0.33	0.6
54477@uc001rec.1@uc009zin.1	AFE	0.0147405	0.38	0.26	0.36	0.37	0.3	0.53	0.54	NA	0.34	0.63	0.45	0.41	0.54	0.49	0.53	0.32	0.41	0.56	0.43	0.56	0.2	0.4	0.41	0.19	0.16	0.42	0.45	0.43	0.28	0.24	0.51	0.31	0.26
54477@uc001red.1uc009zio.1@uc009zin.1	AFE	0.026609	0.6	0.52	0.5	0.53	0.42	0.49	0.64	NA	0.61	0.61	0.63	0.53	0.49	0.52	0.52	0.55	0.56	0.54	0.42	0.55	0.42	0.46	0.52	0.57	NA	0.41	0.48	0.47	0.5	0.52	0.47	0.56	0.51
54496@uc002evx.1@uc002evy.1uc002evz.1	ALE	0.036982	NA	NA	NA	0.44	0.59	NA	0.56	0.54	0.53	NA	0.52	NA	0.56	0.55	NA	NA	NA	NA	NA	0.4	NA	0.5	NA	NA	NA	NA	NA	0.51	0.39	NA	NA	NA	0.22
54521@uc010nqi.1@uc004eqn.1uc004eqo.1	AFE	0.0296395	0.45	0.85	0.67	0.58	0.55	0.56	0.42	0.43	0.64	0.62	0.52	0.54	0.65	0.35	0.54	0.5	0.35	0.66	0.61	0.45	0.84	0.61	0.41	0.8	0.81	0.53	0.55	0.43	0.7	0.76	0.75	0.79	0.68
54536@uc001kii.1@uc001kie.1	AFE	0.0190996	NA	NA	NA	0.51	NA	0.51	NA	0.53	NA	NA	0.39	NA	0.5	NA	NA	0.51	NA	NA	0.42	NA	NA	NA	0.58	NA	NA	0.53	NA	0.53	0.53	NA	NA	NA	NA
5460@uc003rxk.1@uc003rfj.1	AFE	0.0442809	NA	NA	NA	NA	0.53	0.53	NA	0.67	0.73	0.67	0.63	0.67	0.56	0.52	NA	0.59	NA	NA	0.69	0.59	NA	NA	0.71	NA	NA	0.73	0.75	0.78	0.55	NA	NA	NA	NA
54768@uc002ezx.1@uc002ezr.1	ALE	0.0488846	NA	NA	NA	NA	0.51	NA	0.6	NA	NA	NA	0.65	0.62	NA	NA	NA	0.65	NA	0.56	NA	NA	0.72	NA	NA	NA	NA	0.66	NA	NA	0.65	NA	NA	NA	NA
54796@uc003zmo.1uc003zmp.1uc003zmq.1uc003zmr.1uc010mij.1@uc003zmn.1	ALE	0.0015097	0.38	0.52	0.45	0.37	0.46	0.39	0.38	0.41	0.32	0.45	0.47	0.42	0.55	0.52	0.43	0.49	0.47	0.32	0.62	0.44	0.43	0.51	0.56	0.69	0.45	0.48	0.55	0.57	0.54	0.49	0.69	0.57	0.52
54822@uc001zyr.1@uc001zyt.2uc010bew.1	AFE	0.0331704	0.62	0.18	0.42	0.38	0.1	0.26	0.22	0.31	0.63	0.46	0.24	0.35	0.32	0.67	0.5	0.49	0.63	NA	0.48	0.21	NA	0.16	0.14	0.58	0.18	0.15	0.26	0.17	0.19	0.2	0.39	0.3	0.58
54832@uc002ahd.1@uc002ahb.1uc002ahc.1	ALE	0.0151635	NA	NA	0.51	0.36	0.4	0.45	0.34	NA	0.63	NA	0.54	0.44	0.52	0.42	0.54	0.46	NA	0.49	NA	0.45	0.67	0.49	0.61	0.46	NA	0.52	NA	0.7	0.65	0.52	NA	NA	NA
54840@uc003zrv.1uc010mjn.1@uc003zrz.1	AFE	0.00226603	NA	0.49	0.43	0.4	0.41	0.56	0.58	NA	0.43	NA	0.47	0.52	0.37	0.4	NA	0.44	0.45	NA	0.5	0.39	0.6	0.45	0.53	0.49	NA	0.59	0.48	0.59	0.5	0.54	0.67	0.51	0.58
54843@uc001pav.1@uc001pbe.1uc001pbf.2	AFE	0.0339366	0.66	0.86	0.77	0.8	0.56	0.77	0.86	0.67	0.81	0.85	0.86	0.65	0.83	0.79	0.52	0.73	0.62	0.4	0.68	0.67	0.87	0.83	0.76	0.9	0.47	0.76	0.92	0.85	0.69	0.93	0.84	0.85	0.8
54843@uc001paw.1@uc001pbe.1uc001pbf.2	AFE	0.00625718	0.13	0.15	0.09	0.06	0.05	0.16	0.11	0.25	0.13	0.23	0.06	0.23	0.09	0.19	0.57	0.11	0.2	0.2	0.15	0.07	0.06	0.04	0.1	0.05	0.21	0.05	0.05	0.07	0.09	0.03	0.09	0.07	0.17
54843@uc001pay.1@uc001pbd.1uc001pbb.1uc001pbc.1	AFE	0.0372609	0.64	0.7	0.71	0.82	0.93	0.73	0.84	0.63	0.79	0.72	0.86	0.78	0.91	0.68	0.66	0.79	0.65	0.69	0.59	0.84	0.87	0.88	0.86	0.81	0.73	0.89	0.74	0.89	0.75	0.9	0.82	0.8	0.66
54843@uc001pay.1@uc001pbe.1uc001pbf.2	AFE	0.00973447	0.23	0.29	0.15	0.11	0.11	0.26	0.16	0.24	0.21	0.35	0.12	0.36	0.1	0.31	0.54	0.2	0.3	0.32	0.27	0.11	0.09	0.08	0.16	0.1	0.36	0.09	0.11	0.12	0.17	0.05	0.11	0.12	0.28
54843@uc001paz.1@uc001pbe.1uc001pbf.2	AFE	0.0242392	0.13	0.24	0.21	0.1	0.22	0.22	0.19	0.23	0.21	0.39	0.15	0.42	0.18	0.27	0.58	0.23	0.22	0.21	0.18	0.18	0.18	0.17	0.21	0.08	0.37	0.14	0.11	0.2	0.23	0.12	0.15	0.12	0.2
54843@uc001pba.1@uc001pbe.1uc001pbf.2	AFE	0.012607	0.13	0.19	0.15	0.05	0.12	0.16	0.06	0.25	0.08	0.17	0.07	0.17	0.15	0.15	0.49	0.12	0.13	0.16	0.1	0.04	0.07	0.08	0.13	0.05	0.28	0.07	0.03	0.08	0.07	0.03	0.06	0.05	0.13
54856@uc001flx.1@uc001flz.2uc009wrh.1uc001fmd.2	AFE	0.0482558	0.55	0.5	0.58	0.69	0.51	0.4	0.55	0.54	0.45	0.42	0.5	0.61	0.6	0.49	0.65	0.6	0.58	0.5	0.54	0.54	0.39	0.43	0.47	0.51	0.36	0.56	0.47	0.56	0.45	0.55	0.52	0.38	0.55
54856@uc001flx.1@uc001fmb.2	AFE	0.0313879	NA	NA	0.36	0.53	0.51	NA	0.41	NA	0.31	0.48	0.48	0.3	NA	0.49	0.43	0.45	0.48	NA	NA	NA	0.6	0.46	NA	0.55	NA	0.53	NA	0.48	0.66	0.52	0.49	0.49	0.33
54862@uc010dzh.1@uc002mxn.1	AFE	0.0222522	0.26	0.6	0.65	0.34	0.42	0.27	0.3	0.2	0.76	0.86	0.33	0.79	0.44	0.84	0.37	0.36	0.72	0.54	0.52	0.83	0.45	0.24	0.24	0.42	0.42	0.31	0.27	0.28	0.43	0.22	0.26	0.31	0.65
54878@uc002apa.1@uc002aov.1	AFE	0.0435426	0.52	0.56	0.57	0.44	0.66	0.37	0.55	NA	0.59	0.44	0.53	0.45	0.54	0.5	0.47	0.52	0.57	0.61	0.49	0.5	0.6	0.38	0.53	0.41	0.46	0.45	0.44	0.53	0.48	0.52	0.48	0.44	0.35
54882@uc003lfq.1uc003lft.1uc003lfv.1@uc003lfr.1uc003lfw.1uc010jfl.1	ALE	0.0385905	0.47	0.49	0.51	0.62	0.54	0.56	0.57	0.55	0.44	0.4	0.42	0.51	0.51	0.54	0.5	0.5	0.54	0.51	0.56	0.55	0.56	0.42	0.49	0.52	0.49	0.46	NA	0.39	0.57	0.48	0.41	0.36	0.42
54882@uc010jfl.1@uc003lfv.1	AFE	0.026806	0.53	0.6	0.56	0.52	0.56	0.55	0.49	0.51	0.48	0.54	0.67	0.62	0.46	0.51	0.44	0.53	0.46	0.45	0.59	0.51	0.54	0.31	0.44	0.48	0.56	0.45	0.4	0.59	0.43	0.5	0.45	0.49	0.5
54899@uc003djx.1uc003djy.1@uc003dka.1	ALE	0.0371413	NA	0.43	0.35	0.72	0.55	0.63	0.34	0.57	0.69	NA	0.5	0.66	0.41	NA	0.63	0.57	NA	0.32	NA	0.54	0.79	0.78	0.63	0.32	0.7	0.76	0.67	0.6	0.55	0.63	0.63	NA	NA
54899@uc003djx.1uc03402.uc010hnk.1	ALE	0.0483564	NA	0.63	0.59	0.22	0.39	0.39	0.72	0.36	0.26	NA	0.44	0.28	0.52	NA	0.4	0.36	NA	0.59	NA	0.41	0.2	0.19	0.44	0.72	0.29	0.25	0.34	0.38	0.37	0.2	0.31	NA	NA
54934@uc001rrv.1@uc001rrw.2	AFE	0.0317622	NA	NA	NA	0.59	0.31	0.49	0.2	0.28	0.23	0.41	0.17	0.11	NA	0.17	NA	0.32	0.2	NA	0.36	NA	0.28	0.55	0.34	NA	0.59	0.14	0.33	0.45	0.51	0.59	NA	0.49	0.58
54946@uc010hsd.1@uc003eii.1uc003eil.1	ALE	0.0475988	NA	0.54	0.47	0.47	0.48	0.62	0.4	0.38	0.45	0.53	0.46	0.53	0.53	0.61	0.55	0.48	0.4	0.41	0.52	0.58	0.59	0.53	0.54	0.5	0.41	0.61	0.63	0.58	0.63	0.41	0.57	0.48	0.61
5498@uc001fyj.2uc001100.uc001fym.2@uc001fyi.2	ALE	0.0232812	0.37	NA	0.54	0.3	0.45	0.44	0.45	NA	0.43	0.43	0.44	0.47	0.43	0.4	0.49	NA	0.45	NA	NA	0.55	NA	0.52	NA	NA	0.56	0.55	NA	0.57	0.39	0.59	0.47	0.45	NA
55031@uc009ygi.1@uc001mjt.1	AFE	0.00497224	0.57	0.56	0.52	0.45	0.57	0.59	0.6	0.53	0.59	0.59	0.61	0.46	0.51	0.62	0.56	0.57	0.52	0.63	0.54	0.6	0.54	0.52	0.5	0.55	0.52	0.56	0.56	0.46	0.43	0.4	0.38	0.57	0.47
55074@uc003ymi.1@uc003ymg.1	AFE	0.0235605	NA	NA	NA	0.53	0.49	0.56	0.54	NA	NA	NA	0.55	NA	0.65	NA	NA	NA	NA	NA	NA	NA	NA	0.51	0.43	NA	NA	0.44	NA	0.53	NA	0.54	0.37	0.5	0.48
55074@uc003ymj.1uc010mch.1@uc003ymh.1	AFE	0.044502	0.84	0.85	0.79	0.72	0.56	0.55	0.51	0.19	0.9	0.93	0.57	0.88	0.52	0.87	0.35	0.67	0.73	0.57	0.87	0.87	0.65	0.52	0.43	0.58	0.64	0.45	0.26	0.53	0.6	0.72	0.74	0.61	0.45
55075@uc002asq.1uc010bin.1@uc002asr.1	AFE	0.0455323	NA	NA	0.5	0.41	0.43	0.52	0.57	NA	0.63	NA	0.5	NA	NA	0.42	NA	0.57	NA	NA	0.52	0.56	0.4	0.52	NA	NA	0.37	NA	NA	0.4	0.49	NA	0.54	NA	0.34
55088@uc009xyd.1@uc001lbd.2	AFE	0.0141596	0.69	0.46	0.51	0.65	0.54	0.65	0.41	0.47	0.55	0.6	0.54	0.57	0.59	0.51	0.47	0.52	0.45	0.55	0.56	0.42	0.58	0.68	0.45	0.49	0.38	0.38	0.44	0.45	0.41	0.4	0.41	0.35	0.58
5510@uc002war.1uc002was.1@uc002wat.1uc002wau.1uc002wav.1	ALE	0.00121439	0.52	0.44	0.44	0.38	0.54	0.58	0.5	0.45	0.56	0.46	0.55	0.47	0.44	0.5	0.44	0.51	0.42	0.48	0.42	0.47	0.58	0.6	0.5	0.58	0.5	0.57	0.55	0.56	0.51	0.56	0.44	0.64	0.6
55132@uc003igf.1@uc003ifw.1uc003ify.2uc003ifx.1uc003ifz.1uc003iga.1	AFE	0.0223064	NA	NA	0.37	0.53	0.49	0.5	0.59	NA	NA	0.51	0.53	0.44	0.54	0.6	0.52	0.44	0.44	NA	0.46	NA	NA	0.54	0.63	0.63	0.57	0.44	0.64	NA	NA	NA	NA	0.56	NA
55238@uc002eoe.1@uc002eoc.1uc002eod.1	ALE	0.0323444	NA	NA	0.75	0.75	0.62	0.86	0.87	NA	0.48	0.87	0.9	0.81	0.84	0.82	NA	0.82	0.86	NA	0.8	0.88	NA	0.92	0.65	0.64	NA	0.78	0.64	0.64	0.75	0.73	NA	0.67	0.72
55249@uc001flh.1uc009wqx.1@uc001flo.1	AFE	0.0256495	0.48	0.67	0.68	0.61	0.51	0.44	0.53	0.69	0.54	0.59	0.74	0.81	0.56	0.61	0.55	0.7	0.52	0.6	0.72	0.6	0.74	0.78	0.5	0.83	NA	0.51	0.64	0.7	0.85	0.75	NA	0.7	0.72
55249@uc001flk.1@uc001fln.1	AFE	0.0190936	0.52	0.45	0.49	0.6	0.58	0.35	0.47	0.59	0.49	0.39	0.54	0.35	0.34	0.63	0.51	0.43	0.5	0.55	0.47	0.45	0.58	0.53	0.6	0.53	0.51	0.57	0.6	0.51	0.74	0.53	0.35	0.55	0.67
55262@uc010lgp.1@uc003utr.1	AFE	0.0323565	NA	0.39	0.69	0.34	0.66	0.55	0.68	0.73	0.05	0.1	0.62	0.08	0.6	0.09	0.46	0.58	0.07	NA	0.18	0.16	0.68	0.69	0.62	0.61	NA	0.81	0.89	0.57	0.31	0.57	0.62	0.6	0.46
552900@uc010bzc.1@uc010byu.1	ALE	0.0191265	0.45	NA	0.82	0.67	0.56	0.58	0.79	NA	0.83	0.63	0.69	0.85	0.83	0.7	0.73	0.85	0.86	0.77	0.75	0.74	0.64	0.74	0.42	0.72	0.53	0.73	0.32	0.9	0.43	0.55	0.66	0.66	0.59
553115@uc001bte.1@uc001bth.1	AFE	0.0243466	0.48	0.54	0.41	0.57	0.43	0.45	0.6	0.36	0.54	0.45	0.43	0.46	0.49	0.44	0.49	0.55	0.52	0.54	0.35	0.51	0.53	0.57	0.51	0.65	0.54	0.45	0.5	0.56	0.57	0.63	0.42	0.59	0.52
55361@uc009xvw.1@uc001kog.1	AFE	0.0147679	0.6	0.36	0.3	0.18	0.48	0.52	0.42	0.92	0.11	0.32	0.51	0.24	0.19	0.09	0.41	0.35	0.32	NA	0.31	0.11	0.54	0.59	0.58	0.25	0.35	0.47	0.83	0.38	0.36	0.35	0.74	0.78	0.62
55466@uc002bdl.2@uc002bdi.1	AFE	0.0326497	NA	NA	0.23	0.19	0.23	0.07	0.09	0.24	NA	0.08	0.05	0.59	0.42	0.76	0.33	0.15	0.72	0.39	0.22	NA	0.11	0.04	0.11	NA	NA	0.03	0.07	0.1	0.37	0.04	NA	0.17	0.24
55521@uc003kqv.1@uc003kqs.1uc003kqt.1	ALE	0.019777	0.79	0.77	0.79	0.79	0.86	0.87	0.84	NA	0.79	0.73	0.93	0.79	0.86	0.85	0.73	0.76	0.72	0.71	0.83	0.87	0.66	0.89	0.62	0.75	0.58	0.69	0.67	0.86	0.79	0.83	0.64	0.65	0.77
55532@uc001hlv.1@uc001hlw.1	AFE	0.00784872	NA	0.68	0.53	0.42	0.54	0.87	0.8	0.69	0.17	0.17	0.59	0.16	NA	0.35	0.28	0.55	NA	0.31	0.25	0.06	0.44	0.68	0.38	0.65	NA	0.84	0.93	0.79	0.7	0.83	NA	0.63	0.73
55532@uc001hlv.1@uc001hlx.1	AFE	0.0151816	NA	0.68	0.41	0.43	0.52	0.87	0.69	0.69	0.14	0.19	0.6	0.15	NA	0.45	0.34	0.53	0.71	0.39	0.26	0.06	0.48	0.6	0.42	0.61	NA	0.83	0.91	0.78	0.64	0.83	NA	0.59	0.7
55553@uc001mmj.2@uc001mmi.2	ALE	0.0251799	0.41	0.3	0.47	0.49	0.43	0.6	0.33	0.22	0.5	NA	0.57	0.31	0.31	0.59	0.48	0.36	NA	0.29	NA	0.58	NA	0.44	0.5	NA	0.61	0.47	NA	0.48	0.55	0.63	NA	0.63	0.54
55556@uc010dkf.1@uc002kku.2uc002kkv.2uc002kkx.2	AFE	0.0183775	NA	0.47	0.42	0.54	0.5	0.54	0.47	0.52	0.39	0.56	0.58	0.51	0.58	0.54	0.51	0.57	0.53	0.48	0.52	0.49	0.45	0.47	0.39	0.49	NA	0.39	0.43	0.6	0.6	0.39	0.42	0.44	0.37
55578@uc001uwd.1@uc001uwg.1uc001uwj.1uc001uwk.1	AFE	0.00419774	0.51	0.55	0.53	0.45	0.39	0.6	0.59	NA	0.54	0.57	0.31	0.57	0.62	0.5	0.53	0.18	0.54	0.56	0.54	0.73	0.44	0.33	0.55	0.28	0.44	0.28	NA	0.4	0.52	0.23	0.5	0.44	0.49
55591@uc009ztc.1@uc009zsz.1uc001tdz.2	AFE	0.0384025	0.5	0.46	0.45	0.6	0.59	0.42	0.49	0.49	0.48	0.59	0.42	0.59	0.48	0.48	0.39	0.49	0.65	0.46	0.51	0.59	0.48	0.37	0.44	0.65	0.46	0.46	0.41	0.5	0.39	0.45	0.52	0.42	0.35
55612@uc002wmq.1@uc010gbt.1	AFE	0.0388105	0.52	0.71	0.48	0.68	0.64	0.75	0.66	0.67	0.83	0.89	0.64	0.58	0.64	0.27	0.49	0.72	0.63	0.6	0.64	0.75	0.44	0.89	0.66	0.38	0.46	0.62	0.73	0.63	0.57	0.57	0.44	0.41	0.41
55615@uc003bex.1@uc010gzu.1uc003bey.1	AFE	0.0205666	NA	NA	NA	0.62	0.53	0.65	NA	0.57	0.8	0.7	0.73	0.44	NA	0.64	NA	NA	0.5	NA	NA	0.53	NA	0.29	0.43	NA	NA	0.62	NA	0.43	0.54	0.42	NA	NA	NA
55615@uc003bez.1@uc003bfb.1uc003bfc.1uc003bfd.1	AFE	0.0234047	NA	0.31	0.26	0.5	0.23	0.47	0.05	0.12	0.49	NA	0.45	0.64	0.53	0.73	0.28	NA	0.72	NA	0.56	0.53	0.36	0.07	0.48	NA	0.26	0.08	0.14	0.2	0.24	NA	NA	NA	NA
55615@uc003bfh.1@uc003bew.1	AFE	0.0417526	NA	0.53	0.51	0.31	0.53	0.58	0.52	0.49	0.43	NA	0.69	0.57	0.42	0.48	0.51	0.5	0.68	NA	0.51	0.49	NA	0.5	0.48	0.35	NA	0.4	0.37	0.36	0.62	0.55	0.41	NA	0.38
55615@uc003bfh.1@uc003bez.1	AFE	0.00118081	NA	0.62	0.6	0.61	0.68	0.64	0.85	0.63	0.74	NA	0.48	0.39	0.6	0.56	0.71	0.86	0.69	NA	0.75	0.62	NA	0.85	0.77	0.78	NA	0.86	0.71	0.77	0.85	0.76	0.78	NA	0.84
55679@uc002tow.1@uc002toz.1	AFE	0.0357701	NA	NA	NA	NA	NA	NA	0.72	NA	NA	NA	0.62	NA	NA	NA	NA	0.72	NA	NA	NA	NA	NA	NA	0.6	NA	NA	NA	0.49	0.54	0.56	NA	NA	0.47	NA
55680@uc001joa.1@uc001joc.1uc001jod.1uc001joe.1	AFE	0.0420448	NA	NA	0.45	0.46	0.34	0.35	0.45	NA	0.48	0.53	0.45	NA	0.46	0.47	NA	0.52	0.41	0.58	0.53	0.49	0.38	0.57	0.56	NA	0.48	0.45	0.64	0.5	0.48	0.53	0.7	0.52	0.53
55683@uc002swh.2@uc002swk.2uc002swl.2	AFE	0.0371047	0.68	0.7	0.66	0.67	0.62	0.76	0.73	0.58	0.5	0.69	0.82	0.63	0.58	0.76	NA	0.74	0.71	NA	0.82	0.68	0.47	0.74	0.73	0.48	0.58	0.65	0.6	0.69	0.65	0.56	0.65	0.64	0.59
55684@uc004cjn.1@uc004cjh.1uc004cji.1uc010nbr.1uc004cjj.1	AFE	0.0200589	0.32	0.13	0.41	0.16	0.1	0.13	0.09	0.02	0.6	0.65	0.08	0.68	0.15	0.75	0.1	0.13	0.86	0.53	0.77	0.78	0.48	0.09	0.07	0.19	0.46	0.08	0.02	0.08	0.3	0.12	0.12	0.1	0.08
55689@uc003flz.2@uc003fly.1	AFE	0.0237436	NA	0.66	0.71	0.51	0.37	0.68	0.38	NA	0.69	0.66	0.33	0.78	0.51	0.77	0.53	0.49	0.74	NA	0.78	0.65	0.61	0.52	0.34	0.64	0.39	0.19	0.4	0.46	0.53	0.3	0.58	0.67	0.38
55761@uc001mxh.2uc001mxj.2@uc001mxi.1uc001mxk.1uc001mxl.1uc001mxm.1	ALE	0.0334122	0.58	0.56	NA	0.49	0.62	0.46	0.52	NA	0.58	NA	0.52	0.51	0.44	0.46	NA	0.58	0.48	0.65	0.58	0.53	NA	0.45	0.42	0.52	0.4	0.57	0.39	0.48	0.55	0.59	0.41	NA	0.36
55775@uc001xyd.1@uc001xxy.1uc010atn.1	AFE	0.0463641	0.48	0.47	0.6	0.38	0.58	0.73	0.78	0.64	0.58	0.03	0.74	0.66	0.6	0.53	0.52	0.46	0.68	0.27	0.58	0.59	0.46	0.45	0.66	0.58	0.63	0.57	0.47	0.52	0.36	0.3	0.19	0.41	0.4
55775@uc001xyd.1@uc001xya.1	AFE	0.0463824	0.54	0.48	0.6	0.36	0.49	0.71	0.77	0.69	0.66	0.09	0.76	0.58	0.59	0.63	0.55	0.4	0.7	0.12	0.7	0.59	0.48	0.43	0.62	0.54	0.63	0.57	0.58	0.43	0.4	0.26	0.23	0.4	0.48
55777@uc002twp.1@uc002two.1	AFE	0.041958	NA	NA	NA	0.64	0.35	NA	0.21	NA	0.4	0.24	0.22	0.2	NA	0.41	NA	0.23	NA	NA	NA	NA	NA	0.37	0.44	NA	NA	0.57	NA	0.55	0.42	NA	NA	NA	NA
55796@uc004ewt.1uc004ewx.1@uc004ewu.2uc004ewv.2	AFE	0.0297307	0.55	0.36	0.49	0.57	0.67	0.46	0.57	NA	0.43	0.61	0.44	0.6	0.41	0.6	0.39	0.45	0.55	0.51	0.55	0.69	0.5	0.49	0.41	0.47	0.44	0.5	0.36	0.44	0.47	0.42	0.48	NA	0.36
55832@uc001sto.2@uc001stn.2	AFE	0.0338452	0.64	0.53	0.53	0.59	0.51	0.54	0.47	0.63	NA	NA	0.67	NA	0.55	NA	0.61	0.57	0.42	0.37	0.5	NA	0.49	0.51	0.49	0.41	0.51	0.43	0.42	0.61	0.36	0.54	0.45	0.57	0.38
55839@uc002ffw.2@uc002ffx.2	ALE	0.0095135	0.46	0.51	0.53	0.47	0.48	0.53	0.55	0.48	0.68	0.4	0.55	0.57	0.61	0.52	0.56	0.51	0.45	0.48	0.55	0.62	0.4	0.49	0.37	0.52	NA	0.44	0.43	0.51	0.32	0.59	0.43	0.43	0.5
55890@uc002jks.1@uc002jkp.1uc002jkq.1	AFE	0.0106593	0.72	0.54	0.66	0.8	0.79	0.84	0.9	0.76	0.77	0.86	0.75	0.98	0.77	0.74	0.85	0.74	0.82	NA	0.78	0.87	0.68	0.62	0.58	0.81	0.57	0.71	0.78	0.72	0.78	0.73	0.46	0.57	0.81
55890@uc002jkt.2@uc002jkp.1uc002jkq.1	AFE	0.0016373	0.78	0.51	0.66	0.79	0.79	0.84	0.89	0.81	0.77	0.85	0.75	0.96	0.77	0.73	0.85	0.73	0.81	NA	0.76	0.86	0.66	0.62	0.58	0.8	0.48	0.71	0.8	0.72	0.75	0.72	0.48	0.56	0.74
5590@uc001ait.1@uc001air.1	AFE	0.0309225	NA	NA	NA	0.6	0.61	NA	0.47	0.5	0.72	0.49	0.75	0.43	NA	0.52	NA	0.59	0.44	NA	NA	NA	NA	0.75	NA	NA	NA	0.71	NA	0.77	0.61	NA	NA	NA	NA
5595@uc002dwr.1@uc002dws.1uc002dwt.1uc002dwv.2	AFE	0.00558223	0.61	NA	0.64	0.68	0.6	0.56	0.63	0.64	0.58	0.61	0.73	0.62	0.61	0.55	NA	0.65	0.64	0.61	0.64	0.68	NA	0.71	0.58	0.41	NA	0.55	0.6	0.26	0.58	0.61	0.45	0.45	NA
55973@uc003vei.1uc003vej.1@uc003vek.1uc003vem.1	ALE	0.0230764	0.7	0.86	0.9	0.83	0.93	0.88	0.92	0.71	0.9	0.8	0.91	0.85	0.95	0.83	0.9	0.92	0.82	0.86	0.78	0.85	0.93	0.95	0.95	0.9	0.89	0.83	0.82	0.86	0.94	0.95	0.96	0.94	0.87
55975@uc003svt.1@uc003svp.2uc003svr.2	AFE	0.0398268	NA	0.41	NA	0.5	0.42	0.57	0.45	0.42	0.44	0.54	0.47	NA	0.64	NA	0.47	0.41	0.46	NA	0.43	0.48	0.56	0.55	0.49	0.54	0.53	0.54	0.51	0.54	0.63	0.48	0.48	0.28	0.47
5598@uc002gvo.1@uc002gvq.1	AFE	0.0446329	NA	0.64	0.41	0.68	0.52	0.59	0.72	0.18	0.46	0.64	0.56	0.42	0.36	0.75	0.52	0.47	0.58	0.47	0.4	0.6	0.49	0.39	0.29	0.53	NA	0.32	0.21	0.25	0.48	0.66	0.62	0.35	0.26
56848@uc002pju.2@uc002pjr.1	AFE	0.0217292	NA	0.61	0.67	0.5	0.75	0.84	0.85	0.83	0.72	NA	0.92	0.6	0.74	0.39	NA	0.69	0.81	NA	0.49	0.68	NA	0.84	0.79	NA	NA	0.87	0.91	0.86	0.79	0.84	NA	0.7	0.78
56928@uc010dta.1@uc010dsy.1	AFE	0.0181098	NA	0.54	NA	0.4	0.44	0.54	0.44	0.56	0.46	0.53	0.44	0.5	NA	0.53	0.38	0.55	0.52	0.45	0.5	0.52	NA	0.68	0.57	0.55	NA	0.56	0.59	0.52	0.74	0.52	0.44	0.44	0.58
56965@uc002aua.1@uc002auc.1	AFE	0.0190781	0.5	0.57	0.65	0.39	0.42	0.28	0.54	0.68	0.53	0.83	0.44	0.36	0.49	0.24	NA	0.43	0.43	NA	0.14	0.19	0.65	0.44	0.64	0.7	0.54	0.53	0.78	0.49	0.58	0.44	0.61	0.46	0.66
5698@uc003rop.1@uc003och.1	ALE	0.0322093	0.17	0.36	0.32	0.16	0.15	0.23	0.11	NA	0.11	0.24	0.02	0.07	0.22	0.1	NA	NA	0.12	0.23	0.21	0.2	NA	0.15	0.09	0.43	0.25	0.21	0.39	0.24	0.19	NA	0.4	0.27	0.35
5698@uc003sga.1@uc003rop.1	ALE	0.0477913	0.19	0.31	0.38	0.12	0.08	0.15	0.15	NA	0.12	0.24	0.03	0.1	0.16	0.11	NA	NA	0.15	0.31	0.26	0.23	NA	0.13	0.1	0.37	0.3	0.22	0.26	0.25	0.25	NA	0.37	0.31	0.36
57120@uc003pxu.1uc003pxv.1@uc003pxq.1	ALE	0.0148268	0.47	0.54	0.55	0.64	0.53	0.5	0.55	0.44	0.43	0.44	0.52	0.51	0.58	0.6	0.56	0.53	0.64	0.56	0.41	0.5	0.37	0.48	0.42	0.58	0.4	0.52	0.44	0.5	0.48	0.42	0.5	0.54	0.4
57142@uc002ryc.1@uc002ryd.1	AFE	0.0101425	0.2	0.29	0.35	0.16	0.28	0.1	0.5	0.43	0.51	0.62	0.34	0.05	0.32	0.04	0.25	0.63	0.64	0.43	0.04	0.48	0.58	0.27	0.36	0.5	0.53	0.67	NA	0.55	0.5	0.44	0.72	0.48	0.58
57142@uc002ryc.1@uc002rye.1uc002ryf.1uc002ryg.1	AFE	0.0257363	0.46	0.51	0.44	0.4	0.68	0.53	0.74	0.8	0.63	0.76	0.85	0.14	0.62	0.08	0.55	0.84	0.77	0.69	0.1	0.65	0.75	0.74	0.66	0.71	0.57	0.89	0.84	0.79	0.74	0.85	0.61	0.73	0.7
57176@uc003req.1@uc010kpl.1	AFE	0.0254991	NA	NA	NA	0.58	0.42	0.47	0.49	0.53	0.5	NA	0.58	0.54	0.38	0.6	NA	0.48	0.49	0.58	NA	0.6	NA	0.52	NA	NA	NA	0.66	NA	0.58	NA	0.62	NA	NA	0.63
57176@uc010jsg.1@uc003rep.1	AFE	0.0210412	0.55	0.27	0.16	0.38	0.26	0.14	0.12	0.18	0.15	0.08	0.07	0.21	0.21	0.13	0.52	0.34	0.06	NA	0.19	0.21	0.41	0.19	0.21	0.35	0.39	0.34	0.38	0.21	0.3	0.16	0.68	0.28	0.22
57176@uc010jsh.1@uc003rep.1	AFE	0.0496148	0.41	0.37	0.41	0.26	0.25	0.54	0.49	0.7	0.6	0.25	0.36	0.51	0.55	0.61	0.4	0.19	0.71	0.74	0.21	0.71	0.37	0.59	0.21	0.36	0.38	0.23	NA	0.23	0.17	0.56	0.23	NA	0.4
57209@uc001izd.1@uc009xmc.1	ALE	0.0181789	0.87	0.92	0.87	0.87	0.86	0.84	0.81	0.64	0.9	0.68	0.86	0.78	0.79	0.94	0.72	0.91	0.81	0.79	0.77	0.88	0.76	0.82	0.8	0.63	0.76	0.65	0.68	0.86	0.74	0.77	0.72	0.85	0.86
57209@uc009xmc.1@uc001izc.2	ALE	0.0201215	0.2	0.11	0.15	0.14	0.15	0.18	0.21	0.34	0.15	0.37	0.17	0.23	0.22	0.12	0.26	0.1	0.21	0.19	0.2	0.13	0.44	0.17	0.22	0.48	0.27	0.33	0.24	0.16	0.23	0.22	0.27	0.16	0.19
57217@uc002rvr.1@uc010fbc.1	AFE	0.0141596	0.59	0.49	0.55	0.54	0.68	0.65	0.7	0.68	0.36	0.67	0.75	0.51	0.45	0.6	0.85	0.59	0.54	0.69	0.51	0.51	0.63	0.7	0.82	0.65	0.41	0.77	0.7	0.69	0.73	0.61	0.85	0.84	0.67
5727@uc010mrn.1@uc004avk.2	AFE	0.0305536	NA	0.56	NA	0.6	0.52	0.5	0.21	0.07	NA	NA	0.08	0.48	0.12	0.56	NA	0.57	0.54	NA	0.58	0.72	0.27	0.18	0.4	0.22	0.46	0.14	0.06	0.37	NA	0.35	NA	0.19	0.26
5727@uc010mro.1@uc004avk.2	AFE	0.0390036	0.65	0.61	0.65	0.69	0.56	0.57	0.36	0.12	0.83	0.84	0.54	0.81	0.41	0.78	NA	0.81	0.76	NA	0.67	0.65	0.45	0.67	0.69	0.5	0.63	0.34	0.18	0.64	0.63	0.47	0.63	0.17	0.5
5733@uc001dfq.1@uc001dfk.1uc001dfl.1	ALE	0.0397855	0.54	0.62	0.47	0.6	0.5	0.76	0.85	NA	0.58	0.55	0.84	0.64	0.42	0.61	0.67	0.91	0.64	0.48	0.47	0.55	0.66	0.84	0.66	0.61	0.71	0.69	0.62	0.71	0.73	0.66	0.68	0.61	0.62
57447@uc001vyt.1@uc001vzc.1	AFE	0.0110523	NA	NA	0.43	0.54	0.46	0.54	0.5	NA	0.52	NA	0.59	0.64	0.6	NA	0.43	0.49	0.5	NA	NA	NA	NA	0.53	0.59	NA	0.61	NA	NA	0.67	NA	0.69	0.56	NA	0.67
57449@uc001anj.1@uc001ann.1	AFE	0.0101008	NA	NA	NA	NA	0.53	0.61	0.45	0.51	NA	NA	0.57	0.63	NA	NA	NA	0.51	0.55	NA	NA	NA	NA	0.41	0.41	NA	0.49	NA	0.33	0.49	NA	NA	NA	NA	NA
57488@uc003woc.1@uc003wnz.1uc003woa.1uc003wob.1	ALE	0.0109015	0.55	0.44	0.51	0.56	0.37	0.42	0.45	0.5	0.35	0.38	0.44	0.27	0.5	0.27	0.45	0.43	0.21	0.34	0.43	0.43	0.66	0.46	0.47	0.59	0.42	0.41	0.41	0.44	0.6	0.67	0.5	0.65	0.59
5757@uc002vsd.2@uc002vsb.2uc002vsc.2	AFE	0.0246177	0.01	0	0	0	0	0	0	0.51	0.12	0.06	0	0.45	0	0.3	0	0	0.01	0.03	0.02	0.03	0	0	0	0	0	0	0.01	0	0	0	0.01	0	0
57575@uc003igz.1@uc003iha.1	ALE	0.0357143	NA	NA	NA	NA	NA	NA	0.62	NA	NA	NA	0.77	NA	NA	NA	NA	0.63	NA	NA	NA	NA	0.43	0.3	0.37	NA	NA	0.26	NA	0.51	NA	NA	NA	NA	NA
57579@uc003pfp.2@uc003pfl.2	AFE	0.02516	0.4	0.41	0.55	0.54	0.34	0.28	0.62	NA	0.54	NA	0.5	0.38	0.64	0.34	NA	0.43	0.37	0.46	0.48	0.51	0.59	0.54	0.5	0.65	NA	0.38	0.52	0.55	0.61	0.63	0.61	0.4	0.6
57579@uc010kan.1@uc003pfh.2	AFE	0.0458986	NA	0.55	0.57	0.57	0.54	0.52	0.61	0.45	0.55	NA	0.62	0.49	0.67	NA	0.5	0.51	0.6	0.52	0.54	0.59	0.59	0.56	0.48	0.46	NA	0.46	0.38	0.53	0.53	0.54	0.55	0.5	0.45
57602@uc002jwb.1@uc002jwc.1	AFE	0.019988	NA	NA	0.55	0.42	0.51	0.55	0.49	0.6	0.54	0.48	0.56	0.37	0.53	0.54	NA	0.46	0.58	NA	0.53	0.55	NA	0.53	0.53	NA	0.56	0.42	0.47	0.41	0.41	NA	0.36	0.4	0.37
57649@uc002hdk.1@uc002hdj.1	ALE	0.0490536	0.31	0.69	0.12	0.31	0.41	0.19	0.45	NA	0.25	0.08	0.2	0.15	0.24	0.3	0.43	0.26	0.18	0.55	0.58	0.15	0.39	0.21	0.56	0.37	0.62	0.41	NA	0.36	0.46	0.2	0.56	0.47	0.36
57701@uc001rvf.1@uc001rvb.2	ALE	0.00173086	0.62	NA	NA	0.71	0.67	0.5	0.58	0.63	0.52	0.75	0.83	0.66	0.7	0.65	0.59	0.78	0.66	0.63	NA	0.66	NA	0.49	0.38	0.55	0.5	0.52	0.67	0.63	0.56	0.57	0.48	NA	0.51
57701@uc001rvf.1@uc001rvc.2uc009zlk.1	ALE	0.0267292	0.62	NA	NA	0.77	0.72	0.56	0.61	0.49	0.68	0.78	0.9	0.7	0.74	0.68	0.6	0.77	0.7	0.55	NA	0.65	NA	0.57	0.55	0.56	0.56	0.5	0.55	0.72	0.67	0.72	0.51	NA	0.59
57704@uc003zxx.1@uc003zxy.1	AFE	0.0464739	0.77	0.58	0.58	0.47	0.53	0.48	0.41	0.24	0.6	0.57	0.48	0.62	0.54	0.66	0.64	0.57	0.73	0.36	0.55	0.56	0.62	0.51	0.45	0.5	0.25	0.46	0.44	0.45	0.44	0.63	0.47	0.5	0.53
57704@uc003zxy.1@uc003zxw.1	AFE	0.00397269	0.52	0.52	0.6	0.6	0.63	0.69	0.68	0.84	0.48	0.38	0.59	0.53	0.6	0.45	0.57	0.6	0.34	0.63	0.49	0.59	0.67	0.67	0.73	0.65	0.73	0.72	0.86	0.68	0.65	0.64	0.6	0.56	0.55
57714@uc002jyg.1@uc002jye.1uc002jyf.1	AFE	0.0389086	0.61	0.6	0.64	0.66	0.62	0.65	0.59	0.68	0.78	0.72	0.79	0.75	0.68	0.64	0.67	0.72	0.42	0.61	0.41	0.77	0.41	0.58	0.47	0.58	0.53	0.66	0.74	0.54	0.82	0.63	0.59	0.61	0.55
5791@uc001lkd.1@uc009yat.1	AFE	0.046719	NA	NA	NA	NA	0.48	0.4	0.37	NA	NA	NA	0.45	NA	NA	NA	NA	NA	NA	NA	NA	NA	NA	0.53	0.47	NA	0.57	0.59	0.42	0.66	NA	0.53	NA	NA	NA
58190@uc002vhz.1@uc002vhx.1uc002vhy.1	AFE	0.0381994	NA	0.3	0.72	0.26	0.31	0.67	0.37	0.25	0.08	0.04	0.23	0.05	0.66	0.07	0.61	0.55	0.33	0.52	0.05	0.54	0.47	0.46	0.16	0.57	0.66	0.35	0.41	0.5	0.78	0.78	0.64	0.6	0.54
5829@uc001txu.2@uc001txv.2	AFE	0.0292449	0.11	0.07	0.11	0.08	0.06	0.06	0.12	0.26	0.07	0.03	0.04	0.01	0.08	0.01	0.19	0.1	0.06	0.25	0.08	0.01	0.22	0.07	0.07	0.09	0.25	0.16	0.41	0.16	0.07	0.05	0.32	0.14	0.15
5829@uc001txu.2@uc001txx.2	AFE	0.0191138	0.15	0.1	0.19	0.13	0.11	0.13	0.21	0.45	0.12	0.05	0.08	0.02	0.11	0.02	0.25	0.2	0.1	0.44	0.16	0.03	0.3	0.13	0.14	0.11	0.3	0.29	0.55	0.28	0.12	0.11	0.45	0.23	0.24
58513@uc002neb.1uc002nec.1@uc002ndz.1uc002nea.1	ALE	0.00553597	0.57	NA	NA	0.33	0.38	0.65	0.54	0.53	0.61	0.42	0.5	0.1	0.53	0.61	0.58	0.71	0.76	0.55	0.36	0.29	0.62	0.67	0.73	0.64	NA	0.79	0.63	0.6	0.66	0.7	0.57	0.65	0.47
58533@uc001wse.1@uc001wsf.1	AFE	0.0353966	0.57	0.64	0.47	0.65	0.49	0.53	0.58	0.44	0.47	0.45	0.42	0.44	0.4	0.4	0.46	0.51	0.54	0.56	0.59	0.43	0.43	0.45	0.6	0.47	0.4	0.53	0.33	0.33	0.37	0.51	0.46	0.41	0.4
587@uc010emh.1uc0102959.uc002pkt.1	ALE	0.0120256	NA	NA	NA	0.05	0.02	0.02	0.04	NA	0.04	0.04	0.01	0.02	0.06	0.03	NA	0.04	0.07	NA	0.05	0.03	0.05	0.02	0.07	0.27	0.22	0.06	0.27	0.01	0.19	0.03	0.13	0.14	0.08
5890@uc010aqq.1@uc001xkg.1	ALE	0.017518	NA	NA	NA	0.3	0.25	NA	0.36	0.28	NA	NA	0.19	NA	0.57	NA	NA	0.49	NA	NA	NA	NA	NA	NA	0.15	NA	NA	0.19	NA	0.25	0.19	NA	NA	0.18	NA
5892@uc010ctj.1@uc002hit.1	AFE	0.0310201	NA	NA	NA	0.49	0.61	0.54	0.43	NA	0.46	0.58	0.61	0.58	0.59	0.59	NA	0.63	NA	NA	0.59	0.59	0.44	0.47	0.53	NA	NA	0.58	0.46	0.46	0.38	0.59	NA	NA	NA
5926@uc010apg.1@uc001xdo.1uc001xdp.1uc001xdq.1	ALE	0.00629216	0.36	0.42	0.36	0.41	0.32	0.5	0.39	0.4	0.39	0.27	0.4	0.38	0.43	0.4	0.42	0.37	0.44	0.56	0.51	0.6	0.34	0.48	0.29	0.33	0.37	0.36	0.21	0.4	0.38	0.38	0.37	0.33	0.24
59349@uc001gym.1@uc001gyo.1uc009xah.1	AFE	0.0394185	0.56	NA	0.6	0.66	0.38	0.56	0.45	NA	NA	NA	0.56	0.45	0.57	0.64	0.55	0.51	0.52	NA	0.54	0.54	0.49	0.61	0.44	0.45	NA	0.45	0.44	0.48	0.46	0.45	0.53	0.56	0.48
5954@uc001mtk.1@uc001mtj.1	AFE	0.0309927	0.2	0.09	0.08	0.28	0.09	0.14	0.12	0.01	0.76	0.71	0.1	0.79	0.16	0.73	0.19	0.11	0.86	0.36	0.69	0.85	0.13	0.11	0.07	0.14	0.71	0.05	0.03	0.1	0.08	0.18	0.55	0.05	0.1
5967@uc010ffx.1@uc002snz.1	ALE	0.0390332	0	0	0	0	0	0	0	0	0.01	0.22	0	0	0	0	0	NA	0	0.04	NA	0	NA	NA	0	0.09	0.12	NA	NA	0.06	0	NA	NA	0.06	0
5998@uc010mva.1@uc004bhu.1	AFE	0.0310995	0.33	0.56	0.36	0.61	0.51	0.45	0.36	0.47	0.61	0.51	0.34	0.44	0.53	0.42	0.6	0.44	0.51	NA	0.56	0.53	NA	0.62	0.6	NA	0.57	0.58	0.52	0.46	0.6	0.53	NA	NA	NA
60481@uc003pbu.1@uc003pbq.1uc003pbr.1uc003pbs.1	ALE	0.0108748	0.78	0.87	0.75	0.73	0.84	0.77	0.87	0.28	0.81	0.87	0.93	0.83	0.8	0.91	0.87	0.92	0.85	0.85	0.71	0.83	0.77	0.77	0.79	0.74	0.84	0.74	0.57	0.76	0.72	0.76	0.8	0.75	0.82
60528@uc002gnu.2@uc002gnw.2	AFE	0.0399153	0.51	NA	0.36	0.22	0.47	0.45	0.54	0.49	0.46	0.48	0.42	0.05	0.55	0.55	NA	0.52	0.48	NA	0.39	0.46	0.45	0.5	0.53	0.45	0.49	0.52	0.54	0.53	0.49	0.58	0.46	0.63	0.6
60528@uc002gnu.2@uc002gnx.2	AFE	0.0496974	0.53	NA	0.66	0.43	0.76	0.75	0.75	0.64	0.79	0.73	0.8	0.89	0.69	0.86	0.14	0.69	0.83	NA	0.7	0.85	0.5	0.72	0.6	0.62	0.59	0.65	0.47	0.76	0.68	0.71	0.6	0.77	0.59
60626@uc001loh.1@uc001lof.1uc001log.1	AFE	0.0407199	0.7	0.65	0.64	0.17	0.72	0.66	0.76	0.36	0.81	0.93	0.74	0.92	0.41	0.91	0.5	0.87	0.91	0.71	0.79	0.91	0.66	0.68	0.68	0.67	0.51	0.59	0.74	0.72	0.46	0.62	0.45	0.64	0.6
6188@uc001owg.2@uc001owk.1	ALE	0.0418061	0.45	0.7	0.54	0.57	0.27	0.18	0.34	NA	0.32	0.11	0.28	0.26	0.31	0.2	0.3	0.22	0.22	0.51	0.5	0.16	0.66	0.25	0.31	0.45	0.31	0.36	0.32	0.34	0.43	0.63	0.7	0.43	0.71
6196@uc010kkl.1@uc003qvb.1	AFE	0.0388282	0.51	0.39	0.68	0.64	0.55	0.73	0.71	0.9	NA	NA	0.85	NA	0.41	NA	0.58	0.68	NA	0.57	NA	NA	NA	0.89	0.76	NA	NA	0.77	0.81	0.81	0.74	0.65	NA	0.65	NA
6238@uc002wpt.1@uc010gcl.1	AFE	0.0311053	0.37	0.69	0.15	0.29	0.1	0.23	0.16	0.07	0.35	0.59	0.07	0.62	0.16	0.61	0.36	0.05	0.48	0.32	0.87	0.7	0.26	0.08	0.11	0.44	0.25	0.09	0.03	0.14	0.19	0.04	0.21	0.2	0.17
6238@uc002wpu.2@uc002wpw.1	AFE	0.0454324	0.58	0.55	0.5	0.48	0.48	0.42	0.49	0.75	0.42	0.57	0.49	0.44	0.48	0.42	0.5	0.5	0.5	0.48	0.46	0.42	0.51	0.53	0.56	0.56	0.42	0.56	0.79	0.45	0.56	0.51	0.48	0.51	0.57
6238@uc010gcm.1@uc002wpv.1	AFE	0.0119225	0.65	0.68	0.65	0.78	0.67	0.61	0.64	0.64	0.65	0.59	0.63	0.61	0.6	0.53	0.64	0.68	0.51	0.68	0.69	0.65	0.85	0.69	0.59	0.71	0.69	0.63	0.8	0.6	0.7	0.71	0.75	0.68	0.68
6238@uc010gcm.1@uc002wpw.1	AFE	0.0292992	0.68	0.73	0.69	0.79	0.69	0.63	0.65	0.63	0.66	0.58	0.65	0.61	0.66	0.53	0.64	0.71	0.52	0.69	0.68	0.65	0.86	0.71	0.59	0.74	0.66	0.65	0.77	0.63	0.72	0.75	0.77	0.68	0.71
6238@uc010gcm.1@uc002wpx.2	AFE	0.0134341	0.62	0.69	0.66	0.78	0.64	0.6	0.57	0.49	0.62	0.55	0.57	0.6	0.59	0.51	0.63	0.63	0.47	0.65	0.64	0.63	0.85	0.66	0.48	0.71	0.67	0.54	0.68	0.6	0.69	0.7	0.75	0.67	0.69
6238@uc010gcm.1@uc002wpy.2	AFE	0.026806	0.63	0.68	0.67	0.78	0.64	0.61	0.57	0.48	0.62	0.55	0.58	0.6	0.62	0.5	0.63	0.64	0.48	0.7	0.63	0.63	0.83	0.67	0.47	0.72	0.65	0.55	0.65	0.61	0.69	0.72	0.76	0.68	0.7
6242@uc010ffe.1@uc002slc.1uc002sld.1uc002sle.1	ALE	0.0191742	0.19	0.18	0.13	0.27	0.15	0.17	0.28	0.24	0.08	0.06	0.17	0.06	0.1	0.11	0.11	0.15	0.21	0.44	0.12	0.14	0.38	0.2	0.12	0.22	0.28	0.18	0.2	0.22	0.26	0.22	0.32	0.42	0.1
627@uc001mrs.1@uc009yjf.1	AFE	0.0252549	NA	0.42	0.47	0.54	0.42	0.44	0.45	NA	0.56	NA	0.3	0.32	0.46	0.49	0.44	0.51	0.32	0.44	0.48	0.3	NA	0.59	0.29	0.47	0.7	0.53	0.56	0.62	0.34	0.5	0.49	0.55	NA
627@uc001mrt.1@uc001mru.1	AFE	0.0404835	NA	0.53	0.47	0.66	0.59	0.52	0.48	NA	0.57	NA	0.58	0.53	0.52	0.44	0.51	0.56	0.62	0.61	0.45	0.53	NA	0.5	0.47	0.49	0.55	0.55	0.41	0.39	0.66	0.46	0.44	0.42	NA
629@uc003rku.2uc003rkv.2@uc003scr.2uc003scs.2	AFE	0.0274237	0.67	NA	0.64	0.8	0.54	0.59	0.85	NA	0.64	0.61	0.94	0.8	0.79	0.9	NA	NA	NA	NA	NA	0.54	0.62	0.78	0.65	NA	NA	0.51	0.36	0.63	0.62	0.62	NA	0.25	0.3
6303@uc010nfw.1@uc010nfv.1uc004dau.1	AFE	0.0417488	0.43	NA	0.72	0.37	0.49	0.5	0.53	0.44	0.52	0.58	0.62	0.5	0.58	0.57	0.6	0.56	0.53	NA	0.53	0.54	NA	0.32	0.42	0.45	NA	0.49	NA	0.41	0.5	0.54	0.47	0.58	NA
6337@uc001qnv.1@uc001qnw.1	AFE	0.00672254	0.34	0.34	0.4	0.32	0.29	0.39	0.33	0.45	0.23	0.15	0.38	0.2	0.37	0.13	0.38	0.25	0.21	0.54	0.26	0.23	0.47	0.37	0.42	0.34	0.51	0.43	0.49	0.35	0.4	0.33	0.3	0.39	0.48
6337@uc001qnv.1@uc001qnx.1	AFE	0.00925483	0.27	0.3	0.26	0.27	0.25	0.3	0.23	0.31	0.15	0.1	0.29	0.14	0.28	0.09	0.29	0.18	0.13	0.59	0.21	0.15	0.31	0.29	0.34	0.28	0.52	0.32	0.42	0.27	0.27	0.25	0.23	0.3	0.36
63892@uc002rtd.2@uc002rtb.1	ALE	0.0211611	NA	0.46	0.41	0.44	0.42	0.51	0.49	NA	0.46	0.48	0.54	0.63	0.66	0.43	0.42	0.43	0.55	0.4	0.49	0.45	0.42	0.5	0.55	0.56	0.67	0.5	0.49	0.53	0.53	0.47	0.54	0.7	0.52
63916@uc002xrv.1@uc002xrt.1	AFE	0.0268281	0.45	0.41	NA	NA	0.47	0.46	0.55	NA	0.53	NA	0.51	NA	0.59	NA	NA	0.38	0.48	0.43	NA	NA	NA	0.65	0.48	0.58	NA	0.55	NA	0.59	NA	NA	NA	NA	NA
63941@uc002wzl.1@uc002wzm.2uc002wzn.2uc002wzq.2uc010geo.1	AFE	0.00794244	NA	0.47	NA	NA	0.52	0.48	0.24	0.46	0.36	0.52	0.42	0.61	NA	NA	0.52	0.62	0.51	NA	0.53	0.5	0.43	0.11	0.15	NA	NA	0.46	0.24	0.44	NA	0.44	NA	NA	NA
6396@uc003bvl.1@uc003bvq.1	AFE	0.00837573	0.18	0.4	0.5	0.53	0.34	0.54	0.32	0.33	0.5	0.45	0.33	0.16	0.22	0.23	0.48	0.43	0.32	0.35	0.23	0.36	0.59	0.42	0.33	0.64	0.55	0.52	0.56	0.46	0.51	0.29	0.56	0.36	0.43
64005@uc003tmg.1@uc003tmi.1	AFE	0.0424317	NA	NA	NA	0.53	0.52	0.51	0.41	NA	0.51	NA	0.63	0.53	0.54	0.52	NA	NA	0.43	NA	NA	0.61	NA	0.5	0.4	NA	NA	0.64	0.38	0.45	0.43	NA	0.42	NA	0.43
64097@uc003kpv.1@uc003kpp.1	ALE	0.0372643	0.63	0.71	0.87	0.93	0.91	0.89	0.95	NA	0.9	0.87	0.87	0.92	0.8	0.89	0.75	0.95	0.79	0.8	0.91	0.84	0.87	0.97	0.97	0.91	0.79	0.97	0.82	0.95	0.95	0.95	0.86	0.91	0.91
641522@uc002ikk.2@uc002iki.2	ALE	0.0158374	0.48	NA	NA	0.46	0.45	0.52	0.51	0.55	0.51	0.57	0.49	0.52	0.48	0.44	0.39	0.45	0.54	NA	0.49	0.39	0.65	0.63	0.6	0.66	NA	0.43	0.53	0.34	0.55	0.58	0.59	NA	NA
64170@uc010nbj.1@uc004chg.2	ALE	0.0029526	NA	NA	NA	0.16	0.24	0.41	0.37	0.48	NA	NA	0.4	NA	0.22	NA	NA	0.21	NA	NA	NA	NA	NA	0.69	0.33	NA	NA	0.59	0.7	0.5	0.58	0.73	NA	0.45	NA
642846@uc001qvo.1@uc001qvn.2	AFE	0.0471672	0.6	NA	NA	0.08	0.35	0.42	0.65	0.54	0.55	0.34	0.64	0.11	0.68	0.55	NA	0.69	0.31	0.54	0.45	0.41	NA	0.36	0.25	0.26	0.45	0.62	NA	0.22	0.35	0.22	0.2	0.38	NA
642846@uc009zgn.1@uc001qvn.2	AFE	0.0322024	0.5	0.59	NA	0.74	0.45	0.45	0.41	0.44	0.45	0.59	0.57	0.61	0.34	0.64	NA	0.33	0.35	0.51	0.55	0.14	NA	0.48	0.35	0.59	0.36	0.53	0.64	0.81	0.62	0.81	0.65	0.75	0.59
64333@uc001snz.1@uc001soc.1	AFE	0.0185555	NA	NA	NA	0.46	0.7	0.19	0.33	0.58	0.47	NA	0.49	0.84	0.39	0.79	NA	NA	0.72	NA	NA	NA	NA	0.16	0.42	0.32	NA	0.28	0.63	0.32	0.26	0.27	NA	NA	NA
64333@uc001snz.1@uc001sod.1	AFE	0.0143216	0.56	NA	NA	0.41	0.52	0.54	0.47	0.54	0.52	NA	0.46	NA	0.43	NA	NA	0.47	0.4	NA	NA	NA	NA	0.68	0.63	0.55	NA	0.59	NA	0.66	0.5	0.51	NA	NA	NA
64333@uc001snz.1@uc001soe.1	AFE	0.0110523	0.58	NA	NA	0.63	0.56	0.79	0.61	0.65	0.56	NA	0.8	0.43	0.58	NA	NA	0.68	0.53	NA	NA	NA	NA	0.92	0.78	0.65	NA	0.79	NA	0.76	0.83	0.68	NA	NA	NA
64397@uc001zpv.1@uc001zpx.1uc001zpy.1	AFE	0.0190735	0.48	0.53	0.47	0.46	0.58	0.69	0.49	0.41	0.45	0.58	0.58	0.54	0.55	0.48	0.34	0.54	0.52	0.56	0.53	0.54	0.42	0.57	0.39	0.37	0.54	0.4	0.51	0.49	0.49	0.42	0.47	0.44	0.4
64428@uc010brc.1@uc002cjp.1uc002cjq.1uc002cjr.1uc002cjs.1	ALE	0.0342332	0.47	0.13	0.12	0.14	0.05	0.08	0.15	0.06	0.11	0.03	0.07	0.03	0.08	0.07	0.12	0.13	0.15	NA	0.05	0.07	0.27	0.05	0.11	0.24	0.14	0.12	0.05	0.13	0.41	0.17	0.16	0.15	0.13
64431@uc001thb.1uc001thc.1uc001thd.1uc001the.1uc001thf.1@uc009ztu.1	ALE	0.0106163	0.43	0.47	0.63	0.54	0.64	0.59	0.62	NA	0.47	0.46	0.55	0.53	0.61	0.55	0.43	0.52	0.57	0.51	0.39	0.55	0.33	0.35	0.53	0.45	0.59	0.45	0.4	0.39	0.42	0.56	0.46	0.51	0.43
64601@uc002whi.1@uc002whg.1	AFE	0.00613407	0.18	0.29	0.19	0.17	0.12	0.09	0.18	0.25	0.25	0.32	0.15	0.45	0.22	0.46	0.14	0.23	0.34	NA	0.49	0.2	0.21	0.09	0.09	0.06	NA	0.17	0.08	0.26	0.15	0.05	0.08	0.12	0.29
64761@uc003vvk.1@uc003vvl.1	AFE	0.036327	0.21	0.23	0.19	0.09	0.44	0.32	0.52	0.77	0.02	0.08	0.35	0.06	0.12	0.11	NA	0.32	0.07	0.53	0.1	0.04	0.55	0.32	0.32	0.29	0.39	0.32	0.81	0.37	0.13	0.19	NA	0.62	0.23
64787@uc001lqv.1@uc001lqt.1	AFE	0.00138409	NA	0.63	0.62	0.63	0.35	0.65	0.56	0.45	0.74	0.65	0.31	0.74	NA	0.81	0.64	0.59	0.57	0.69	0.8	0.82	NA	0.27	0.41	0.54	0.57	0.53	0.23	0.26	0.59	0.55	0.49	0.6	0.36
64787@uc001lqw.1@uc001lqt.1	AFE	0.0370228	0.62	0.81	0.77	0.85	0.77	0.83	0.77	0.54	0.82	0.73	0.75	0.84	0.78	0.86	0.68	0.77	0.64	0.65	0.79	0.75	0.7	0.64	0.74	0.74	0.73	0.76	0.52	0.49	0.82	0.82	0.62	0.71	0.64
64787@uc001lqw.1@uc001lqu.1	AFE	0.0321969	0.55	0.69	0.66	0.64	0.77	0.75	0.84	0.8	0.68	0.77	0.71	0.71	0.78	0.32	0.78	0.71	0.67	0.61	0.42	0.31	0.78	0.82	0.82	0.58	0.69	0.68	0.83	0.7	0.82	0.8	0.69	0.8	0.78
64787@uc001lqx.1@uc001lqt.1	AFE	0.0171719	0.53	0.61	0.64	0.75	0.51	0.64	0.53	0.53	0.74	0.64	0.38	0.64	0.66	0.75	0.63	0.69	0.72	0.64	0.73	0.82	0.62	0.39	0.37	0.71	0.53	0.52	0.4	0.31	0.66	0.54	0.56	0.71	0.48
6484@uc001qdz.1@uc001qdx.1	AFE	0.0204421	NA	NA	NA	NA	0.47	0.61	0.33	NA	0.47	NA	0.37	0.62	0.45	NA	NA	0.5	0.41	NA	0.46	0.47	NA	0.67	0.63	0.45	NA	0.68	0.53	0.55	NA	0.6	0.53	NA	NA
64926@uc002nbd.2@uc002nbe.2	AFE	0.00994781	NA	NA	0.57	0.43	0.5	0.56	0.59	0.51	0.45	0.39	0.57	0.54	0.57	0.5	NA	NA	0.46	NA	NA	NA	NA	0.44	0.3	NA	NA	0.42	0.43	0.45	0.48	0.47	0.42	NA	NA
65005@uc009wna.1@uc001eyv.1	ALE	0.0375283	0.05	0.13	0.14	0.13	0.03	0.05	0.06	NA	0.02	0.03	0.04	0.02	0.03	0.05	0.22	0.05	0.07	0.28	0.03	0.02	0.07	0.03	0.06	0.21	0.34	0.08	0.06	0.1	0.12	0.04	0.15	0.1	0.26
6503@uc010mdz.1@uc010mdy.1	ALE	0.0200616	NA	NA	NA	0.41	0.3	0.48	0.43	NA	NA	NA	0.32	0.22	0.49	0.74	0.46	0.45	0.78	0.47	NA	NA	NA	0.29	0.36	NA	NA	0.27	0.36	0.4	0.2	0.38	NA	NA	NA
6518@uc001app.2@uc001apo.1	ALE	0.010598	0.06	0.04	0.02	0.1	0.07	0.15	0.07	0.15	0.4	0.07	0.02	0.05	0.12	0.02	0.04	0.21	0.04	0.22	0.03	0.05	0.49	0.04	0.08	0.26	NA	0.15	0.27	0.16	0.12	0.09	0.22	0.19	0.1
6522@uc003wiu.2@uc003wit.2	AFE	0.0134972	NA	NA	NA	NA	0.05	0.07	0.08	0.07	NA	NA	0.03	NA	NA	NA	NA	0.1	NA	NA	NA	NA	NA	0.11	0.09	NA	NA	0.25	0.49	0.19	NA	NA	NA	NA	NA
65268@uc010mrd.1@uc004atk.2	ALE	0.0371815	0.38	0.29	0.71	0.72	0.26	0.47	0.44	0.6	0.72	0.72	0.2	0.67	0.7	0.76	0.64	0.24	0.46	0.6	0.76	0.65	0.43	0.58	0.12	0.57	0.55	0.2	0.06	0.26	0.46	0.41	0.69	0.46	0.61
6597@uc002mqh.2@uc002mqe.2	AFE	0.0331526	NA	0.65	0.48	0.55	0.44	0.37	0.48	0.25	0.88	0.87	0.53	0.78	0.4	0.8	0.54	0.33	0.9	0.52	0.53	0.75	0.73	0.58	0.43	0.36	NA	0.39	0.42	0.41	0.33	0.27	0.46	0.42	0.52
6597@uc002mqh.2@uc010dxo.1uc002mqf.2	AFE	0.0331349	NA	0.68	0.43	0.56	0.32	0.39	0.43	0.22	0.87	0.8	0.49	0.83	0.4	0.8	0.63	0.3	0.79	0.55	0.57	0.76	0.74	0.59	0.41	0.37	NA	0.37	0.27	0.35	0.32	0.29	0.48	0.35	0.55
6597@uc002mqh.2@uc010dxp.1	AFE	0.0269323	NA	0.64	0.53	0.61	0.45	0.38	0.57	0.28	0.86	0.81	0.59	0.8	0.58	0.82	0.67	0.43	0.75	0.31	0.56	0.8	0.57	0.59	0.38	0.25	NA	0.49	0.38	0.49	0.29	0.63	0.53	0.56	0.42
6597@uc010dxt.1@uc002mqg.1uc010dxq.1uc010dxr.1uc002mqj.2uc010dxs.1	AFE	0.0403754	0.37	NA	0.25	0.16	0.27	0.35	0.19	0.59	NA	NA	0.02	0.61	0.38	NA	NA	0.23	NA	0.61	0.4	0.35	NA	0.17	0.22	NA	NA	0.15	0.36	0.17	0.19	NA	NA	0.12	0.28
65975@uc001mgj.1@uc009yfp.1	AFE	0.00530528	NA	0.49	NA	0.53	0.4	NA	NA	NA	NA	NA	0.51	0.5	0.53	NA	0.5	0.45	NA	0.48	0.52	0.5	0.52	0.55	0.56	NA	NA	NA	NA	0.65	0.6	NA	NA	NA	NA
65981@uc001rjm.1uc001rjn.1@uc001rjh.1uc001rji.1uc001rjk.2uc001rjl.2	AFE	0.0438597	0.57	0.54	0.5	0.56	0.51	0.57	0.51	NA	0.51	0.51	0.38	0.4	0.53	0.52	0.53	0.5	0.53	0.48	0.49	0.54	0.53	0.58	0.54	0.65	0.56	0.55	0.58	0.57	0.41	0.54	0.52	0.4	NA
6603@uc010dea.1@uc010deb.1	AFE	0.0387338	0.56	0.58	0.54	0.62	0.73	0.76	0.69	0.73	0.48	0.63	0.84	0.63	0.65	0.63	0.51	0.73	0.69	0.58	0.55	0.48	0.68	0.92	0.75	NA	0.5	0.86	0.81	0.86	0.58	0.79	0.64	0.67	0.63
66035@uc002zyl.1@uc002zym.2uc002zyn.2uc002zyp.2	ALE	0.0227785	NA	NA	NA	0.31	0.13	0.12	0.17	0.29	0.29	NA	0.25	0.31	0.14	0.32	NA	0.11	NA	NA	NA	NA	NA	0.31	0.31	NA	NA	0.3	0.57	0.41	0.22	0.34	NA	NA	NA
6614@uc002wjb.1@uc002wjc.2	AFE	0.0107829	0.6	0.56	0.25	0.59	0.57	0.47	0.46	0.4	0.75	0.47	0.46	0.32	0.57	0.65	0.68	0.78	0.65	NA	0.3	0.43	0.58	0.59	0.43	NA	NA	0.26	0.24	0.18	0.42	0.32	0.32	0.22	NA
6660@uc001rfz.1@uc001rfv.1uc001rfw.1uc001rfx.1uc001rfy.1	ALE	0.045817	NA	NA	NA	0.4	0.37	0.43	0.49	NA	0.55	NA	0.55	0.49	0.43	0.42	NA	0.51	0.42	NA	NA	0.5	0.52	0.56	0.52	0.53	0.45	0.5	0.58	0.34	0.56	0.43	0.51	NA	0.58
6668@uc002imn.1@uc002iml.1	AFE	0.024741	NA	NA	NA	NA	0.58	0.47	0.55	NA	NA	NA	0.55	NA	0.63	NA	NA	0.54	NA	NA	NA	NA	NA	0.31	NA	NA	NA	0.46	NA	0.49	NA	NA	NA	NA	0.45
667@uc003pcx.2@uc003pcz.2	AFE	0.00353886	NA	NA	0.49	0.36	0.22	0.22	0.61	0.43	0.5	NA	0.09	0.35	0.37	0.45	NA	0.2	NA	NA	NA	NA	0.51	0.48	0.52	NA	NA	0.64	NA	0.6	0.52	0.56	0.47	NA	0.5
667@uc003pdb.2@uc003pcv.2uc003pcw.2uc003pcx.2uc003pcy.2uc003pcz.2	ALE	0.0336082	0.16	0.17	0.21	0.27	0.3	0.26	0.29	0.41	0.27	0.25	0.23	0.24	0.25	0.17	0.28	0.28	0.51	0.32	0.29	0.27	0.35	0.33	0.27	0.33	0.37	0.23	0.41	0.28	0.33	0.23	0.31	0.29	0.29
6672@uc002vqt.1@uc002vqu.1uc010fxp.1	ALE	0.0170414	0.72	0.66	0.75	0.68	0.64	0.57	0.67	0.47	0.57	0.4	0.58	0.64	0.71	0.64	0.69	0.66	0.57	0.65	0.78	0.45	0.6	0.62	0.57	0.59	0.44	0.54	0.48	0.57	0.64	0.61	0.62	0.41	0.57
6711@uc002rxx.1@uc002rxu.1	AFE	0.0109215	0.88	0.69	0.7	0.6	0.63	0.73	0.53	0.28	0.97	0.98	0.74	0.93	0.74	0.93	0.55	0.51	0.94	0.6	0.98	0.96	0.4	0.6	0.58	0.52	0.39	0.62	0.55	0.64	0.6	0.83	0.54	0.68	0.57
6711@uc002rxy.1@uc002rxu.1	AFE	0.00625282	0.65	0.32	0.27	0.08	0.1	0.12	0.1	0.2	0.79	0.88	0.15	0.46	0.13	0.61	0.12	0.09	0.77	0.22	0.89	0.74	0.03	0.08	0.12	0.13	0.16	0.12	0.15	0.11	0.07	0.16	0.1	0.12	0.1
6720@uc002grq.1@uc002grt.1uc002gru.1uc010cpq.1	AFE	0.044502	0.48	0.46	0.34	0.33	0.23	0.26	0.14	0.12	0.67	0.8	0.21	0.76	0.3	0.83	0.59	0.33	0.83	0.15	0.67	0.71	0.17	0.22	0.22	0.42	0.63	0.2	0.23	0.23	0.51	0.38	0.07	0.11	0.32
6720@uc002grq.1@uc010cpp.1	AFE	0.00140217	0.47	0.44	0.33	0.42	0.49	0.59	0.48	0.39	0.46	0.57	0.41	0.56	0.47	0.56	0.47	0.54	0.49	0.5	0.41	0.41	0.57	0.61	0.56	0.57	0.44	0.52	0.58	0.55	0.49	0.63	0.62	0.57	0.53
6720@uc002grr.1@uc010cpp.1	AFE	0.0377929	NA	0.63	0.46	0.49	0.58	0.35	0.47	0.39	0.49	0.46	0.61	0.59	0.6	0.52	0.57	0.53	0.47	0.62	0.61	0.63	0.39	0.46	0.32	0.46	0.49	0.45	0.53	0.55	0.53	0.55	0.48	0.48	0.39
6731@uc003hbw.1@uc003hbv.1uc010ihe.1	ALE	0.0006267	0.48	0.5	0.44	0.53	0.35	0.52	0.51	0.51	0.5	0.56	0.37	0.44	0.5	0.44	0.52	0.51	0.52	0.4	0.45	0.4	0.56	0.62	0.47	0.46	0.56	0.56	0.52	0.6	0.6	0.53	0.63	0.51	0.61
6813@uc002mhc.2@uc002mhb.2uc002mha.2	AFE	0.0148184	0.54	0.34	0.36	0.37	0.56	0.47	0.49	0.37	0.43	0.36	0.5	0.49	0.36	0.51	0.68	0.32	0.43	0.54	0.59	0.44	0.41	0.59	0.57	0.61	0.5	0.52	0.59	0.5	0.5	0.56	0.52	0.44	0.58
6840@uc009xlc.1@uc009xld.1	AFE	0.0154285	0.62	0.52	0.58	0.43	0.43	0.49	0.55	NA	0.53	0.61	0.57	0.44	0.41	0.55	0.39	0.57	0.34	0.5	0.53	0.58	0.48	0.5	0.52	0.5	0.39	0.36	0.39	0.43	0.42	0.44	0.47	0.44	0.41
6872@uc004dzt.2uc004dzu.2uc004dzv.2@uc010nle.1uc010nlf.1	ALE	0.0172467	0.44	0.36	0.53	0.41	0.57	0.62	0.42	0.42	0.44	0.41	0.53	0.36	0.38	0.41	0.56	0.5	0.45	0.42	0.58	0.42	0.43	0.58	0.69	0.54	0.49	0.6	0.5	0.53	0.62	0.52	0.38	0.52	0.68
6880@uc003jwa.1@uc003jwf.1	AFE	0.00160411	0.51	0.43	0.43	0.5	0.53	0.38	0.49	0.48	0.43	0.47	0.46	0.45	0.61	0.38	0.52	0.34	0.5	0.47	0.39	0.53	0.58	0.53	0.58	0.46	0.58	0.62	0.48	0.65	0.56	0.51	0.45	0.73	0.55
6880@uc003jwc.1uc003jwd.1uc003jwe.1uc003jwf.1@uc003jwa.1uc003jwb.1	ALE	0.00478878	0.59	0.62	0.64	0.44	0.58	0.59	0.65	0.46	0.5	0.67	0.57	0.74	0.41	0.71	0.62	0.56	0.55	0.32	0.64	0.61	0.3	0.53	0.47	0.46	0.5	0.61	0.45	0.54	0.46	0.49	0.37	0.49	0.48
6880@uc003mon.1@uc003mol.1	AFE	0.00378693	0.44	0.46	0.43	0.52	0.35	0.42	0.38	0.43	0.45	0.57	0.56	0.41	0.53	0.43	0.4	0.32	0.52	0.55	0.45	0.55	0.6	0.51	0.51	0.5	0.67	0.65	0.54	0.42	0.59	0.63	0.51	0.61	0.53
6880@uc003mon.1uc003moo.1uc003mop.1uc003moq.1@uc003mol.1uc003mom.1	ALE	0.00248645	0.6	0.62	0.63	0.44	0.58	0.59	0.64	0.5	0.5	0.68	0.57	0.74	0.41	0.71	0.64	0.56	0.54	0.3	0.63	0.62	0.3	0.52	0.46	0.47	0.49	0.6	0.5	0.54	0.47	0.49	0.36	0.49	0.48
6890@uc003ocg.1@uc003sfz.1	ALE	0.0425165	0.02	0.08	0.03	0.04	0.01	0.02	0.05	0.05	0.02	0.03	0.01	0.01	0.02	0.03	0.02	0.04	0	0.22	0.03	0.01	0.12	0.01	0.02	0.07	0.18	0.04	0.1	0.03	0.06	0.02	0.05	0.03	0.07
6925@uc002lgb.1@uc010dpi.1	AFE	0.00460566	NA	0.63	0.48	0.57	0.52	0.62	0.56	NA	NA	0.54	0.61	NA	0.48	0.36	0.55	0.6	0.54	0.53	NA	0.54	NA	0.44	0.45	0.47	0.48	0.46	0.51	0.5	0.51	0.57	0.37	0.4	NA
6925@uc002lgc.2@uc010dpi.1	ALE	0.0396398	NA	0.42	0.49	0.52	0.56	0.55	0.56	0.59	0.46	0.39	0.43	0.6	0.57	0.56	0.47	0.61	0.48	0.55	0.57	0.55	0.35	0.47	0.41	0.41	0.54	0.51	0.32	0.41	0.55	0.48	0.72	0.48	0.52
6927@uc001tzf.2@uc001tzg.1	ALE	0.0173713	0.89	0.86	0.83	0.9	0.84	0.9	0.94	0.92	0.88	0.94	0.98	0.96	0.86	0.92	0.87	0.91	0.79	0.63	0.9	0.96	0.72	0.92	0.92	0.7	NA	0.82	0.89	0.85	0.85	0.79	NA	0.73	0.75
6929@uc002ltn.1@uc002ltp.1uc002ltq.1uc002ltt.2	AFE	0.0358608	0.57	NA	0.55	0.44	0.51	0.43	0.45	NA	0.48	0.35	0.58	0.36	0.25	0.54	0.49	0.36	0.46	NA	NA	0.41	NA	0.63	0.52	0.53	0.56	0.39	NA	0.6	0.46	0.56	0.47	0.61	0.48
7052@uc002xhu.2@uc002xhs.1	ALE	0.0335034	0.34	NA	NA	0.5	0.5	NA	0.47	NA	0.33	NA	NA	0.48	NA	NA	0.39	0.61	NA	0.49	NA	0.51	NA	0.55	0.51	NA	NA	NA	0.54	0.57	NA	NA	NA	NA	NA
7105@uc010nna.1@uc004ega.1	AFE	0.0389641	0.56	NA	0.46	0.4	0.54	0.65	0.56	0.51	0.54	0.35	0.57	0.7	0.49	0.52	0.58	0.46	0.33	NA	0.57	0.53	0.49	0.5	0.53	0.48	0.45	0.43	0.43	0.29	0.49	0.25	0.57	0.33	0.55
7112@uc001tfh.1@uc001tfj.1uc001tfk.1	ALE	0.0154706	0.19	0.15	0.21	0.18	0.27	0.27	0.25	0.33	0.29	0.4	0.26	0.31	0.17	0.21	0.18	0.26	0.31	0.16	0.25	0.27	0.18	0.18	0.22	0.18	0.17	0.25	0.19	0.26	0.14	0.16	0.2	0.22	0.15
7148@uc003nzh.1@uc003nzl.2	AFE	0.0196749	NA	NA	0.65	0.75	0.62	0.64	0.73	0.54	0.64	0.79	0.75	0.7	0.78	0.86	0.62	0.67	0.86	0.65	0.63	0.9	0.56	0.61	0.5	0.53	0.75	0.65	0.7	0.6	0.88	0.62	0.61	0.55	NA
7148@uc003rlo.1@uc003rlp.1	AFE	0.0231105	NA	NA	0.57	0.79	0.5	NA	0.65	0.5	NA	0.76	0.55	NA	NA	0.78	NA	0.55	NA	NA	NA	0.61	0.34	0.5	0.37	NA	NA	0.43	0.67	0.42	0.64	NA	0.35	NA	NA
7148@uc003rlp.1@uc003rls.2	AFE	0.0209026	NA	NA	0.67	0.75	0.66	0.61	0.74	0.55	0.68	0.75	0.73	0.7	0.77	0.85	0.55	0.68	0.88	0.63	0.59	0.9	0.54	0.59	0.53	0.53	0.8	0.67	0.71	0.58	0.86	0.54	0.55	0.51	NA
7148@uc003sdl.1@uc003sdm.1	AFE	0.0401607	NA	NA	0.5	0.68	0.59	NA	0.64	0.5	NA	0.59	0.55	NA	NA	0.74	NA	0.55	NA	NA	NA	0.55	0.37	0.47	0.37	NA	NA	0.45	0.74	0.4	0.62	NA	0.41	NA	NA
7148@uc003sdm.1@uc003nzl.2	AFE	0.0259995	NA	NA	0.59	0.55	0.55	0.58	0.83	0.74	0.34	0.67	0.94	0.71	0.82	0.84	0.46	0.82	0.83	0.49	0.37	0.79	0.84	0.83	0.82	0.79	0.78	0.86	0.84	0.85	0.92	0.59	0.76	0.62	NA
7148@uc003sdo.2@uc003nzh.1	AFE	0.0212351	0.5	0.41	NA	0.1	0.26	0.31	0.72	0.65	0.25	0.24	0.52	0.28	NA	NA	NA	0.36	0.24	NA	0.38	0.26	0.69	0.38	0.6	0.73	0.35	0.61	0.51	0.31	NA	NA	0.66	0.43	NA
7148@uc003sdo.2@uc003rlp.1	AFE	0.0108344	NA	NA	NA	NA	0.51	0.56	0.49	0.69	0.36	0.23	0.8	0.48	NA	0.44	0.44	0.66	NA	NA	NA	NA	0.69	0.73	0.75	0.72	NA	0.79	0.64	0.76	NA	NA	0.59	0.59	NA
717@uc003rkq.2@uc003nyf.1uc003nyg.1uc003nyh.1	ALE	0.0339067	0.03	0.05	0.1	0.2	0.05	0.19	0.08	0.13	0.12	0.26	0.02	0.03	0.04	0.05	0.23	0.25	0.12	0.3	0.3	0.07	0.09	0.04	0.12	0.07	0.31	0.28	0.26	0.23	0.17	0.32	0.33	0.42	0.17
717@uc003rkq.2@uc003rkr.1uc003rks.1uc003rkt.1	ALE	0.0396794	0.08	0.08	0.14	0.09	0.04	0.04	0.05	0.3	0.06	0.09	0.04	0.08	0.05	0.01	0.09	0.09	0.04	0.2	0.11	0.07	0.14	0.05	0.07	0.06	0.14	0.09	0.13	0.09	0.1	0.08	0.33	0.31	0.14
717@uc003scl.1@uc003nye.2	ALE	0.0462667	0.53	0.56	0.55	0.48	0.52	NA	0.46	0.51	0.41	NA	0.59	0.52	0.4	NA	0.57	0.39	0.5	NA	NA	0.5	0.59	0.48	0.59	NA	NA	0.53	NA	0.57	0.57	NA	NA	NA	NA
717@uc003scl.1@uc003rkq.2	ALE	0.0213459	0.41	0.58	0.31	0.64	0.54	NA	0.52	0.49	0.69	NA	0.52	0.55	0.55	NA	0.45	0.48	0.51	NA	NA	0.53	0.35	0.44	0.41	NA	NA	0.52	NA	0.33	0.45	NA	NA	NA	NA
717@uc003sco.1uc003scp.1uc003scq.1@uc003nyf.1uc003nyg.1uc003nyh.1	ALE	0.0460165	0.94	0.95	0.86	0.94	0.99	0.92	0.96	0.74	0.96	0.88	0.99	0.99	0.97	0.97	0.89	0.91	0.96	0.72	0.88	0.98	0.86	0.99	0.97	0.89	0.82	0.91	0.72	0.96	0.93	0.86	0.65	0.65	0.78
717@uc003sco.1uc003scp.1uc003scq.1@uc003rkr.1uc003rks.1uc003rkt.1	ALE	0.0354736	0.06	0.07	0.16	0.07	0.01	0.1	0.03	0.3	0.04	0.2	0.01	0.01	0.04	0.03	0.08	0.09	0.05	0.28	0.18	0.03	0.11	0.02	0.06	0.13	0.22	0.1	0.41	0.05	0.07	0.14	0.35	0.38	0.25
721@uc003nzc.2uc010jtr.1@uc003nyz.2	AFE	0.001424	0.58	NA	0.5	0.5	0.48	0.42	0.54	0.45	0.53	0.54	0.52	0.42	0.49	0.5	NA	0.48	0.4	0.39	NA	0.52	0.53	0.49	0.55	0.58	0.55	0.59	NA	0.55	0.58	0.62	NA	NA	NA
7216@uc004dtx.1@uc004dtr.1uc004dtv.1	AFE	0.0370407	NA	NA	NA	0.61	0.5	NA	0.37	NA	NA	NA	0.49	NA	NA	NA	NA	0.47	NA	NA	NA	0.52	0.45	0.37	0.46	NA	NA	0.42	NA	0.36	0.39	NA	NA	NA	NA
7248@uc004ccd.1uc004cce.1@uc004ccc.1	ALE	0.00384881	NA	NA	0.67	0.65	0.62	0.7	0.61	0.57	0.61	0.75	0.85	0.39	0.78	0.75	NA	0.42	0.7	NA	0.73	0.49	0.64	0.5	0.56	NA	NA	0.56	0.51	0.45	0.3	0.3	0.56	0.53	0.46
728340@uc003jww.1@uc003jwx.2uc003jwy.2uc003jwz.2uc010ixh.1	ALE	0.00672713	0.4	0.3	0.14	0.33	0.24	0.36	0.14	0.63	0.35	0.49	0.13	0.26	0.15	0.68	0.32	0.17	0.22	0.48	0.14	0.45	0.06	0.09	0.3	0.16	0.33	0.21	0.25	0.16	0.13	0.11	0.08	0.2	0.15
728340@uc003jww.1@uc003jze.1	ALE	0.000850834	0.67	0.39	NA	0.38	0.53	0.57	0.41	0.75	0.37	0.38	0.51	NA	0.73	NA	NA	0.36	NA	NA	NA	0.64	0.33	0.53	0.33	0.33	0.5	0.26	NA	0.16	0.15	0.25	NA	0.18	0.3
728340@uc003kax.1@uc010iyk.1uc003kav.2uc003kau.2uc003kaw.2	ALE	0.0244901	0.36	0.27	0.09	0.33	0.25	0.43	0.16	0.55	0.38	0.56	0.14	0.25	0.12	0.57	0.37	0.19	0.25	0.43	0.14	0.5	0.08	0.1	0.38	0.1	0.33	0.29	0.23	0.18	0.17	0.13	0.06	0.26	0.19
728340@uc003mpi.1@uc003mpj.2uc003mpk.2uc003mpl.2uc010jlz.1	ALE	0.00424684	0.39	0.37	0.14	0.32	0.24	0.36	0.15	0.58	0.36	0.52	0.13	0.24	0.16	0.6	0.46	0.18	0.2	0.41	0.16	0.46	0.06	0.09	0.3	0.16	0.33	0.22	0.3	0.16	0.13	0.11	0.08	0.21	0.14
728340@uc003mrq.2@uc003mrn.2uc003mrm.2uc003mro.2uc010jms.1	ALE	0.0142081	0.38	0.3	0.12	0.34	0.25	0.41	0.17	0.51	0.38	0.56	0.15	0.26	0.11	0.55	0.48	0.2	0.21	0.48	0.13	0.51	0.08	0.1	0.36	0.11	0.36	0.28	0.24	0.19	0.17	0.13	0.06	0.24	0.2
728689@uc002dpi.2@uc002dqv.2	AFE	0.0405516	0.49	0.38	0.42	0.5	0.49	0.48	0.46	0.65	0.39	0.55	0.48	0.46	0.41	0.45	0.5	0.57	0.4	0.51	0.43	0.55	0.61	0.51	0.49	0.48	0.61	0.42	0.59	0.47	0.57	0.52	0.54	0.57	0.47
728689@uc002dqv.2@uc010byj.1	AFE	0.0103067	0.61	0.47	0.44	0.68	0.55	0.47	0.44	0.45	0.48	0.44	0.38	0.41	0.55	0.61	0.55	0.56	0.56	0.56	0.48	0.61	0.36	0.53	0.45	0.54	0.42	0.39	0.39	0.41	0.51	0.42	0.35	0.59	0.4
729085@uc003cmp.2@uc010hii.1	AFE	0.048268	NA	NA	0.49	0.49	0.53	0.72	0.64	NA	0.46	NA	0.61	0.6	0.6	0.58	NA	0.33	0.6	NA	NA	0.53	0.62	0.43	0.43	0.48	NA	0.42	0.39	0.36	0.46	NA	0.58	0.53	0.56
7307@uc002zdc.1@uc002zcy.1uc002zcz.1uc002zda.1uc002zdb.1	ALE	0.00674094	0.53	0.31	0.56	0.68	0.36	0.11	0.42	0.52	0.37	0.61	0.22	0.55	0.47	0.45	0.65	0.47	0.7	0.5	0.72	0.72	0.35	0.09	0.6	0.4	0.35	0.26	0.23	0.29	0.29	0.41	0.5	0.31	0.44
7355@uc004dlr.1@uc004dlo.1uc004dlp.1uc004dlq.1	AFE	0.0443204	NA	NA	NA	NA	0.57	0.41	0.42	NA	0.44	0.53	0.45	0.55	NA	0.35	NA	NA	0.44	NA	NA	0.5	NA	0.57	0.48	NA	NA	0.49	0.59	0.53	0.62	NA	NA	NA	NA
7403@uc004dgf.1@uc004dge.2	AFE	0.0440749	0.58	0.59	0.53	0.52	0.57	0.47	0.48	0.43	0.48	0.41	0.43	0.42	0.49	0.53	0.58	0.45	0.44	0.48	0.4	0.57	0.5	0.53	0.62	0.48	0.63	0.51	0.5	0.42	0.5	0.59	0.59	0.61	0.5
7456@uc002ujc.1@uc002uiy.1uc002uiz.1uc002uja.1	ALE	0.00980813	0.83	0.72	0.78	0.86	0.85	0.89	0.82	0.62	0.67	0.64	0.78	0.72	0.78	0.7	0.84	0.83	0.58	0.77	0.59	0.72	0.79	0.88	0.87	0.87	0.9	0.8	0.6	0.84	0.79	0.82	0.9	0.8	0.89
7456@uc002ujc.1@uc010fqt.1	ALE	0.0308663	0.83	0.74	0.83	0.86	0.88	0.91	0.85	0.73	0.71	0.7	0.82	0.76	0.78	0.75	0.89	0.85	0.66	0.78	0.68	0.72	0.77	0.89	0.89	0.89	0.93	0.84	0.61	0.85	0.81	0.84	0.92	0.81	0.91
7465@uc001mhu.2@uc001mhs.1uc001mht.1	ALE	0.0348283	0.09	0.12	0.14	0.16	0.12	0.12	0.2	0.34	0.15	0.15	0.15	0.09	0.18	0.1	0.15	0.09	0.06	0.43	0.12	0.16	0.17	0.13	0.16	0.16	0.12	0.19	0.36	0.19	0.26	0.19	0.09	0.2	0.2
755@uc010gps.1@uc002zep.2uc002zeq.2uc002zer.2	AFE	0.040923	0.55	0.63	0.47	0.45	0.34	0.11	0.52	0.17	0.6	0.58	0.12	0.68	0.08	0.61	0.29	0.46	0.63	0.61	0.59	0.73	0.48	0.08	0.13	0.51	NA	0.11	0.21	0.09	0.38	0.41	0.56	0.43	0.53
7551@uc010lgj.1@uc003ust.2	AFE	0.0279138	NA	0.46	0.42	0.39	0.58	NA	0.49	0.34	0.58	0.39	0.53	0.46	NA	0.55	NA	0.56	NA	0.46	0.52	0.5	NA	0.59	0.5	NA	NA	0.57	0.51	0.45	0.71	0.6	NA	NA	0.63
7553@uc003zej.1@uc003zeg.2uc010mge.1uc003zek.2	ALE	0.0200589	0.86	0.89	0.79	0.93	0.91	0.89	0.82	0.54	0.9	0.89	0.9	0.95	0.8	0.96	0.78	0.8	0.94	0.81	0.87	0.94	0.83	0.89	0.79	0.76	0.79	0.84	0.51	0.85	0.85	0.83	0.81	0.7	0.87
7582@uc001jaf.1uc001jag.1@uc009xmg.1	ALE	0.0173029	0.66	0.85	0.91	0.81	0.88	0.84	0.78	0.34	0.65	0.46	0.83	0.72	0.78	0.71	0.82	0.86	0.8	0.81	0.72	0.82	0.84	0.85	0.87	0.76	0.93	0.86	0.78	0.89	0.89	0.78	0.77	0.93	0.91
7594@uc002nqk.1@uc002nql.1	AFE	0.0392467	NA	NA	0.62	NA	0.41	0.55	0.58	NA	0.57	0.56	0.6	NA	NA	0.6	NA	0.45	0.48	NA	NA	0.52	NA	0.38	0.31	NA	NA	0.19	0.64	0.3	NA	NA	NA	NA	0.43
7594@uc002nqk.1@uc010ecv.1	AFE	0.0092684	NA	NA	0.49	0.5	0.42	0.62	0.38	NA	0.52	0.59	0.6	NA	0.51	0.56	NA	0.53	0.53	NA	0.54	0.42	NA	0.26	0.33	NA	NA	0.27	0.52	0.25	NA	NA	NA	NA	0.49
7739@uc004fgx.2@uc004fgu.2	AFE	0.0499907	NA	NA	NA	0.54	0.52	0.49	0.41	NA	0.5	NA	0.33	NA	NA	0.51	NA	NA	0.42	NA	NA	NA	NA	0.54	0.71	NA	NA	0.56	NA	0.5	NA	NA	NA	NA	NA
775@uc009zdy.1@uc0092056.uc001qkt.2	AFE	0.0441256	NA	NA	NA	NA	NA	NA	0.49	0.48	NA	NA	0.47	NA	NA	0.56	NA	0.4	NA	NA	NA	NA	0.62	0.54	0.59	NA	NA	NA	NA	NA	0.49	0.53	0.57	NA	NA
780@uc003rej.1@uc003ree.1	AFE	0.0362389	0.37	NA	0.5	0.36	0.39	0.57	0.55	0.37	NA	0.5	0.4	NA	0.56	0.56	0.44	0.5	0.45	0.38	NA	0.45	0.54	0.48	0.53	0.47	0.41	0.51	0.57	0.52	0.51	0.57	NA	0.5	0.64
7840@uc010fev.1@uc002sje.1uc002sjf.1	AFE	0.0359604	NA	NA	0.37	0.51	0.61	0.34	0.57	0.26	0.55	NA	0.1	NA	NA	0.12	NA	0.32	0.28	NA	NA	NA	0.72	0.62	NA	NA	NA	NA	0.5	NA	NA	NA	NA	0.51	0.58
7852@uc010fnk.1@uc002tuz.1	AFE	0.0182178	0.4	0.56	0.44	0.47	0.57	0.43	0.5	0.52	0.63	0.36	0.32	0.54	0.52	0.37	0.49	0.37	0.49	0.51	0.58	0.51	0.5	0.56	0.64	0.52	0.55	0.44	0.64	0.59	0.53	0.59	0.35	0.58	0.58
7871@uc003djc.1@uc003djd.1uc003dje.1uc003djf.1	ALE	0.0236692	0.94	0.95	0.95	0.92	0.98	0.94	0.96	0.55	0.92	0.93	0.97	0.94	0.96	0.91	0.93	0.99	0.9	0.88	0.93	0.95	0.97	0.97	0.95	0.96	0.98	0.96	0.71	0.95	0.98	0.99	0.96	0.95	0.94
7871@uc003djc.1@uc003djg.1uc003dji.1	ALE	0.0185137	0.94	0.95	0.94	0.91	0.98	0.94	0.96	0.56	0.92	0.93	0.97	0.93	0.96	0.9	0.94	0.99	0.9	0.85	0.93	0.94	0.97	0.97	0.95	0.95	0.98	0.96	0.77	0.95	0.98	0.99	0.96	0.94	0.95
78994@uc002dzb.1@uc002dyz.1	AFE	0.0220166	NA	0.55	0.65	0.53	0.58	0.6	0.63	0.58	0.49	0.51	0.65	0.67	0.62	0.6	NA	0.63	0.58	0.48	0.63	0.61	0.4	0.59	0.65	0.43	NA	0.64	0.59	0.48	0.15	0.54	0.5	0.47	0.43
79019@uc003bbp.1@uc010gyq.1uc003bbm.1uc003bbn.1uc003bbo.1	ALE	0.0255923	NA	NA	NA	0.12	0.05	0.05	0.03	NA	0.24	0.06	0.01	0.12	0.1	0.22	NA	0.06	0.03	NA	0.05	0.04	NA	0.03	0.13	0.28	NA	0.11	0.41	0.06	0.24	0.07	NA	0.38	0.13
79109@uc010mxc.1@uc010mxb.1	ALE	0.00968779	NA	NA	NA	0.48	0.49	NA	0.55	NA	NA	NA	0.45	NA	NA	0.59	NA	0.49	NA	NA	0.48	NA	NA	NA	0.62	0.62	NA	NA	NA	0.67	0.62	NA	NA	NA	NA
7919@uc003rgd.1@uc003rgi.1	AFE	0.0191339	0.7	0.73	0.52	0.64	0.69	0.66	0.44	0.65	0.71	0.8	0.83	0.85	0.76	0.58	0.58	0.7	0.65	0.59	0.76	0.83	0.58	0.74	0.53	0.58	0.59	0.51	0.68	0.64	0.57	0.84	0.33	0.57	0.45
7919@uc003ryf.1@uc003ryk.1	AFE	0.0354736	0.62	0.73	0.49	0.62	0.7	0.63	0.42	0.75	0.74	0.83	0.81	0.82	0.82	0.56	0.55	0.73	0.69	0.65	0.78	0.85	0.62	0.72	0.49	0.64	0.61	0.51	0.64	0.65	0.59	0.83	0.34	0.62	0.46
7919@uc003ryj.1@uc003ntv.1	AFE	0.0458338	0.69	0.86	0.82	0.94	0.96	0.95	0.94	0.81	0.87	0.96	0.93	0.94	0.94	0.89	0.8	0.94	0.93	0.78	0.84	0.94	0.9	0.93	0.76	0.77	0.82	0.91	0.85	0.9	0.83	0.92	0.83	0.75	0.85
7920@uc003rik.1@uc003nvz.1	AFE	0.0134263	0.49	0.49	0.53	0.44	0.51	0.46	0.5	0.56	0.52	0.53	0.51	0.48	0.58	0.55	0.46	0.47	0.43	0.54	0.52	0.52	0.41	0.44	0.45	0.45	0.5	0.61	0.41	0.48	0.47	0.42	0.54	0.4	0.45
7936@uc003rkx.1@uc003rkw.1	ALE	0.0226584	NA	0.37	NA	0.46	0.58	0.48	0.41	NA	0.51	NA	0.43	0.63	0.47	0.51	NA	0.6	0.55	NA	0.62	0.5	NA	0.4	0.41	NA	NA	0.5	NA	0.4	0.45	0.45	NA	NA	0.42
7940@uc003nuq.1@uc010kqa.1	AFE	0.0229	0.61	0.46	0.49	0.49	0.56	0.55	0.57	0.62	0.4	0.49	0.6	0.52	0.6	0.55	0.42	0.58	0.5	0.64	0.47	0.54	0.55	0.68	0.72	NA	0.63	0.71	0.52	0.53	0.63	0.55	0.58	NA	0.57
79415@uc002kez.1@uc002kfe.2	AFE	0.0308382	0.56	0.4	0.39	0.54	0.49	0.43	0.57	0.61	0.57	0.58	0.51	0.46	0.39	0.58	0.46	0.5	0.45	0.56	0.51	0.67	0.39	0.46	0.53	0.42	0.4	0.43	0.41	0.35	0.45	0.56	0.65	0.45	0.28
7942@uc003oqy.1@uc003oqx.1	ALE	0.034123	NA	NA	NA	NA	0.53	0.7	0.53	NA	0.61	NA	0.69	0.52	NA	NA	NA	NA	0.7	NA	NA	NA	NA	0.41	0.5	NA	NA	0.63	NA	0.36	0.39	NA	NA	NA	NA
79574@uc009wfo.1@uc009wfn.1	ALE	0.0474175	NA	NA	0.52	NA	0.49	0.49	0.47	NA	NA	0.54	0.49	NA	NA	NA	NA	NA	0.51	NA	NA	0.55	NA	NA	NA	NA	NA	0.43	NA	0.37	NA	NA	NA	NA	NA
79582@uc002veo.1@uc002vep.1	ALE	0.0461628	0.71	0.89	0.87	0.85	0.92	0.9	0.88	0.65	0.77	0.29	0.98	0.86	0.92	0.82	0.71	0.94	0.95	0.67	0.91	0.84	0.89	0.98	0.94	0.92	0.9	0.97	0.78	0.94	0.86	0.92	0.88	0.89	0.9
79639@uc001cmc.1uc001cmd.1@uc001cmb.1	ALE	0.0147347	0.3	0.45	0.67	0.43	0.51	0.51	0.47	0.78	0.52	0.3	0.41	0.53	0.51	0.61	0.14	0.58	0.47	0.51	0.52	0.52	0.43	0.42	0.28	0.3	0.4	0.43	0.51	0.45	0.38	0.55	0.42	0.36	0.34
79639@uc009vxh.1@uc001cmb.1	ALE	0.0323997	0.71	0.55	0.26	0.57	0.43	0.44	0.54	0.23	0.45	0.67	0.54	0.45	0.47	0.34	0.81	0.38	0.48	0.54	0.45	0.5	0.55	0.55	0.71	0.7	0.59	0.53	0.46	0.51	0.56	0.39	0.56	0.68	0.6
79651@uc002jrs.1@uc002jrr.1	ALE	0.0361947	0.71	NA	0.72	0.84	0.93	0.85	0.91	0.84	0.78	0.83	0.93	0.85	0.85	0.86	0.8	0.83	0.9	0.66	0.83	0.78	NA	0.91	0.84	0.72	0.31	0.77	0.75	0.84	0.8	0.74	0.61	0.83	0.7
79676@uc001udu.1@uc001uea.1	AFE	0.0499659	0.37	0.49	0.47	0.55	0.41	0.48	0.42	NA	0.56	0.48	0.52	0.48	0.64	0.47	0.43	0.47	0.5	NA	0.34	0.44	0.59	0.59	0.54	0.43	0.47	0.61	NA	0.5	0.39	0.55	0.59	NA	0.63
79676@uc009zxs.1@uc001uea.1	AFE	0.00674664	0.57	NA	0.59	0.58	0.51	0.47	0.56	NA	0.52	0.32	0.51	0.51	0.51	0.58	0.41	0.55	0.58	NA	0.48	0.55	0.46	0.49	0.46	0.41	0.39	0.48	0.44	0.37	0.51	0.38	0.6	0.48	0.37
79711@uc001wmt.1@uc001wmy.1	AFE	0.0147682	0.4	0.5	0.62	0.5	0.59	0.5	0.44	0.51	0.49	0.34	0.62	0.55	0.45	0.45	0.39	0.49	0.5	0.45	0.54	0.52	0.55	0.54	0.52	0.44	0.53	0.62	0.58	0.59	0.56	0.6	0.48	0.62	0.56
79767@uc002esc.1@uc002esa.1uc002esb.1	AFE	0.00297717	NA	0.38	0.22	0.45	0.21	0.21	0.2	0.24	0.47	0.75	0.22	0.52	0.29	0.47	NA	0.39	0.29	NA	0.59	0.21	NA	0.19	0.16	0.51	NA	0.16	0.08	0.16	0.36	0.21	NA	0.15	0.1
79778@uc003ski.2@uc003skj.2	AFE	0.0185315	0.53	NA	0.79	0.79	0.49	0.66	0.28	0.38	0.72	0.85	0.53	0.84	0.45	0.9	0.65	0.44	0.9	0.39	0.86	0.9	0.4	0.24	0.39	0.34	0.32	0.39	0.62	0.31	0.66	0.51	NA	0.74	0.7
79813@uc004coc.1@uc004coa.1	AFE	0.00596932	0.58	0.52	0.54	0.51	0.44	0.58	0.51	0.48	0.39	0.47	0.47	0.48	0.49	0.54	0.46	0.59	0.38	0.51	0.59	0.49	0.68	0.69	0.58	0.6	0.55	0.52	0.63	0.6	0.54	0.55	0.5	0.53	0.46
7982@uc003viv.1uc010lki.1@uc003vin.1uc003vio.1	AFE	0.0294081	NA	NA	0.48	0.47	0.49	NA	NA	NA	NA	NA	0.46	0.45	0.58	NA	NA	NA	0.51	NA	NA	NA	0.49	0.59	0.53	NA	NA	0.53	0.6	NA	0.6	0.56	0.51	NA	0.48
79822@uc002knd.1uc002kne.1@uc002knc.1	AFE	0.0186336	NA	NA	NA	0.42	0.25	NA	0.55	NA	0.54	0.44	0.41	NA	0.54	NA	NA	0.49	NA	NA	NA	NA	NA	0.64	0.56	NA	NA	NA	NA	0.63	NA	NA	NA	NA	NA
79838@uc002dgd.1uc002dge.2@uc002dgc.2uc002dgb.2	AFE	0.0400814	0.89	0.97	0.92	0.93	0.98	0.87	0.91	0.8	0.93	0.82	0.98	0.98	0.96	0.91	0.78	0.93	0.94	0.87	0.87	0.86	0.87	0.91	0.82	0.84	0.66	0.87	0.71	0.93	0.8	0.95	0.92	0.73	0.91
79869@uc001nrs.1@uc001nro.1uc001nrp.1uc001nrq.1uc001nrr.1	ALE	0.0201319	0.8	0.67	0.68	0.65	0.79	0.8	0.86	0.76	0.54	0.71	0.81	0.63	0.77	0.74	0.8	0.7	0.66	0.68	0.79	0.62	0.9	0.91	0.78	0.9	0.64	0.93	0.78	0.7	0.93	0.64	0.85	0.79	0.88
79869@uc009ynp.1@uc001nrs.1	ALE	0.0057951	NA	0.18	0.38	0.2	0.32	0.39	0.41	0.64	0.07	0.39	0.16	0.21	0.45	0.25	0.65	0.1	0.1	0.37	0.44	0.23	0.54	0.49	0.4	0.56	0.41	0.55	0.74	0.16	0.75	0.31	NA	0.6	0.65
79886@uc003zqb.1@uc003zqc.1	AFE	0.0202017	0.59	NA	0.41	0.51	0.37	0.25	0.61	0.37	0.62	NA	0.13	0.59	0.41	0.7	NA	0.14	0.81	NA	0.59	0.73	NA	0.09	0.16	0.7	0.24	0.08	0.39	0.14	0.2	0.18	NA	NA	0.51
79892@uc001ler.2@uc001les.1	AFE	0.0465289	0.53	0.52	0.18	0.49	0.28	0.2	0.13	0.01	0.82	0.78	0.24	0.88	0.36	0.81	0.53	0.3	0.85	0.62	0.9	0.86	0.39	0.27	0.2	0.4	0.53	0.15	0.05	0.23	0.25	0.45	0.25	0.38	0.35
79893@uc002hna.2@uc002hnb.1	ALE	0.0165548	0.28	0.18	0.24	0.24	0.14	0.26	0.29	0.44	0.25	0.52	0.21	0.29	0.11	0.36	0.27	0.28	0.41	0.34	0.26	0.39	0.1	0.13	0.15	0.14	0.15	0.23	0.79	0.19	0.18	0.22	0.25	0.2	0.35
79908@uc010jln.1@uc003mmq.1uc003mmp.1uc010jll.1uc010jlm.1	AFE	0.0483311	0.63	0.66	0.75	0.57	0.48	0.41	0.31	0.58	0.53	0.68	0.62	0.53	0.44	0.7	0.45	0.36	0.57	0.53	0.62	0.75	0.47	0.39	0.56	0.56	0.48	0.37	0.27	0.33	0.68	0.17	0.27	0.62	0.62
7991@uc003wws.1@uc003wwy.1	ALE	0.0352526	NA	NA	NA	0.5	0.5	0.5	0.54	NA	0.37	NA	0.76	NA	0.47	NA	0.52	0.61	0.57	NA	NA	0.55	0.63	0.68	0.57	0.55	0.45	0.7	NA	0.74	0.58	0.74	NA	0.6	0.56
79930@uc003mhh.2@uc003mhi.2	AFE	0.0348056	NA	NA	NA	0.53	0.43	NA	0.69	0.59	NA	NA	0.64	NA	0.58	NA	NA	NA	0.54	NA	NA	NA	NA	0.13	0.48	0.42	NA	0.41	0.47	0.59	0.51	NA	NA	NA	NA
79930@uc003mhh.2@uc003mhj.2	AFE	0.0406919	NA	NA	NA	0.53	0.65	NA	0.68	0.7	NA	NA	0.72	NA	0.65	NA	NA	NA	0.54	NA	NA	NA	NA	0.24	0.45	0.52	NA	0.58	0.66	0.6	0.38	NA	NA	NA	NA
79949@uc001lau.1@uc009xyc.1	AFE	0.0349448	0.62	0.43	0.6	0.5	0.5	0.43	0.5	0.56	0.59	0.57	0.64	0.51	0.5	0.56	0.65	0.56	0.52	0.55	0.55	0.52	NA	0.46	0.48	NA	NA	0.49	NA	0.43	0.55	NA	NA	NA	0.52
79982@uc003hvj.1@uc003hvl.1uc010ili.1uc003hvm.1	AFE	0.0231527	NA	0.51	0.54	0.32	0.66	0.53	0.52	NA	0.56	0.48	0.45	0.46	0.54	0.29	0.42	0.53	0.46	0.29	0.5	0.42	0.5	0.57	0.64	0.56	0.56	0.52	NA	0.54	0.55	0.39	0.57	0.52	0.52
800@uc003vry.2@uc003547.uc003vse.1	ALE	0.044714	0.01	0.02	0.01	0.02	0.01	0.01	0.01	0.08	0.04	0.01	0.01	0.01	0.01	0.02	0.02	0.01	0.02	0.04	0.01	0.02	0.01	0.01	0.02	0.01	0.01	0.01	0.02	0.01	0.01	0	0.01	0.01	0.01
800@uc003vse.1@uc003vsc.1uc003vsd.1	AFE	0.0323272	0.7	0.24	0.69	0.77	0.68	0.48	0.7	0.56	0.63	0.59	0.76	0.77	0.57	0.59	0.56	0.8	0.57	0.52	0.57	0.71	0.86	0.73	0.72	0.63	0.85	0.59	0.59	0.79	0.86	0.82	0.74	0.5	0.66
80014@uc003ivo.2@uc003ivn.2	AFE	0.0109476	NA	NA	NA	0.64	0.76	NA	0.78	NA	0.6	NA	0.64	0.78	0.7	NA	NA	0.55	0.66	NA	NA	0.59	0.5	0.59	0.67	0.56	0.56	0.53	NA	0.6	0.43	0.56	0.27	0.63	0.65
80022@uc002joq.2@uc010dgj.1	ALE	0.033003	0.03	0.01	0.02	0.06	0.02	0.03	0.04	0.01	0.01	0.01	0.03	0.01	0.17	0.01	0.03	0.04	0.06	0.05	0.01	0.01	0.35	0.02	0.03	0.07	0.18	0.03	0.01	0.02	0.11	0.09	0.1	0.05	0.02
80022@uc002jor.1@uc002jon.1	AFE	0.027431	0.03	0.02	0.02	0.13	0.07	0.03	0.14	0.07	0	0.01	0.05	0	0.05	0.01	0.02	0.09	0.05	0.05	0.01	0.01	0.08	0.09	0.07	0.11	0.04	0.05	0.14	0.04	0.09	0.05	0.11	0.04	0.02
80022@uc002jos.2@uc002jon.1	AFE	0.010762	0.04	0.02	0.03	0.12	0.11	0.04	0.15	0.07	0	0.01	0.07	0	0.15	0.01	0.03	0.13	0.06	0.08	0.02	0.01	0.51	0.1	0.07	0.14	0.11	0.07	0.16	0.05	0.13	0.12	0.15	0.07	0.03
80022@uc010dgj.1@uc002jon.1	AFE	0.0218618	0.02	0.03	0.02	0.11	0.08	0.03	0.16	0.07	0	0.01	0.05	0	0.06	0	0.02	0.09	0.05	0.09	0.02	0.01	0.14	0.09	0.06	0.11	0.04	0.05	0.17	0.04	0.12	0.06	0.17	0.04	0.02
80067@uc002ugw.1@uc010fqf.1uc002ugx.1	AFE	0.0122615	0.31	0.51	0.74	0.85	0.91	0.78	0.78	NA	0.79	0.67	0.5	0.73	0.53	0.81	0.7	0.8	0.65	NA	0.78	0.69	0.39	0.67	0.69	0.69	0.43	0.42	0.62	0.53	0.75	0.71	0.16	0.61	0.52
80149@uc001cbc.1@uc001cbb.2	AFE	0.0461994	0.73	0.52	0.81	0.74	0.75	0.88	0.71	0.73	0.69	0.73	0.73	0.81	0.84	0.66	0.63	0.66	0.8	0.68	0.84	0.82	0.59	0.69	0.79	0.6	0.71	0.74	0.72	0.72	0.51	0.69	0.55	0.63	0.81
80167@uc003ifu.1uc003ifv.2@uc003ifs.2	AFE	0.0243705	0.36	0.46	0.47	0.57	0.62	0.58	0.59	0.62	0.6	0.52	0.61	0.48	0.64	0.58	0.53	0.59	0.55	0.54	0.42	0.53	0.51	0.36	0.4	0.52	0.52	0.47	0.41	0.46	0.61	0.53	0.51	0.57	0.51
80173@uc003zqf.2@uc010mja.1uc010mjb.1uc003zqg.2	ALE	0.0400523	0.21	0.62	0.4	0.33	0.25	0.19	0.38	NA	0.31	NA	0.16	0.55	0.35	NA	NA	0.14	0.64	0.33	0.25	0.65	0.31	0.12	0.4	0.2	NA	0.08	0.33	0.13	NA	0.07	0.33	0.31	0.19
80183@uc001vbf.2@uc001vbh.2	AFE	0.00431473	0.62	NA	0.81	0.76	0.66	0.84	0.87	NA	0.85	0.86	0.88	0.89	0.85	0.83	NA	0.63	0.89	0.66	0.85	0.87	0.59	0.81	0.55	0.81	0.66	0.75	0.61	0.85	0.81	0.8	0.41	0.67	0.6
8019@uc004cex.1@uc004cev.2	ALE	0.0324722	0.61	0.7	0.85	0.91	0.83	0.7	0.71	0.67	0.84	0.77	0.81	0.91	0.83	0.86	0.79	0.82	0.93	0.72	0.71	0.66	0.79	0.75	0.68	0.78	0.68	0.76	0.78	0.8	0.72	0.69	0.6	0.66	0.56
80204@uc002rwg.1@uc002rwf.1	ALE	0.0427344	0.53	0.3	NA	0.14	0.39	0.56	0.62	NA	NA	0.44	0.37	0.56	0.48	0.55	NA	0.55	0.68	0.33	0.65	0.34	NA	0.68	0.43	0.65	0.35	0.63	NA	0.63	0.65	0.6	0.62	0.48	0.58
80206@uc010dnb.1@uc002kzr.1uc002kzs.1uc002kzt.1	AFE	0.0268436	NA	NA	NA	NA	0.56	NA	0.6	NA	NA	NA	0.42	NA	NA	NA	NA	0.61	0.53	NA	NA	NA	0.66	0.72	0.73	NA	NA	NA	NA	0.61	NA	NA	NA	NA	NA
80208@uc001zua.1@uc001ztz.1	ALE	0.0302954	NA	NA	NA	0.39	0.38	0.56	NA	NA	NA	NA	0.29	NA	NA	0.13	NA	0.23	0.29	0.53	0.52	NA	NA	0.51	NA	NA	NA	0.57	NA	0.56	0.61	NA	NA	NA	NA
80243@uc003xxt.2@uc003xxv.1	ALE	0.0470644	NA	NA	0.48	0.5	0.63	0.28	0.34	0.27	0.25	NA	0.43	NA	0.41	NA	0.28	0.23	NA	0.44	NA	0.1	0.6	0.57	0.33	NA	0.62	0.12	0.55	0.39	0.29	0.54	0.51	0.49	0.56
80254@uc003eql.1uc003eqn.1uc003eqo.1@uc003eqm.1	ALE	0.0218673	0.52	0.44	0.66	0.41	0.48	0.48	0.55	NA	0.55	0.47	0.48	0.37	0.49	0.56	0.48	0.34	0.43	0.55	0.45	0.48	0.62	0.67	0.52	0.4	0.64	0.55	0.42	0.51	0.6	0.58	0.59	0.61	0.48
8028@uc001iqz.1@uc001iqs.1uc001iqy.1	ALE	0.044146	0.5	0.63	0.5	0.4	0.49	0.53	0.57	0.57	0.59	0.72	0.54	0.66	0.5	0.88	0.5	0.41	0.53	0.33	0.53	0.66	0.32	0.51	0.57	0.44	0.46	0.52	0.81	0.44	0.38	0.57	0.4	0.3	0.41
80307@uc010gfg.1@uc002xcw.2uc002xcx.2	ALE	0.0177595	NA	NA	NA	0.35	0.3	0.17	0.17	NA	0.23	NA	0.12	0.15	0.26	NA	NA	0.33	0.62	NA	0.15	0.12	NA	0.55	0.2	NA	NA	0.43	NA	0.33	0.6	NA	NA	0.56	0.38
80331@uc002yhf.1@uc002yhg.1	ALE	0.0344152	0.92	0.97	0.95	0.95	0.97	0.99	0.93	0.96	0.99	0.99	0.99	0.99	0.97	0.98	0.9	0.97	0.93	0.78	0.99	0.98	0.92	0.98	0.94	0.93	0.92	0.97	0.87	0.95	0.96	0.98	0.87	0.86	0.95
80332@uc002wiq.1@uc010gaz.1	AFE	0.0469749	NA	NA	0.58	0.67	0.47	0.37	0.76	0.63	0.56	0.52	0.85	0.54	0.56	0.57	NA	0.58	0.37	NA	NA	0.52	0.67	0.77	0.71	0.39	0.61	0.63	0.69	0.75	0.67	0.58	0.67	0.66	0.52
80342@uc001hhl.1@uc001hhn.1uc001hho.1uc009xcr.1	ALE	0.0421797	NA	0.51	NA	NA	0.47	0.58	0.56	NA	NA	NA	0.48	0.46	NA	0.48	0.47	0.56	NA	NA	NA	0.41	NA	0.62	0.48	NA	NA	0.66	NA	0.52	0.69	NA	NA	NA	NA
80347@uc002iae.1@uc002iaa.1	AFE	0.0244422	0.28	0.23	0.21	0.2	0.22	0.26	0.31	0.4	0.15	0.06	0.15	0.05	0.14	0.24	0.23	0.26	0.16	0.25	0.07	0.07	0.22	0.21	0.32	0.26	0.55	0.16	0.23	0.29	0.34	0.11	0.49	0.32	0.27
80347@uc002iae.1@uc002iac.1	AFE	0.0434846	0.28	0.22	0.29	0.24	0.24	0.25	0.27	0.38	0.13	0.07	0.14	0.05	0.2	0.25	0.3	0.24	0.12	NA	0.08	0.07	0.25	0.21	0.29	0.2	0.53	0.2	0.24	0.29	0.33	0.14	0.48	0.4	0.28
80709@uc004bio.2@uc004biu.1	AFE	0.0269464	0.52	0.6	0.44	0.48	0.55	0.57	0.46	0.33	0.37	0.35	0.43	0.73	0.55	0.67	0.47	0.63	0.6	0.78	0.47	0.69	0.54	0.42	0.35	0.54	0.42	0.39	0.33	0.5	0.46	0.4	0.62	0.39	0.38
80709@uc004biw.1@uc0651.uc010mve.1	ALE	0.0200694	0.54	0.37	0.46	0.51	0.5	0.48	0.49	0.52	0.55	0.53	0.47	0.62	0.48	0.54	0.38	0.46	0.38	0.48	0.63	0.36	0.52	0.56	0.53	0.49	0.5	0.57	0.62	0.65	0.52	0.51	0.6	0.65	0.46
80824@uc001ran.1@uc001rao.1	AFE	0.00337293	0.48	0.22	0.41	0.24	0.34	0.42	0.44	0.55	0.33	0.22	0.33	0.12	0.43	0.34	0.25	0.2	0.28	0.51	0.11	0.1	0.63	0.25	0.48	0.46	0.54	0.42	0.85	0.32	0.42	0.52	0.52	0.36	0.57
80862@uc003rto.2@uc003rtn.1	ALE	0.0262049	NA	0.48	NA	0.53	0.6	0.64	0.51	NA	0.52	NA	0.55	NA	0.62	0.31	NA	0.51	0.55	0.4	0.49	0.77	0.52	0.7	0.71	0.55	0.56	0.52	NA	0.72	0.62	0.78	NA	0.62	0.56
81608@uc003had.1@uc003hac.1	AFE	0.0122791	NA	0.62	0.57	0.74	0.66	0.61	0.45	NA	0.76	0.61	0.54	0.61	0.72	NA	0.51	0.7	0.56	0.55	0.55	0.75	0.65	0.6	0.34	0.44	0.58	0.3	NA	0.48	0.41	0.65	0.46	0.6	0.42
81704@uc003zgk.1@uc003zgf.1	AFE	0.019788	NA	NA	NA	0.58	0.53	0.38	0.48	NA	0.47	NA	0.46	0.47	0.5	0.44	0.47	0.42	0.46	NA	0.61	NA	NA	0.6	0.57	0.52	0.56	NA	NA	0.54	0.57	NA	NA	NA	NA
81788@uc009xbj.1@uc001hce.1	ALE	0.0201424	0.72	0.77	0.79	0.77	0.87	0.89	0.94	0.77	0.82	0.96	0.95	0.95	0.83	0.8	0.84	0.65	0.92	0.81	0.85	0.92	0.84	0.78	0.78	0.76	0.63	0.78	0.85	0.75	0.82	0.91	0.74	0.38	0.69
81894@uc009xwk.1@uc001kpx.2uc001kpy.2	ALE	0.0107355	0.85	0.85	0.7	0.75	0.83	0.82	0.74	0.67	0.82	0.75	0.85	0.65	0.79	0.67	0.88	0.79	0.66	0.7	0.77	0.75	0.84	0.85	0.82	0.86	0.85	0.77	0.82	0.77	0.76	0.9	0.78	0.91	0.88
8263@uc004fnj.1@uc004fmv.1	AFE	0.0187439	0.69	NA	NA	0.73	NA	0.64	0.77	NA	0.84	0.86	0.93	0.86	0.68	0.86	0.69	0.87	0.81	0.64	0.85	0.89	0.68	NA	0.83	0.7	0.55	0.65	NA	0.62	0.64	0.77	0.65	0.83	NA
8289@uc001bmx.1@uc001bmt.1uc001bmu.1uc001bmv.1	AFE	0.0103708	0.64	0.35	0.14	0.18	0.19	0.36	0.12	0.69	0.02	0	0.14	0.01	0.16	0.01	0.39	0.12	0.01	0.1	0.02	0.02	0.39	0.42	0.26	0.32	0.28	0.17	0.4	0.25	0.24	0.3	0.18	0.23	0.2
831@uc010jbk.1@uc003klt.1	AFE	0.0177815	NA	0.49	0.36	0.53	NA	0.57	0.26	NA	0.52	0.24	0.22	0.7	0.59	NA	NA	NA	NA	0.54	0.72	0.57	NA	0.12	0.24	0.35	NA	0.37	NA	0.27	NA	0.2	NA	NA	NA
8310@uc003gle.1@uc003gld.2	ALE	0.0337424	0.79	0.8	0.87	0.94	0.91	0.91	0.93	0.73	0.88	0.88	0.96	0.87	0.83	0.93	0.77	0.93	0.88	0.81	0.83	0.84	0.88	0.97	0.8	0.77	0.76	0.87	0.74	0.78	0.75	0.82	0.8	0.82	0.85
8310@uc003gle.1@uc010idk.1uc003glc.2	ALE	0.0103004	0.81	0.74	0.86	0.95	0.89	0.93	0.94	0.77	0.88	0.89	0.96	0.89	0.81	0.95	0.79	0.93	0.91	0.83	0.84	0.89	0.88	0.96	0.79	0.75	0.75	0.84	0.69	0.81	0.8	0.83	0.71	0.76	0.86
83259@uc004fqn.1uc004fqo.1@uc004fql.1	AFE	0.0357701	NA	NA	NA	NA	0.33	NA	0.33	NA	NA	0.37	NA	NA	NA	NA	NA	NA	NA	NA	NA	NA	NA	0.58	NA	0.52	NA	0.64	NA	0.71	0.74	NA	NA	NA	NA
83259@uc004fqn.1uc004fqo.1@uc010nwg.1	AFE	0.0357701	NA	NA	NA	NA	0.38	NA	0.32	NA	NA	0.37	NA	NA	NA	NA	NA	NA	NA	NA	NA	NA	NA	0.54	NA	0.43	NA	0.53	NA	0.52	0.53	NA	NA	NA	NA
83259@uc004fqp.1@uc010nwg.1	AFE	0.0318884	NA	NA	NA	0.65	0.59	NA	0.49	NA	NA	0.28	0.53	NA	NA	NA	NA	NA	NA	0.6	0.56	NA	NA	0.69	NA	0.54	NA	0.74	NA	0.82	0.65	NA	NA	0.64	NA
83440@uc002avj.1@uc002ave.2uc002avi.2uc002avf.2	ALE	0.0456877	0.13	0.04	0.08	0.07	0.12	0.06	0.06	0.59	0.02	0.02	0.05	0.03	0.05	0.02	0.03	0.02	0.05	0.05	0.07	0.01	0.11	0.06	0.08	0.04	0.13	0.09	0.27	0.08	0.04	0.02	0.07	0.09	0.09
83661@uc009yne.1@uc001npv.1	ALE	0.00630968	0.06	0.05	0.04	0.06	0.12	0.1	0.13	0.15	0.11	0.03	0.02	0.04	0.19	0.03	0.04	0.08	0.1	0.34	0.05	0.06	0.16	0.05	0.08	0.27	0.29	0.18	0.28	0.12	0.19	0.14	0.12	0.11	0.09
83872@uc001grr.1@uc001grq.1uc001grs.1	ALE	0.0364868	NA	0.53	0.41	0.49	0.57	0.61	0.49	0.55	0.45	0.38	0.58	0.51	0.48	0.49	0.44	0.5	0.53	0.46	0.52	0.52	0.65	0.6	0.57	NA	0.59	0.52	0.43	0.69	0.59	0.47	NA	0.49	0.61
83998@uc001eih.1@uc001eif.1uc001eig.1	ALE	0.0316772	0.06	0.03	0.04	0.03	0.02	0.05	0.05	0.2	0.04	0.01	0.03	0.02	0.1	0.03	0.04	0.12	0.09	0.1	0.03	0.02	0.09	0.23	0.08	0.17	0.17	0.04	0.3	0.02	0.05	0.02	0.15	0.2	0.05
84146@uc001dny.1@uc001dnv.1uc001dnw.1uc001dnx.1	ALE	0.0125698	0.67	0.49	0.56	0.47	0.52	0.55	0.55	0.67	0.63	0.67	0.57	0.6	0.55	0.59	0.51	0.57	0.67	0.5	0.56	0.55	0.52	0.51	0.59	0.54	0.46	0.57	0.53	0.53	0.54	0.45	0.49	0.46	0.55
84152@uc002hsc.1@uc002hrz.1uc002hsa.1uc010cvx.1	AFE	0.00723148	0.4	0.51	0.44	0.61	0.36	0.51	0.55	0.55	NA	0.48	0.49	0.48	0.54	NA	0.48	0.43	0.46	NA	0.43	0.5	0.44	0.44	0.59	0.58	0.48	0.59	0.51	0.67	0.56	0.61	0.66	0.57	0.59
84162@uc003iei.1@uc003ieh.1	AFE	0.0138527	0.32	0.4	0.34	0.52	0.51	0.5	0.45	NA	0.5	0.44	0.5	0.36	0.62	0.35	0.4	0.52	0.41	0.43	0.4	0.4	0.44	0.6	0.57	0.48	0.75	0.47	0.59	0.44	0.68	0.47	0.6	0.52	0.38
84162@uc003iek.2@uc003ieh.1	AFE	0.0400143	0.35	0.47	0.45	0.49	0.49	0.48	0.41	0.47	0.43	0.5	0.63	0.47	0.38	0.35	0.5	0.5	0.47	0.53	0.58	0.61	0.54	0.47	0.51	0.49	0.54	0.47	0.56	0.41	0.57	0.57	0.57	0.53	0.68
84162@uc003iek.2@uc003iei.1	AFE	0.0367693	0.55	0.46	0.55	0.37	0.55	0.54	0.47	0.54	0.46	0.35	0.47	0.61	0.45	0.52	0.52	0.52	0.64	0.41	0.44	0.82	0.36	0.42	0.47	0.36	0.52	0.47	0.75	0.4	0.45	0.4	0.38	0.46	0.46
84162@uc003iel.1@uc003iei.1	AFE	0.0379518	0.57	0.59	0.46	0.58	0.41	0.52	0.64	NA	0.43	0.47	0.57	0.57	0.59	0.47	0.62	0.53	0.42	0.58	0.54	0.5	0.46	0.53	0.55	0.26	0.43	0.45	0.53	0.59	0.49	0.5	0.4	0.44	0.42
84196@uc001bfe.1@uc001bfa.1uc001bfb.1uc009vqc.1uc001bfc.1	ALE	0.0163195	0.46	NA	0.53	0.45	0.44	0.44	0.3	NA	0.47	0.43	0.39	0.43	0.36	0.54	0.52	0.42	0.54	0.56	NA	0.53	0.59	0.54	0.48	0.58	0.55	0.51	0.62	0.64	0.5	0.38	NA	NA	0.51
8451@uc010agu.1@uc010ags.1	AFE	0.0387209	NA	0.48	0.49	0.63	0.56	NA	0.6	NA	NA	NA	0.52	NA	0.61	0.59	NA	0.6	NA	NA	NA	NA	NA	0.45	0.54	NA	NA	0.5	NA	0.37	0.57	NA	NA	0.52	0.46
8452@uc010fwy.1@uc002vny.1	AFE	0.00344265	0.5	0.45	0.44	0.51	0.44	0.52	0.48	0.59	NA	NA	0.54	NA	0.45	NA	0.52	0.44	NA	NA	NA	NA	0.62	0.49	0.53	0.6	NA	0.54	0.64	0.54	0.63	0.57	0.52	0.49	0.62
84545@uc001ksa.1uc001ksb.1@uc001kry.1	ALE	0.0295032	0.49	0.38	0.52	0.35	0.49	0.47	0.37	0.46	0.43	0.32	0.48	0.36	0.6	0.45	0.5	0.54	0.4	0.53	0.46	0.46	0.45	0.64	0.53	0.56	0.47	0.51	0.49	0.56	0.51	0.44	0.7	0.51	0.41
84629@uc003soj.2@uc003soi.2	AFE	0.0266148	0.59	0.37	0.08	0.1	0.14	0.18	0.14	0.77	0.03	0.05	0.1	0.1	0.13	0.03	0.33	0.08	0.03	0.17	0.1	0.14	0.23	0.22	0.25	0.12	0.36	0.22	0.85	0.19	0.13	0.17	0.17	0.32	0.1
84678@uc001uaq.1@uc001uar.1	AFE	0.0254084	NA	NA	NA	0.46	0.27	0.55	0.45	NA	NA	NA	0.39	NA	0.45	0.42	NA	0.51	0.41	0.4	NA	0.27	NA	0.52	0.36	0.63	NA	0.43	0.55	0.58	0.5	0.54	0.42	0.57	0.49
84726@uc004cao.2@uc010mzj.1	AFE	0.0133797	0.51	0.54	0.51	0.44	0.41	0.55	0.5	0.48	0.56	0.48	0.49	0.53	0.5	0.14	0.44	0.42	0.53	0.65	0.35	0.5	0.63	0.55	0.5	0.57	0.53	0.57	0.62	0.62	0.54	0.43	0.62	0.61	0.33
8473@uc004ead.2@uc004eaa.1uc004eab.1	AFE	0.0483687	0.11	0.37	0.34	0.26	0.09	0.07	0.13	0.09	0.15	0.03	0.08	0.06	0.19	0.11	0.1	0.09	0.1	0.47	0.14	0.22	0.28	0.07	0.11	0.51	0.35	0.16	0.19	0.09	0.24	0.26	0.58	0.45	0.12
84879@uc001cex.1@uc001ceu.1uc001cev.1	AFE	0.042197	NA	NA	0.54	NA	NA	NA	NA	0.56	NA	NA	0.44	NA	NA	NA	0.67	NA	NA	0.56	NA	0.58	NA	0.51	NA	NA	NA	0.43	0.5	0.36	NA	NA	NA	NA	NA
84899@uc001vow.1@uc001vot.1	AFE	0.0498634	NA	NA	0.54	0.55	0.47	0.51	0.66	NA	0.5	0.5	0.53	NA	0.6	NA	NA	NA	NA	NA	NA	NA	NA	0.44	0.56	0.49	NA	0.43	NA	0.46	NA	0.47	NA	0.52	NA
84900@uc001twc.2@uc001twa.2	AFE	0.0390475	NA	0.34	NA	0.63	0.52	NA	0.22	0.55	0.5	NA	0.74	NA	NA	0.64	0.81	0.63	0.38	NA	NA	0.74	NA	0.12	0.61	NA	0.38	0.23	NA	0.33	0.48	NA	NA	NA	NA
84909@uc004auz.1@uc004avc.1	ALE	0.0293808	0.37	0.6	0.58	0.39	0.47	0.47	0.67	0.45	0.6	0.49	0.51	0.49	0.57	0.59	0.64	0.52	0.57	0.52	0.53	0.48	0.6	0.53	0.68	0.53	0.62	0.6	0.59	0.49	0.54	0.7	0.52	0.56	0.63
84958@uc001bnx.2@uc001bnv.1uc001bnw.1uc009vsu.1uc009vsv.1	ALE	0.0193719	NA	NA	NA	0.55	0.12	0.51	0.32	0.47	0.53	0.53	0.58	0.38	0.5	NA	0.48	0.46	0.51	NA	0.51	0.52	NA	0.02	0.03	0.21	NA	0.1	0.41	0.25	0.56	0.15	0.46	0.52	0.45
8496@uc001rhz.1@uc001rib.1uc001ric.1uc001ria.2uc001rid.1uc001rif.1	ALE	0.0255631	0.49	0.55	0.54	0.56	0.47	0.55	0.56	0.47	0.57	0.5	0.57	0.48	0.51	0.63	0.48	0.49	0.59	0.55	0.54	0.6	0.61	0.67	0.62	0.6	0.53	0.67	0.69	0.45	0.57	0.65	0.49	0.53	0.59
85007@uc003miy.1@uc003miz.1	AFE	0.0222522	0.53	0.28	0.43	0.28	0.09	0.13	0.12	0.05	0.78	0.71	0.1	0.69	0.18	0.79	0.26	0.1	0.78	0.32	0.73	0.71	0.23	0.11	0.06	0.33	0.26	0.08	0.06	0.08	0.24	0.25	0.23	0.15	0.24
85007@uc003mjc.1@uc003miz.1	AFE	0.0244901	0.6	0.42	0.45	0.3	0.12	0.19	0.18	0.18	0.72	0.58	0.12	0.72	0.19	0.75	0.43	0.15	0.61	0.26	0.61	0.65	0.31	0.2	0.11	0.45	0.27	0.12	0.13	0.17	0.34	0.13	0.37	0.08	0.22
85007@uc003mjd.1@uc003miz.1	AFE	0.0257115	0.47	0.21	0.4	0.33	0.12	0.1	0.15	0.14	0.81	0.7	0.09	0.66	0.2	0.8	0.36	0.11	0.76	0.32	0.63	0.77	0.3	0.08	0.11	0.37	0.26	0.09	0.09	0.11	0.22	0.29	0.24	0.19	0.16
8502@uc002uae.1@uc002tzz.1	AFE	0.00569262	0.47	0.47	0.42	0.6	0.5	0.47	0.5	0.45	0.47	0.5	0.5	0.46	0.56	0.49	0.53	0.54	0.49	NA	0.52	0.6	0.51	0.58	0.66	NA	0.56	0.52	0.49	0.57	0.69	NA	NA	0.65	NA
85441@uc002yfl.1@uc002yfm.2uc002yfn.2	AFE	0.00480288	0.51	0.33	0.61	0.66	0.49	0.54	0.64	0.82	0.51	0.18	0.54	0.33	0.44	0.58	0.31	0.61	0.48	0.5	0.4	0.47	0.81	0.57	0.48	0.56	0.8	0.6	0.67	0.64	0.52	0.55	0.74	0.84	0.63
85456@uc001njp.1uc001njq.1@uc009ymd.1	AFE	0.0371815	0.73	0.75	0.77	0.65	0.72	0.73	0.79	0.54	0.78	0.85	0.78	0.82	0.84	0.81	0.9	0.77	0.74	0.84	0.75	0.82	0.87	0.8	0.64	0.78	0.68	0.76	0.47	0.7	0.65	0.79	0.63	0.61	0.64
85464@uc010csc.1@uc002heo.1	ALE	0.0200485	0.85	0.92	0.88	0.73	0.89	0.86	0.75	0.73	0.93	0.95	0.93	0.96	0.83	0.9	0.87	0.83	0.87	0.93	0.92	0.89	0.92	0.91	0.75	0.84	0.67	0.82	0.8	0.89	0.82	0.8	0.79	0.79	0.8
8548@uc009wvp.1@uc001gfw.2uc001gfx.1uc001gfy.1	AFE	0.0155834	0.2	0.12	0.42	0.16	0.17	0.12	0.14	0.64	0.12	0.1	0.13	0.2	0.1	0.13	0.15	0.13	0.1	0.29	0.29	0.15	0.15	0.21	0.16	0.18	0.24	0.24	0.43	0.23	0.1	0.35	0.45	0.62	0.36
8568@uc010gpl.1@uc002zds.2	AFE	0.0334416	NA	NA	NA	NA	0.53	0.5	0.24	NA	NA	0.08	0.03	0.05	NA	NA	NA	0.06	NA	NA	NA	0.5	NA	0.62	0.6	NA	NA	0.25	NA	0.59	NA	NA	NA	NA	NA
8575@uc002umc.1@uc002umf.1	AFE	0.0370978	NA	0.45	NA	0.65	0.5	0.62	0.63	NA	0.69	0.56	0.51	0.48	0.62	0.48	NA	0.57	0.49	0.43	0.49	0.58	NA	0.52	0.42	0.54	NA	0.41	0.46	0.44	0.35	0.52	0.49	0.54	NA
861@uc002yuh.1uc002yui.1uc002yuo.1@uc010gmv.1uc010gmw.1	AFE	0.00975286	0.57	0.6	0.63	0.47	0.66	0.41	0.55	0.66	0.6	0.69	0.61	0.56	0.66	0.64	0.54	0.57	0.58	0.52	0.5	0.5	0.31	0.23	0.2	0.32	0.54	0.62	0.56	0.17	0.57	0.52	0.54	0.57	0.52
8648@uc010eyf.1@uc010eye.1	AFE	0.0484815	0.65	0.65	0.58	0.5	0.44	0.36	0.62	0.34	0.37	0.08	0.52	0.39	0.51	0.35	0.62	0.45	0.2	0.46	0.23	0.33	0.36	0.47	0.54	0.58	0.65	0.56	0.54	0.44	0.43	0.69	0.48	0.7	0.58
8662@uc003sma.2@uc003slz.1	AFE	0.00379278	0.52	0.68	0.7	0.48	0.39	0.33	0.4	0.39	0.77	0.82	0.43	0.89	0.41	0.7	0.71	0.71	0.76	0.59	0.83	0.82	0.6	0.34	0.29	0.45	0.19	0.45	0.48	0.43	0.36	0.41	0.41	0.37	0.46
8671@uc010iid.1@uc003hga.1	AFE	0.0191641	0.3	0.19	0.3	0.29	0.41	0.43	0.42	0.38	0.33	0.4	0.41	0.24	0.12	0.2	0.75	0.47	0.34	0.37	0.24	0.07	0.51	0.49	0.55	0.65	0.24	0.55	0.33	0.37	0.49	0.44	0.33	0.43	0.31
8694@uc003zbv.2uc010mfv.1@uc003zff.2uc010mgh.1	ALE	0.0105006	0.03	0.01	0.02	0.04	0.02	0.04	0.04	0.02	0.02	0.02	0.01	0.01	0.06	0	0.02	0.02	0.03	0.06	0.03	0.01	0.14	0.03	0	0.19	0.18	0.02	0.05	0.02	0.04	0.03	0.12	0.12	0.07
871@uc001owt.1@uc001owr.1	AFE	0.0440038	0.17	0.16	0.08	0.26	0.4	0.05	0.07	0.03	0.06	0.07	0.02	0.11	0.09	0.12	0.13	0.08	0.42	0.76	0.29	0.07	0.05	0.03	0.04	0.21	0.1	0.03	0.08	0.04	0.05	0.03	0.21	0.07	0.08
871@uc001owt.1@uc001ows.1	AFE	0.0461628	0.71	0.69	0.82	0.56	0.4	0.88	0.79	0.92	0.9	0.85	0.94	0.83	0.8	0.78	0.8	0.77	0.44	0.24	0.64	0.86	0.89	0.89	0.9	0.72	0.84	0.9	0.8	0.88	0.88	0.88	0.64	0.9	0.81
8714@uc002isk.2@uc002isl.1uc002isn.1	ALE	0.0182275	0.71	0.85	0.89	0.76	0.86	0.87	0.87	0.46	0.76	0.64	0.78	0.54	0.84	0.62	0.66	0.71	0.46	0.47	0.77	0.72	0.9	0.86	0.73	0.84	0.84	0.76	0.5	0.8	0.93	0.87	0.91	0.88	0.79
8714@uc002ism.2@uc002isk.2	ALE	0.0234279	NA	NA	0.54	0.34	0.31	0.3	0.44	0.27	0.26	0.21	0.2	0.23	0.34	0.21	0.43	0.23	0.18	0.3	0.3	0.1	0.65	0.27	0.32	0.51	0.59	0.23	0.23	0.27	0.69	0.46	0.72	0.49	0.28
873@uc010gmx.1@uc002yvb.1	ALE	0.0231765	0.99	0.99	0.99	0.99	1	1	0.99	0.98	0.99	1	1	1	0.98	1	0.99	0.99	0.98	0.97	0.99	1	0.98	1	1	0.96	0.97	0.99	0.94	0.99	0.99	0.99	0.93	0.97	0.93
873@uc010gmx.1@uc010gmy.1	ALE	0.0369271	0.98	0.98	0.99	0.97	0.99	0.99	0.97	0.95	0.99	0.99	1	1	0.97	1	0.97	0.98	0.97	0.94	0.97	0.99	0.96	0.99	0.99	0.9	0.92	0.98	0.86	0.99	0.99	0.97	0.89	0.95	0.86
8774@uc002kop.1@uc002kon.1	AFE	0.0372575	NA	0.46	0.6	0.62	0.44	0.52	0.48	0.51	0.6	NA	0.39	0.53	0.58	NA	NA	0.55	0.52	NA	0.48	0.62	NA	0.47	0.42	NA	0.54	0.37	0.32	0.43	0.41	0.52	0.57	NA	0.49
8775@uc002phe.2@uc002pha.1uc002phb.1uc002phc.1	ALE	0.031634	0.07	0.04	0.07	0.16	0.06	0.03	0.09	0.04	0.05	0.02	0.04	0.01	0.05	0.05	0.12	0.1	0.04	0.22	0.06	0.03	0.06	0.09	0.16	0.05	0.16	0.05	0.11	0.07	0.1	0.05	0.14	0.14	0.06
8848@uc001uzm.2@uc001uzn.2	AFE	0.0281113	0.05	0.05	0.04	0.03	0.03	0.03	0.03	0.03	0.04	0.02	0.02	0.08	0.03	0.06	0.02	0.02	0.03	0.1	0.01	0.05	0.01	0.01	0.04	0.02	0.1	0.03	0.01	0.02	0.05	0.01	0.02	0.01	0.02
8859@uc003rlf.1@uc010kqo.1	AFE	0.0382238	NA	NA	0.65	0.7	0.54	0.67	0.83	NA	0.78	NA	0.81	0.76	NA	0.24	0.4	0.53	NA	0.56	NA	NA	NA	0.83	0.78	NA	NA	0.87	0.6	0.82	0.79	0.71	NA	NA	NA
8908@uc004cqv.1@uc004cqx.1	AFE	0.0493652	NA	NA	NA	0.5	0.44	0.47	0.47	NA	0.62	NA	0.43	0.48	0.47	NA	NA	0.5	0.44	NA	NA	NA	NA	0.59	0.53	NA	NA	0.59	0.53	0.46	NA	0.62	NA	NA	NA
896@uc003orn.1uc003oro.1@uc003orp.1	AFE	0.0191595	NA	0.64	0.52	0.65	0.67	0.31	0.27	0.39	0.83	0.69	0.39	0.92	0.85	0.56	0.58	0.44	0.93	0.57	NA	0.52	NA	0.5	0.42	0.39	NA	0.51	0.47	0.38	0.55	0.35	NA	0.35	NA
89797@uc001mpv.1@uc009yhz.1	AFE	0.0155788	NA	NA	0.28	0.4	0.38	0.14	0.15	NA	0.06	0.12	0.04	0.15	NA	0.15	0.25	0.2	0.07	NA	0.28	0.1	0.53	0.3	0.13	0.38	NA	0.27	0.3	0.24	0.52	0.31	NA	NA	NA
89797@uc009yhy.1@uc001mpr.2uc009yhw.1	AFE	0.0325775	NA	NA	0.24	0.41	0.23	0.37	0.36	NA	0.22	0.07	0.12	0.26	0.25	0.36	0.35	0.6	0.13	NA	0.25	0.22	0.57	0.45	0.45	0.33	0.27	0.16	0.55	0.35	0.3	0.27	0.48	NA	0.4
898@uc002nsp.1@uc002nsn.1	AFE	0.0268831	NA	NA	NA	NA	0.41	NA	NA	NA	0.42	NA	0.44	NA	NA	NA	NA	NA	NA	NA	NA	NA	NA	0.54	0.56	NA	NA	0.54	0.53	0.46	NA	NA	NA	NA	0.56
89866@uc001glh.1@uc001gli.1	AFE	0.047947	0.21	0.14	0.06	0.49	0.14	0.19	0.21	0.22	0.23	0.32	0.07	0.07	0.19	0.06	0.08	0.22	0.27	0.52	NA	0.04	0.31	0.3	0.11	0.39	0.52	0.13	0.23	0.08	0.25	0.25	0.62	0.55	0.15
9016@uc004evo.1@uc004evr.1	AFE	0.0418981	NA	NA	NA	0.63	0.47	0.24	0.56	NA	0.52	0.53	0.57	NA	0.41	NA	0.43	0.53	0.55	NA	NA	0.52	0.5	0.62	0.58	0.59	NA	0.63	NA	0.66	0.65	0.55	0.51	0.63	0.46
90203@uc002xpy.1@uc002xpx.2	AFE	0.0463457	0.57	0.63	0.61	0.36	0.35	0.35	0.46	0.22	0.76	0.67	0.42	0.66	0.66	0.77	0.62	0.42	0.74	0.46	0.65	0.79	0.19	0.35	0.62	0.32	0.63	0.61	0.3	0.62	0.55	0.37	0.61	0.41	0.4
90203@uc002xpz.1@uc002xpx.2	AFE	0.023342	0.55	0.74	0.65	0.45	0.41	0.35	0.48	0.29	0.85	0.74	0.49	0.74	0.68	0.76	0.62	0.45	0.75	0.54	0.73	0.75	0.2	0.4	0.71	0.29	0.64	0.67	0.33	0.65	0.44	0.46	0.59	0.35	0.41
90627@uc010abh.1@uc001uuu.1uc001uuv.1uc001uuw.1uc001uux.1	ALE	0.00975286	0.43	0.45	0.45	0.5	0.48	0.63	0.44	0.43	0.43	0.35	0.49	0.51	0.42	0.49	0.53	0.36	0.4	0.57	0.44	0.51	0.59	0.53	0.61	0.56	0.47	0.4	0.56	0.52	0.59	0.51	0.5	0.5	0.5
9088@uc010bsy.1@uc002csm.1uc002csn.1uc002cso.1uc002csp.1uc002csq.1	ALE	0.0171278	NA	NA	NA	0.24	0.1	0.24	0.24	NA	0.32	NA	0.05	NA	0.32	NA	NA	NA	0.17	NA	NA	0.13	NA	0.36	0.36	NA	NA	0.12	0.36	0.32	NA	0.38	NA	0.26	0.32
90933@uc010jlq.1@uc003mne.1uc003mng.1	ALE	0.0464556	0.67	0.59	0.73	0.76	0.7	0.68	0.63	0.27	0.76	0.73	0.74	0.8	0.84	0.6	0.61	0.71	0.66	0.65	0.8	0.75	0.91	0.78	0.78	0.59	0.81	0.67	0.25	0.76	0.72	0.79	0.83	0.85	0.84
90957@uc002rrd.2@uc002rre.1	AFE	0.0441816	0.75	0.77	0.71	0.8	0.95	0.8	0.91	0.63	0.7	0.89	0.92	0.93	0.84	0.69	0.61	0.94	0.85	0.69	0.74	0.88	0.92	0.85	0.92	0.87	0.85	0.87	0.89	0.95	0.81	0.95	0.71	0.89	0.92
9112@uc001yra.1@uc001yqx.1	AFE	0.0300575	NA	NA	NA	NA	0.7	0.6	0.57	0.58	0.6	0.67	0.59	NA	NA	0.51	NA	0.62	NA	0.6	NA	0.63	NA	0.68	0.5	0.23	0.28	0.67	0.56	0.44	NA	0.26	NA	0.49	NA
9135@uc002gbj.2@uc002gbm.2uc002gbl.2	ALE	0.0265511	0.64	0.53	0.45	0.5	0.59	0.51	0.51	0.48	0.53	0.52	0.64	0.35	0.47	0.49	0.52	0.59	0.51	0.6	0.6	0.63	0.59	0.57	0.46	0.44	0.44	0.51	0.43	0.48	0.41	0.59	0.51	0.46	0.46
91351@uc003irs.1@uc003irt.1	AFE	0.0344243	0.55	NA	0.38	0.47	0.53	0.53	0.42	NA	0.41	0.52	0.51	0.33	0.46	0.46	NA	0.48	NA	0.47	0.47	0.51	NA	0.42	0.58	0.6	0.52	0.46	NA	0.56	0.55	0.63	NA	0.54	0.46
9138@uc002orw.1@uc002osc.2	ALE	0.0411255	NA	NA	NA	NA	NA	0.63	NA	0.29	NA	0.26	0.34	NA	0.33	NA	NA	0.39	NA	NA	NA	NA	NA	0.74	0.55	NA	NA	0.38	0.62	0.5	0.78	NA	NA	NA	NA
9138@uc002osd.1@uc002osc.2	AFE	0.0162168	NA	NA	NA	0.49	0.46	0.49	0.5	0.45	0.59	0.53	0.5	0.66	0.54	0.5	0.5	0.52	0.47	0.52	0.36	0.4	NA	0.62	0.48	0.54	NA	0.55	0.57	0.6	0.55	0.42	0.69	0.53	0.61
9138@uc002ose.1@uc002orz.1	AFE	0.0119727	0.54	0.49	0.6	0.6	0.55	0.56	0.47	0.53	0.55	0.49	0.49	0.6	0.54	0.51	0.38	0.52	0.47	0.42	0.59	0.57	0.5	0.48	0.49	0.49	0.39	0.36	0.56	0.53	0.42	0.45	0.53	0.37	0.42
91526@uc002uub.2@uc002uua.1	ALE	0.0330444	NA	NA	NA	0.67	0.57	0.72	0.47	NA	0.64	0.74	0.47	0.58	0.58	0.46	0.49	0.5	0.84	0.47	0.33	NA	0.29	0.41	0.33	0.44	NA	0.17	0.46	0.89	0.68	NA	0.24	0.42	0.58
91653@uc003eab.1@uc003eaa.1	AFE	0.00586332	NA	NA	NA	0.58	0.58	0.59	0.53	NA	0.57	NA	0.55	0.48	0.52	0.56	0.59	0.48	0.51	NA	NA	0.62	0.48	0.42	0.5	NA	0.5	0.54	0.48	0.54	0.52	0.57	0.46	0.39	0.43
91862@uc002fas.1@uc002fat.1	ALE	0.0462725	0.59	0.74	0.67	0.66	0.82	0.82	0.84	0.81	0.85	0.86	0.96	0.86	0.76	0.89	0.7	0.78	0.78	0.54	0.85	0.85	0.67	0.75	0.67	0.74	0.53	0.9	0.68	0.86	0.74	0.8	0.59	0.53	0.57
92291@uc002rno.1@uc002rnn.1	ALE	0.0449406	0.5	0.22	0.06	0.42	0.39	0.38	0.24	0.18	0.53	0.31	0.21	0.12	0.41	0.14	0.48	0.31	0.71	0.6	0.24	0.07	0.21	0.1	0.23	0.17	0.31	0.2	0.29	0.24	0.18	0.06	0.21	NA	NA
9256@uc002ivw.1@uc002ivx.2uc010dcs.1	AFE	0.0370482	NA	NA	NA	0.53	0.41	0.6	0.44	0.47	0.56	NA	0.46	0.45	0.55	0.55	0.45	0.45	0.3	NA	0.48	NA	NA	0.64	0.69	0.59	0.4	0.57	0.49	0.54	0.57	NA	NA	NA	NA
9260@uc003mhg.1@uc003mha.1uc003mhb.1uc003mhc.1uc003mhd.1	ALE	0.044742	NA	0.28	NA	0.11	0.32	0.05	0.09	0.5	0.16	0.11	0.13	0.05	0.11	0.23	0.62	0.03	0.39	0.46	0.32	0.12	0.05	0.05	0.08	0.14	0.06	0.13	0.34	0.02	0.09	0.08	0.08	0.17	0.11
92906@uc002rqv.1@uc002rqw.1	AFE	0.0324867	0.34	0.47	0.38	0.29	0.2	0.2	0.41	0.06	0.9	0.88	0.31	0.92	0.47	0.82	0.62	0.25	0.86	0.41	0.89	0.87	0.31	0.26	0.26	0.3	0.39	0.17	0.07	0.29	0.57	0.39	0.46	0.38	0.19
9360@uc002ufc.1@uc010fpy.1	AFE	0.00550173	NA	NA	NA	0.54	0.5	0.5	0.45	NA	0.54	NA	0.55	NA	NA	0.56	0.6	NA	0.58	NA	NA	0.52	0.5	0.41	0.44	NA	NA	0.39	NA	0.49	NA	NA	NA	NA	0.47
94104@uc002yql.1@uc002yqn.1uc002yqp.1uc002yqq.1uc002yqr.2	AFE	0.0142325	0.49	0.59	0.56	0.47	0.12	0.25	0.3	0.05	0.72	0.7	0.16	0.68	0.45	0.66	0.42	0.37	0.8	0.75	0.64	0.82	0.35	0.2	0.21	0.35	0.34	0.09	0.13	0.35	0.5	0.31	0.61	0.16	0.3
94104@uc002yqm.1@uc002yqn.1uc002yqp.1uc002yqq.1uc002yqr.2	AFE	0.0121886	0.35	0.74	0.65	0.67	0.36	0.39	0.47	0.03	0.88	0.66	0.39	0.89	0.6	0.88	0.5	0.57	0.82	0.81	0.91	0.81	0.46	0.47	0.44	0.45	0.43	0.3	0.24	0.57	0.67	0.48	0.56	0.22	0.26
94121@uc004egc.1@uc004egf.2uc004egg.2	AFE	0.0302576	NA	0.59	0.46	0.65	0.69	0.66	0.57	NA	0.59	0.26	0.41	NA	0.54	0.31	0.52	0.44	NA	NA	0.74	0.59	NA	0.23	0.54	NA	NA	0.43	NA	0.55	NA	0.21	0.19	0.54	0.42
94121@uc010nnb.1@uc004egd.2	AFE	0.00968818	0.65	0.71	0.68	0.68	0.59	0.71	0.75	NA	0.78	0.69	0.79	0.76	0.75	0.56	0.56	0.65	0.86	NA	0.78	0.85	0.28	0.69	0.56	0.54	0.69	0.61	0.39	0.82	0.5	0.44	0.78	0.61	0.44
9413@uc010moo.1@uc004ahg.2	AFE	0.00865801	NA	NA	NA	0.55	0.58	NA	0.72	NA	0.63	NA	0.68	NA	NA	NA	NA	NA	NA	NA	0.6	NA	0.65	NA	NA	NA	NA	0.78	0.73	0.76	NA	0.79	0.75	NA	NA
9414@uc004ahb.1@uc010mom.1	ALE	0.0485756	0.33	0.36	0.44	0.5	0.21	0.23	0.2	0.08	0.77	0.64	0.22	0.9	0.39	0.96	0.5	0.3	0.47	0.37	0.74	0.91	0.44	0.3	0.24	0.34	0.36	0.19	0.07	0.28	0.4	0.36	0.32	0.29	0.31
9491@uc002wep.2@uc002wel.2	AFE	0.0202785	NA	NA	NA	0.61	NA	NA	0.61	NA	0.61	0.49	0.38	NA	NA	NA	NA	NA	0.54	NA	0.58	NA	NA	0.63	0.68	NA	NA	0.61	NA	NA	NA	NA	0.64	NA	NA
9498@uc001ryp.1@uc001rym.1uc001ryn.1uc001ryr.1	ALE	0.040829	NA	0.36	0.41	0.49	0.38	0.44	0.44	NA	NA	NA	NA	NA	NA	0.33	NA	NA	NA	NA	NA	0.42	NA	0.6	NA	NA	NA	0.42	NA	0.61	0.55	NA	NA	NA	NA
9524@uc002mzf.1@uc002mza.1uc002mzd.1	AFE	0.0472777	NA	0.43	NA	NA	0.52	0.51	0.56	0.53	0.33	0.55	0.55	0.51	NA	0.56	NA	0.39	0.51	NA	0.58	0.62	NA	0.48	0.44	NA	0.49	0.52	0.48	0.5	0.4	0.45	NA	NA	NA
9557@uc009wji.1@uc001epm.2uc009wjh.1uc001epo.2	AFE	0.0313783	NA	0.53	0.56	0.55	0.61	0.51	0.57	NA	0.49	0.58	0.5	0.71	0.37	NA	NA	0.57	0.61	NA	0.53	0.57	0.47	0.52	0.4	0.49	0.51	0.45	NA	0.51	0.5	0.56	0.42	0.54	0.61
9589@uc010kjx.1uc003qsk.1uc003qsn.1@uc003qsl.1uc003qso.1	ALE	0.0440749	0.55	0.45	0.44	0.41	0.44	0.5	0.35	0.58	0.58	0.38	0.45	0.41	0.38	0.42	0.42	0.49	0.52	0.42	0.45	0.47	0.29	0.51	0.45	0.33	0.49	0.46	0.44	0.44	0.38	0.33	0.32	0.26	0.23
9611@uc010cpa.1uc010cpb.1@uc002gpp.1	ALE	0.0480304	0.44	0.42	0.53	0.56	0.57	0.42	0.51	0.62	0.47	0.48	0.39	0.4	0.43	0.41	0.44	0.43	0.48	0.5	0.39	0.47	0.5	0.52	0.45	0.52	0.52	0.56	0.52	0.52	0.43	0.5	0.45	0.49	0.53
962@uc001fwp.2@uc001fwo.1	ALE	0.0268826	0.18	0.22	0.8	0.53	0.48	0.5	0.33	0.59	0.38	0.1	0.41	0.53	0.58	0.31	0.13	0.45	0.27	0.75	0.23	0.3	0.76	0.53	0.42	0.28	0.53	0.48	0.6	0.43	0.58	0.6	0.5	0.54	0.79
9627@uc003ktc.1@uc010jcu.1uc010jcw.1uc010jcx.1	AFE	0.0278403	NA	NA	NA	0.61	0.52	0.55	0.55	NA	NA	NA	0.63	NA	NA	0.53	NA	NA	NA	NA	0.49	0.56	NA	0.5	0.56	NA	0.45	0.41	NA	NA	0.33	NA	NA	NA	0.32
9645@uc001mjy.2@uc001mjz.1uc001mka.1	ALE	0.0454776	NA	NA	0.63	0.76	0.87	0.65	0.73	NA	0.74	NA	0.79	NA	0.59	NA	NA	0.64	NA	NA	0.59	NA	0.61	0.68	NA	NA	NA	0.71	0.57	0.72	0.55	NA	0.51	NA	0.46
9649@uc004bqq.2@uc004bqo.1	ALE	0.0483875	0.51	0.62	0.68	0.6	0.62	0.37	0.42	0.72	0.42	0.63	0.49	0.43	0.57	0.58	0.52	0.78	0.53	0.73	0.47	0.38	0.72	0.54	0.78	0.55	0.63	0.52	0.69	0.53	0.62	0.59	0.68	0.62	0.8
9656@uc003nrf.2uc003nrg.2@uc003rvv.2uc003rvw.2	ALE	0.0425496	0.71	0.56	0.89	0.78	0.87	0.62	0.89	0.71	0.64	0.53	0.97	0.86	0.81	0.32	0.7	0.9	0.77	0.67	0.71	0.75	0.81	0.94	0.8	0.72	0.82	0.94	0.78	0.77	0.91	0.82	0.88	0.84	0.74
9656@uc003nrf.2uc003nrg.2@uc003rvx.1uc003rvy.1	ALE	0.0355198	0.12	0.32	0.08	0.18	0.21	0.36	0.11	0.34	0.4	0.37	0.07	0.3	0.18	0.71	0.58	0.12	0.17	0.41	0.4	0.27	0.11	0.09	0.21	0.11	0.24	0.04	0.15	0.22	0.05	0.43	0.15	0.17	0.17
9656@uc003nrh.1uc003nri.1@uc003rvx.1uc003rvy.1	ALE	0.0418408	0.87	0.76	0.94	0.79	0.78	0.52	0.88	0.67	0.61	0.8	0.92	0.8	0.8	0.74	0.58	0.88	0.85	0.67	0.67	0.71	0.95	0.9	0.8	0.94	0.7	0.94	0.84	0.81	0.94	0.77	0.8	0.76	0.8
9656@uc003rdt.2@uc003nrh.1	AFE	0.00654542	0.63	NA	0.55	0.6	0.25	0.71	0.34	0.4	0.53	0.73	0.36	0.46	0.29	0.68	0.35	0.17	0.57	0.44	0.61	0.51	0.36	0.21	0.24	0.21	0.25	0.16	0.37	0.48	0.49	0.23	NA	0.37	0.36
9656@uc003rvv.2@uc003nrf.2	AFE	0.0484815	0.1	0.23	0.07	0.2	0.22	0.45	0.12	0.33	0.42	0.18	0.08	0.19	0.19	0.25	0.37	0.12	0.15	0.32	0.33	0.28	0.05	0.11	0.2	0.06	0.32	0.06	0.16	0.19	0.07	0.22	0.17	0.24	0.17
9656@uc003rvv.2@uc003nrh.1	AFE	0.00725614	NA	0.54	NA	0.59	0.5	0.73	0.33	0.48	0.44	0.59	0.25	0.58	0.19	0.69	0.3	0.36	0.49	0.54	0.59	0.61	0.25	0.24	0.36	0.1	0.3	0.06	0.2	0.58	0.51	0.17	0.46	0.43	0.49
9659@uc001ema.2@uc001emf.1	AFE	0.0143059	NA	NA	0.66	NA	0.7	0.68	0.57	NA	0.72	0.82	0.62	0.82	NA	0.78	NA	NA	NA	NA	0.7	NA	NA	NA	0.68	NA	NA	0.55	0.67	0.57	0.37	0.55	NA	NA	NA
9659@uc001emb.1@uc001elm.2	AFE	0.0354428	0.89	0.95	0.81	0.88	0.84	0.91	0.85	0.83	0.86	0.69	0.88	0.96	0.91	0.96	0.94	0.74	0.83	0.89	0.96	0.92	0.77	0.92	0.87	0.78	0.76	0.89	0.76	0.79	0.83	0.81	0.6	0.86	0.93
9659@uc001emf.1@uc001elv.2uc001elw.2uc001elx.2	ALE	0.0256249	0.16	0.1	0.17	0.16	0.32	0.36	0.36	0.38	0.23	0.09	0.17	0.15	0.17	0.22	0.19	0.51	0.21	0.32	0.08	0.15	0.25	0.29	0.48	0.09	0.7	0.33	0.56	0.27	0.19	0.19	0.46	0.25	0.38
9698@uc001bsf.1@uc001bsg.1	AFE	0.0412809	0.36	0.49	0.4	0.54	0.52	0.5	0.65	0.36	0.54	0.46	0.46	0.53	0.51	0.52	0.51	0.46	0.55	NA	0.38	0.49	0.43	0.57	0.68	0.47	0.68	0.68	0.46	0.46	0.6	0.52	0.59	0.52	0.58
9704@uc002pgm.1@uc002pgl.1	AFE	0.0173779	0.5	0.49	0.32	0.53	0.58	0.46	0.42	0.51	0.4	0.46	0.56	0.37	0.54	0.4	0.65	0.45	0.47	0.35	0.38	0.3	0.54	0.64	0.42	0.57	0.49	0.58	0.55	0.57	0.44	0.58	0.62	0.39	0.56
9711@uc003fye.1@uc003fyf.1	AFE	0.0417497	0.77	0.7	0.73	0.69	0.91	0.84	0.76	NA	0.75	0.64	0.77	0.82	0.71	0.59	0.68	0.64	0.77	0.65	0.75	0.9	0.66	0.64	0.72	0.5	0.66	0.69	0.54	0.81	0.83	0.59	0.57	0.39	0.81
9732@uc003vgb.1@uc003vga.1	ALE	0.0068505	NA	NA	NA	0.68	0.74	0.63	0.69	NA	0.66	NA	0.74	NA	0.61	0.7	NA	NA	0.72	NA	NA	NA	NA	0.46	0.53	NA	NA	NA	NA	NA	0.45	NA	NA	NA	0.37
9734@uc003suc.1@uc003sue.1uc003sui.1uc003suj.1uc003suk.1	ALE	0.0233246	NA	NA	NA	0.43	NA	NA	0.48	NA	0.52	0.41	0.52	0.47	0.6	0.44	NA	0.53	NA	0.42	NA	NA	0.5	0.65	0.5	0.56	NA	0.61	NA	0.49	0.68	0.54	NA	NA	NA
9734@uc010kue.1@uc003suc.1	AFE	0.0132134	0.61	NA	0.58	0.71	0.76	0.47	0.78	NA	0.83	0.4	0.63	0.56	0.71	NA	0.18	0.64	0.73	0.67	0.74	NA	0.68	0.55	0.62	0.29	NA	0.57	0.12	0.52	0.47	0.35	NA	NA	0.53
9743@uc001qfb.2@uc009zco.1uc001qez.1uc009zcp.1	ALE	0.0294352	0.4	0.39	0.56	0.52	0.64	0.61	0.55	0.47	0.6	0.63	0.64	0.52	0.51	0.54	0.52	0.65	0.51	0.44	0.56	0.55	0.37	0.48	0.52	0.62	0.45	0.61	0.5	0.41	0.49	0.44	0.45	0.48	0.51
9759@uc002vyl.1@uc010fyy.1uc002vyk.2	ALE	0.0279952	0.75	0.79	0.77	0.84	0.81	0.92	0.89	0.69	0.8	0.81	0.81	0.85	0.75	0.87	0.8	0.88	0.79	0.76	0.66	0.87	0.87	0.91	0.93	0.82	0.8	0.89	0.64	0.82	0.89	0.85	0.87	0.91	0.84
9830@uc004ayd.1@uc004ayi.1	ALE	0.0463457	0.87	0.88	0.89	0.92	0.87	0.81	0.79	0.25	0.98	0.95	0.85	0.98	0.85	0.99	0.95	0.83	0.87	0.69	0.94	0.98	0.8	0.83	0.82	0.88	0.68	0.78	0.45	0.78	0.91	0.86	0.76	0.88	0.96
9843@uc010nks.1@uc004dwm.1uc004dwo.1uc010nkr.1uc004dwp.1	ALE	0.0499063	0.84	0.95	0.89	0.9	0.94	0.93	0.96	0.58	0.91	0.92	0.94	0.9	0.94	0.88	0.96	0.93	0.91	0.79	0.84	0.9	0.96	0.96	0.9	0.97	0.97	0.95	0.92	0.91	0.88	0.94	0.95	0.85	0.95
9857@uc001gnu.1@uc001gnr.1	AFE	0.0389904	0.7	0.58	0.79	0.8	0.69	0.66	0.64	0.16	0.89	0.88	0.71	0.92	0.83	0.94	0.78	0.87	0.79	0.77	0.92	0.95	0.47	0.73	0.68	0.57	0.8	0.64	0.34	0.69	0.73	0.85	0.86	0.54	0.72
9857@uc001gnw.1@uc001gnr.1	AFE	0.00832677	0.68	0.73	0.79	0.82	0.53	0.54	0.52	0.04	0.84	0.82	0.58	0.91	0.86	0.95	0.83	0.82	0.77	0.71	0.84	0.93	0.47	0.53	0.52	0.53	0.72	0.47	0.19	0.56	0.71	0.82	0.79	0.6	0.61
9857@uc001gnx.1@uc001gnr.1	AFE	0.0156879	0.68	0.79	0.82	0.83	0.58	0.57	0.57	0.05	0.91	0.85	0.63	0.92	0.86	0.94	0.82	0.83	0.81	0.79	0.85	0.92	0.54	0.58	0.58	0.56	0.74	0.52	0.24	0.6	0.75	0.87	0.83	0.6	0.65
9869@uc001evw.2@uc001evu.1	ALE	0.0340882	0.63	NA	0.74	0.8	0.86	0.86	0.88	0.73	0.81	0.88	0.78	0.65	0.77	0.85	0.3	0.84	0.82	NA	0.66	0.85	0.39	0.84	0.71	0.67	0.7	0.71	0.84	0.68	0.77	0.67	0.64	0.61	NA
9869@uc001evw.2@uc001evv.1	ALE	0.0167279	0.58	NA	0.72	0.81	0.86	0.82	0.85	0.78	0.75	0.85	0.79	0.68	0.77	0.91	0.37	0.84	0.75	NA	0.8	0.94	0.5	0.83	0.73	0.63	0.6	0.69	0.87	0.66	0.74	0.66	0.65	0.55	NA
9883@uc003twk.2@uc003twj.1	ALE	0.0417718	0.73	0.68	0.79	0.79	0.76	0.75	0.83	0.81	0.67	0.79	0.77	0.75	0.78	0.8	0.73	0.77	0.68	0.74	0.75	0.79	0.69	0.86	0.77	0.78	0.79	0.81	0.88	0.8	0.79	0.78	0.69	0.85	0.8
9883@uc003twk.2@uc010lam.1	ALE	0.0256373	0.54	0.63	0.44	0.69	0.62	0.76	0.73	0.69	0.51	0.26	0.52	0.33	0.43	0.58	0.55	0.7	0.36	0.58	0.54	0.65	0.4	0.84	0.65	0.58	0.76	0.66	0.81	0.79	0.7	0.67	0.51	0.66	0.66
9886@uc009xpd.1@uc001jlj.1	AFE	0.0357701	NA	NA	0.55	0.52	NA	NA	0.62	NA	NA	NA	0.59	NA	NA	NA	NA	0.62	NA	NA	NA	NA	NA	0.47	NA	NA	0.44	NA	NA	NA	0.45	NA	NA	NA	NA
9905@uc002fuq.1@uc002fum.2uc002fun.2	AFE	0.0411255	NA	NA	NA	NA	NA	0.47	0.54	0.41	NA	NA	0.62	NA	NA	0.61	NA	NA	NA	0.64	NA	NA	NA	0.23	0.44	NA	NA	0.28	0.46	0.1	0.55	NA	NA	NA	NA
9910@uc001gjz.2@uc001gjy.2	AFE	0.0125008	0.57	0.57	0.61	0.62	0.5	0.59	0.6	0.66	0.68	0.53	0.57	0.55	0.52	0.58	0.52	0.7	0.56	0.44	NA	0.55	NA	0.59	0.54	0.63	0.47	0.46	0.46	0.47	0.48	0.55	0.35	0.35	0.56
9910@uc001gkh.2@uc009wwq.1uc001gjx.1	AFE	0.0325838	NA	0.58	0.48	0.53	0.59	0.57	0.59	0.5	0.55	0.52	0.16	0.17	0.59	0.47	NA	0.58	0.54	NA	0.62	0.52	NA	0.23	0.29	0.44	NA	0.49	0.48	0.5	0.57	0.55	0.42	NA	0.25
9919@uc004chs.1@uc004chw.1uc010nbn.1	AFE	0.0423937	0.61	0.5	0.49	0.54	0.65	0.55	0.6	0.61	0.53	0.56	0.59	0.56	0.46	0.69	0.3	0.61	0.66	0.48	0.48	0.59	0.46	0.65	0.59	0.33	0.47	0.7	0.29	0.59	0.39	0.34	0.43	0.49	0.32
9924@uc001skw.2@uc001skx.2	AFE	0.0485756	0.66	0.58	0.75	0.68	0.49	0.65	0.64	0.43	0.4	0.17	0.65	0.76	0.79	0.32	0.38	0.78	0.47	0.61	0.48	0.27	0.66	0.64	0.7	0.83	0.59	0.62	0.73	0.62	0.91	0.48	0.81	0.7	0.61
9924@uc001skw.2@uc001sky.2uc001skz.2	AFE	0.0017301	0.31	0.4	0.52	0.37	0.33	0.27	0.45	0.39	0.32	0.1	0.43	0.57	0.54	0.21	0.26	0.49	0.34	0.55	0.22	0.21	0.48	0.43	0.51	0.58	0.59	0.42	0.66	0.4	0.62	0.31	0.58	0.72	0.56
9938@uc002sev.2uc002sew.1uc002sex.1@uc002seu.1uc010fdg.1	AFE	0.0190905	0.23	NA	0.41	0.26	0.38	0.43	0.39	0.34	0.17	0.61	0.38	0.35	0.44	0.64	0.7	0.38	0.47	0.23	0.29	0.51	0.65	0.49	0.57	0.53	0.38	0.55	0.59	0.44	0.5	0.29	0.61	0.65	0.42
9967@uc001cag.1@uc001cae.2uc001caf.2	ALE	0.0133719	0.31	0.46	0.26	0.29	0.36	0.41	0.33	0.27	0.39	0.29	0.37	0.43	0.35	0.46	0.37	0.36	0.37	0.3	0.41	0.39	0.32	0.41	0.31	0.22	0.3	0.35	0.2	0.36	0.29	0.35	0.24	0.27	0.28
chr1:100504668:100504768:+@chr1:100506218|100506296:100506439:+	A3SS	0.0215291	0.6	0.38	0.72	0.74	0.73	0.75	0.64	0.63	0.72	0.64	0.44	0.6	0.39	0.46	0.6	0.53	0.64	0.61	0.64	0.58	0.64	0.72	0.82	NA	0.54	0.65	0.76	0.8	0.73	0.61	NA	0.65	0.71
chr1:101126897:101127008:-@chr1:101116538:101116591:-@chr1:101115620:101116047:-	SE	0.0352556	NA	NA	0.81	0.31	0.66	0.47	0.43	0.48	0.52	0.43	0.55	0.59	0.44	0.57	0.58	0.26	0.57	NA	0.36	0.55	0.32	0.37	0.55	0.38	0.67	0.29	NA	0.13	0.4	0.32	0.5	0.39	0.39
chr1:101132777:101134147:-@chr1:101126972|101127008:101126897:-	A3SS	0.0148731	NA	NA	NA	0.5	0.39	0.39	0.34	0.49	0.54	NA	0.5	0.37	0.52	0.55	NA	0.56	NA	NA	0.45	0.3	0.44	0.66	0.55	0.62	NA	0.47	0.54	0.59	0.65	0.74	0.48	0.53	NA
chr1:101233254:101233992:-@chr1:101230884|101230898:101230781:-	A3SS	0.00477316	NA	NA	NA	0.51	0.49	NA	0.58	NA	0.53	0.6	0.66	0.54	0.53	0.47	NA	NA	NA	NA	0.46	NA	NA	0.45	0.47	NA	NA	0.37	NA	0.44	NA	NA	NA	NA	0.43
chr1:11056875:11056970:-@chr1:11056578:11056652:-@chr1:11054592:11054815:-	SE	0.035964	NA	NA	NA	0.67	0.68	0.69	0.58	NA	NA	NA	0.78	0.51	0.55	NA	NA	0.71	NA	NA	NA	0.65	NA	0.85	0.81	NA	NA	0.76	NA	0.73	0.75	NA	NA	0.62	NA
chr1:111464022:111464104:-@chr1:111463760:111463826:-@chr1:111461169:111463042:-	SE	0.044413	0.65	0.58	0.7	0.37	0.45	0.52	0.64	0.67	0.6	0.76	0.74	0.4	0.49	0.42	0.58	0.28	0.51	0.47	0.76	0.58	0.49	0.45	0.52	0.62	0.45	0.41	0.46	0.4	0.68	0.15	0.37	0.35	0.56
chr1:111484183:111484478:-@chr1:111483646:111483859:-@chr1:111481416:111481731:-	SE	0.0275565	NA	0.77	0.75	0.79	0.94	0.87	0.77	0.57	0.79	0.89	0.9	0.87	0.81	0.83	0.76	0.82	0.78	NA	0.65	0.88	NA	0.93	0.77	0.67	0.7	0.9	0.69	0.66	0.6	0.73	0.73	0.72	0.72
chr1:111484183:111484478:-@chr1:111483811|111483859:111483646:-	A3SS	0.0382346	NA	0.77	0.72	0.75	0.78	0.62	0.61	NA	0.81	0.84	0.59	0.83	0.6	0.55	0.75	0.72	0.84	NA	0.62	0.83	NA	0.65	0.74	0.68	NA	0.62	0.68	0.56	0.5	0.7	0.3	0.76	0.57
chr1:112921131:112921233:-@chr1:112915420:112915496:-@chr1:112900013:112900163:-	SE	0.010629	NA	NA	NA	0.63	0.56	0.6	0.59	NA	NA	0.57	0.59	NA	NA	NA	NA	0.64	NA	NA	0.57	0.62	NA	0.4	0.34	0.45	NA	0.71	0.52	0.46	NA	NA	0.45	NA	0.54
chr1:113018458:113018874:+@chr1:113018977|113018999:113019194:+	A3SS	0.0457185	NA	NA	NA	0.66	0.67	0.73	0.64	NA	NA	NA	0.66	NA	NA	0.71	NA	0.62	NA	NA	NA	NA	NA	0.75	0.73	NA	NA	0.67	NA	0.82	NA	NA	NA	NA	NA
chr1:114231394:114231726:-@chr1:114225918:114226142:-@chr1:114220959:114225285:-	SE	0.0421516	0.86	0.75	0.91	0.9	0.93	0.96	0.9	0.89	0.95	0.96	0.95	0.99	0.83	0.91	0.88	0.95	0.92	0.69	0.95	0.94	0.89	0.9	0.94	0.89	0.84	0.8	0.86	0.94	0.82	0.84	0.7	0.93	0.89
chr1:114914216:114914136|114914132:-@chr1:114911539:114912400:-	A5SS	0.0140017	0.47	0.54	0.64	0.8	0.86	0.85	0.85	NA	0.74	0.61	0.9	0.71	0.6	0.58	0.57	0.81	0.74	0.74	0.76	0.66	0.68	0.14	0.63	0.5	0.52	0.79	0.58	0.49	0.57	0.46	0.55	0.75	0.73
chr1:115028343:115028508:-@chr1:115024403:115024622:-@chr1:115023723:115023852:-	SE	0.0235701	NA	NA	NA	0.55	0.57	NA	0.66	NA	NA	0.71	0.68	NA	0.72	NA	NA	0.61	NA	NA	0.6	NA	NA	0.54	0.53	NA	NA	0.59	0.56	0.62	NA	0.41	0.35	0.62	0.56
chr1:115102069:115102198:-@chr1:115100921:115100983:-@chr1:115093965:115094351:-	SE	0.0182566	0.42	0.13	0.51	0.4	0.24	0.26	0.32	0.35	0.13	0.09	0.3	0.21	0.13	0.14	0.38	0.23	0.29	0.57	0.05	0.16	0.4	0.17	0.26	0.64	0.25	0.33	0.58	0.16	0.4	0.36	0.57	0.58	0.52
chr1:115102069:115102198:-@chr1:115100921:115101032:-@chr1:115093965:115094351:-	SE	0.0355815	0.32	0.06	0.27	0.28	0.19	0.21	0.25	0.4	0.11	0.07	0.24	0.17	0.11	0.11	0.39	0.2	0.22	0.55	0.04	0.12	0.34	0.13	0.19	0.57	0.2	0.26	0.54	0.12	0.35	0.26	0.48	0.42	0.35
chr1:120055883:120056306:+@chr1:120065316|120065402:120065467:+	A3SS	0.0139219	NA	NA	NA	0.86	0.79	NA	0.81	NA	NA	NA	0.79	NA	NA	NA	NA	0.8	0.84	NA	NA	NA	NA	0.78	NA	0.52	NA	NA	NA	0.66	NA	NA	NA	0.72	NA
chr1:1239544:1240205:-@chr1:1239164|1239348:1238975:-	A3SS	0.0277879	0.37	0.44	0.45	0.26	0.46	0.35	0.26	0.49	0.78	0.25	0.42	0.2	0.36	0.56	0.7	0.44	0.54	0.72	0.36	0.07	0.79	0.71	0.21	0.68	0.61	0.43	0.59	0.58	0.68	0.34	0.71	0.73	NA
chr1:1318033:1318046:-@chr1:1316009:1316818:-	RI	0.0232957	0.57	0.8	0.69	0.89	0.81	0.63	0.72	0.59	0.79	0.39	0.9	0.68	0.88	0.47	0.76	0.72	0.53	0.81	0.79	0.78	0.8	0.86	0.9	0.78	0.73	0.9	0.65	0.73	0.84	0.91	0.79	0.86	0.87
chr1:1320757:1320637|1320633:-@chr1:1318323:1318703:-	A5SS	0.045897	0.47	0.38	NA	0.54	0.45	0.49	0.47	NA	0.54	0.38	0.29	0.44	0.56	0.35	0.53	0.58	0.49	0.38	0.3	0.49	NA	0.71	0.53	0.56	0.4	0.41	0.53	0.57	0.51	0.53	0.54	NA	NA
chr1:13948443:13948569:+@chr1:13968121:13968255:+@chr1:13972160:13973241:+	SE	0.00205714	0.87	0.55	0.9	0.73	0.8	0.6	0.82	0.64	0.5	0.77	0.89	0.8	0.8	0.64	0.71	0.82	0.55	0.76	0.71	0.55	0.85	0.82	0.75	0.87	NA	0.91	0.86	0.85	0.86	0.84	0.84	0.85	0.86
chr1:13948443:13948569:+@chr1:13968200:13968255:+@chr1:13972160:13973241:+	SE	0.0207915	0.74	0.54	0.79	0.61	0.65	0.68	0.75	0.71	0.66	0.48	0.93	0.73	0.72	0.62	0.62	0.79	0.41	0.58	0.47	0.54	0.78	0.8	0.64	0.87	NA	0.82	0.62	0.73	0.81	NA	NA	0.76	0.68
chr1:1411025:1411081:+@chr1:1411353:1411478:+	RI	0.0334328	NA	NA	NA	NA	NA	0.43	0.48	NA	NA	NA	NA	NA	NA	NA	NA	0.42	0.36	NA	NA	0.48	NA	NA	0.5	NA	NA	0.48	0.52	0.52	NA	NA	NA	NA	NA
chr1:142535724:142536990:-@chr1:142512568:142512688:-@chr1:142510922:142511478:-	SE	0.00746342	0.49	0.43	0.64	0.53	0.45	0.57	0.55	0.5	0.4	0.5	0.42	0.5	0.51	0.37	0.41	0.49	0.59	0.55	0.61	0.75	0.49	0.21	0.35	0.46	0.61	0.34	0.53	0.27	0.21	0.39	0.42	0.5	0.33
chr1:143574675:143574799:-@chr1:143571116:143571355:-@chr1:143568969:143569085:-	SE	0.00442634	NA	0.14	NA	0.39	0.25	0.31	0.62	NA	0.52	NA	0.4	0.44	0.52	0.51	NA	0.57	NA	0.23	0.45	0.51	NA	0.6	0.67	NA	0.57	0.51	0.53	0.53	0.57	0.55	0.48	NA	0.73
chr1:144393380:144393451:+@chr1:144394932:144395004:+@chr1:144395942:144396035:+	SE	0.00980798	NA	NA	NA	0.53	0.59	0.51	0.45	NA	NA	NA	0.56	NA	0.51	NA	NA	0.63	0.53	NA	NA	NA	NA	0.4	0.55	0.44	NA	0.37	NA	0.47	0.47	NA	0.44	NA	0.4
chr1:148172127:148172459:-@chr1:148171923:148172047:-	RI	0.00271969	NA	0.74	0.62	0.69	0.62	0.78	0.69	0.67	0.89	0.91	0.91	0.69	0.56	0.8	0.59	0.73	0.73	0.51	0.66	0.66	0.3	0.71	0.68	0.49	0.73	0.33	0.27	0.58	0.54	0.59	0.59	0.66	0.5
chr1:148395729:148395833:+@chr1:148396190|148396203:148396304:+	A3SS	0.0221735	NA	NA	NA	NA	NA	NA	0.68	NA	0.73	NA	NA	0.69	NA	0.74	NA	0.63	NA	NA	NA	0.8	0.67	0.56	0.53	NA	NA	0.65	NA	NA	NA	NA	0.56	NA	NA
chr1:148505557:148505680:-@chr1:148504428:148505218:-	RI	0.00399405	0.79	0.71	0.58	0.64	0.8	0.71	0.63	0.37	0.67	0.76	0.65	0.84	0.6	0.78	0.72	0.73	0.68	0.84	0.81	0.84	0.6	0.65	0.66	0.6	0.66	0.58	0.36	0.73	0.69	0.48	0.6	0.63	0.53
chr1:148505559:148505680:-@chr1:148504428:148505218:-	RI	0.0127565	0.7	0.79	0.77	0.77	0.89	0.87	0.76	0.46	0.78	0.89	0.76	0.85	0.65	0.81	0.71	0.86	0.73	0.7	0.83	0.85	0.74	0.73	0.75	0.67	0.67	0.65	0.35	0.82	0.7	0.56	0.67	0.89	0.62
chr1:148507722:148508367:-@chr1:148506981:148507015:-@chr1:148506380:148506813:-	SE	0.0222838	0.61	0.61	0.44	0.52	0.49	0.6	0.28	0.52	0.56	0.74	0.55	0.52	0.79	NA	0.41	0.6	0.78	0.47	0.7	0.68	0.42	0.48	0.39	0.46	0.32	0.4	0.38	0.48	0.42	0.76	0.65	0.56	0.48
chr1:148507722:148508367:-@chr1:148506981:148507151:-@chr1:148506380:148506813:-	SE	0.0337126	0.82	0.76	0.81	0.86	0.9	0.96	0.94	0.9	0.95	0.94	0.95	0.98	0.93	0.97	0.76	0.92	0.98	0.77	0.93	0.97	0.62	0.93	0.93	0.86	0.57	0.94	0.92	0.89	0.74	0.9	0.88	0.76	0.89
chr1:148699160:148699417:+@chr1:148703627:148703827:+@chr1:148709661:148715808:+	SE	0.00425005	0.56	0.87	0.74	0.72	0.86	0.88	0.86	0.39	0.84	0.93	0.95	0.87	0.75	0.88	0.66	0.91	0.89	0.75	0.83	0.86	0.69	0.71	0.77	0.48	0.8	0.67	0.58	0.75	0.73	0.83	0.83	0.48	0.33
chr1:148866692:148866498|148866412:-@chr1:148862378:148864908:-	A5SS	0.0056859	0.55	0.17	0.17	0.38	0.25	0.05	0.25	0.3	0.13	0.18	0.15	0.12	0.27	0.11	0.35	0.16	0.11	0.32	0.2	0.06	0.27	0.18	0.17	0.5	0.62	0.19	0.41	0.24	0.37	0.32	0.46	0.45	0.36
chr1:148866692:148866567|148866412:-@chr1:148862378:148864908:-	A5SS	0.0222634	0.56	0.29	0.58	0.63	0.35	0.27	0.45	0.41	0.3	0.49	0.31	0.36	0.52	0.45	0.34	0.27	0.28	0.55	0.59	0.33	0.47	0.32	0.45	0.64	0.5	0.43	0.72	0.36	0.59	0.52	0.61	0.74	0.53
chr1:149213719:149214104:-@chr1:149208018:149208191:-@chr1:149207495:149207612:-	SE	0.0468837	0.89	0.87	0.92	0.93	0.95	0.96	0.98	0.93	0.93	0.96	0.98	0.97	0.8	0.98	0.9	0.98	0.96	NA	0.93	0.97	0.79	0.94	0.98	0.8	0.8	0.96	0.95	0.96	0.9	0.9	0.87	0.81	0.89
chr1:151996672:152000776:+@chr1:152001828|152001881:152001947:+	A3SS	0.00312246	0.67	0.64	0.45	0.87	0.75	0.72	0.62	0.62	0.72	0.7	0.8	0.72	0.62	0.59	0.6	0.65	0.41	0.59	0.71	0.52	0.45	0.51	0.65	0.44	0.55	0.59	0.51	0.45	0.57	0.64	0.52	0.45	0.62
chr1:152453674:152453557|152453513:-@chr1:152451558:152451724:-	A5SS	0.033558	0.7	0.61	0.76	0.83	0.56	0.83	0.78	NA	0.79	0.86	0.86	0.76	0.77	0.65	0.46	0.83	0.74	NA	0.79	0.7	0.63	0.69	0.73	0.68	0.49	0.76	0.74	0.86	0.36	0.65	0.52	0.34	0.77
chr1:152459442:152459898:-@chr1:152452993:152453046:-@chr1:152451558:152451724:-	SE	0.00050786	0.55	0.64	0.71	0.54	0.71	0.59	0.5	0.6	0.61	0.79	0.67	0.85	0.76	0.69	0.5	0.46	0.73	NA	0.66	0.76	0.42	0.55	0.52	0.66	0.24	0.52	0.39	0.52	0.43	0.66	0.24	0.4	0.29
chr1:152459442:152459898:-@chr1:152453513:152453674:-@chr1:152451558:152451724:-	SE	0.0131276	0.85	0.63	0.93	0.91	0.9	0.77	0.87	0.67	0.86	0.91	0.88	0.88	0.7	0.89	0.87	0.77	0.9	NA	0.93	0.95	0.85	0.74	0.87	0.63	0.47	0.88	0.85	0.76	0.86	0.77	0.66	0.84	0.86
chr1:152467715:152467825:+@chr1:152473666:152473859:+@chr1:152474296:152474391:+	SE	0.0346904	0.49	0.53	0.61	0.58	0.49	0.63	0.57	0.47	0.56	0.52	0.64	0.58	0.63	0.68	0.59	0.59	0.58	0.62	0.47	0.58	0.47	0.65	0.61	0.56	0.5	0.47	0.47	0.56	0.49	0.49	0.49	0.58	0.44
chr1:152511611:152511876:+@chr1:152512436|152512442:152512698:+	A3SS	0.0362931	0.83	0.69	0.68	0.73	0.8	0.74	0.81	0.81	0.86	0.89	0.75	0.81	0.83	0.91	0.78	0.83	0.73	NA	0.86	0.93	0.7	0.71	0.76	0.47	0.4	0.87	0.94	0.69	0.54	0.75	0.22	0.57	0.89
chr1:152576448:152576644:+@chr1:152579637:152579643:+@chr1:152579954:152580162:+	SE	0.0415618	NA	NA	NA	0.29	0.52	0.76	0.58	NA	0.37	0.35	0.27	0.48	0.31	0.47	NA	0.2	0.46	NA	NA	0.75	0.25	0.15	0.47	0.23	NA	0.55	NA	0.36	0.15	0.28	NA	0.22	NA
chr1:152669583:152669706|152669695:+@chr1:152673619:152673804:+	A5SS	0.0343397	NA	0.73	NA	NA	NA	0.74	0.67	NA	0.89	0.74	0.91	0.81	0.5	0.89	0.67	0.71	0.69	NA	0.77	0.74	0.65	0.82	0.72	0.7	NA	0.7	0.65	0.59	NA	NA	0.61	NA	0.65
chr1:153190332:153191021:-@chr1:153187466|153187501:153187233:-	A3SS	0.0352889	0.57	0.55	0.7	0.56	0.61	0.61	0.61	0.72	0.42	0.42	0.56	0.89	0.25	0.84	0.36	0.69	0.56	0.27	0.3	0.45	0.71	0.57	0.7	0.8	0.48	0.61	0.92	0.55	0.65	0.58	0.76	0.61	0.75
chr1:153213348:153213592:-@chr1:153212570:153212608:-@chr1:153209132:153209299:-	SE	0.0433469	0.51	0.56	0.64	0.29	0.38	0.69	0.58	NA	0.36	0.76	0.74	0.5	0.48	0.53	0.44	0.61	0.6	0.42	0.65	0.58	0.54	0.64	0.9	0.71	NA	0.61	NA	0.71	0.54	0.79	NA	0.76	0.4
chr1:153222473:153222497:+@chr1:153222942:153223166:+	RI	0.0401409	NA	NA	0.6	0.12	0.09	0.05	0.01	NA	0.1	0.15	0.01	0.08	NA	0.02	NA	0.06	0.11	NA	0.13	0.71	NA	0.46	0.33	NA	NA	0.18	0.56	0.07	0.57	0.45	NA	NA	NA
chr1:153249358:153249497:+@chr1:153250016:153250115:+@chr1:153253755:153254914:+	SE	0.0142162	0.63	0.56	0.35	0.43	0.37	0.36	0.36	0.69	0.46	0.32	0.47	0.54	0.49	0.55	0.41	0.45	0.51	0.65	0.52	0.55	0.4	0.27	0.35	0.56	0.33	0.3	0.52	0.21	0.31	0.21	0.58	0.3	0.47
chr1:153375399:153376822|153375476:+@chr1:153377079:153377198:+	A5SS	0.0347606	0.6	0.4	0.39	0.52	0.55	0.54	0.51	0.39	0.45	0.45	0.5	0.42	0.46	0.41	0.44	0.41	0.51	NA	0.62	0.48	0.42	0.62	0.53	NA	NA	0.49	0.48	0.57	0.56	0.56	0.49	0.58	0.52
chr1:153429201:153429383:-@chr1:153428698|153428725:153428598:-	A3SS	0.0121212	NA	NA	NA	0.72	0.7	0.64	0.77	NA	NA	NA	0.9	NA	NA	NA	NA	0.63	0.8	NA	NA	0.67	NA	NA	NA	NA	NA	0.55	NA	0.59	NA	0.6	NA	NA	NA
chr1:153487510:153487579:-@chr1:153486691:153487236:-@chr1:153484820:153484888:-	SE	0.049746	NA	NA	NA	NA	NA	NA	0.55	0.59	NA	NA	0.62	NA	NA	NA	NA	0.55	NA	NA	NA	NA	NA	NA	0.53	NA	NA	0.34	0.4	NA	NA	NA	NA	NA	NA
chr1:153545327:153546620:+@chr1:153548748:153548810:+@chr1:153554356:153554436:+	SE	0.0310209	0.65	0.64	0.55	0.66	0.81	0.83	0.63	0.53	0.67	0.87	0.96	0.71	0.87	0.66	0.7	0.45	0.78	0.47	0.7	0.64	0.44	0.76	0.62	0.51	0.54	0.59	0.53	0.82	0.52	0.86	0.53	0.58	0.34
chr1:153548670:153548810|153548694:+@chr1:153554356:153554436:+	A5SS	0.00568126	NA	NA	NA	NA	NA	0.54	NA	NA	NA	NA	0.64	NA	0.58	0.65	NA	0.51	0.55	NA	NA	0.58	0.36	0.35	NA	NA	NA	0.37	NA	0.47	0.42	NA	NA	NA	NA
chr1:153562279:153562325:+@chr1:153562995|153563025:153563547:+	A3SS	0.0457906	NA	NA	0.34	0.82	0.61	0.79	0.73	0.39	0.84	0.7	0.87	0.75	0.72	0.78	NA	0.76	0.79	NA	0.75	0.66	0.63	0.68	0.64	0.44	NA	0.61	0.6	0.77	0.5	0.86	0.63	0.56	0.69
chr1:153562279:153562325:+@chr1:153563025|153563313:153563547:+	A3SS	0.0271912	NA	NA	0.5	0.51	0.82	0.62	0.61	0.39	0.75	0.5	0.69	0.42	0.57	0.63	NA	0.56	0.62	NA	0.52	0.67	0.7	0.71	0.58	0.72	NA	0.57	0.66	0.72	0.63	0.62	0.63	0.74	0.69
chr1:153925345:153925935:-@chr1:153916797:153916871:-@chr1:153915824:153915927:-	SE	0.0102825	0.42	0.39	NA	0.41	0.49	0.46	0.35	0.42	0.48	0.47	0.56	NA	0.48	0.51	0.48	0.36	0.48	NA	0.37	0.65	0.54	0.46	0.63	NA	0.61	0.49	0.56	0.44	0.6	NA	NA	0.5	0.57
chr1:154202831:154202894:-@chr1:154202046:154202175:-@chr1:154201718:154201827:-	SE	0.0273567	NA	NA	0.56	0.44	0.59	0.66	0.59	NA	0.51	0.55	0.51	0.6	NA	0.5	NA	0.52	0.54	NA	NA	0.66	0.41	0.43	0.47	NA	NA	0.44	0.55	0.43	0.54	0.58	0.35	0.63	0.44
chr1:154248800:154248980:-@chr1:154248225:154248302:-	RI	0.0198583	NA	NA	NA	0.49	0.53	0.53	0.47	NA	0.6	0.62	0.49	NA	NA	0.53	NA	0.6	0.51	NA	0.46	0.63	NA	0.62	0.68	NA	NA	0.61	NA	0.55	0.7	NA	NA	NA	NA
chr1:154362970:154363066:+@chr1:154366242:154366323:+@chr1:154367032:154367283:+	SE	0.0396348	NA	NA	NA	NA	NA	0.33	0.52	NA	NA	0.49	0.42	NA	NA	NA	0.49	0.57	NA	NA	NA	0.53	NA	0.3	NA	NA	NA	0.37	NA	0.29	NA	NA	NA	NA	NA
chr1:154430354:154430662:+@chr1:154436250:154436887:+@chr1:154444301:154444428:+	SE	0.0481995	0.71	0.8	0.77	0.8	0.92	0.87	0.93	0.52	0.89	0.9	0.97	0.9	0.88	0.92	0.8	0.84	0.83	0.67	0.76	0.81	0.63	0.92	0.71	0.71	0.45	0.86	0.65	0.92	0.75	0.8	0.81	0.73	0.75
chr1:154449397:154449591:+@chr1:154461972:154462083:+@chr1:154468735:154468840:+	SE	0.0329388	NA	0.33	0.32	0.25	0.16	0.22	0.16	0.43	0.23	0.41	0.19	0.46	0.23	0.28	0.57	0.22	0.37	0.36	0.4	0.53	0.45	0.12	0.16	0.22	0.32	0.2	0.35	0.13	0.39	0.13	0.24	0.16	0.17
chr1:154470043:154470143:+@chr1:154472703:154472898:+@chr1:154478968:154479006:+	SE	0.0446592	0.53	0.58	0.58	0.41	0.5	0.55	0.47	0.53	0.58	0.49	0.46	0.45	0.39	0.39	0.53	0.5	0.48	0.44	0.48	0.5	0.55	0.51	0.33	0.61	0.56	0.64	0.56	0.45	0.55	0.61	NA	NA	0.53
chr1:154503885:154504093:-@chr1:154502922:154503093:-@chr1:154502196:154502795:-	SE	0.0141515	0.75	0.69	0.72	0.87	0.76	0.7	0.73	0.66	0.87	0.87	0.79	0.9	0.39	0.81	0.45	0.8	0.78	0.53	0.86	0.64	0.62	0.66	0.74	0.66	0.41	0.77	0.72	0.68	0.5	0.38	0.66	0.74	0.46
chr1:154981424:154981789:-@chr1:154980917:154980986:-@chr1:154980579:154980764:-	SE	0.00219014	0.55	0.37	0.4	0.38	0.39	0.4	0.48	0.66	0.64	0.59	0.45	0.59	0.37	0.66	0.67	0.43	0.66	0.61	0.7	0.65	0.35	0.35	0.44	0.4	0.16	0.42	0.48	0.39	0.36	0.38	0.33	0.4	0.54
chr1:15832521:15832647:+@chr1:15832880:15832961:+@chr1:15837389:15837516:+@chr1:15842604:15842732:+	MXE	0.049124	0.52	0.67	0.8	0.7	0.65	0.87	0.77	0.6	0.81	0.88	0.84	0.7	0.84	0.88	0.83	0.79	0.88	0.68	0.73	0.78	0.58	0.81	0.66	0.75	0.72	0.86	0.56	0.68	0.43	0.72	NA	0.56	0.74
chr1:159275294:159275407:-@chr1:159274965:159275108:-@chr1:159274045:159274489:-	SE	0.0255755	0.72	0.63	0.81	0.63	0.65	0.75	0.67	0.77	0.72	0.66	0.7	0.6	0.48	0.67	0.68	0.6	0.76	0.55	0.77	0.68	0.47	0.66	0.7	0.43	0.58	0.63	0.9	0.63	0.48	0.46	0.25	0.75	0.54
chr1:159413837:159413941:-@chr1:159413326:159413517:-@chr1:159412423:159412993:-	SE	0.0381678	NA	NA	NA	0.32	0.34	0.6	0.56	0.47	0.41	NA	0.22	0.22	NA	0.59	NA	0.41	0.36	NA	0.46	0.33	NA	0.11	0.37	0.27	NA	0.38	0.2	0.29	0.22	0.19	NA	0.51	NA
chr1:159439851:159439957:+@chr1:159440201:159440251:+@chr1:159442821:159443013:+	SE	0.00538417	0.58	0.47	0.66	0.25	0.54	0.5	0.56	0.49	0.64	0.54	0.46	0.52	0.46	0.55	0.3	0.4	0.62	0.39	0.8	0.75	0.17	0.48	0.53	0.29	0.27	0.42	0.34	0.43	0.62	0.29	0.24	0.3	0.48
chr1:159448765:159448894:+@chr1:159449006:159449068:+@chr1:159449504:159449596:+@chr1:159449794:159449889:+	MXE	0.047302	NA	0.35	0.43	0.8	0.62	0.73	0.7	0.7	0.47	0.66	0.64	0.64	0.84	0.49	0.57	0.71	0.25	NA	0.28	0.37	0.54	0.79	0.68	0.79	0.48	0.64	0.9	0.81	0.71	0.71	0.69	0.78	0.6
chr1:159947622:159948632|159947888:+@chr1:159949499:159950766:+	A5SS	0.0383786	NA	NA	NA	0.69	0.61	0.58	0.58	NA	NA	0.68	0.41	0.54	0.72	NA	0.46	0.55	0.81	NA	NA	NA	NA	0.29	0.61	0.68	NA	0.45	0.31	0.38	0.36	0.55	0.44	0.66	0.47
chr1:16141611:16141820:-@chr1:16141502|16141523:16141413:-	A3SS	0.0443204	NA	NA	NA	NA	0.41	0.62	0.71	NA	NA	0.28	0.31	0.14	NA	0.73	NA	0.63	0.18	NA	NA	0.62	NA	0.77	0.75	NA	NA	0.7	0.63	0.79	0.31	NA	NA	NA	NA
chr1:161439206:161439587:-@chr1:161398329:161398390:-@chr1:161388887:161389130:-	SE	0.0421923	NA	NA	0.56	0.4	0.56	0.57	0.64	0.68	0.6	0.65	0.72	0.85	0.65	0.66	0.44	0.72	0.79	0.5	NA	0.83	0.53	0.62	0.57	0.64	0.47	0.68	0.6	0.85	0.37	0.34	0.26	0.48	0.36
chr1:16566166:16566390:+@chr1:16586584:16586876:+@chr1:16589632:16589708:+@chr1:16590457:16590506:+	MXE	0.042197	0.31	NA	NA	NA	0.54	0.51	NA	NA	0.67	NA	0.59	NA	NA	NA	NA	0.31	NA	NA	NA	NA	NA	NA	0.26	0.18	NA	NA	NA	NA	0.34	0.29	NA	NA	NA
chr1:166000919:166001610:+@chr1:166009097:166009229:+@chr1:166023681:166027780:+	SE	0.0201946	0.62	0.76	0.74	0.58	0.48	0.68	0.55	0.55	0.59	0.46	0.64	0.56	0.79	0.33	0.64	0.57	0.4	0.44	0.52	0.53	0.69	0.81	0.66	0.68	0.61	0.66	0.43	0.68	0.85	0.84	0.91	0.62	0.45
chr1:166373027:166373685:-@chr1:166350318:166350411:-@chr1:166340339:166340756:-	SE	0.0278403	NA	NA	NA	NA	0.41	NA	0.54	NA	NA	NA	0.42	NA	0.44	0.56	NA	0.42	NA	NA	NA	NA	0.47	0.49	0.48	NA	NA	0.59	0.6	0.85	NA	0.56	0.58	NA	NA
chr1:172100436:172100666:-@chr1:172100065|172100267:172100018:-	A3SS	0.0481325	NA	NA	NA	0.23	0.49	0.61	0.33	NA	NA	NA	0.29	0.49	0.45	NA	NA	0.35	0.26	NA	0.6	0.37	0.44	0.54	0.54	0.55	NA	0.58	NA	0.64	0.4	0.45	NA	0.55	0.55
chr1:172100990:172101308:-@chr1:172100018:172100065:-	RI	0.0309787	0.69	0.62	0.7	0.74	0.79	0.83	0.78	0.7	0.77	0.67	0.82	0.74	0.8	0.76	0.64	0.77	0.82	0.59	0.83	0.78	0.42	0.93	0.75	0.56	0.61	0.54	0.59	0.83	0.68	0.79	0.45	0.66	0.43
chr1:172101934:172101967:-@chr1:172101618:172101655:-	RI	0.0226941	NA	NA	NA	0.4	0.45	0.52	0.51	NA	0.58	NA	0.47	NA	0.45	0.51	NA	0.39	0.37	NA	0.47	0.44	NA	0.49	0.38	NA	NA	0.66	NA	0.59	0.6	0.56	NA	0.54	0.57
chr1:173428619:173429058:-@chr1:173413370:173413443:-@chr1:173402321:173402496:-	SE	0.0380083	NA	NA	0.58	0.78	0.72	0.67	0.7	NA	0.65	0.44	0.76	0.77	0.74	0.78	NA	0.85	0.72	0.63	0.86	0.6	NA	0.77	0.58	0.79	0.42	0.57	0.68	0.55	0.6	NA	0.68	0.57	0.52
chr1:178112997:178113131:-@chr1:178101194:178101612:-@chr1:178091816:178091928:-@chr1:178088390:178088569:-	MXE	0.0267549	0.67	0.76	0.67	0.83	0.77	0.74	0.81	0.78	0.61	0.87	0.69	0.68	0.78	0.63	0.86	0.67	0.65	0.73	0.67	0.62	0.76	0.74	0.77	0.76	0.86	0.81	0.82	0.69	0.74	0.71	0.87	0.88	0.85
chr1:178120450:178120527:+@chr1:178123587:178123717:+@chr1:178125071:178125127:+	SE	0.029401	NA	NA	NA	0.4	NA	NA	NA	NA	NA	NA	NA	0.51	NA	0.4	NA	NA	NA	NA	0.5	NA	NA	0.61	NA	NA	0.59	0.56	0.62	NA	NA	NA	NA	NA	NA
chr1:178433099:178433792:+@chr1:178433793:178436052:+	TandemUTR	0.0279294	0.12	0.25	0.11	0.56	0.23	0.25	0.28	0.06	0.21	0.29	0.21	0.09	0.17	0.09	0.16	0.29	0.18	0.16	0.22	0.22	0.25	0.25	0.11	0.54	0.27	0.23	0.2	0.33	0.26	0.29	0.34	0.22	0.25
chr1:1812119:1812409:-@chr1:1760489:1760537:-@chr1:1746295:1746798:-	SE	0.0496053	0.81	0.78	0.48	0.63	0.9	0.78	0.91	0.82	NA	0.49	0.9	NA	0.54	0.69	0.59	0.87	0.38	0.71	0.69	0.67	0.92	0.79	0.93	0.8	0.63	0.83	0.89	0.91	0.85	0.81	0.69	0.73	0.72
chr1:182990246:182990670:-@chr1:182985304:182985349:-@chr1:182973368:182973468:-	SE	0.00641113	0.5	0.59	0.66	0.63	0.72	0.69	0.8	0.79	0.88	0.79	0.81	0.79	0.84	0.8	0.58	0.85	0.76	NA	0.84	0.89	0.57	0.68	0.74	0.34	0.75	0.73	0.61	0.78	0.67	0.56	0.51	0.43	0.74
chr1:19294626:19294733:-@chr1:19293987:19294106:-@chr1:19292892:19293220:-	SE	0.0161368	NA	NA	0.57	0.92	0.85	0.87	0.91	0.82	0.91	0.93	0.93	0.89	0.71	0.86	0.67	0.89	0.86	0.63	0.93	0.93	0.54	0.94	0.85	0.77	0.7	0.84	0.82	0.81	0.79	0.57	0.76	0.8	0.53
chr1:19434211:19434333:-@chr1:19433261:19433269:-@chr1:19432017:19432216:-	SE	0.0415647	NA	NA	NA	0.38	0.32	0.68	0.56	0.61	0.5	0.27	0.52	0.33	0.32	0.46	NA	0.54	0.36	NA	0.7	0.37	NA	0.56	0.72	NA	NA	0.56	0.52	0.79	0.6	NA	0.52	0.49	NA
chr1:198263353:198263662:+@chr1:198274452:198274523:+@chr1:198275409:198275546:+	SE	0.0398792	0.26	0.6	0.37	0.35	0.37	0.32	0.18	0.64	0.2	0.42	0.3	0.5	0.52	0.44	0.49	0.19	NA	NA	0.37	0.31	NA	0.22	0.6	0.57	0.42	0.72	0.59	0.36	0.73	0.29	0.52	0.75	0.44
chr1:199724601:199724735:-@chr1:199721034:199721127:-	RI	0.027527	0.08	0.02	0.05	0.25	0.01	0.01	0.02	0.02	0.01	0	0.01	0.02	0.02	0.04	0.41	0.01	0.05	0.46	0.24	0.03	0.01	0.02	0.02	0	0.01	0.01	0	0.01	0.02	0.03	0	0.01	0.06
chr1:199724606:199724735:-@chr1:199721034:199721127:-	RI	0.0365563	0.26	0.03	0.07	0.2	0.01	0.01	0.02	0.03	0.01	0	0.01	0.04	0.03	0.16	0.54	0.01	0.08	0.25	0.42	0.04	0.01	0.02	0.02	0	0.02	0.01	0	0.01	0.02	0.03	0.01	0.05	0.05
chr1:200231426:200232014:+@chr1:200233070|200233156:200233305:+	A3SS	0.0221292	0.76	0.8	0.89	0.78	0.83	0.88	0.92	0.67	0.81	0.88	0.97	0.95	0.86	0.89	0.72	0.89	0.89	0.6	0.93	0.95	0.77	0.84	0.78	0.68	0.56	0.86	0.75	0.93	0.79	0.74	0.76	0.79	0.78
chr1:200804898:200804948:+@chr1:200810753:200810933:+@chr1:200816225:200824320:+	SE	0.0243586	0.33	0.44	0.26	0.18	0.12	0.09	0.04	0.53	0.18	0.19	0.04	0.23	0.13	0.11	0.34	0.01	0.13	0.33	0.15	0.15	0.06	0.08	0.06	0.14	0.08	0.04	0.28	0.04	0.1	0.08	0.11	0.16	0.14
chr1:202031374:202031526:+@chr1:202032044:202032247:+@chr1:202037326:202038767:+	SE	0.00838663	0.48	0.57	0.41	0.15	0.33	0.56	0.32	0.42	0.38	0.19	0.33	0.4	0.24	0.64	0.57	0.33	0.77	0.28	0.09	0.45	0.32	0.3	0.18	0.26	0.13	0.37	0.34	0.34	0.12	0.22	0.28	0.07	0.31
chr1:203217549:203217771:+@chr1:203223169|203223176:203223291:+	A3SS	0.024741	NA	NA	NA	NA	NA	NA	0.6	0.7	NA	NA	0.8	NA	NA	NA	NA	0.7	NA	NA	NA	NA	NA	0.59	0.41	NA	NA	0.58	0.45	0.5	0.66	NA	NA	NA	NA
chr1:205272547:205272724:-@chr1:205267462:205267647:-@chr1:205264855:205265032:-	SE	0.00485143	0.6	0.67	0.82	0.57	0.73	0.78	0.79	0.29	0.76	0.82	0.47	0.61	0.49	0.67	NA	0.51	0.64	NA	0.63	0.66	0.37	0.62	0.38	NA	0.42	0.59	0.37	0.39	0.45	0.36	0.72	0.47	0.64
chr1:206139789:206139971:-@chr1:206138941:206139194:-@chr1:206137461:206137541:-	SE	0.0408113	NA	NA	0.63	0.75	0.7	NA	0.74	NA	0.71	0.72	0.69	0.76	NA	NA	NA	0.65	NA	NA	NA	0.6	0.73	0.68	0.68	0.71	NA	0.58	NA	0.66	0.68	0.42	0.62	0.57	0.43
chr1:207999950:208000352|208000292:+@chr1:208002483:208002630:+	A5SS	0.0226405	NA	NA	NA	0.36	0.43	0.64	0.63	NA	NA	NA	0.74	0.85	0.47	0.48	NA	NA	0.56	NA	NA	0.46	NA	0.8	0.83	NA	NA	0.84	0.76	0.85	0.59	NA	NA	NA	NA
chr1:208070076:208070115:+@chr1:208070771|208070775:208071011:+	A3SS	0.00657045	NA	NA	NA	0.76	0.74	0.69	0.66	NA	NA	0.8	0.83	NA	0.44	NA	NA	0.69	0.64	NA	NA	NA	NA	0.91	0.81	NA	NA	0.87	NA	0.83	0.82	NA	NA	NA	0.82
chr1:208091415:208091741:+@chr1:208091742:208092151:+	TandemUTR	0.00997855	NA	NA	0.62	0.5	0.73	0.65	0.53	NA	0.47	0.6	0.82	0.47	0.75	0.62	NA	0.65	NA	NA	0.64	0.67	0.46	0.43	0.63	0.49	NA	0.59	0.46	0.47	0.7	0.41	0.54	0.6	0.46
chr1:210672331:210673085:+@chr1:210682511:210682590:+@chr1:210684304:210684407:+	SE	0.0414576	NA	0.45	0.74	0.8	0.77	0.75	0.8	0.81	NA	0.93	0.76	0.87	0.69	0.6	0.71	0.72	0.91	NA	0.86	0.77	0.43	0.7	0.8	0.76	0.63	0.74	0.81	0.67	0.44	0.32	NA	0.78	0.65
chr1:210672331:210673085:+@chr1:210682530:210682590:+@chr1:210684304:210684407:+	SE	0.0223583	NA	0.48	0.82	0.86	0.86	0.86	0.85	0.91	NA	0.87	0.84	0.9	0.73	0.69	0.74	0.8	0.93	NA	0.81	0.82	0.56	0.78	0.88	0.86	0.6	0.79	0.83	0.79	0.57	0.46	0.72	0.78	0.68
chr1:21149083:21149191:-@chr1:21140571:21141410:-@chr1:21103963:21104051:-	SE	0.0385004	0.55	0.35	0.54	0.47	0.61	0.69	0.56	0.48	0.63	0.49	0.57	0.4	0.57	0.49	0.57	0.51	0.49	0.42	0.51	0.49	0.54	0.55	0.62	0.61	0.47	0.51	0.63	0.51	0.6	0.67	0.55	0.63	0.62
chr1:215179547:215179638:-@chr1:214955039:214955214:-@chr1:214947324:214947451:-@chr1:214917041:214917456:-	MXE	0.0405991	NA	0.48	0.32	NA	NA	0.59	0.43	NA	NA	0.63	0.34	0.22	0.53	0.43	0.5	NA	0.46	NA	NA	0.41	NA	0.4	0.18	0.33	NA	0.3	NA	0.43	NA	0.44	0.36	NA	0.28
chr1:218286308:218286628:-@chr1:218280150:218280231:-@chr1:218274879:218274978:-	SE	0.0223433	0.8	NA	0.8	0.63	0.84	0.76	0.83	0.69	0.91	0.97	0.85	0.87	0.87	0.92	NA	0.76	0.88	NA	0.7	0.86	0.68	0.83	0.8	0.64	0.5	0.88	0.75	0.89	0.69	0.66	0.75	0.64	0.75
chr1:22224586:22224723:+@chr1:22226494:22226614:+@chr1:22229360:22230303:+	SE	0.0212178	0.31	0.64	0.76	0.4	0.22	0.43	0.2	0.53	0.14	0.51	0.3	0.42	0.37	0.29	0.24	0.49	0.32	0.48	0.3	0.35	0.55	0.5	0.54	0.55	0.37	0.3	0.81	0.36	0.67	0.73	0.25	0.52	0.53
chr1:222566125:222566449:-@chr1:222562316:222562588:-@chr1:222559359:222559491:-	SE	0.0475866	NA	NA	0.71	0.83	0.84	0.76	0.88	NA	0.71	NA	0.88	0.74	0.81	0.8	0.71	0.89	0.78	NA	0.63	0.66	0.59	0.92	0.88	0.83	0.74	0.9	NA	0.89	0.9	0.9	0.79	0.78	0.86
chr1:225270404:225270521:-@chr1:225259318:225259435:-@chr1:225249147:225249304:-	SE	0.0161476	0.61	0.34	0.6	0.63	0.75	0.77	0.65	NA	0.72	0.74	0.75	0.77	0.69	0.8	0.59	0.73	0.59	NA	0.74	0.8	0.76	0.44	0.64	0.61	0.6	0.64	0.59	0.73	0.36	0.48	0.54	0.64	0.51
chr1:225982843:225983110:+@chr1:225985909:225986036:+@chr1:226002016:226002557:+	SE	0.0472126	0.54	NA	0.33	0.45	0.37	0.47	0.31	NA	0.26	0.48	0.45	0.48	0.45	0.34	0.7	0.39	0.52	0.35	0.48	0.42	0.49	0.56	0.52	0.71	0.38	0.33	0.64	0.56	0.39	0.65	0.63	0.49	0.34
chr1:225987738:225988005:-@chr1:225987279|225987351:225987205:-	A3SS	0.0391262	NA	NA	NA	0.38	0.47	NA	0.51	0.58	NA	0.68	0.61	0.3	NA	0.5	NA	0.4	0.61	NA	NA	0.41	NA	0.7	0.46	NA	NA	0.75	0.54	0.7	NA	0.67	NA	NA	NA
chr1:226351402:226351586:+@chr1:226351666:226351776:+	RI	0.0424284	0.3	0.26	0.29	0.29	0.32	0.44	0.38	0.47	0.43	0.44	0.31	0.41	0.15	0.66	0.4	0.4	0.47	0.69	0.49	0.49	0.32	0.31	0.33	0.36	0.21	0.35	0.47	0.32	0.24	0.26	0.45	0.25	0.26
chr1:226363279:226363345:-@chr1:226362761:226362798:-	RI	0.0469062	NA	NA	NA	NA	0.53	0.52	0.66	NA	NA	NA	0.46	0.6	NA	0.57	NA	0.51	NA	NA	NA	0.6	NA	0.42	NA	NA	NA	0.51	0.47	0.52	0.47	NA	NA	NA	NA
chr1:226660478:226661206:-@chr1:226656369:226656485:-@chr1:226651467:226651489:-@chr1:226647997:226651371:-	MXE	0.0244183	0.52	0.46	0.34	0.43	0.81	0.49	0.5	0.65	0.4	0.26	0.74	0.42	0.58	0.54	0.64	0.58	0.34	0.42	0.57	0.35	0.6	0.7	0.61	0.46	0.49	0.69	0.78	0.58	0.58	0.71	0.5	0.53	0.6
chr1:226668968:226670956:-@chr1:226668121:226668216:-@chr1:226665270:226665500:-	SE	0.0277588	NA	NA	NA	0.38	0.48	0.47	0.49	0.41	0.51	NA	0.63	0.56	0.42	0.48	NA	0.45	0.4	0.52	0.47	0.45	NA	0.47	0.45	NA	NA	0.37	0.43	0.4	0.33	0.44	NA	NA	0.43
chr1:231152927:231153113:+@chr1:231157926:231158088:+@chr1:231158716:231158816:+	SE	0.0481481	NA	0.65	0.74	0.8	0.85	0.81	0.74	NA	0.85	0.88	0.37	0.87	0.72	0.82	NA	0.84	0.83	NA	0.71	0.75	0.65	0.75	0.83	0.72	0.57	0.8	0.62	0.8	0.61	0.84	0.48	0.73	0.66
chr1:232596015:232596206:-@chr1:232595731:232595855:-@chr1:232594785:232594921:-	SE	0.0455003	NA	NA	NA	0.69	0.82	0.8	0.72	0.58	0.64	0.69	0.85	0.88	0.81	0.76	NA	0.58	0.46	NA	0.73	0.85	NA	0.59	0.7	NA	NA	0.56	0.64	0.71	0.63	0.69	0.7	0.53	0.66
chr1:23623645:23623855:-@chr1:23618157:23618219:-@chr1:23616984:23617089:-	SE	0.0201877	NA	0.48	0.74	0.69	0.67	0.7	0.83	0.76	0.85	0.88	0.84	0.77	0.7	0.91	0.8	0.5	0.83	0.59	0.86	0.76	0.78	0.67	0.61	0.6	0.64	0.75	0.8	0.6	0.47	0.74	0.58	0.31	0.73
chr1:23758097:23758013|23758009:-@chr1:23756993:23757493:-	A5SS	0.0134887	0.58	0.18	0.49	0.17	0.07	0.09	0.1	0.19	0.28	0.03	0.13	0.09	0.16	0.19	0.58	0.14	0.18	0.33	0.16	0.08	0.62	0.11	0.29	0.25	0.4	0.17	0.31	0.16	0.72	0.25	0.51	0.26	0.6
chr1:239749514:239749707:-@chr1:239747188|239747239:239747105:-	A3SS	0.0442889	0.74	0.75	0.76	0.85	0.93	0.93	0.92	0.81	0.57	0.8	0.97	0.59	0.73	0.78	0.84	0.94	0.81	NA	0.67	0.75	0.85	0.96	0.87	0.84	NA	0.92	0.9	0.93	0.83	0.88	0.78	0.85	0.85
chr1:241372388:241372292|241372211:-@chr1:241369862:241370032:-	A5SS	0.0369574	NA	NA	NA	0.71	0.67	0.7	0.71	NA	0.58	NA	0.66	0.65	0.57	0.69	NA	0.68	0.41	NA	NA	0.73	NA	0.57	0.39	0.61	NA	0.64	NA	0.69	0.66	0.36	NA	0.56	NA
chr1:241416184:241416423:-@chr1:241415704:241415997:-@chr1:241402622:241402771:-	SE	0.0017678	NA	NA	0.23	0.63	0.65	0.64	0.59	NA	0.58	0.6	0.68	0.46	0.66	0.72	0.41	0.52	0.57	NA	NA	0.45	0.69	0.68	0.69	0.77	0.69	0.72	NA	0.58	0.75	0.71	0.78	0.51	0.75
chr1:241537443:241538102:+@chr1:241546680|241546682:241546818:+	A3SS	0.0349585	0.66	0.52	0.63	0.45	0.73	0.59	0.59	0.59	NA	NA	0.75	0.45	0.44	0.47	0.47	0.72	NA	NA	0.35	0.72	0.61	0.82	0.74	0.5	0.49	0.76	0.52	0.74	0.8	0.77	0.47	0.72	0.71
chr1:242709642:242709709:+@chr1:242782247:242782739:+@chr1:242790593:242791492:+	SE	0.0137453	NA	NA	NA	0.5	0.61	0.49	0.45	NA	0.41	NA	0.6	NA	0.6	NA	0.66	0.7	0.38	NA	NA	0.55	NA	0.83	0.67	NA	NA	0.58	NA	0.75	NA	0.74	NA	0.63	NA
chr1:24320455:24320814:-@chr1:24318848:24320381:-	RI	0.017473	0.81	0.64	0.64	0.75	0.79	0.73	0.69	0.59	0.82	0.7	0.75	0.83	0.67	0.89	0.81	0.76	0.85	0.59	0.87	0.94	0.68	0.68	0.71	0.58	NA	0.88	0.59	0.71	0.44	0.67	0.47	0.51	0.78
chr1:244794271:244794359:-@chr1:244787306:244787459:-@chr1:244786498:244786646:-	SE	0.0224615	NA	NA	0.58	0.66	0.72	0.68	0.67	NA	NA	0.61	0.65	0.63	0.73	0.48	NA	0.61	0.57	0.54	NA	0.62	0.4	0.7	0.63	0.54	0.56	0.44	0.53	0.47	0.66	0.24	0.51	0.64	0.51
chr1:24613988:24614175:-@chr1:24612751:24612880:-@chr1:24599776:24600533:-	SE	0.0233246	NA	NA	NA	0.66	0.63	0.63	NA	NA	0.56	0.67	0.69	0.45	0.79	0.62	NA	0.4	NA	NA	NA	NA	0.49	0.61	0.53	NA	NA	NA	NA	0.54	0.52	0.34	NA	0.53	0.41
chr1:25551960:25552052:+@chr1:25555871:25555931:+@chr1:25559738:25561439:+	SE	0.0304738	0.83	0.76	0.91	0.86	0.88	0.87	0.88	0.75	0.93	0.95	0.91	0.92	0.78	0.94	0.91	0.9	0.9	0.75	0.93	0.93	0.67	0.84	0.87	0.74	0.71	0.85	0.88	0.88	0.91	0.84	0.88	0.87	0.87
chr1:25551960:25552052:+@chr1:25555871:25555935:+@chr1:25559738:25561439:+	SE	0.0201632	0.79	0.59	0.88	0.7	0.83	0.83	0.82	0.53	0.93	0.96	0.87	0.9	0.6	0.94	0.81	0.9	0.87	0.55	0.92	0.93	0.4	0.8	0.83	0.42	0.67	0.79	0.82	0.85	0.77	0.7	0.72	0.75	0.72
chr1:25559783:25560220:+@chr1:25560221:25561432:+	TandemUTR	0.0294896	0.49	0.82	0.76	0.37	0.9	0.9	0.9	0.73	0.94	0.86	0.93	0.91	0.5	0.92	0.73	0.9	0.82	0.64	0.74	0.88	0.64	0.93	0.88	0.5	0.57	0.89	0.71	0.84	0.47	0.37	0.54	0.31	0.48
chr1:26021608:26022206:+@chr1:26022316:26022517:+@chr1:26022722:26022826:+	SE	0.0445974	NA	0.64	0.56	0.48	0.48	0.49	0.67	0.68	NA	0.71	0.84	0.38	0.46	0.79	NA	0.34	0.49	NA	0.38	0.56	NA	0.29	0.76	NA	NA	0.36	0.46	0.31	0.49	0.28	NA	NA	NA
chr1:26645394:26645510:+@chr1:26646637:26646738:+@chr1:26656869:26656983:+	SE	0.0310214	NA	NA	0.59	0.68	0.77	0.73	0.61	NA	0.61	0.55	0.79	0.6	0.63	0.57	NA	0.67	0.36	NA	0.52	0.59	0.42	0.58	0.65	NA	0.52	0.42	0.5	0.61	NA	0.39	0.7	0.16	0.39
chr1:27088764:27090304:-@chr1:27088203|27088233:27088047:-	A3SS	0.0403534	NA	0.55	0.56	0.64	0.42	0.64	0.49	0.64	0.6	0.6	0.58	0.82	0.27	0.92	0.52	0.51	0.67	0.29	0.66	0.65	0.42	0.36	0.63	0.16	NA	0.5	0.55	0.61	0.36	0.35	0.65	0.51	0.43
chr1:27533229:27533359:+@chr1:27533745:27533832:+@chr1:27534457:27535478:+	SE	0.0388413	0.32	0.42	0.23	0.45	0.36	0.61	0.57	0.39	0.18	0.82	0.55	0.53	0.66	0.68	0.44	0.58	0.27	0.47	0.72	0.63	0.6	0.47	0.71	0.57	NA	0.71	0.88	0.65	0.57	0.47	0.47	0.79	0.62
chr1:27533229:27533359|27533350:+@chr1:27534457:27535478:+	A5SS	0.016482	0.6	0.6	0.54	0.54	0.71	0.77	0.71	0.69	0.84	0.65	0.85	0.55	0.54	0.73	0.52	0.67	0.78	0.48	0.58	0.63	0.54	0.83	0.52	0.46	NA	0.35	0.33	0.8	0.48	0.65	0.41	0.48	0.55
chr1:27549050:27549563:+@chr1:27549872|27550336:27550414:+	A3SS	0.0354355	NA	NA	NA	0.53	0.43	0.35	0.48	0.58	0.52	NA	0.65	NA	0.46	0.52	NA	NA	0.48	NA	NA	NA	NA	0.7	0.54	NA	NA	0.47	0.66	0.58	0.68	0.53	NA	NA	NA
chr1:28409669:28409735:-@chr1:28409070:28409164:-@chr1:28407440:28407511:-	SE	0.0398139	NA	0.42	0.53	0.53	0.46	0.68	0.5	NA	0.68	0.57	0.45	0.54	0.57	NA	0.52	0.45	0.45	NA	NA	0.4	0.4	0.54	0.43	0.43	0.45	0.46	NA	0.56	0.39	0.56	0.42	0.37	0.37
chr1:28759732:28759831:+@chr1:28760212:28760359:+@chr1:28760445:28760497:+	SE	0.0436426	NA	NA	NA	NA	0.54	0.53	NA	NA	0.58	NA	0.46	NA	NA	NA	NA	0.66	NA	NA	NA	NA	NA	0.52	0.48	NA	NA	0.42	NA	0.46	0.44	0.52	NA	NA	NA
chr1:30963528:30964999:+@chr1:30966411:30966608:+@chr1:30966722:30967156:+	SE	0.0230071	NA	NA	NA	NA	0.47	NA	0.56	NA	NA	NA	0.56	NA	NA	NA	NA	0.59	NA	NA	NA	NA	NA	0.4	0.47	NA	NA	0.33	0.47	0.44	0.39	NA	NA	NA	NA
chr1:31774457:31774597:+@chr1:31778996:31779073:+@chr1:31789723:31789845:+@chr1:31821337:31822989:+	MXE	0.00130523	0.48	0.49	0.39	0.39	0.36	0.48	0.46	0.36	0.47	0.42	0.32	0.47	0.39	0.37	0.36	0.3	0.45	0.49	0.47	0.43	0.49	0.37	0.38	0.52	0.52	0.5	0.63	0.49	0.62	0.49	0.55	0.54	0.4
chr1:32442067:32442233:+@chr1:32442374:32442567:+@chr1:32442786:32443575:+	SE	0.00595275	NA	NA	NA	0.45	0.53	0.65	0.72	0.64	NA	NA	0.6	0.47	0.49	0.64	NA	0.38	0.4	NA	0.5	NA	NA	0.91	0.75	NA	NA	0.63	0.6	0.81	0.74	0.72	NA	NA	NA
chr1:32624967:32625083:-@chr1:32622018:32622094:-@chr1:32617986:32619456:-	SE	0.0436025	0.57	0.63	0.48	0.59	0.57	0.79	0.71	NA	0.3	0.76	0.61	0.58	0.67	0.73	NA	0.8	0.41	0.41	0.57	0.61	NA	0.87	0.77	0.61	NA	0.64	NA	0.82	0.77	0.62	0.63	0.63	0.59
chr1:33055707:33055877:+@chr1:33058735:33058787:+@chr1:33063501:33063673:+	SE	0.0238095	NA	NA	NA	NA	NA	0.52	0.58	NA	NA	0.26	0.61	NA	NA	NA	NA	0.66	NA	NA	0.62	NA	NA	0.67	0.68	NA	NA	0.7	NA	NA	NA	NA	NA	NA	NA
chr1:33134098:33134157:-@chr1:33133743:33133931:-	RI	0.0421754	0.42	0.06	0.34	0.04	0.02	0.02	0.02	0.17	0.08	0.03	0.02	0.02	0.02	0.01	0.06	0.03	0.01	NA	0.03	0.04	0.15	0.04	0.03	0.07	0.08	0.02	0.04	0.03	0.31	0.06	0.63	0.15	0.09
chr1:33176585:33176716:-@chr1:33175447|33175497:33174642:-	A3SS	0.0164462	0.38	0.53	0.31	0.59	0.46	0.36	0.46	0.58	0.52	0.5	0.44	0.56	0.42	0.55	0.23	0.56	0.46	0.51	0.45	0.57	0.35	0.56	0.69	0.26	0.8	0.62	0.59	0.5	0.58	0.59	0.78	0.61	0.46
chr1:33259649:33259579|33259555:-@chr1:33252088:33252782:-	A5SS	0.0377869	0.49	0.49	0.46	0.54	0.36	0.61	0.53	NA	0.51	0.52	0.66	0.54	0.45	NA	NA	0.43	0.6	0.57	0.42	0.64	NA	0.69	0.57	0.52	0.61	0.68	NA	0.68	0.71	NA	NA	0.55	0.35
chr1:3553984:3553832|3553830:-@chr1:3553090:3553206:-	A5SS	0.0396348	NA	NA	NA	NA	0.54	NA	0.73	NA	NA	0.45	0.63	0.54	NA	0.59	NA	0.52	NA	NA	NA	NA	NA	0.44	0.38	NA	NA	NA	NA	0.46	NA	NA	NA	NA	NA
chr1:36559244:36559397:+@chr1:36559912:36559966:+	RI	0.019451	NA	NA	NA	NA	0.57	0.74	NA	0.64	NA	NA	0.57	NA	NA	0.55	NA	NA	NA	NA	NA	NA	NA	0.4	0.53	NA	NA	0.51	NA	0.5	NA	NA	NA	NA	NA
chr1:37973516:37973649:-@chr1:37972839:37972946:-@chr1:37969670:37969841:-	SE	0.0139259	NA	NA	NA	0.2	0.38	0.2	0.34	NA	0.19	0.13	0.26	0.23	0.26	0.6	NA	0.28	0.29	NA	0.1	0.24	NA	0.31	NA	NA	NA	0.47	0.73	0.46	NA	0.34	0.66	0.22	0.33
chr1:39800582:39802801:-@chr1:39800459|39800462:39800332:-	A3SS	0.0307259	0.6	0.51	0.61	0.74	0.8	0.61	0.62	0.61	0.45	0.47	0.8	0.55	0.62	0.71	0.6	0.61	0.62	0.46	0.6	0.67	0.4	0.47	0.53	0.62	0.48	0.73	0.58	0.79	0.48	0.51	0.41	0.46	0.43
chr1:39803032:39802945|39802941:-@chr1:39800582:39802801:-	A5SS	0.0209265	0.44	0.51	0.51	0.46	0.37	0.38	0.49	0.53	0.59	0.5	0.79	0.49	0.53	0.51	0.52	0.64	0.42	0.57	0.38	0.54	0.56	0.5	0.56	0.53	0.56	0.56	0.52	0.66	0.64	0.56	0.55	0.46	0.7
chr1:39982083:39982183:+@chr1:39983634:39983757:+@chr1:39987162:39987347:+	SE	0.0325935	NA	0.55	0.78	0.6	0.56	0.68	0.79	NA	0.68	0.57	0.9	0.87	0.55	0.65	0.65	0.87	0.67	NA	0.59	0.61	0.42	0.61	0.74	0.5	0.5	0.7	0.44	0.53	0.6	0.53	0.68	0.21	0.71
chr1:40086245:40086566:-@chr1:40085919|40086006:40085807:-	A3SS	0.041637	NA	NA	NA	0.48	0.59	NA	0.62	NA	NA	NA	0.8	0.74	NA	NA	NA	NA	0.78	NA	0.56	NA	NA	0.81	0.8	NA	NA	0.82	NA	0.82	0.6	NA	NA	NA	NA
chr1:40205337:40205428:+@chr1:40205887:40206175:+@chr1:40206593:40206740:+	SE	0.0368065	0.67	0.72	0.59	0.61	0.61	0.63	0.49	0.66	0.55	0.58	0.45	0.53	0.38	0.72	0.57	0.54	0.55	0.58	0.73	0.7	NA	0.23	0.54	NA	NA	0.55	NA	0.57	0.44	0.62	0.51	NA	0.53
chr1:41284677:41284928:-@chr1:41279570:41279824:-@chr1:41275621:41275800:-	SE	0.00373938	NA	NA	NA	0.34	0.06	0.2	0.14	NA	0.11	0.07	0.1	0.41	NA	0.11	NA	0.15	0.06	NA	0.25	0.07	0.3	0.13	0.29	0.49	0.44	0.31	NA	0.33	0.5	NA	0.16	0.4	0.29
chr1:41284857:41284677|41284666:-@chr1:41275621:41275800:-	A5SS	0.0161311	NA	NA	NA	0.78	0.81	0.47	0.6	NA	0.79	0.72	0.79	0.75	NA	0.5	NA	0.87	0.88	NA	0.56	0.89	0.53	0.68	0.38	0.61	0.45	0.78	NA	0.69	0.61	NA	0.66	0.37	0.48
chr1:41351542:41351812:-@chr1:41344001:41344084:-@chr1:41313478:41313710:-	SE	0.0175659	NA	0.35	0.61	0.39	0.38	0.5	0.4	0.86	0.49	0.58	0.33	0.49	0.74	0.37	0.39	0.33	0.69	0.81	0.82	0.66	0.26	0.28	0.38	0.29	0.29	0.48	0.77	0.35	0.33	0.41	NA	0.27	0.72
chr1:43013652:43013785:+@chr1:43013786:43013997:+	TandemUTR	0.00606061	NA	NA	NA	0.54	NA	0.57	0.51	NA	NA	0.32	0.55	NA	NA	NA	NA	0.42	0.46	NA	NA	NA	NA	0.6	NA	NA	NA	0.62	NA	0.59	NA	0.69	NA	NA	NA
chr1:43603444:43603634:-@chr1:43603186:43603355:-	RI	0.0456125	NA	NA	0.31	0.18	0.14	0.26	0.13	0.23	0.05	0.06	0.09	0.03	0.19	0.04	NA	0.08	0.19	NA	0.12	0.09	0.38	0.18	0.35	0.45	NA	0.08	0.24	0.04	0.31	0.12	0.22	0.19	0.21
chr1:43603444:43603634:-@chr1:43603186:43603355:-@chr1:43602582:43603052:-	SE	0.0320775	0.59	0.7	0.65	0.84	0.93	0.81	0.77	0.81	0.93	0.83	0.89	0.94	0.86	0.7	NA	0.92	0.9	NA	0.92	0.9	0.76	0.76	0.63	0.66	0.72	0.87	0.8	0.87	0.82	0.67	0.8	0.79	0.75
chr1:44486297:44486198|44486194:-@chr1:44459329:44459899:-	A5SS	0.028127	0.31	0.5	0.41	0.5	0.48	0.54	0.37	0.57	0.5	0.42	0.52	0.37	0.42	0.14	0.6	0.14	0.38	0.44	0.18	0.34	0.52	0.49	0.56	0.54	0.48	0.44	0.42	0.64	0.57	0.45	0.47	0.54	0.43
chr1:45014934:45015037|45015033:+@chr1:45015873:45016048:+	A5SS	0.023342	0.7	0.44	0.47	0.32	0.51	0.52	0.59	0.78	0.65	0.63	0.61	0.73	0.62	0.6	0.58	0.64	0.64	0.45	0.87	0.72	0.51	0.61	0.56	0.48	0.45	0.48	0.66	0.6	0.56	0.33	0.28	0.56	0.42
chr1:45216574:45216719:-@chr1:45208237:45208303:-@chr1:45179765:45179924:-	SE	0.0427412	NA	NA	0.28	0.65	0.42	0.31	0.17	0.56	0.24	0.45	0.43	NA	NA	0.52	NA	0.28	0.33	0.58	0.7	0.61	NA	0.32	0.63	0.76	0.67	0.14	0.68	0.6	0.56	0.61	0.6	0.66	0.53
chr1:45250461:45251278:+@chr1:45251395|45251475:45251613:+	A3SS	0.042802	NA	0.4	0.71	0.74	0.88	0.89	0.81	0.78	0.84	0.72	0.76	0.66	0.81	0.76	NA	0.91	0.75	NA	0.76	0.42	0.7	0.76	0.62	NA	NA	0.72	0.57	0.71	0.65	0.63	NA	NA	0.79
chr1:45572650:45572770:-@chr1:45571823|45571862:45571672:-	A3SS	0.042624	NA	NA	NA	0.65	0.7	0.71	0.75	NA	0.6	NA	0.66	NA	NA	NA	NA	NA	NA	NA	0.78	0.72	NA	0.62	0.74	NA	NA	0.47	0.61	0.58	0.34	NA	NA	NA	NA
chr1:45580643:45580902:+@chr1:45580994|45581102:45581261:+	A3SS	0.0302813	NA	NA	NA	0.43	0.38	0.4	0.32	NA	NA	NA	0.17	0.27	NA	NA	NA	0.26	0.58	NA	NA	0.38	NA	0.53	0.54	0.46	NA	0.44	NA	0.47	0.77	0.68	NA	0.25	NA
chr1:45734815:45734882:-@chr1:45733677:45733732:-@chr1:45732127:45733425:-	SE	0.0357143	NA	NA	NA	0.39	0.38	0.36	NA	NA	NA	NA	0.34	NA	0.45	NA	NA	NA	NA	NA	NA	NA	NA	0.49	NA	NA	NA	0.65	NA	0.63	NA	NA	NA	NA	NA
chr1:45788802:45789414:+@chr1:45790695:45790822:+@chr1:45800048:45800137:+	SE	0.0156879	0.8	0.92	0.9	0.8	0.85	0.93	0.76	0.69	0.94	0.85	0.8	0.88	0.7	0.88	0.72	0.75	0.83	0.66	0.59	0.82	0.66	0.74	0.77	0.85	0.68	0.74	0.82	0.71	0.76	0.72	0.58	0.54	0.73
chr1:46422450:46422656:+@chr1:46422853:46422927:+@chr1:46423044:46423374:+	SE	0.0323562	0.79	0.61	0.83	0.72	0.82	0.84	0.86	0.91	0.87	0.92	0.86	0.95	0.68	0.95	0.92	0.87	0.92	0.51	0.94	0.94	0.67	0.81	0.86	0.75	0.68	0.88	0.91	0.82	0.75	0.7	0.7	0.77	0.81
chr1:46422450:46422927|46422656:+@chr1:46423044:46423374:+	A5SS	0.0269464	0.26	0.15	0.58	0.3	0.35	0.42	0.4	0.68	0.4	0.53	0.39	0.49	0.25	0.68	0.41	0.44	0.53	0.48	0.58	0.55	0.3	0.39	0.42	0.22	0.34	0.41	0.47	0.36	0.46	0.24	0.26	0.32	0.29
chr1:47507894:47508125:-@chr1:47501321|47501372:47501162:-	A3SS	0.0494662	NA	NA	0.67	0.83	0.83	0.71	0.49	NA	0.79	0.55	0.72	0.8	0.85	NA	NA	0.64	0.76	NA	0.69	0.83	NA	0.3	0.54	NA	NA	0.87	0.68	0.58	0.61	0.61	0.6	0.64	0.72
chr1:52003800:52004241:+@chr1:52010330:52010442:+@chr1:52010865:52010983:+	SE	0.0361902	0.71	0.87	0.8	0.85	0.95	0.93	0.9	NA	0.88	0.95	0.92	0.91	0.83	0.93	0.52	0.95	0.79	0.84	0.9	0.89	0.78	0.86	0.95	0.88	0.67	0.87	0.54	0.79	0.86	0.68	0.72	0.81	0.87
chr1:52846685:52847164:+@chr1:52847165:52847311:+	TandemUTR	0.0048436	NA	NA	NA	0.52	0.56	NA	0.43	NA	NA	0.44	0.45	NA	0.49	NA	NA	0.63	NA	NA	NA	NA	NA	0.79	0.73	NA	NA	0.63	NA	0.56	0.7	0.69	NA	NA	0.67
chr1:53146128:53146214:-@chr1:53143350|53144871:53143294:-	A3SS	0.0283297	0.67	0.51	0.72	0.57	0.48	0.54	0.59	NA	0.61	0.5	0.53	0.51	0.56	0.5	0.5	0.49	0.44	0.51	0.62	0.48	0.41	0.6	0.49	0.44	0.49	0.41	0.54	0.39	0.64	0.43	0.5	0.51	0.46
chr1:54291261:54291727:-@chr1:54283953:54284047:-@chr1:54281634:54281786:-	SE	0.0254891	0.68	0.8	0.81	0.87	0.85	0.86	0.83	0.73	0.91	0.96	0.82	0.87	0.75	0.94	0.78	0.86	0.83	0.78	0.89	0.87	0.84	0.77	0.83	0.58	0.74	0.86	0.8	0.8	0.87	0.69	0.73	0.77	0.74
chr1:6182209:6182283:-@chr1:6180299:6180397:-@chr1:6175577:6175701:-	SE	0.00805222	NA	0.52	0.52	0.56	0.65	0.53	0.65	0.65	0.58	0.6	0.67	0.57	0.65	0.62	0.51	0.53	0.73	NA	0.53	0.6	0.3	0.7	0.64	0.51	0.45	0.53	0.43	0.6	0.51	0.49	0.54	0.5	0.44
chr1:63692177:63692233:-@chr1:63685065:63685115:-@chr1:63678624:63679362:-	SE	0.0421464	NA	0.65	0.7	0.65	0.68	0.84	0.75	NA	0.5	0.76	0.89	0.71	0.64	0.44	0.69	0.79	0.87	NA	0.79	0.8	0.62	0.76	0.55	0.54	0.5	0.69	0.57	0.8	0.51	0.8	0.53	0.61	0.55
chr1:6446952:6447100:-@chr1:6445510:6445603:-	RI	0.0110854	0.53	0.49	0.49	0.66	0.47	0.55	0.26	0.08	0.47	0.61	0.31	0.49	0.53	0.49	0.53	0.56	0.31	0.43	NA	0.07	NA	0.61	0.21	0.51	NA	0.65	0.68	0.66	0.58	0.56	NA	0.57	NA
chr1:67100418:67100573:-@chr1:67085755:67085949:-@chr1:67078740:67078942:-	SE	0.031402	NA	NA	NA	0.6	0.58	0.83	0.8	NA	0.84	0.75	0.74	NA	0.67	NA	NA	0.78	0.63	NA	0.8	NA	0.33	0.78	NA	0.49	0.22	0.74	0.6	0.57	NA	0.67	NA	0.71	0.71
chr1:67662548:67662471|67662467:-@chr1:67657055:67658457:-	A5SS	0.0463457	0.59	0.7	0.82	0.92	0.93	0.88	0.93	0.52	0.86	0.88	0.45	0.87	0.88	0.89	0.79	0.93	0.6	0.77	0.9	0.47	0.56	0.5	0.55	0.48	0.53	0.55	0.53	0.94	0.88	0.4	0.83	0.84	0.73
chr1:71642009:71645715:-@chr1:71641212:71642008:-	TandemUTR	0.0425322	0.33	0.21	0.37	0.15	0.12	0.12	0.12	0.61	0.34	0.49	0.24	0.57	0.23	0.15	0.33	0.18	0.45	0.64	0.56	0.16	0.07	0.1	0.18	0.29	0.06	0.31	0.46	0.14	0.11	0.17	0.15	0.31	0.26
chr1:75002385:75002672:+@chr1:75002673:75004946:+	TandemUTR	0.0380756	0.55	0.5	0.43	0.61	0.49	0.25	0.18	NA	0.55	0.66	0.32	0.37	0.49	0.53	0.56	0.22	0.25	0.67	0.45	0.49	0.59	0.34	0.7	0.66	0.57	0.64	0.59	0.41	0.66	0.63	0.48	0.62	0.4
chr1:76030454:76030579:+@chr1:76032357:76032506:+@chr1:76032783:76033362:+	SE	0.0418926	0.77	0.88	0.68	0.88	0.91	0.92	0.95	0.61	0.87	0.94	0.91	0.94	0.87	0.88	0.79	0.91	0.93	0.44	0.91	0.85	0.8	0.91	0.85	0.77	0.4	0.83	0.75	0.87	0.9	0.68	0.74	0.74	0.91
chr1:7768088:7768233:+@chr1:7769368:7769483:+@chr1:7769845:7769893:+@chr1:7770692:7770899:+	MXE	0.0394263	0.6	NA	0.74	0.84	0.68	0.73	0.78	NA	0.57	0.78	0.85	0.89	NA	0.89	0.75	0.94	0.84	0.74	NA	0.84	0.7	0.74	0.72	NA	NA	0.71	NA	0.76	0.85	0.65	0.67	0.58	0.65
chr1:7768088:7768233:+@chr1:7769368:7769483:+@chr1:7770692:7770899:+	SE	0.0051705	0.69	NA	0.61	0.89	0.53	0.72	0.7	NA	0.47	0.68	0.72	0.83	NA	0.88	0.7	0.81	0.82	0.67	NA	0.87	0.66	0.65	0.65	NA	NA	0.62	NA	0.59	0.67	0.68	0.5	0.47	0.64
chr1:78867908:78868188:+@chr1:78873610|78873615:78873762:+	A3SS	0.0190476	NA	NA	NA	NA	0.67	NA	0.56	NA	0.73	NA	0.78	0.64	NA	NA	NA	0.72	NA	NA	NA	NA	NA	0.39	0.62	NA	NA	0.52	NA	NA	0.42	NA	NA	NA	NA
chr1:7947971:7948072:+@chr1:7951732:7951795:+@chr1:7951992:7952051:+	SE	0.042683	0.54	0.52	0.43	0.47	0.56	0.5	0.62	0.44	NA	0.59	0.56	0.51	0.52	NA	NA	NA	NA	NA	NA	0.52	NA	0.37	0.51	0.5	NA	NA	NA	0.41	0.59	0.42	NA	0.36	NA
chr1:7947971:7948072:+@chr1:7951992:7952051:+@chr1:7953541:7954602:+	SE	0.038254	0.52	NA	NA	0.73	0.84	0.76	0.85	0.67	0.81	0.87	0.93	0.84	0.75	0.72	NA	0.86	0.77	0.51	0.92	0.71	0.73	0.94	0.78	0.59	0.54	0.68	0.4	0.89	0.34	0.7	0.47	0.62	0.61
chr1:84237202:84237426:-@chr1:84171879:84172037:-@chr1:84167407:84167501:-	SE	0.0223589	NA	0.68	0.59	0.62	0.59	NA	0.59	NA	NA	NA	0.58	NA	NA	0.55	NA	0.75	0.74	NA	NA	NA	NA	0.5	0.57	0.54	NA	0.58	NA	0.69	0.53	NA	NA	0.45	NA
chr1:84316305:84316642:+@chr1:84411600:84411623:+@chr1:84413304:84413327:+	SE	0.029401	NA	NA	NA	NA	0.33	NA	0.38	NA	NA	NA	0.43	NA	NA	NA	NA	0.47	NA	NA	NA	NA	NA	0.53	NA	NA	0.5	NA	NA	0.62	NA	NA	NA	NA	0.5
chr1:85816255:85816634:-@chr1:85815763:85815846:-@chr1:85734437:85734552:-	SE	0.048951	NA	NA	NA	0.45	0.35	0.3	0.57	NA	0.46	NA	0.41	0.61	0.37	0.24	NA	0.52	NA	NA	NA	NA	NA	0.75	NA	NA	NA	NA	NA	0.58	0.56	NA	NA	NA	NA
chr1:876370:876481:-@chr1:873837|873846:873733:-	A3SS	0.0444444	NA	NA	NA	0.61	0.48	NA	0.53	NA	NA	0.62	0.69	0.56	NA	NA	NA	0.58	NA	NA	NA	0.57	NA	0.72	NA	NA	NA	NA	0.8	NA	NA	NA	NA	NA	NA
chr1:89258803:89259014:-@chr1:89258397:89258482:-@chr1:89253558:89253685:-	SE	0.0276163	0.39	0.59	0.58	0.38	0.32	0.48	0.41	0.67	0.51	0.78	0.36	0.41	0.52	0.57	0.4	0.57	0.54	0.44	0.63	0.54	0.34	0.33	0.53	0.42	NA	0.37	0.25	0.38	0.38	0.41	0.53	0.41	0.55
chr1:89260955:89261164:-@chr1:89258624:89259014:-@chr1:89253558:89253685:-	SE	0.0407935	0.42	0.57	0.87	0.71	0.69	0.73	0.84	0.66	0.94	0.79	0.77	0.82	0.63	0.93	0.75	0.65	0.85	0.57	0.91	0.92	0.62	0.62	0.85	0.56	0.66	0.84	NA	0.85	0.64	0.46	0.47	0.62	0.58
chr1:89260955:89261164:-@chr1:89258803:89259014:-@chr1:89253558:89253685:-	SE	0.0254398	0.67	0.71	0.92	0.84	0.85	0.83	0.93	0.83	0.97	0.84	0.89	0.92	0.78	0.95	0.8	0.77	0.93	0.68	0.92	0.97	0.78	0.78	0.93	0.73	0.7	0.9	0.71	0.92	0.82	0.62	0.62	0.78	0.67
chr1:89298595:89298468|89298442:-@chr1:89297162:89297697:-	A5SS	0.0275097	0.79	NA	0.72	0.86	0.9	0.67	0.8	0.68	0.79	0.89	0.92	0.9	0.62	0.92	0.85	0.74	0.89	0.62	NA	0.94	0.37	0.76	0.91	0.74	0.73	0.7	0.7	0.68	0.69	0.56	0.74	0.58	0.82
chr1:92974543:92974772:-@chr1:92963743:92963840:-@chr1:92942700:92942889:-	SE	0.00442356	0.52	0.42	0.21	0.26	0.32	0.29	0.37	0.55	0.21	0.26	0.32	0.41	0.37	0.36	0.26	0.26	0.28	0.31	0.46	0.62	0.31	0.56	0.27	0.21	0.31	0.17	0.29	0.21	0.16	0.21	0.2	0.17	0.2
chr10:102255787:102255948:-@chr10:102255108:102255242:-	RI	0.0434471	NA	NA	NA	0.67	0.65	0.72	0.75	NA	0.76	NA	0.76	NA	0.7	0.5	NA	0.59	0.76	NA	0.71	NA	NA	0.71	0.63	NA	NA	0.7	0.6	0.65	0.57	0.66	NA	0.56	0.56
chr10:102736496:102736722:-@chr10:102733564|102733821:102733502:-	A3SS	0.0153551	0.59	0.5	0.59	0.4	0.36	0.46	0.56	0.72	0.23	NA	0.63	0.18	0.61	0.11	0.51	0.25	0.19	0.52	NA	0.1	0.55	0.15	0.65	0.53	0.61	0.73	0.8	0.67	0.53	0.53	0.65	0.63	0.49
chr10:102736722:102736496|102736434:-@chr10:102736016:102736319:-	A5SS	0.0234231	0.43	0.43	0.23	0.44	0.77	0.82	0.89	0.53	0.83	0.81	0.91	0.86	0.52	0.94	0.78	0.84	0.73	0.68	0.9	0.63	0.49	0.55	0.84	0.27	0.61	0.79	0.66	0.63	0.41	0.29	0.39	0.28	0.72
chr10:102810646:102811862:+@chr10:102812289|102812733:102812850:+	A3SS	0.0479395	NA	0.37	0.49	0.52	0.64	0.71	0.69	0.63	0.38	0.51	0.59	0.36	NA	0.46	NA	0.77	0.57	0.47	NA	0.64	NA	0.82	0.64	NA	NA	0.85	0.75	0.64	0.52	0.52	NA	NA	NA
chr10:1032046:1032182:+@chr10:1033148:1033248:+	RI	0.0231716	NA	NA	NA	0.53	0.57	0.59	0.35	NA	0.63	0.57	0.05	0.52	0.28	0.56	NA	0.55	0.67	NA	0.58	0.47	NA	0.17	0.21	0.33	NA	0.28	NA	0.23	0.57	0.54	NA	0.07	0.49
chr10:103887252:103887785:+@chr10:103888366:103888512:+@chr10:103888626:103888727:+	SE	0.0298726	NA	NA	NA	0.76	0.9	0.67	0.79	NA	NA	0.89	0.94	0.85	NA	0.82	NA	0.83	0.75	NA	0.72	0.89	NA	0.63	0.74	NA	NA	0.89	0.67	0.88	0.62	0.66	NA	0.72	0.73
chr10:104464266:104464428:+@chr10:104464970:104465075:+@chr10:104466336:104466458:+@chr10:104476359:104476544:+	MXE	0.0416034	NA	NA	NA	NA	0.41	0.46	0.42	NA	NA	NA	0.52	0.43	NA	NA	NA	0.42	0.3	NA	0.82	0.33	NA	0.32	NA	NA	NA	0.31	NA	0.28	NA	NA	NA	NA	NA
chr10:105191573:105191722:+@chr10:105191957|105191960:105192207:+	A3SS	0.0370482	NA	NA	NA	0.53	0.36	0.65	0.3	0.56	0.5	0.26	0.3	0.3	0.34	0.44	NA	0.27	0.24	NA	NA	0.44	NA	0.76	0.54	NA	NA	0.74	0.61	0.39	0.42	0.54	NA	0.31	NA
chr10:106009324:106009546:+@chr10:106012727:106012825:+@chr10:106015832:106015938:+	SE	0.00664004	0.79	0.53	0.87	0.88	0.77	0.83	0.82	0.75	0.85	0.9	0.81	0.89	0.64	0.84	0.81	0.83	0.94	0.82	0.82	0.82	0.65	0.69	0.79	0.63	0.77	0.76	0.75	0.8	0.79	0.73	0.68	0.86	0.82
chr10:1113847:1113943:+@chr10:1115496:1115617:+@chr10:1115951:1116690:+	SE	0.00769355	NA	NA	0.67	0.36	0.51	0.75	0.72	0.43	0.63	NA	0.87	0.41	0.61	0.63	NA	0.72	0.58	0.39	0.71	0.55	NA	0.72	0.79	0.76	NA	0.75	NA	0.7	0.71	0.69	0.68	0.79	0.74
chr10:1132110:1132186:+@chr10:1141066:1141207:+@chr10:1160158:1160292:+	SE	0.00593265	NA	NA	NA	NA	0.57	0.57	0.44	NA	0.54	0.58	0.48	0.54	NA	0.45	NA	0.52	0.59	NA	NA	0.57	0.62	NA	0.58	0.59	NA	0.59	0.59	NA	NA	NA	NA	NA	NA
chr10:114789774:114789875:+@chr10:114839149:114839289:+@chr10:114890933:114891090:+	SE	0.0356911	NA	0.54	0.62	0.39	NA	0.61	0.53	0.42	0.68	0.78	0.66	0.44	NA	0.58	NA	0.6	0.56	0.51	0.75	0.56	0.57	NA	0.34	0.59	NA	0.53	0.56	0.53	0.5	0.3	0.19	0.51	0.54
chr10:116034612:116034723|116034719:+@chr10:116035688:116036260:+	A5SS	0.0333333	NA	NA	NA	NA	0.4	0.48	0.64	0.46	NA	NA	0.22	NA	NA	NA	NA	NA	0.43	NA	NA	0.51	NA	0.69	0.6	NA	NA	NA	0.66	NA	NA	NA	NA	NA	NA
chr10:120867020:120867169:+@chr10:120869843:120869954:+@chr10:120872971:120873071:+	SE	0.0312548	NA	0.61	NA	0.51	0.62	0.79	0.74	0.53	0.75	0.79	0.79	0.7	0.45	0.73	NA	0.34	0.66	NA	0.8	0.44	0.6	0.43	0.66	NA	NA	0.6	NA	0.4	0.48	0.67	NA	0.28	0.49
chr10:120895855:120895738|120895734:-@chr10:120890405:120890821:-	A5SS	0.0437746	0.59	0.46	0.45	0.57	0.3	0.25	0.27	0.49	0.47	0.19	0.28	0.29	0.27	0.49	0.44	0.37	0.19	NA	0.19	0.31	0.55	0.42	0.48	0.46	0.56	0.24	0.39	0.69	0.48	0.66	0.34	0.44	0.47
chr10:12183047:12183186:+@chr10:12188251:12188401:+@chr10:12189914:12190020:+	SE	0.012487	NA	NA	NA	0.48	0.81	0.79	0.64	0.57	0.78	0.77	0.71	0.77	0.73	0.65	NA	0.67	0.64	NA	0.74	0.74	0.58	0.55	0.57	NA	NA	0.82	0.53	0.68	0.32	0.42	NA	0.49	0.6
chr10:124375439:124375471:+@chr10:124379346:124379499:+@chr10:124379794:124380238:+	SE	0.00606365	0.99	0.97	0.98	0.99	0.99	0.99	0.96	0.94	0.99	0.83	1	1	0.98	0.98	0.97	0.89	0.94	0.65	0.79	0.99	0.83	0.69	0.99	0.63	NA	0.87	0.79	0.93	0.94	0.91	NA	0.89	0.91
chr10:124912118:124912334:+@chr10:124913326|124914553:124914871:+	A3SS	0.00316536	0.46	0.47	0.49	0.7	0.48	0.52	0.49	0.47	0.5	0.38	0.45	0.35	0.51	0.54	0.6	0.47	0.3	0.59	0.62	0.46	0.67	0.48	0.55	0.59	0.5	0.48	0.54	0.55	0.66	0.61	0.77	0.69	0.77
chr10:124912118:124912334:+@chr10:124914553:124914871:+	RI	0.016383	0.33	0.35	0.31	0.48	0.3	0.36	0.33	0.28	0.38	0.22	0.29	0.21	0.36	0.38	0.49	0.33	0.21	0.48	0.48	0.29	0.52	0.29	0.37	0.38	0.34	0.33	0.46	0.4	0.47	0.36	0.64	0.57	0.5
chr10:126667713:126668075:-@chr10:126666887:126667712:-	TandemUTR	0.0324867	0.68	0.79	0.74	0.82	0.68	0.78	0.57	0.59	0.59	0.42	0.6	0.64	0.72	0.77	0.56	0.69	0.47	0.72	0.73	0.82	0.77	0.57	0.51	0.65	0.78	0.41	0.2	0.58	0.66	0.7	0.43	0.33	0.51
chr10:126838878:126839131:-@chr10:126812071:126812171:-@chr10:126789524:126789652:-	SE	0.0221055	0.55	NA	0.64	0.6	0.58	0.48	0.44	0.74	0.67	0.66	0.53	0.71	0.53	0.62	0.2	0.67	0.69	NA	0.7	0.84	0.64	0.44	0.54	0.48	0.57	0.5	0.37	0.54	NA	0.49	0.54	0.5	0.63
chr10:127398074:127398474:+@chr10:127399763|127399842:127399971:+	A3SS	0.0424728	NA	NA	NA	0.69	0.86	0.75	0.72	NA	NA	NA	0.78	NA	NA	NA	NA	0.86	0.75	NA	NA	0.8	NA	0.77	0.76	NA	NA	0.63	0.66	0.74	0.68	0.55	NA	NA	NA
chr10:127658720:127658897|127658884:+@chr10:127667110:127674057:+	A5SS	0.0453218	NA	0.58	NA	0.6	0.52	0.57	0.57	NA	0.6	0.51	0.56	0.31	0.66	0.56	NA	0.71	0.55	NA	0.43	NA	NA	0.37	0.47	0.55	0.55	0.36	0.61	0.54	0.53	0.54	NA	0.41	0.47
chr10:127667110:127667234:+@chr10:127673976:127674057:+	RI	0.00318319	NA	NA	NA	0.54	0.56	0.43	0.51	NA	0.45	0.47	0.37	0.48	0.53	0.49	NA	0.48	0.34	NA	0.43	NA	NA	0.55	0.6	NA	0.59	0.24	0.56	0.57	0.54	0.62	NA	0.65	0.55
chr10:13410357:13410456:-@chr10:13405047|13405053:13404841:-	A3SS	0.0449401	NA	NA	0.47	0.73	0.8	0.75	0.74	NA	0.84	0.87	0.91	0.42	0.56	0.77	NA	0.81	0.91	NA	0.7	0.84	0.66	0.8	0.82	0.4	0.72	0.76	0.24	0.86	0.58	0.66	0.4	0.38	0.61
chr10:135028219:135028152|135028148:-@chr10:135025948:135026427:-	A5SS	0.00667664	0.21	0.14	0.23	0.21	0.08	0.12	0.12	0.36	0.08	0.1	0.09	0.17	0.08	0.15	0.19	0.12	0.04	0.54	0.08	0.11	0.29	0.14	0.17	0.19	0.53	0.13	0.15	0.13	0.24	0.38	0.37	0.43	0.25
chr10:14910150:14910277:-@chr10:14907484:14907625:-@chr10:14901079:14902163:-	SE	0.042624	NA	NA	NA	0.58	0.47	0.61	0.6	NA	NA	NA	0.72	NA	0.42	0.39	NA	0.54	NA	NA	NA	NA	NA	0.74	0.63	NA	NA	0.78	NA	0.75	0.44	NA	NA	NA	0.69
chr10:16899320:16899541:-@chr10:16864039:16864089:-@chr10:16846395:16846515:-	SE	0.0481385	NA	0.69	NA	0.75	0.83	0.91	0.8	NA	0.78	NA	0.95	0.75	0.74	0.52	0.67	0.83	NA	NA	0.77	0.83	0.53	0.86	0.64	0.6	0.52	0.68	0.73	0.8	0.48	0.83	NA	NA	0.6
chr10:17770032:17770178:+@chr10:17772097:17772239:+@chr10:17775227:17775317:+	SE	0.00640789	NA	NA	0.36	0.68	0.24	0.42	0.58	NA	0.67	0.65	0.68	0.63	0.62	NA	0.56	0.36	0.35	0.55	NA	0.72	NA	0.19	0.49	0.33	NA	0.3	0.17	0.45	0.58	0.13	0.31	0.32	0.59
chr10:18914884:18915028:-@chr10:18910616:18910756:-@chr10:18880754:18880906:-	SE	0.0212057	0.54	NA	0.32	0.4	0.41	0.19	0.49	0.63	0.26	0.2	0.21	NA	0.24	0.41	0.57	0.35	0.57	0.38	0.22	NA	0.6	0.21	0.49	0.74	NA	0.23	0.63	0.67	0.43	0.66	0.67	0.31	0.65
chr10:21867768:21867847:+@chr10:21886556:21886759:+@chr10:21915229:21915283:+	SE	0.0437181	NA	0.47	0.46	0.68	0.43	0.5	0.37	NA	0.42	NA	0.48	NA	0.41	0.46	NA	0.56	NA	NA	0.51	NA	NA	0.65	0.51	NA	0.49	0.5	0.54	0.62	NA	NA	NA	NA	NA
chr10:27038573:27038703:+@chr10:27049070|27049153:27049294:+	A3SS	0.019237	0.64	0.61	0.51	0.35	0.7	0.78	0.76	0.55	0.83	0.7	0.66	0.86	0.54	0.63	0.38	0.69	0.63	NA	0.56	0.44	0.65	0.36	0.41	NA	NA	0.68	0.57	0.43	0.31	0.42	NA	0.44	0.53
chr10:27377736:27377914:-@chr10:27375455|27375458:27375288:-	A3SS	0.0487364	NA	NA	NA	0.74	0.73	0.59	0.49	NA	NA	NA	0.62	0.49	0.64	NA	NA	0.46	NA	NA	NA	NA	NA	0.44	0.47	NA	NA	0.46	NA	0.58	0.71	0.4	NA	NA	0.43
chr10:27483113:27484212:-@chr10:27482162:27482216:-@chr10:27477841:27477975:-	SE	0.00087233	0.26	0.29	0.29	0.43	0.33	0.27	0.28	0.12	0.35	0.35	0.31	0.33	0.2	0.31	0.43	0.33	0.29	0.57	0.36	0.42	0.24	0.29	0.23	0.27	0.29	0.28	0.29	0.25	0.23	0.14	0.13	0.15	0.15
chr10:29744292:29744347:+@chr10:29749426:29749708:+@chr10:29787209:29787722:+	SE	0.00717056	0.61	0.56	0.5	0.75	0.44	0.6	0.58	0.46	0.54	0.53	0.82	0.55	0.52	0.59	0.66	0.71	NA	0.4	0.48	0.6	0.62	0.69	0.65	0.69	0.65	0.75	0.64	0.67	0.66	0.7	0.75	0.5	0.65
chr10:3198421:3198572:-@chr10:3197605:3197715:-@chr10:3197426:3197526:-	SE	0.00858521	NA	NA	NA	0.72	0.75	0.73	0.74	NA	0.72	0.77	0.87	0.72	0.72	0.69	0.56	0.77	0.66	NA	0.68	0.78	0.63	0.56	0.74	NA	NA	0.79	0.58	0.65	0.58	0.48	0.55	0.55	0.69
chr10:3198421:3198572:-@chr10:3197605:3197719:-@chr10:3197426:3197526:-	SE	0.0002956	NA	NA	NA	0.74	0.7	0.74	0.75	NA	0.74	0.82	0.86	0.61	0.69	0.76	0.73	0.81	0.63	NA	0.73	0.78	0.57	0.58	0.65	0.61	NA	0.72	0.58	0.71	0.58	0.45	0.63	0.65	0.63
chr10:3204909:3205031:-@chr10:3202296:3202398:-@chr10:3202130:3202248:-@chr10:3199128:3199234:-	MXE	0.00799354	NA	NA	0.32	0.19	0.22	0.08	0.19	NA	0.41	0.29	0.13	0.18	0.18	0.27	NA	0.2	0.43	NA	0.19	0.2	NA	0.11	0.25	0.29	NA	0.53	0.32	0.31	0.43	0.55	0.61	0.68	0.32
chr10:38186119:38186569:-@chr10:38185369:38185466:-@chr10:38185230:38185271:-	SE	0.0455897	NA	NA	NA	0.41	0.39	0.4	0.48	0.46	0.5	0.4	0.25	0.66	0.34	0.43	NA	0.2	0.43	NA	0.28	0.56	NA	0.47	0.58	0.22	0.49	0.5	0.59	0.32	0.52	0.62	NA	0.53	0.65
chr10:44792812:44792844:-@chr10:44791717:44792811:-	TandemUTR	0.047824	0.58	0.51	0.6	0.54	0.47	0.45	0.42	0.53	0.51	0.5	0.55	0.45	0.53	0.49	0.44	0.57	0.65	0.58	NA	0.46	0.46	0.47	0.46	0.54	0.49	0.39	0.42	0.37	0.7	0.39	0.42	0.36	0.62
chr10:5004776:5004941:+@chr10:5008043:5008125:+@chr10:5009892:5012145:+	SE	0.0308101	0.68	0.87	0.73	0.79	0.91	0.92	0.93	0.86	0.88	0.8	0.94	0.94	0.93	0.82	0.83	0.93	0.8	0.69	0.55	0.88	0.77	0.77	0.97	0.77	0.74	0.77	0.83	0.85	0.68	0.78	0.69	0.69	0.71
chr10:50697330:50697546:-@chr10:50696439:50697118:-	RI	0.00440715	NA	0.79	0.88	0.8	0.74	0.88	0.91	0.53	0.83	0.88	0.95	0.85	0.71	0.84	0.83	0.91	0.88	NA	0.44	0.92	0.76	0.71	0.81	0.75	0.34	0.8	0.72	0.71	0.86	0.7	0.31	0.6	0.75
chr10:51235115:51235302:+@chr10:51249140:51249288:+@chr10:51250562:51250974:+	SE	0.0362006	0.85	0.95	0.96	0.95	0.9	0.84	0.96	0.64	0.96	0.96	0.97	0.95	0.92	0.98	0.9	0.91	0.96	0.71	0.97	0.97	0.91	0.9	0.96	0.95	0.77	0.95	0.82	0.89	0.85	0.91	0.87	0.9	0.75
chr10:5461133:5461192:+@chr10:5475718:5475837:+@chr10:5483793:5483900:+	SE	0.0476781	NA	NA	NA	NA	NA	NA	NA	NA	NA	0.49	0.54	NA	NA	0.56	NA	NA	NA	NA	NA	0.49	NA	0.32	NA	NA	NA	NA	NA	NA	NA	0.45	NA	0.45	NA
chr10:5876854:5876988:-@chr10:5876211:5876219:-@chr10:5867817:5868019:-	SE	0.0141677	0.69	0.48	0.42	0.66	0.56	0.5	0.58	0.81	0.6	0.65	0.53	0.54	0.5	0.49	0.62	0.61	0.54	0.64	0.53	0.55	0.91	0.54	0.65	0.78	0.47	0.62	0.69	0.67	0.64	0.6	0.76	0.62	0.83
chr10:5876988:5876854|5876850:-@chr10:5867817:5868019:-	A5SS	0.00749341	0.66	0.25	0.47	0.57	0.53	0.4	0.54	0.79	0.57	0.48	0.47	0.45	0.46	0.46	0.57	0.52	0.48	0.63	0.51	0.56	0.88	0.54	0.64	0.7	0.37	0.6	0.68	0.62	0.66	0.52	0.73	0.54	0.72
chr10:59815986:59816104:+@chr10:59816416:59816482:+@chr10:59817956:59818026:+	SE	0.0399796	NA	NA	NA	0.44	0.4	0.47	NA	NA	0.47	0.4	0.33	NA	NA	NA	NA	NA	0.48	NA	NA	0.48	NA	0.41	0.55	NA	NA	0.37	NA	0.54	0.56	0.54	NA	0.53	0.52
chr10:6106213:6106323:-@chr10:6103474:6103662:-@chr10:6101839:6101910:-	SE	0.0262367	NA	NA	NA	0.52	0.6	NA	0.48	NA	0.59	NA	0.58	0.54	0.56	NA	NA	NA	0.61	NA	NA	0.54	NA	0.42	0.49	NA	NA	NA	NA	NA	0.41	NA	NA	NA	NA
chr10:69721892:69722001:-@chr10:69721769:69721802:-@chr10:69716790:69718782:-	SE	0.0355815	0.58	0.77	0.68	0.74	0.72	0.71	0.73	0.57	0.84	0.78	0.92	0.94	0.58	0.96	0.73	0.76	0.46	0.61	0.47	0.89	0.56	0.87	0.89	0.5	0.52	0.6	0.45	0.77	0.48	0.68	0.68	0.46	0.42
chr10:69721892:69722001:-@chr10:69721773:69721802:-@chr10:69716790:69718782:-	SE	0.00453408	0.69	0.5	0.65	0.73	0.64	0.73	0.62	0.39	0.7	0.81	0.9	0.89	0.58	0.94	0.8	0.63	0.55	0.6	0.59	0.79	0.55	0.9	0.68	0.42	0.45	0.48	0.45	0.57	0.37	0.61	0.4	0.62	0.48
chr10:71547574:71547682:-@chr10:71546384:71546536:-	RI	0.0339963	NA	NA	NA	0.16	0.07	0.16	0.14	0.32	0.01	0.01	0.02	0.03	0.12	0.04	NA	0.14	0.02	NA	0.27	0.01	NA	0.6	NA	NA	NA	0.04	0.2	0.07	0.31	0.26	NA	0.3	NA
chr10:71600175:71600291:-@chr10:71591620:71591693:-@chr10:71591041:71591500:-	SE	0.0400262	NA	0.78	0.8	0.76	0.97	0.93	0.94	NA	0.93	0.9	0.98	0.93	0.91	0.86	0.78	0.98	0.95	NA	0.91	0.96	0.86	0.96	0.92	0.68	0.67	0.97	0.63	0.95	0.82	0.83	0.48	0.7	0.67
chr10:76405163:76406094|76405545:+@chr10:76407080:76407201:+	A5SS	0.0488845	NA	0.67	0.46	0.52	0.72	0.75	0.8	NA	0.74	0.59	0.43	0.75	0.5	0.53	0.61	0.87	0.65	0.7	0.49	0.71	0.47	0.71	0.31	0.55	0.4	0.62	NA	0.59	0.49	0.61	0.41	0.51	0.73
chr10:79250846:79251865:-@chr10:79249659:79249782:-@chr10:79249085:79249229:-	SE	0.0164216	NA	0.44	0.5	0.56	0.8	0.47	0.74	0.73	0.86	0.8	0.83	0.9	0.64	0.91	0.45	0.92	0.85	0.73	0.69	0.83	0.65	0.61	0.61	0.34	0.55	0.69	0.71	0.59	0.67	0.33	0.67	0.68	0.51
chr10:81905327:81905587:-@chr10:81904873:81905326:-	TandemUTR	0.0139901	0.28	0.07	0.06	0.12	0.12	0.04	0.08	0.1	0.1	0.03	0.06	0.08	0.08	0.06	0.14	0.07	0.09	0.5	0.1	0.05	0.12	0.16	0.26	0.18	0.14	0.16	0.51	0.09	0.12	0.06	0.35	0.16	0.05
chr10:81919048:81919094:-@chr10:81918705:81918892:-	RI	0.0268315	0.64	0.68	0.63	0.65	0.87	0.85	0.86	0.71	0.86	0.87	0.95	0.82	0.79	0.76	0.69	0.88	0.86	0.63	0.85	0.87	0.57	0.84	0.76	0.54	0.57	0.85	0.64	0.88	0.7	0.7	0.59	0.67	0.66
chr10:85892391:85892494|85892490:+@chr10:85893731:85894017:+	A5SS	0.0267422	0.76	0.8	0.85	0.84	0.93	0.92	0.9	0.69	0.77	0.87	0.99	0.9	0.76	0.72	0.77	0.85	0.6	0.56	0.84	0.76	0.85	0.95	0.9	0.89	0.47	0.91	0.9	0.96	0.89	0.95	0.8	0.87	0.92
chr10:85894611:85894756|85894752:+@chr10:85898466:85898574:+	A5SS	0.0250219	NA	0.62	0.63	0.76	0.89	0.85	0.83	NA	0.92	0.71	0.97	0.94	0.74	0.7	NA	0.84	0.86	0.79	0.87	0.84	0.57	0.96	0.73	0.53	0.53	0.81	0.74	0.96	0.7	0.74	0.6	0.61	0.66
chr10:85958465:85958617:+@chr10:85960737:85960901:+@chr10:85961384:85961451:+	SE	0.0467031	NA	NA	NA	0.44	0.51	0.51	0.63	NA	0.45	0.54	0.61	0.61	NA	0.63	NA	0.65	0.53	0.38	0.54	NA	NA	0.65	NA	0.27	NA	0.66	0.71	0.71	0.6	0.51	0.75	0.72	0.57
chr10:86227311:86227400:+@chr10:86249611:86249695:+@chr10:86263185:86268257:+	SE	0.0233536	0.41	0.41	0.34	0.61	0.47	0.49	0.48	0.51	0.33	0.75	0.38	0.29	0.31	0.71	0.44	0.75	0.45	0.64	0.48	0.48	0.66	0.46	0.49	0.69	0.6	0.56	0.73	0.46	0.53	0.57	0.67	0.64	0.54
chr10:88810652:88810789:-@chr10:88810425:88810562:-@chr10:88809898:88809978:-	SE	0.035489	0.74	0.63	0.54	0.74	0.81	0.57	0.83	0.46	0.79	0.71	0.9	0.81	0.69	0.8	0.49	0.82	0.65	0.49	0.76	0.83	0.57	0.58	0.79	0.64	0.36	0.74	0.46	0.77	0.68	0.58	0.54	0.52	0.54
chr10:89080629:89081009:-@chr10:89079509:89079580:-@chr10:89077930:89078016:-@chr10:89075939:89076409:-	MXE	0.014294	0.42	0.62	0.52	0.61	0.38	0.63	0.52	NA	0.47	NA	0.71	0.52	0.55	0.41	NA	0.35	0.44	0.32	0.61	0.43	0.46	0.63	0.7	0.59	NA	0.61	0.53	0.75	0.64	0.62	NA	0.48	0.7
chr10:91092298:91092452:-@chr10:91087932:91088072:-@chr10:91084251:91085271:-	SE	0.0220875	NA	NA	0.49	NA	0.48	0.41	0.57	NA	0.45	NA	0.46	NA	NA	NA	NA	0.37	NA	NA	NA	NA	NA	0.55	0.64	0.54	NA	NA	0.49	0.56	NA	NA	0.58	NA	NA
chr10:91142278:91142454:+@chr10:91149632:91149740:+@chr10:91152018:91153732:+	SE	0.0141838	0.4	0.48	0.65	0.35	0.4	0.43	0.6	0.61	0.57	0.43	0.56	0.64	0.42	0.44	0.4	0.56	0.44	0.35	0.52	0.14	0.28	0.32	0.53	0.41	0.39	0.34	0.29	0.37	0.37	0.57	0.41	0.42	0.38
chr10:96261330:96261401:+@chr10:96271702:96271830:+@chr10:96280949:96281207:+	SE	0.018481	NA	0.37	0.32	0.57	0.76	0.48	0.31	NA	0.42	0.46	0.67	0.51	0.35	NA	0.62	0.44	0.43	NA	NA	0.39	NA	0.73	0.46	0.65	NA	0.71	NA	0.77	0.4	0.81	NA	0.58	0.53
chr10:96483044:96483185:+@chr10:96483294:96483360:+@chr10:96485010:96485937:+	SE	0.0123988	0.54	0.28	0.44	0.78	0.62	0.54	0.74	0.92	0.47	0.66	0.71	0.48	0.63	0.62	0.58	0.75	0.5	0.67	0.68	0.67	0.21	0.44	0.61	NA	0.23	0.38	0.65	0.35	0.44	0.38	NA	0.69	0.62
chr10:97040567:97041072:-@chr10:97018525:97018609:-@chr10:97013611:97013810:-	SE	0.0476398	0.81	0.79	0.92	0.94	0.87	0.86	0.97	NA	0.89	0.94	0.96	0.96	0.67	0.98	0.87	0.95	0.96	0.64	0.96	0.94	0.86	0.85	0.91	0.81	0.73	0.98	0.76	0.84	0.89	0.83	0.8	0.54	0.94
chr10:97442667:97442785:-@chr10:97437339:97437466:-@chr10:97436994:97437102:-	SE	0.0292806	NA	0.69	0.6	0.74	0.78	0.69	0.49	NA	0.6	0.66	0.7	0.63	0.62	0.55	0.49	0.6	0.61	NA	0.57	0.69	0.41	0.61	0.48	0.63	0.64	0.56	0.57	0.71	0.53	0.4	0.56	0.5	0.55
chr10:98657415:98657494:+@chr10:98693860:98693992:+@chr10:98698755:98699042:+	SE	0.0244901	0.61	0.82	0.79	0.78	0.47	0.81	0.55	0.7	0.84	0.89	0.81	0.76	0.68	0.62	0.64	0.81	0.77	0.66	0.92	0.66	0.72	0.56	0.64	0.61	0.51	0.88	0.57	0.79	0.76	0.62	0.39	0.6	0.59
chr10:99211575:99211643:-@chr10:99211243:99211369:-	RI	0.0268831	NA	NA	NA	NA	0.48	0.38	0.35	NA	NA	NA	0.15	NA	NA	NA	NA	0.48	0.42	NA	NA	NA	NA	0.5	NA	NA	NA	0.53	NA	0.5	NA	NA	NA	NA	NA
chr10:99219393:99219470:-@chr10:99218851|99218873:99218713:-	A3SS	0.0276771	NA	NA	NA	0.44	0.63	0.62	NA	0.65	NA	NA	0.65	NA	NA	0.55	NA	0.52	0.61	NA	NA	NA	NA	0.72	0.61	NA	NA	0.66	0.67	0.7	NA	NA	NA	NA	NA
chr10:99228136:99228057|99228051:-@chr10:99227309:99227676:-	A5SS	0.027803	NA	NA	NA	NA	0.6	0.63	0.5	NA	0.45	NA	0.52	NA	NA	NA	NA	NA	NA	NA	NA	NA	NA	0.49	0.39	NA	NA	0.45	NA	0.41	0.42	NA	NA	NA	NA
chr10:99486854:99487068:+@chr10:99492841:99492911:+@chr10:99494476:99494695:+	SE	0.0157437	0.71	0.73	NA	0.79	0.47	NA	0.69	0.66	0.58	0.57	0.75	0.8	NA	NA	NA	0.5	0.53	0.67	0.83	0.75	0.55	0.69	0.51	NA	0.32	0.56	NA	0.5	0.68	0.33	0.68	0.37	NA
chr11:104344456:104345372:-@chr11:104332534:104332632:-@chr11:104330684:104330938:-	SE	0.0281665	0.53	0.24	0.54	0.19	0.28	0.23	0.39	0.23	0.34	0.31	0.15	0.3	0.36	0.17	0.15	0.24	0.15	0.26	0.33	0.5	0.41	0.26	0.15	0.55	0.68	0.25	0.78	0.19	0.38	0.34	0.62	0.75	0.51
chr11:104410145:104410639:-@chr11:104409001:104409063:-@chr11:104406791:104407217:-	SE	0.00569801	0.73	0.87	0.84	0.93	0.81	0.65	0.83	0.58	0.8	0.83	0.88	0.86	0.68	0.79	0.75	0.7	0.93	0.72	0.73	0.76	0.5	0.7	0.89	0.62	0.61	0.63	0.41	0.75	0.79	0.78	0.54	0.48	0.71
chr11:10778213:10778647:-@chr11:10777879|10777897:10777675:-	A3SS	0.0114566	0.47	0.36	0.49	0.37	0.4	0.35	0.49	0.8	0.58	0.58	0.5	0.41	0.36	0.63	0.45	0.49	0.58	0.6	0.54	0.58	0.26	0.35	0.43	0.4	0.28	0.48	0.69	0.43	0.38	0.33	0.31	0.45	0.45
chr11:110755097:110755627:-@chr11:110753709:110753787:-@chr11:110734723:110734853:-	SE	0.0446879	0.84	0.68	0.83	0.93	0.84	0.76	0.89	0.77	0.82	0.42	0.91	0.82	0.86	0.42	0.83	0.64	0.94	0.67	0.68	0.7	0.76	0.87	0.85	0.88	NA	0.86	0.94	0.75	0.94	0.79	0.83	0.89	0.93
chr11:110916443:110916863:+@chr11:110917497:110917520:+@chr11:110919858:110920155:+	SE	0.015873	NA	NA	NA	0.72	0.39	NA	0.53	NA	NA	NA	0.7	NA	NA	NA	NA	0.31	NA	NA	NA	NA	NA	0.24	0.2	NA	NA	0.18	NA	0.34	0.13	NA	NA	NA	NA
chr11:111462758:111462893:+@chr11:111463791:111463907:+@chr11:111464801:111465877:+	SE	0.00410078	0.93	0.84	0.95	0.91	0.95	0.94	0.9	0.9	0.95	0.97	0.95	0.96	0.91	0.94	0.92	0.95	0.96	0.76	0.94	0.94	0.84	0.93	0.9	0.9	0.9	0.96	0.87	0.89	0.89	0.78	0.76	0.93	0.77
chr11:111462758:111462893:+@chr11:111463791:111463911:+@chr11:111464801:111465877:+	SE	0.00408195	0.92	0.83	0.94	0.91	0.94	0.93	0.9	0.88	0.93	0.96	0.93	0.96	0.9	0.94	0.93	0.94	0.96	0.69	0.94	0.92	0.83	0.9	0.9	0.9	0.87	0.95	0.86	0.88	0.86	0.77	0.74	0.93	0.76
chr11:111464801:111464945:+@chr11:111467013:111467066:+@chr11:111470739:111471727:+	SE	0.0192448	0.66	0.23	0.39	0.37	0.36	0.37	0.46	0.67	0.32	0.65	0.45	0.59	0.24	0.61	0.5	0.47	0.63	0.54	0.55	0.57	0.32	0.34	0.45	0.36	0.25	0.48	0.69	0.34	0.21	0.23	0.22	0.44	0.4
chr11:111464801:111464945:+@chr11:111469014:111469143:+@chr11:111470739:111471727:+	SE	0.0218395	0.1	0.06	0.08	0.06	0.09	0.11	0.1	0.28	0.09	0.21	0.09	0.18	0.05	0.2	0.15	0.1	0.3	0.13	0.17	0.25	0.02	0.07	0.07	0.06	0.07	0.1	0.25	0.07	0.06	0.05	0.06	0.12	0.14
chr11:116252179:116252289:-@chr11:116251792:116251935:-@chr11:116251213:116251377:-	SE	0.0271839	NA	NA	0.56	0.64	0.73	0.56	0.75	NA	0.69	0.67	0.86	0.81	0.64	0.63	NA	0.8	0.62	0.61	0.68	0.61	NA	0.57	0.59	0.69	NA	0.62	NA	0.63	0.58	NA	NA	0.53	0.56
chr11:116667638:116668191:-@chr11:116666826:116666975:-@chr11:116666386:116666585:-	SE	0.0064755	NA	NA	0.73	0.83	0.79	0.82	0.8	0.69	0.66	0.82	0.93	0.72	0.74	0.79	NA	0.77	0.77	NA	0.43	0.83	0.58	0.72	0.72	0.7	NA	0.66	0.74	0.48	0.7	0.69	0.72	NA	NA
chr11:118393973:118393878|118393845:-@chr11:118393282:118393465:-	A5SS	0.0365321	0.86	0.91	0.81	0.83	0.85	0.91	0.89	0.78	0.79	0.82	0.85	0.87	0.83	0.79	0.96	0.91	0.82	0.91	0.79	0.8	0.94	0.91	0.89	0.88	0.95	0.85	0.92	0.87	0.83	0.91	0.88	0.96	0.78
chr11:118477415:118478334:-@chr11:118476938:118476961:-@chr11:118476550:118476763:-	SE	0.00613879	NA	0.69	0.59	0.61	0.72	0.71	0.59	0.35	0.87	0.74	0.71	0.75	0.55	0.46	0.58	0.75	0.78	NA	0.74	0.83	0.35	0.59	0.59	0.34	NA	0.74	0.52	0.61	0.58	0.35	0.44	0.51	0.59
chr11:118477415:118478334:-@chr11:118476938:118476967:-@chr11:118476550:118476763:-	SE	0.00346727	NA	0.65	0.52	0.6	0.74	0.76	0.4	0.51	0.85	0.79	0.64	0.78	0.68	0.82	0.52	0.82	0.86	NA	0.78	0.7	0.33	0.53	0.57	0.4	NA	0.77	0.43	0.63	0.54	0.49	0.55	0.55	0.33
chr11:119701045:119701287:+@chr11:119703385:119703559:+@chr11:119705896:119709608:+	SE	0.0217799	NA	0.52	0.56	0.64	0.59	0.58	0.36	NA	0.46	NA	0.42	0.5	0.53	0.76	NA	0.55	0.56	0.44	0.51	0.61	0.49	0.23	0.38	0.44	NA	0.45	0.48	0.72	0.42	0.34	NA	NA	NA
chr11:119783657:119783742:+@chr11:119785313:119785369:+@chr11:119796672:119796770:+	SE	0.0369283	NA	0.58	0.47	0.47	0.53	0.53	NA	NA	0.57	0.61	0.51	0.47	NA	0.69	0.51	0.52	0.42	NA	0.6	0.51	0.43	0.63	0.58	NA	NA	0.41	0.39	0.49	0.34	0.36	0.51	NA	0.44
chr11:121477365:121478095:-@chr11:121476292:121476324:-@chr11:121465021:121467658:-	SE	0.0234464	NA	0.66	0.44	0.38	0.6	0.55	0.58	0.38	0.48	0.56	0.52	0.59	0.62	0.63	0.65	0.36	0.77	0.53	0.47	0.53	0.49	0.25	0.44	0.56	0.5	0.4	0.47	0.57	0.52	0.5	0.32	0.36	0.52
chr11:122435734:122435946:-@chr11:122435391:122435642:-	RI	0.0334145	0.78	0.67	0.81	0.75	0.75	0.78	0.82	0.89	0.84	0.91	0.78	0.89	0.61	0.9	0.77	0.78	0.88	0.83	0.91	0.91	0.75	0.73	0.81	0.78	0.65	0.85	0.95	0.77	0.72	0.68	0.68	0.75	0.75
chr11:122437247:122437038|122437034:-@chr11:122436034:122436716:-	A5SS	0.0407704	0.75	0.21	0.2	0.8	0.77	0.41	0.32	0.52	0.28	0.33	0.47	0.45	0.26	0.33	0.57	0.36	0.31	0.9	0.34	0.94	0.89	0.23	0.92	0.89	0.63	0.39	0.96	0.83	0.76	0.18	0.71	0.8	0.8
chr11:123997953:124001009:+@chr11:124001579:124001715:+@chr11:124001799:124001857:+@chr11:124002010:124002156:+	MXE	0.0268698	0.65	0.73	0.53	0.47	0.45	0.75	0.55	0.65	0.7	0.69	0.49	0.87	0.65	0.79	0.67	0.57	0.27	0.52	0.7	0.75	0.52	0.69	0.43	0.32	0.61	0.37	0.5	0.64	0.26	0.59	0.54	0.54	0.65
chr11:124007344:124007543:+@chr11:124007544:124009819:+	TandemUTR	0.0308663	0.61	0.56	0.31	0.27	0.53	0.5	0.7	0.52	0.56	0.56	0.51	0.54	0.55	0.62	0.62	0.45	0.59	0.43	0.63	0.62	0.43	0.48	0.48	0.57	0.41	0.69	0.5	0.39	0.47	0.5	0.48	0.45	0.47
chr11:124069552:124069680:+@chr11:124069681:124069895:+	TandemUTR	0.029401	NA	NA	NA	0.36	NA	0.42	NA	NA	NA	NA	0.51	NA	NA	NA	NA	NA	NA	NA	0.48	NA	NA	0.61	NA	NA	NA	0.52	NA	0.63	NA	0.52	NA	NA	NA
chr11:124131647:124132643:-@chr11:124131436|124131468:124131313:-	A3SS	0.0342039	NA	NA	NA	NA	0.81	NA	0.75	NA	NA	NA	0.67	NA	NA	NA	NA	0.71	NA	NA	NA	NA	NA	0.67	0.52	NA	NA	0.55	NA	0.65	NA	0.67	NA	NA	NA
chr11:124251555:124252038:+@chr11:124252373:124252415:+@chr11:124252625:124253902:+	SE	0.0103097	NA	NA	NA	0.61	0.78	0.74	0.7	NA	0.59	NA	0.71	NA	NA	NA	NA	0.74	0.69	NA	NA	NA	NA	0.58	0.57	NA	NA	0.5	0.66	0.49	NA	NA	NA	NA	NA
chr11:124251555:124252038:+@chr11:124252391:124252415:+@chr11:124252625:124253902:+	SE	0.0053504	NA	NA	NA	0.75	0.63	0.65	0.8	NA	0.52	NA	0.73	NA	NA	NA	NA	0.64	0.7	NA	NA	NA	NA	0.52	0.39	NA	NA	0.48	0.46	0.47	NA	NA	NA	NA	NA
chr11:124955199:124955310:+@chr11:124956317:124956428:+@chr11:124957452:124959342:+	SE	0.048538	0.7	0.73	0.83	0.78	0.88	0.92	0.93	0.51	0.71	0.87	0.96	0.84	0.85	0.73	0.58	0.89	0.83	0.67	0.88	0.9	0.81	0.92	0.8	0.65	0.52	0.83	0.48	0.87	0.49	0.76	0.65	0.63	0.77
chr11:125637238:125637737:+@chr11:125637738:125638037:+	TandemUTR	0.00497479	NA	0.22	0.19	0.81	0.64	0.39	0.52	NA	0.55	0.45	0.45	0.47	0.5	0.65	NA	0.7	0.44	NA	0.5	0.22	0.61	0.65	0.57	0.67	0.62	0.77	0.66	0.77	0.71	0.54	0.49	0.75	0.62
chr11:125658024:125658258:+@chr11:125665567:125665690:+@chr11:125665908:125666066:+	SE	0.0356867	NA	NA	NA	NA	0.73	NA	NA	NA	0.69	NA	0.64	NA	0.69	0.64	NA	0.65	NA	0.7	0.82	0.7	NA	0.69	0.54	NA	NA	0.58	NA	NA	NA	0.62	NA	NA	NA
chr11:13332424:13332571:+@chr11:13334862:13334900:+@chr11:13335178:13335219:+	SE	0.015873	NA	0.3	NA	0.42	NA	NA	NA	NA	NA	NA	NA	0.45	0.41	NA	NA	NA	NA	NA	NA	NA	NA	NA	0.56	0.59	NA	NA	NA	NA	NA	0.48	NA	0.49	0.64
chr11:13347741:13347890:+@chr11:13350286|13350289:13350532:+	A3SS	0.0183541	NA	0.46	NA	0.88	0.72	0.63	0.71	NA	0.69	0.54	0.69	0.68	0.51	0.89	NA	0.67	0.7	NA	0.56	0.71	NA	0.41	0.63	NA	NA	0.64	NA	0.62	0.65	0.47	NA	0.32	0.56
chr11:133515762:133515875:+@chr11:133519346:133519498:+@chr11:133519897:133520536:+	SE	0.0335988	NA	NA	0.85	0.89	0.88	0.84	0.88	0.61	0.86	0.71	0.92	0.85	0.69	0.91	NA	0.87	0.82	NA	NA	0.84	0.72	0.88	0.79	0.52	NA	0.9	0.79	0.81	0.7	0.77	0.83	0.62	0.24
chr11:133515762:133515875:+@chr11:133519349:133519498:+@chr11:133519897:133520536:+	SE	0.0378052	NA	NA	0.78	0.81	0.89	0.76	0.86	0.63	0.83	0.63	0.87	0.78	0.76	0.9	NA	0.86	0.82	NA	NA	0.85	0.68	0.86	0.79	0.62	NA	0.88	0.75	0.77	0.7	0.73	0.78	0.61	0.32
chr11:13356460:13356572:+@chr11:13359290:13359377:+	RI	0.021412	NA	NA	NA	0.41	0.56	0.61	0.53	NA	0.48	0.45	0.46	0.43	0.55	0.55	NA	0.39	NA	NA	0.5	0.47	NA	0.56	0.62	NA	NA	0.51	0.66	0.67	0.52	NA	NA	NA	0.53
chr11:133624271:133624366:-@chr11:133623913:133624063:-@chr11:133623366:133623588:-	SE	0.0200962	0.85	0.85	0.78	0.87	0.65	0.85	0.86	0.68	0.82	0.86	0.84	0.59	0.49	0.89	0.66	0.82	0.83	NA	0.57	0.68	0.52	0.72	0.76	0.41	0.41	0.78	0.69	0.72	0.59	0.69	0.75	0.59	0.74
chr11:133628615:133628813:+@chr11:133633619:133633728:+@chr11:133634112:133635029:+	SE	0.0293146	NA	NA	NA	0.54	0.51	0.38	0.35	NA	0.37	NA	0.36	0.76	NA	NA	0.54	0.62	0.53	NA	0.64	NA	0.56	0.82	0.56	NA	NA	0.55	NA	0.81	NA	0.69	NA	0.54	NA
chr11:14476960:14477906:-@chr11:14472695:14472849:-@chr11:14472332:14472561:-	SE	0.0478801	0.29	0.09	0.12	0.06	0.09	0.1	0.16	0.27	0.12	0.22	0.1	0.13	0.09	0.23	0.11	0.06	0.13	0.51	0.12	0.21	0.09	0.04	0.21	0.1	0.18	0.06	0.12	0.11	0.08	0.02	0.05	0.09	0.21
chr11:14492525:14492613:-@chr11:14491939:14492027:-	RI	0.0446987	0.56	0.49	0.55	0.49	0.55	0.52	0.53	NA	0.6	NA	0.58	0.46	0.59	0.51	0.44	0.49	0.6	0.62	0.58	0.53	0.48	0.59	0.44	0.43	0.53	0.49	0.55	0.55	0.45	0.5	0.43	0.39	0.57
chr11:14782066:14782172:+@chr11:14793390:14793541:+@chr11:14796305:14796515:+	SE	0.00366122	NA	NA	NA	0.18	0.03	0.17	0.24	NA	0.07	0.04	0.18	0.09	0.15	0.34	NA	0.14	0.16	0.14	0.43	0.32	0.27	0.11	0.61	0.61	NA	0.26	0.58	0.24	0.3	0.34	0.26	0.62	0.33
chr11:15168823:15168936:+@chr11:15178946:15179071:+@chr11:15199599:15199770:+	SE	0.0327245	NA	NA	NA	0.6	0.68	0.53	0.64	NA	0.52	NA	0.66	NA	0.42	0.55	NA	0.67	NA	NA	0.67	NA	NA	0.42	0.55	NA	NA	NA	NA	0.42	NA	0.37	NA	NA	NA
chr11:17978620:17978680:-@chr11:17977617:17977695:-@chr11:17973919:17974032:-	SE	0.0319491	NA	NA	NA	0.35	0.45	NA	0.43	NA	NA	NA	0.45	NA	NA	NA	NA	0.52	NA	NA	NA	0.47	NA	0.64	0.57	NA	NA	0.51	NA	NA	0.52	NA	NA	NA	NA
chr11:18313877:18314069:+@chr11:18316232:18316397:+@chr11:18317687:18317780:+	SE	0.0155894	0.67	0.68	0.63	0.68	0.75	0.72	0.75	NA	0.81	0.74	0.89	0.65	0.54	0.73	NA	0.77	0.81	0.55	0.74	0.76	0.53	0.89	0.56	0.7	0.71	0.54	NA	0.63	0.63	0.53	0.63	0.68	0.64
chr11:18378607:18379133:+@chr11:18380963:18381081:+@chr11:18381817:18381934:+	SE	0.0210342	0.85	0.72	0.82	0.8	0.79	0.8	0.86	0.88	0.89	0.94	0.91	0.9	0.67	0.94	0.84	0.91	0.97	0.86	0.91	0.94	0.76	0.76	0.87	0.91	0.78	0.96	0.8	0.84	0.76	0.7	0.65	0.74	0.75
chr11:18378607:18379133:+@chr11:18380963:18381133:+@chr11:18381817:18381934:+	SE	0.0351966	0.9	0.77	0.88	0.84	0.87	0.88	0.9	0.96	0.94	0.97	0.93	0.93	0.71	0.97	0.88	0.94	0.98	0.92	0.94	0.97	0.79	0.82	0.91	0.93	0.75	0.97	0.94	0.9	0.83	0.73	0.76	0.83	0.84
chr11:18378607:18379133:+@chr11:18380963:18381136:+@chr11:18381817:18381934:+	SE	0.036896	0.91	0.8	0.9	0.86	0.89	0.89	0.91	0.97	0.95	0.98	0.94	0.94	0.74	0.97	0.89	0.95	0.99	0.95	0.94	0.97	0.81	0.84	0.92	0.93	0.82	0.98	0.95	0.91	0.84	0.76	0.8	0.85	0.86
chr11:18380963:18381136|18381081:+@chr11:18381817:18381934:+	A5SS	0.0355088	0.93	0.9	0.95	0.95	0.96	0.94	0.94	0.87	0.94	0.96	0.99	0.95	0.94	0.98	0.91	0.94	0.95	0.89	0.95	0.97	0.9	0.95	0.94	0.92	0.66	0.97	0.88	0.95	0.92	0.87	0.86	0.94	0.91
chr11:197303:197833:-@chr11:196038|196060:195952:-	A3SS	0.0430277	NA	NA	NA	NA	0.41	0.44	0.58	NA	NA	NA	0.79	0.55	0.58	NA	NA	0.39	0.55	NA	NA	0.55	NA	0.6	0.67	NA	NA	0.73	0.77	0.71	NA	0.55	NA	NA	NA
chr11:197303:197833:-@chr11:196043|196060:195952:-	A3SS	0.00795388	NA	NA	NA	NA	0.52	0.36	0.6	NA	NA	NA	0.72	0.45	0.55	NA	NA	0.51	0.51	NA	NA	0.48	NA	0.64	0.67	NA	NA	0.62	0.85	0.75	NA	0.63	NA	NA	NA
chr11:3018702:3018837:-@chr11:3018254:3018387:-@chr11:3017641:3017737:-	SE	0.0247867	NA	NA	NA	0.72	0.56	0.58	0.68	NA	0.7	0.66	0.65	0.64	0.59	0.62	NA	0.59	0.61	NA	0.69	0.69	NA	0.56	0.58	NA	NA	0.65	NA	0.51	0.47	0.56	NA	0.66	NA
chr11:3035149:3035247:-@chr11:3020062|3020136:3019971:-	A3SS	0.0273722	NA	NA	NA	0.6	0.52	0.38	0.42	0.46	0.5	0.4	0.45	0.48	NA	NA	NA	0.54	0.59	NA	0.55	0.43	NA	0.63	0.47	NA	NA	0.59	0.61	0.46	0.55	0.52	0.58	0.64	NA
chr11:32567669:32567773|32567763:+@chr11:32571988:32573135:+	A5SS	0.0122089	0.44	NA	0.57	0.59	0.46	0.58	0.52	NA	0.63	0.39	0.51	0.36	0.34	0.36	0.64	0.46	0.47	0.5	0.52	0.4	0.37	0.24	0.34	0.38	0.48	0.43	0.48	0.24	0.34	0.34	0.51	0.25	0.53
chr11:32909865:32910496:+@chr11:32911214:32913557:+	RI	0.020948	0.9	0.72	0.85	0.9	0.92	0.82	0.9	0.48	0.93	0.84	0.91	0.97	0.89	0.79	0.87	0.91	0.86	0.78	0.87	0.89	0.77	0.78	0.9	0.83	0.65	0.83	0.67	0.87	0.9	0.84	0.76	0.75	0.83
chr11:33139421:33139652:-@chr11:33122992:33123095:-@chr11:33119470:33120108:-	SE	0.00673173	0.67	0.5	0.72	0.69	0.41	0.21	0.42	0.26	0.43	0.42	0.44	0.51	0.31	0.38	0.42	0.63	0.47	0.47	0.43	0.27	0.57	0.33	0.48	0.53	0.62	0.55	0.77	0.44	0.61	0.73	0.6	0.72	0.71
chr11:33139421:33139652:-@chr11:33134830:33134925:-@chr11:33119470:33120108:-	SE	0.0426015	0.68	0.54	0.78	0.72	0.43	0.19	0.51	0.3	0.48	0.42	0.49	0.55	0.37	0.41	0.49	0.66	0.5	0.61	0.36	0.29	0.77	0.42	0.56	0.53	0.53	0.55	0.74	0.48	0.64	0.72	0.35	0.79	0.78
chr11:3348876:3348781|3348749:-@chr11:3339549:3339695:-	A5SS	0.0221735	NA	NA	0.52	NA	NA	NA	0.6	NA	NA	NA	0.62	NA	NA	0.75	NA	0.64	NA	NA	0.6	NA	NA	0.48	0.57	NA	NA	NA	NA	0.59	0.38	0.45	NA	NA	NA
chr11:3355423:3355706:-@chr11:3351383:3351447:-@chr11:3349383:3349509:-	SE	0.0136295	NA	NA	NA	NA	0.63	0.63	0.76	NA	0.71	0.67	0.49	0.64	0.61	0.46	NA	0.67	NA	NA	NA	0.62	NA	0.28	NA	NA	NA	0.58	0.58	0.56	NA	NA	0.6	NA	0.34
chr11:33732622:33732577|33731233:-@chr11:33729645:33729729:-	A5SS	0.0230695	NA	NA	NA	0.31	0.59	0.44	0.52	NA	0.46	NA	0.39	0.41	0.52	0.48	NA	0.4	0.49	0.46	0.37	0.54	NA	0.54	0.51	NA	NA	0.44	NA	0.73	0.51	0.56	0.47	0.54	0.63
chr11:33847832:33848109:-@chr11:33847468:33847708:-	RI	0.015873	NA	NA	NA	NA	0.42	NA	0.49	0.43	NA	NA	0.57	NA	NA	NA	NA	NA	NA	NA	NA	NA	NA	0.59	0.73	NA	NA	0.64	0.66	0.72	NA	NA	NA	NA	NA
chr11:34030339:34030759:+@chr11:34049849:34049911:+@chr11:34050024:34050110:+	SE	0.0438439	0.69	0.66	0.87	0.87	0.94	0.89	0.93	0.93	0.85	0.81	0.92	0.82	0.74	0.84	0.52	0.9	0.92	0.69	0.73	0.87	0.88	0.9	0.96	0.88	0.7	0.94	0.93	0.9	0.87	0.9	0.81	0.93	0.93
chr11:34860619:34860838:-@chr11:34860489:34860618:-	TandemUTR	0.0149897	NA	NA	0.52	0.72	0.67	0.7	0.66	NA	0.7	0.76	0.86	0.64	0.77	NA	NA	0.69	0.62	NA	0.7	0.68	0.65	0.82	0.52	0.42	0.61	0.68	0.54	0.59	0.58	0.76	0.59	0.59	0.59
chr11:35167785:35168188:+@chr11:35182635:35182763:+@chr11:35184235:35184366:+	SE	0.0180654	0.57	0.34	0.36	0.63	0.62	0.45	0.58	NA	0.77	0.81	0.61	0.66	0.71	0.87	0.72	0.67	0.66	0.36	NA	0.56	0.32	0.56	0.62	0.38	0.45	0.59	0.35	0.56	0.49	0.29	0.35	0.73	0.57
chr11:35167785:35168188:+@chr11:35188088:35188177:+@chr11:35189369:35190301:+	SE	0.0181789	0.66	0.74	0.7	0.72	0.73	0.72	0.85	0.62	0.73	0.84	0.76	0.87	0.9	0.84	0.7	0.83	0.61	0.66	0.72	0.84	0.47	0.67	0.8	0.63	0.45	0.66	0.49	0.72	0.68	0.53	0.71	0.77	0.82
chr11:35167958:35168095:+@chr11:35189369:35189572:+@chr11:35192975:35193037:+	SE	0.0447607	NA	0.4	0.5	0.61	0.54	0.58	0.51	0.47	0.36	NA	0.6	0.48	0.45	0.61	NA	0.47	0.52	0.43	NA	0.57	NA	0.51	0.5	NA	NA	0.64	0.59	0.61	0.54	0.51	0.63	0.56	0.58
chr11:3738432:3738345|3738294:-@chr11:3731122:3731214:-	A5SS	0.0311758	NA	0.51	0.52	0.47	0.51	0.52	0.62	NA	0.53	0.54	0.36	0.58	NA	0.53	NA	0.56	0.61	NA	0.47	NA	0.42	0.46	NA	NA	NA	0.49	0.48	0.59	0.42	0.41	NA	0.47	NA
chr11:3818700:3818789:-@chr11:3808336:3808454:-@chr11:3804779:3806012:-	SE	0.0323852	0.47	0.3	0.58	0.28	0.25	0.16	0.28	0.43	0.2	0.14	0.18	0.29	0.09	0.07	0.16	0.31	0.06	0.28	0.05	0.05	0.65	0.28	0.26	0.24	0.45	0.34	0.35	0.18	0.2	0.23	0.53	0.33	0.53
chr11:43301556:43301762:+@chr11:43304633:43304737:+@chr11:43305915:43306004:+	SE	0.0265506	0.51	0.81	0.81	0.72	0.85	0.83	0.85	NA	0.85	0.91	0.85	0.81	0.86	0.85	0.64	0.81	0.86	0.59	0.9	0.81	0.53	0.77	0.71	0.84	0.55	0.89	0.82	0.85	0.55	0.73	0.58	0.58	0.52
chr11:43732172:43732247:+@chr11:43776449:43776553:+@chr11:43793563:43794248:+	SE	0.0254083	NA	NA	NA	0.69	0.61	0.59	0.75	NA	0.76	0.74	0.92	0.68	0.48	0.59	NA	0.62	0.71	0.62	0.69	0.79	NA	0.77	0.65	0.7	0.41	0.31	0.48	0.7	0.31	0.58	NA	0.42	0.48
chr11:44596288:44596491:+@chr11:44596766:44596849:+@chr11:44597175:44598759:+	SE	0.0309084	0.74	0.74	0.81	0.85	0.82	0.86	0.8	0.93	0.8	0.82	0.78	0.87	0.71	0.86	0.71	0.82	0.88	0.87	0.93	0.85	0.89	0.76	0.79	0.55	0.61	0.85	0.89	0.76	0.72	0.77	0.75	0.7	0.53
chr11:46070310:46070350:-@chr11:46068582:46068708:-@chr11:46062293:46062429:-	SE	0.0357701	NA	NA	NA	NA	NA	NA	0.42	NA	NA	NA	0.38	NA	0.48	0.4	NA	NA	NA	NA	0.48	NA	NA	0.49	0.53	NA	NA	NA	NA	0.59	NA	NA	NA	NA	NA
chr11:47153142:47153225:-@chr11:47151886:47152009:-@chr11:47151553:47151609:-	SE	0.0449075	NA	NA	0.63	0.57	0.49	0.49	0.55	0.51	0.6	0.54	0.36	0.5	0.52	0.46	NA	0.35	0.45	NA	0.48	0.46	0.48	0.45	0.38	NA	NA	0.46	0.29	0.44	0.43	0.56	NA	0.41	0.5
chr11:47239368:47239576:+@chr11:47239674:47240145:+	RI	0.0405748	0.6	0.49	0.4	0.48	0.48	0.4	0.32	0.67	0.33	0.44	0.41	0.38	0.4	0.48	NA	0.47	0.58	NA	0.73	0.57	0.23	0.41	0.3	0.24	NA	0.27	0.71	0.46	0.32	0.45	NA	0.52	0.27
chr11:47460984:47460823|47460819:-@chr11:47457005:47457080:-	A5SS	0.0291069	NA	0.59	0.52	0.43	0.63	0.35	0.5	0.59	0.62	0.62	0.81	0.54	0.44	NA	NA	0.75	0.28	NA	0.63	NA	NA	0.57	0.74	0.61	0.62	0.79	NA	0.67	0.7	0.66	0.58	0.65	0.68
chr11:47710665:47710798:-@chr11:47710245:47710347:-@chr11:47709409:47709689:-	SE	0.00429854	NA	NA	0.48	0.74	0.73	0.52	0.86	NA	0.69	0.78	0.49	0.81	0.22	0.65	NA	0.68	0.62	NA	0.61	0.89	0.53	0.42	0.21	0.45	0.6	0.41	0.26	0.44	0.5	0.66	NA	0.48	0.65
chr11:47722081:47722492:-@chr11:47717983:47718231:-@chr11:47714744:47714868:-	SE	0.0247995	0.48	NA	0.35	0.23	0.09	0.28	0.06	NA	0.14	0.24	0.03	0.27	0.06	0.21	0.32	0.19	0.24	0.24	0.11	0.22	0.1	0.02	0.08	0.14	0.18	0.07	0.15	0.06	0.04	0.09	0.19	0.1	0.34
chr11:489825:489999:-@chr11:489015:489185:-	RI	0.0499933	NA	0.58	0.06	0.09	0.03	0.04	0.06	0.02	0.12	0.04	0.05	0.04	0.07	0.05	0.43	0.04	0.05	NA	0.05	0.06	0.58	0.1	0.08	0.03	NA	0.05	0.06	0.1	0.24	0.28	0.19	0.22	0.05
chr11:489829:489999:-@chr11:489015:489185:-	RI	0.0143284	NA	0.45	0.08	0.09	0.03	0.04	0.06	0.01	0.11	0.04	0.05	0.04	0.08	0.05	0.25	0.03	0.04	NA	0.06	0.05	0.5	0.09	0.08	0.05	NA	0.05	0.05	0.1	0.22	0.15	0.22	0.26	0.1
chr11:494824:495874:-@chr11:492181|492249:492062:-	A3SS	0.0385629	NA	0.57	0.53	0.8	0.79	0.91	0.82	0.73	0.72	0.87	0.83	0.81	0.5	0.78	NA	0.86	0.87	0.41	0.84	0.96	0.66	0.78	0.77	0.68	NA	0.7	0.51	0.8	0.61	0.81	0.4	NA	0.66
chr11:550956:551033:+@chr11:551762:551892:+@chr11:552079:552776:+	SE	0.0378635	0.41	0.75	0.62	0.86	0.93	0.89	0.9	0.54	0.91	0.97	0.96	0.92	0.8	0.93	0.67	0.94	0.95	NA	0.93	0.93	0.65	0.93	0.89	0.42	0.64	0.88	0.7	0.98	0.77	0.68	0.42	0.41	0.48
chr11:553189:553317:+@chr11:553396:553478:+	RI	0.0411323	NA	NA	NA	NA	0.61	0.56	0.54	0.45	NA	0.65	0.78	0.57	NA	NA	NA	0.66	0.62	NA	0.6	0.63	NA	0.69	0.8	NA	NA	0.66	0.61	0.68	NA	NA	NA	NA	NA
chr11:57340356:57342493:+@chr11:57342494:57343228:+	TandemUTR	0.0338619	0.4	0.35	0.33	0.45	0.51	0.5	0.5	0.08	0.36	0.28	0.46	0.23	0.45	0.21	0.4	0.41	0.22	0.62	0.45	0.21	0.54	0.6	0.46	0.56	0.46	0.53	0.27	0.55	0.33	0.45	0.38	0.43	0.49
chr11:59099528:59100624:-@chr11:59098445:59099527:-	TandemUTR	0.0323852	0.77	0.87	0.78	0.88	0.81	0.86	0.86	0.66	0.95	0.9	0.82	0.56	0.89	0.81	0.71	0.91	0.73	0.38	0.56	0.72	0.84	0.83	0.85	0.73	0.73	0.96	0.87	0.92	0.92	0.96	0.9	0.9	0.83
chr11:609306:609390:-@chr11:608599:609180:-@chr11:607954:608111:-	SE	0.0324432	0.3	0.73	0.56	0.76	0.6	0.69	0.71	0.38	0.82	0.84	0.55	0.82	0.49	0.83	0.64	0.71	0.67	0.67	0.51	0.65	0.63	0.49	0.66	0.48	0.62	0.51	0.24	0.58	0.76	0.51	0.46	0.55	0.66
chr11:614213:614416:-@chr11:611812:611904:-@chr11:611558:611663:-	SE	0.0440215	0.87	0.81	0.87	0.74	0.88	0.88	0.92	0.9	0.91	0.87	0.98	0.89	0.74	0.97	0.89	0.89	0.67	0.65	0.84	0.94	0.77	0.86	0.87	0.74	0.58	0.94	0.75	0.88	0.86	0.87	0.64	0.84	0.78
chr11:61489160:61489092|61489031:-@chr11:61488203:61488939:-	A5SS	0.0489441	0.93	0.84	0.9	0.93	0.91	0.91	0.91	0.95	0.91	0.92	0.9	0.93	0.79	0.94	0.87	0.93	0.91	0.96	0.95	0.93	0.93	0.86	0.89	0.9	0.88	0.93	0.98	0.89	0.9	0.89	0.84	0.88	0.89
chr11:61489417:61491674:-@chr11:61489153|61489186:61489035:-	A3SS	0.0137257	0.94	0.91	0.91	0.92	0.92	0.95	0.94	0.99	0.99	0.98	0.95	0.97	0.9	0.99	0.95	0.95	0.99	0.96	0.99	0.97	0.9	0.92	0.97	0.92	0.93	0.94	0.98	0.95	0.93	0.89	0.89	0.89	0.91
chr11:61489417:61491674:-@chr11:61489160|61489186:61489035:-	A3SS	0.0439149	0.94	0.91	0.84	0.86	0.89	0.93	0.92	0.96	0.97	0.96	0.93	0.94	0.82	0.97	0.95	0.94	0.99	0.9	0.98	0.96	0.84	0.89	0.96	0.86	0.93	0.92	0.97	0.92	0.93	0.8	0.83	0.89	0.86
chr11:62090952:62091058:-@chr11:62090854:62090885:-	RI	0.0385982	0.39	0.56	0.47	0.52	0.46	0.59	0.4	0.52	0.4	0.45	0.53	0.55	0.53	0.56	0.45	0.37	0.43	0.51	0.51	0.38	0.53	0.53	0.56	0.6	0.36	0.62	0.48	0.6	0.42	0.62	0.62	0.56	0.43
chr11:62091576:62091447|62091443:-@chr11:62090854:62091058:-	A5SS	0.0465655	0.51	0.4	0.43	0.5	0.33	0.21	0.3	0.39	0.16	0.34	0.23	0.36	0.32	0.32	0.34	0.18	0.28	0.74	0.18	0.41	0.59	0.23	0.27	0.65	0.42	0.29	0.62	0.26	0.49	0.63	0.47	0.61	0.64
chr11:62379181:62379264:-@chr11:62378936:62378986:-	RI	0.0429238	NA	NA	NA	NA	0.65	0.51	0.56	NA	0.66	NA	0.47	0.57	0.41	NA	NA	0.6	0.53	NA	NA	NA	NA	0.35	0.54	0.58	NA	0.51	NA	0.41	0.3	0.39	NA	NA	0.47
chr11:63195684:63196021:-@chr11:63195338:63195459:-@chr11:63183086:63183300:-	SE	0.0197149	NA	NA	0.68	0.82	0.85	0.83	0.81	NA	0.88	0.75	0.93	0.85	0.79	0.85	NA	0.85	0.84	NA	0.68	0.8	0.72	0.88	0.79	0.5	0.61	0.77	0.68	0.82	0.76	0.89	0.63	0.67	0.54
chr11:63228899:63228955:+@chr11:63274039|63274123:63274246:+	A3SS	0.0116316	NA	NA	NA	NA	NA	0.47	NA	NA	0.51	0.53	0.56	0.52	NA	0.49	NA	0.45	NA	0.44	0.51	NA	NA	0.42	0.51	NA	NA	0.34	0.4	0.48	0.45	0.32	NA	0.46	0.39
chr11:63469888:63469983:+@chr11:63470999:63471051:+@chr11:63476286:63476381:+	SE	0.0139219	NA	NA	NA	0.64	NA	0.58	NA	NA	NA	NA	0.68	NA	NA	0.53	NA	NA	NA	NA	0.5	0.5	NA	0.48	0.43	NA	NA	0.38	NA	0.45	NA	NA	NA	NA	NA
chr11:63520578:63520705|63520696:+@chr11:63520905:63520989:+	A5SS	0.0296972	NA	NA	0.59	NA	0.63	NA	NA	0.45	NA	0.61	0.74	0.69	NA	0.45	NA	0.59	NA	NA	0.51	0.49	NA	0.78	0.71	NA	NA	0.74	NA	0.6	0.66	NA	0.64	NA	NA
chr11:63730726:63730862:+@chr11:63731399|63731402:63731572:+	A3SS	0.0461345	NA	NA	NA	0.69	0.76	0.66	0.82	0.63	0.73	NA	0.73	0.63	0.62	0.78	NA	0.66	0.84	NA	NA	0.54	NA	0.74	0.86	0.47	NA	0.51	0.47	0.56	0.52	NA	0.55	NA	NA
chr11:63749547:63749628:-@chr11:63748849:63749018:-	RI	0.0238763	NA	NA	NA	0.54	0.61	0.63	0.69	0.27	0.22	0.18	0.41	0.61	0.6	0.03	NA	0.17	0.58	NA	0.45	0.26	NA	0.56	0.66	NA	NA	0.68	0.64	0.59	NA	0.63	NA	NA	NA
chr11:6457778:6458229:-@chr11:6457016|6457039:6456946:-	A3SS	0.0171353	0.66	NA	0.51	NA	0.37	0.4	0.64	NA	0.51	0.48	0.49	NA	0.51	0.43	NA	0.48	NA	0.46	NA	0.48	NA	0.65	0.54	NA	NA	0.63	NA	0.53	NA	NA	0.51	NA	0.65
chr11:6457778:6458229:-@chr11:6457016|6457260:6456946:-	A3SS	0.0347948	0.25	0.67	0.59	NA	0.59	0.26	0.54	0.53	0.47	0.53	0.48	0.69	0.31	0.54	NA	0.57	0.69	0.44	NA	0.43	NA	0.39	0.64	0.62	NA	0.72	0.56	0.7	0.84	NA	0.6	0.6	0.48
chr11:6459037:6459284:-@chr11:6458229|6458269:6458129:-	A3SS	0.0380377	NA	0.76	0.62	0.78	0.95	0.91	0.87	0.79	0.51	NA	0.98	0.58	0.77	NA	0.83	0.94	0.71	NA	0.75	0.59	NA	0.97	0.88	0.86	NA	0.97	0.89	0.96	0.83	0.78	0.84	0.83	0.81
chr11:64656779:64656827:-@chr11:64656295:64656398:-	RI	0.0432826	NA	NA	NA	0.51	0.48	0.52	0.57	NA	NA	NA	0.45	0.58	0.51	0.45	NA	0.47	0.65	NA	0.51	0.49	NA	0.6	0.55	NA	NA	0.55	0.54	0.61	0.54	NA	NA	NA	NA
chr11:6475391:6475473:+@chr11:6476529:6476767:+	RI	0.0158929	NA	NA	NA	0.49	0.73	0.64	0.49	0.46	0.65	NA	0.72	0.62	0.68	0.74	NA	0.52	0.5	NA	0.64	0.68	NA	0.76	0.75	NA	NA	0.74	NA	0.69	0.66	NA	NA	NA	NA
chr11:64903423:64903608:-@chr11:64901380:64901470:-@chr11:64900865:64901123:-	SE	0.0328172	NA	0.4	0.31	0.42	0.39	0.28	0.37	0.43	0.63	0.34	0.25	0.66	0.22	0.63	0.3	0.62	0.69	0.53	0.4	0.05	NA	0.25	0.15	NA	NA	0.16	NA	0.29	0.39	NA	NA	NA	NA
chr11:65062014:65062229:+@chr11:65062317:65062371:+@chr11:65062489:65062758:+	SE	0.0211596	0.74	0.78	0.81	0.72	0.7	0.6	0.79	0.75	0.84	0.93	0.73	0.84	0.73	0.86	0.84	0.73	0.87	NA	0.85	0.8	0.41	0.72	0.8	0.43	0.74	0.79	0.91	0.75	0.48	0.58	0.78	0.56	0.45
chr11:65182765:65182869:-@chr11:65182364|65182546:65182334:-	A3SS	0.0497467	NA	NA	0.52	0.43	0.48	0.46	0.39	0.47	0.61	0.53	0.56	0.52	0.57	0.66	0.43	0.54	0.39	NA	0.47	0.49	NA	0.48	0.54	0.57	NA	0.43	0.52	0.61	0.57	0.57	0.61	0.57	0.56
chr11:65236853:65237105:+@chr11:65237395:65237550:+@chr11:65237640:65237714:+	SE	0.0156639	NA	NA	NA	0.81	0.7	0.83	0.85	0.63	0.81	0.8	0.77	0.75	0.75	0.79	NA	0.79	0.77	NA	0.79	0.68	0.66	0.87	0.74	0.51	NA	0.58	0.62	0.84	0.7	0.3	NA	0.59	0.52
chr11:65237821:65237895:+@chr11:65238542|65238707:65238790:+	A3SS	0.0384683	NA	NA	0.43	0.55	0.43	0.69	0.48	0.54	0.49	0.44	0.61	0.61	0.55	0.54	NA	0.48	0.48	NA	0.46	0.48	0.58	0.39	0.45	0.35	NA	0.38	0.31	0.34	0.57	0.4	0.42	0.51	0.56
chr11:65865014:65865093:-@chr11:65864821:65864917:-	RI	0.042197	NA	NA	NA	NA	0.4	0.58	0.46	NA	NA	0.48	0.42	NA	NA	NA	NA	0.39	NA	NA	NA	NA	NA	0.57	NA	NA	NA	0.61	0.65	0.57	NA	NA	NA	NA	NA
chr11:65892584:65893579:-@chr11:65891916|65891933:65891819:-	A3SS	0.0121876	NA	NA	NA	0.51	0.67	0.55	0.69	NA	0.51	0.74	0.84	0.51	NA	0.5	NA	0.45	0.46	NA	0.56	0.57	NA	0.56	0.54	NA	NA	0.43	0.43	0.46	NA	0.33	NA	0.43	0.47
chr11:65895610:65896312:-@chr11:65895291:65895372:-@chr11:65892584:65893579:-	SE	0.046166	NA	NA	NA	0.56	0.69	0.81	0.75	NA	0.7	0.78	0.66	0.68	0.47	0.82	NA	0.68	0.68	NA	0.54	0.56	NA	0.73	0.52	0.66	NA	0.29	0.44	0.79	0.45	0.62	NA	0.42	0.62
chr11:65992175:65992327:+@chr11:65992880:65992951:+@chr11:65995289:65995418:+	SE	0.049746	NA	NA	NA	NA	NA	NA	0.37	NA	NA	NA	0.37	NA	NA	NA	NA	0.38	NA	NA	NA	NA	NA	0.6	0.7	NA	NA	0.78	NA	0.63	NA	NA	NA	NA	NA
chr11:66140484:66141104:+@chr11:66148261:66148994:+@chr11:66163747:66165239:+	SE	0.0296395	0.54	0.67	0.54	0.4	0.71	0.77	0.78	0.77	0.9	0.93	0.8	0.93	0.4	0.78	0.72	0.7	0.96	0.59	0.89	0.94	0.69	0.49	0.56	0.5	0.64	0.65	0.84	0.66	0.33	0.79	0.71	0.51	0.63
chr11:66324688:66324743:+@chr11:66325078:66325244:+@chr11:66328042:66328237:+	SE	0.019278	NA	0.34	NA	0.53	0.51	0.55	0.36	0.58	0.66	0.6	0.62	0.59	0.56	0.46	0.54	0.58	0.65	NA	0.6	0.66	NA	0.74	0.4	NA	0.66	0.75	NA	0.62	0.63	0.69	0.66	0.69	0.46
chr11:66808894:66809030:+@chr11:66809125:66809235:+	RI	0.0103234	NA	0.35	0.72	0.58	0.49	0.49	0.52	0.77	0.7	0.59	0.5	0.47	0.58	0.77	0.63	0.57	0.71	NA	0.46	0.68	NA	0.57	0.76	0.73	NA	0.75	0.79	0.75	0.78	0.69	0.73	0.74	0.49
chr11:66877124:66877035|66876738:-@chr11:66874843:66876066:-	A5SS	0.0056577	0.64	0.5	0.59	0.47	0.7	0.74	0.67	0.46	0.73	0.63	0.67	0.75	0.5	0.74	0.81	0.69	0.86	0.73	0.59	0.86	0.6	0.48	0.74	0.45	0.33	0.64	0.35	0.62	0.59	0.54	0.43	0.19	0.67
chr11:66958424:66958531:+@chr11:66958629:66958741:+@chr11:66959036:66959455:+	SE	0.0490536	0.63	0.51	0.79	0.7	0.91	0.89	0.82	0.78	0.8	0.83	0.89	0.74	0.49	0.85	0.59	0.87	0.84	NA	0.9	0.87	0.73	0.81	0.86	0.59	NA	0.84	0.63	0.74	0.76	0.57	0.69	0.6	0.46
chr11:67021278:67021483:-@chr11:67020225:67020392:-	RI	0.0234995	NA	NA	NA	0.23	0.07	0.13	0.1	0.3	0.16	0.02	0.14	0.2	0.33	0.11	0.21	0.07	0.23	0.43	0.39	0.03	NA	0.13	0.18	NA	NA	0.41	0.24	0.17	0.33	0.62	0.58	0.46	NA
chr11:67021278:67021483:-@chr11:67020225:67020395:-	RI	0.025105	NA	NA	NA	0.19	0.06	0.1	0.1	0.39	0.15	0.02	0.12	0.21	0.28	0.1	0.18	0.05	0.21	0.38	0.28	0.03	NA	0.14	0.19	NA	NA	0.37	0.29	0.13	0.26	0.59	0.47	0.37	NA
chr11:67021278:67021483:-@chr11:67020392|67020395:67020225:-	A3SS	0.0103263	NA	NA	NA	0.69	0.74	0.54	0.73	0.44	0.65	0.76	0.84	0.31	0.39	0.83	0.63	0.76	0.68	0.66	0.72	0.69	NA	0.42	0.41	NA	NA	0.45	0.54	0.67	0.35	NA	0.47	0.43	NA
chr11:67110151:67110279|67110258:+@chr11:67110436:67110710:+	A5SS	0.0281401	0.19	0.07	0.09	0.06	0.15	0.18	0.24	0.69	0.4	0.45	0.21	0.4	0.06	0.41	0.25	0.2	0.36	0.28	0.37	0.35	0.06	0.18	0.27	0.1	0.06	0.27	0.66	0.18	0.04	0.05	0.12	0.14	0.12
chr11:67573124:67573337:+@chr11:67573706:67573831:+	RI	0.0486098	0.22	NA	0.49	0.36	0.2	0.36	0.2	0.31	0.53	0.17	0.18	0.28	0.49	0.44	0.3	0.28	0.28	0.39	0.22	0.14	NA	0.43	0.32	0.38	NA	0.28	0.62	0.32	0.65	0.31	0.4	NA	NA
chr11:688869:688888:+@chr11:690142:690235:+	RI	0.0390475	NA	NA	NA	0.44	0.34	0.56	0.37	0.52	0.41	NA	0.49	0.45	0.43	0.37	NA	0.71	NA	NA	0.46	NA	NA	0.45	0.51	NA	NA	0.59	0.58	0.55	0.58	NA	NA	NA	NA
chr11:696113:696288:+@chr11:696596:696801:+@chr11:698575:698643:+@chr11:699330:699451:+	MXE	0.0204406	0.45	0.34	0.13	0.24	0.07	0.12	0.08	0.08	0.65	0.53	0.09	0.61	0.39	0.86	0.06	0.1	0.42	0.15	0.68	0.72	NA	0.05	0.03	0.6	0.29	0.07	0.04	0.07	0.26	0.17	0.1	0.08	0.09
chr11:696113:696288:+@chr11:696596:696801:+@chr11:699330:699451:+	SE	0.00461872	0.65	0.58	0.39	0.61	0.46	0.68	0.5	0.41	0.53	0.67	0.36	0.54	NA	0.78	NA	0.65	0.69	NA	0.73	0.67	NA	0.22	0.17	0.48	NA	0.4	0.18	0.2	0.65	0.58	NA	NA	0.32
chr11:69871943:69872174:+@chr11:69873677:69873793:+@chr11:69874748:69874777:+	SE	0.0447678	NA	NA	NA	NA	0.67	0.54	0.58	0.37	0.45	0.51	0.58	NA	0.65	NA	NA	0.36	NA	0.61	0.54	0.67	NA	0.43	NA	NA	NA	0.34	NA	0.43	NA	0.48	NA	NA	NA
chr11:69901784:69901949:+@chr11:69905842:69905912:+@chr11:69906757:69908511:+	SE	0.0120876	0.76	0.88	0.68	0.86	0.71	0.72	0.79	0.64	0.9	0.92	0.87	0.91	0.76	0.87	0.81	0.85	0.79	0.79	0.77	0.87	0.37	0.63	0.7	0.73	0.64	0.85	0.49	0.72	0.72	0.89	0.64	0.86	0.77
chr11:71349444:71349585:+@chr11:71371501:71371609:+@chr11:71375698:71375805:+	SE	0.0167163	0.7	0.48	0.53	0.56	NA	0.63	0.55	NA	0.55	0.68	0.75	0.56	0.5	0.76	NA	0.52	NA	NA	NA	0.64	NA	0.35	0.41	0.5	NA	0.67	NA	0.56	0.51	0.22	0.45	NA	NA
chr11:71458536:71458787:-@chr11:71456799:71456925:-@chr11:71451283:71451380:-@chr11:71424596:71424669:-	MXE	0.0379695	NA	NA	0.74	0.73	0.75	0.4	0.65	NA	0.34	0.72	0.82	NA	NA	0.66	0.66	0.65	0.81	NA	NA	NA	NA	0.6	0.56	NA	0.63	NA	NA	0.66	NA	0.62	NA	0.59	0.61
chr11:72291236:72291331:-@chr11:72288950:72289021:-@chr11:72278522:72278638:-	SE	0.0198291	NA	NA	NA	0.74	0.58	0.63	0.64	0.55	0.65	NA	0.7	0.58	0.62	0.66	0.49	0.43	0.72	NA	0.52	0.63	NA	0.58	0.54	0.49	NA	0.45	NA	0.59	0.62	NA	0.51	0.45	0.5
chr11:73287839:73287952|73287937:+@chr11:73288963:73289113:+	A5SS	0.015873	NA	NA	NA	NA	NA	NA	0.71	NA	NA	0.78	0.77	NA	NA	0.73	NA	NA	NA	NA	NA	NA	NA	0.63	0.68	NA	NA	0.62	NA	0.67	0.59	NA	NA	NA	NA
chr11:74294932:74295149:-@chr11:74251674:74251714:-@chr11:74239781:74239896:-@chr11:74235753:74237155:-	MXE	0.0269631	0.44	0.52	0.46	0.37	0.71	0.52	0.61	NA	0.84	0.86	0.87	0.6	0.5	0.48	0.41	0.68	0.84	0.62	0.57	0.62	0.56	0.37	0.77	0.39	0.5	0.4	0.56	0.44	0.53	0.57	NA	0.32	0.38
chr11:74793364:74793564|74793560:+@chr11:74794306:74794532:+	A5SS	0.0140465	0.92	0.88	0.91	0.9	0.87	0.87	0.86	0.5	0.7	0.78	0.85	0.77	0.86	0.76	0.83	0.82	0.67	0.72	0.63	0.71	0.87	0.85	0.85	0.87	0.84	0.88	0.77	0.87	0.9	0.89	0.92	0.93	0.94
chr11:74950818:74951012:+@chr11:74952420:74952463:+@chr11:74955009:74955664:+	SE	0.0190418	0.32	NA	0.43	0.49	0.37	0.66	0.35	0.35	0.55	0.52	0.37	0.5	0.61	0.46	0.46	0.7	0.38	NA	0.45	0.69	0.43	0.29	0.44	0.37	0.27	0.35	0.53	0.31	0.4	0.29	0.41	0.55	0.15
chr11:76455578:76455789:+@chr11:76461685:76461831:+@chr11:76473546:76473745:+	SE	0.0442245	0.21	0.51	0.24	0.11	0.13	0.24	0.22	0.53	0.38	0.34	0.13	0.33	0.04	0.37	NA	0.1	0.24	0.46	0.38	0.81	NA	0.16	0.16	0.14	0.22	0.13	0.56	0.13	0.22	0.1	0.2	0.08	0.11
chr11:77008388:77008299|77008295:-@chr11:77003271:77005388:-	A5SS	0.0310209	0.25	0.45	0.13	0.15	0.47	0.07	0.19	0.66	0.75	0.48	0.38	0.45	0.13	0.79	0.19	0.23	0.48	0.51	0.63	0.51	0.19	0.04	0.27	0.3	0.31	0.44	0.4	0.12	0.14	0.06	0.18	0.28	0.33
chr11:77011366:77011193|77011189:-@chr11:77008177:77008388:-	A5SS	0.0270557	0.51	0.67	0.54	0.26	0.33	0.42	0.31	NA	0.55	0.25	0.37	0.32	0.49	0.56	0.5	0.36	0.43	0.57	0.66	0.29	0.46	0.64	0.6	0.34	0.61	0.48	NA	0.4	0.67	0.69	0.73	0.62	0.49
chr11:7973377:7973494|7973490:+@chr11:7974068:7976283:+	A5SS	0.0269337	0.43	0.46	0.71	0.79	0.21	0.33	0.31	0.66	0.87	0.3	0.31	0.87	0.85	0.91	0.71	0.9	0.9	0.4	0.91	0.89	0.51	0.25	0.39	0.74	0.62	0.38	0.86	0.24	0.25	0.27	0.63	0.43	0.25
chr11:813694:813855:+@chr11:813998:814130:+	RI	0.0133483	NA	0.6	0.08	0.14	0.13	0.23	0.12	0.49	0.16	0.18	0.22	0.14	0.23	0.21	NA	0.38	0.22	0.35	0.15	0.3	NA	0.4	0.5	NA	NA	0.18	0.51	0.21	NA	0.46	NA	0.59	0.64
chr11:82460381:82460612:-@chr11:82448767:82448868:-@chr11:82385914:82386014:-	SE	0.0230601	NA	NA	0.61	0.65	0.67	0.69	NA	0.48	0.38	0.56	0.61	0.67	NA	0.78	NA	0.67	0.53	NA	0.63	0.6	NA	0.44	0.36	0.54	NA	0.58	NA	NA	0.57	NA	NA	0.5	NA
chr11:839817:840367:+@chr11:852550:854352:+@chr11:854437:855825:+	SE	0.0323778	NA	0.54	0.51	0.57	0.73	0.44	0.64	0.58	0.73	0.5	0.74	0.45	0.64	0.34	0.67	0.5	0.45	0.7	0.37	NA	NA	0.7	0.7	0.69	NA	0.64	0.7	0.79	0.8	0.53	0.49	0.67	0.71
chr11:85017277:85017380:+@chr11:85019837:85020008:+@chr11:85020379:85020500:+	SE	0.0346979	0.46	0.39	0.34	0.62	0.4	0.51	0.36	NA	0.39	0.18	0.2	0.28	0.47	0.47	0.69	0.65	0.17	0.46	0.53	0.71	0.73	0.55	0.36	0.4	0.57	0.7	0.52	0.81	0.34	0.56	0.5	0.7	0.53
chr11:85369820:85369919:-@chr11:85363399:85363503:-@chr11:85345333:85347751:-	SE	0.0419443	0.91	0.83	0.92	0.94	0.91	0.91	0.94	0.67	0.97	0.91	0.92	0.98	0.76	0.92	0.81	0.88	0.85	0.85	0.88	0.97	0.79	0.9	0.9	0.84	0.88	0.92	0.73	0.9	0.8	0.9	0.88	0.79	0.84
chr11:855513:855614:+@chr11:855694:855825:+	RI	0.00696464	NA	NA	NA	0.65	0.62	NA	0.65	NA	NA	0.72	0.72	NA	NA	NA	NA	0.69	0.67	NA	NA	NA	NA	0.45	0.62	NA	NA	0.5	0.45	0.55	NA	NA	NA	NA	NA
chr11:8661325:8661392|8661388:+@chr11:8662129:8663015:+	A5SS	0.0405516	0.37	0.54	0.65	0.51	0.52	0.42	0.38	0.41	0.55	0.53	0.39	0.49	0.49	0.53	0.41	0.41	0.47	0.53	0.45	0.43	0.68	0.44	0.44	0.57	0.61	0.51	0.71	0.45	0.59	0.53	0.54	0.58	0.36
chr11:8680695:8681734:-@chr11:8677980:8678135:-@chr11:8677336:8677513:-	SE	0.0103526	NA	NA	0.23	0.24	0.44	0.16	0.14	0.57	0.29	0.5	0.23	0.35	0.23	0.32	NA	0.25	0.14	0.37	0.2	0.22	NA	0.24	0.54	NA	0.31	0.55	0.47	0.51	0.44	0.3	NA	0.36	0.5
chr11:87685370:87685266|87685200:-@chr11:87681979:87682134:-	A5SS	0.0277717	0.78	0.79	0.88	0.92	0.9	0.81	0.94	0.72	0.93	0.88	0.88	0.87	0.83	0.9	0.83	0.91	0.9	0.6	0.7	0.88	0.79	0.86	0.83	0.53	0.65	0.89	0.79	0.83	0.8	0.88	0.69	0.78	0.79
chr11:889340:889431:-@chr11:883423:883519:-@chr11:874064:874169:-	SE	0.0457571	NA	NA	NA	0.51	0.6	0.55	0.56	0.48	NA	0.56	0.63	0.66	0.54	0.53	NA	0.58	NA	NA	NA	NA	NA	0.44	0.53	NA	NA	0.52	0.46	0.59	NA	0.53	NA	0.49	NA
chr11:894706:894859:-@chr11:893656:893753:-@chr11:892962:893111:-	SE	0.0425827	NA	NA	NA	0.59	0.27	0.37	0.49	0.67	0.29	0.53	0.42	0.49	0.54	0.58	NA	0.53	0.6	NA	0.58	0.39	0.84	0.6	0.51	0.49	NA	0.52	0.71	0.61	0.48	0.75	0.56	0.75	0.54
chr11:9121526:9121608:-@chr11:9120845:9120968:-	RI	0.0268436	NA	NA	NA	NA	NA	NA	0.24	NA	NA	NA	0.39	NA	NA	NA	NA	0.48	0.51	NA	NA	NA	NA	0.54	0.51	NA	NA	0.53	NA	0.56	0.63	NA	NA	NA	NA
chr11:93114415:93114542:+@chr11:93120116:93120262:+@chr11:93123160:93123258:+	SE	0.0235543	0.47	0.63	0.49	0.71	0.76	0.8	0.77	NA	0.7	0.52	0.82	0.65	0.58	0.71	0.58	0.61	0.57	NA	0.66	0.58	0.59	0.79	0.62	0.48	0.37	0.61	0.57	0.6	0.57	0.54	0.46	0.47	0.53
chr11:93869418:93869891|93869765:+@chr11:93870885:93872774:+	A5SS	0.038925	0.54	0.49	0.42	0.69	0.58	0.58	0.66	0.61	0.47	0.26	0.39	0.48	0.37	0.57	0.2	0.45	0.7	0.44	0.21	0.3	0.37	0.3	0.52	0.76	0.66	0.6	0.65	0.61	0.55	0.51	0.7	0.69	0.61
chr11:94346477:94346880:+@chr11:94348466:94348560:+@chr11:94369836:94372330:+	SE	0.0441256	NA	NA	NA	0.31	0.42	0.55	NA	NA	NA	NA	0.56	NA	NA	NA	NA	0.53	NA	NA	NA	NA	NA	0.62	0.68	NA	NA	0.83	NA	0.56	0.65	0.5	NA	NA	NA
chr11:95162708:95163555:+@chr11:95168328:95168371:+@chr11:95172044:95172200:+	SE	0.0398584	0.38	0.22	0.19	0.54	0.58	0.29	0.49	0.41	0.34	0.59	0.42	0.31	0.31	0.56	0.41	0.38	0.51	NA	0.44	0.32	0.54	0.39	0.41	0.41	0.24	0.69	0.83	0.57	0.43	0.48	0.47	0.65	0.61
chr11:95194683:95194790:+@chr11:95195311:95195388:+@chr11:95200598:95200839:+	SE	0.0378342	0.61	0.83	0.65	0.69	0.78	0.85	0.84	NA	0.69	0.72	0.72	0.67	0.8	0.34	0.4	0.58	0.67	NA	0.51	0.91	0.59	0.61	0.73	0.69	0.56	0.4	0.34	0.73	0.64	0.57	NA	0.6	0.29
chr11:9672269:9672409:+@chr11:9681519:9681571:+@chr11:9691589:9691762:+	SE	0.0190905	0.58	0.46	0.66	0.71	0.85	0.37	0.77	0.62	0.72	NA	0.8	0.85	0.68	0.52	0.85	0.88	0.77	0.73	0.7	0.85	0.7	0.61	0.56	0.58	0.27	0.72	0.63	0.69	0.55	0.33	0.67	0.37	0.78
chr12:100634637:100634721:+@chr12:100635146:100635303:+@chr12:100638032:100639967:+	SE	0.0372609	0.78	0.43	0.54	0.53	0.46	0.77	0.3	0.56	0.6	0.29	0.55	0.81	0.56	0.37	0.7	0.59	0.88	0.54	0.86	0.73	0.2	0.47	0.36	0.33	0.4	0.3	0.44	0.54	0.32	0.66	0.65	0.45	0.78
chr12:100644203:100644406|100644313:+@chr12:100646810:100647285:+	A5SS	0.0461811	0.84	0.68	0.71	0.85	0.73	0.78	0.76	0.84	0.8	0.86	0.81	0.71	0.59	0.79	0.85	0.62	0.67	0.79	0.8	0.92	0.67	0.73	0.8	0.69	0.45	0.79	0.62	0.78	0.81	0.71	0.35	0.64	0.79
chr12:10171711:10171613|10170437:-@chr12:10168407:10169314:-	A5SS	0.0266458	0.65	0.72	0.65	0.69	0.61	0.58	0.61	0.55	0.34	NA	0.48	0.5	0.64	0.69	0.65	NA	0.64	0.54	NA	0.71	0.69	0.7	0.55	0.51	NA	0.69	NA	0.78	0.8	0.8	0.73	0.58	0.84
chr12:103044152:103044022|103044017:-@chr12:103041134:103041331:-	A5SS	0.0473087	NA	0.62	NA	0.58	0.71	0.56	0.69	NA	0.69	0.22	0.74	0.51	0.66	0.8	NA	0.79	0.89	NA	0.58	0.56	0.42	0.74	0.34	0.48	0.46	0.62	0.35	0.8	0.66	0.57	0.56	0.54	0.47
chr12:104070251:104070359:+@chr12:104073018:104073116:+@chr12:104074634:104074700:+	SE	0.0331681	NA	NA	NA	NA	NA	NA	NA	NA	0.61	NA	0.47	0.44	NA	0.47	0.55	0.55	NA	NA	0.57	0.57	NA	0.37	0.43	NA	NA	0.52	0.47	0.4	0.55	0.54	0.46	0.44	NA
chr12:10641909:10642075:-@chr12:10639557:10639793:-@chr12:10637647:10637871:-	SE	0.0128121	NA	NA	NA	0.69	0.56	0.69	NA	NA	NA	NA	0.6	NA	0.67	NA	NA	0.65	NA	NA	0.51	0.65	NA	0.7	NA	NA	NA	0.7	NA	0.75	0.69	NA	NA	NA	NA
chr12:10747917:10748014:-@chr12:10745826:10746000:-	RI	0.0351177	NA	NA	0.12	0.17	0.04	0.02	0.03	0.29	0.03	0.05	0.02	0.01	0.06	0.28	0.11	0.01	0.02	0.69	0.04	0.01	0.13	0.1	0.02	0.57	0.58	0.04	0.13	0.03	0.32	0.07	0.32	0.11	0.61
chr12:10748014:10747921|10747917:-@chr12:10745826:10745997:-	A5SS	0.0152458	NA	NA	0.53	0.56	0.81	0.73	0.82	0.69	0.7	NA	0.88	0.79	0.58	0.63	0.52	0.77	0.6	NA	0.78	0.82	0.51	0.69	0.6	NA	NA	0.74	0.58	0.68	0.47	0.47	0.4	0.59	NA
chr12:108014695:108015673:-@chr12:108012197:108012395:-@chr12:108010376:108010700:-	SE	0.00238712	NA	0.63	0.85	0.81	0.82	0.59	0.75	0.59	0.81	0.62	0.76	0.8	0.5	0.74	NA	0.71	0.75	NA	0.58	0.82	0.63	0.61	0.7	0.46	0.44	0.81	0.44	0.53	0.6	0.55	0.56	0.51	0.52
chr12:108180456:108180552:+@chr12:108181148|108181161:108181296:+	A3SS	0.0324764	NA	NA	NA	NA	NA	NA	0.69	NA	NA	0.8	0.68	0.72	NA	0.56	NA	0.61	NA	NA	NA	NA	NA	0.42	0.61	NA	NA	0.5	NA	0.45	NA	NA	NA	NA	NA
chr12:108372162:108373781:-@chr12:108370841:108372161:-	TandemUTR	0.0353966	0.79	0.62	0.7	0.78	0.89	0.88	0.94	0.43	0.62	0.81	0.81	0.8	0.88	0.27	0.82	0.83	0.41	0.78	0.7	0.54	0.89	0.87	0.86	0.89	0.84	0.86	0.81	0.88	0.79	0.84	0.67	0.75	0.84
chr12:108456970:108457211:+@chr12:108457212:108458889:+	TandemUTR	0.0484251	0.37	0.35	0.53	0.59	0.5	0.62	0.51	0.62	0.5	0.49	0.6	0.57	0.54	0.56	0.57	0.46	0.22	0.49	0.59	0.61	0.65	0.68	0.38	0.54	0.63	0.63	0.59	0.72	0.58	0.44	0.58	0.61	0.5
chr12:109421723:109424313:-@chr12:109421008:109421044:-@chr12:109418200:109419190:-	SE	0.0337723	0.49	0.39	0.55	0.33	0.33	0.41	0.56	0.42	0.51	0.34	0.48	0.41	0.57	0.36	0.48	0.42	0.46	0.48	0.6	0.45	0.49	0.56	0.49	0.46	0.48	0.45	0.5	0.4	0.53	0.58	0.54	0.58	0.58
chr12:109536262:109536590:+@chr12:109542024:109542144:+@chr12:109548550:109548680:+	SE	0.000748989	NA	NA	NA	0.53	0.64	0.36	0.63	0.43	NA	NA	0.65	0.59	0.55	NA	NA	0.38	0.61	NA	NA	NA	NA	0.7	0.78	NA	NA	0.72	0.68	0.69	0.78	0.69	NA	NA	NA
chr12:10974528:10974946:+@chr12:10976092:10977668:+	RI	0.0224685	NA	NA	NA	0.81	0.59	NA	0.56	0.38	0.44	NA	0.61	0.34	0.84	0.52	NA	0.5	0.66	NA	0.29	0.81	NA	0.84	0.75	NA	NA	0.8	NA	0.87	0.72	NA	NA	NA	0.68
chr12:110288444:110288319|110288300:-@chr12:110282722:110285650:-	A5SS	0.0134887	0.77	0.22	0.6	0.45	0.79	0.78	0.69	0.69	0.82	0.41	0.72	0.68	0.52	0.78	0.67	0.81	0.68	0.52	0.78	0.86	0.55	0.51	0.76	0.42	0.51	0.66	0.67	0.73	0.39	0.48	0.64	0.36	0.42
chr12:110407458:110407518:-@chr12:110404974:110405018:-@chr12:110392745:110392929:-	SE	0.0134972	NA	NA	0.51	0.46	NA	NA	0.39	NA	NA	NA	0.56	NA	0.39	NA	NA	NA	0.21	NA	NA	NA	NA	0.63	NA	NA	NA	NA	NA	0.6	NA	0.58	NA	0.61	0.54
chr12:110688729:110689283:+@chr12:110697792:110697907:+@chr12:110704105:110704209:+	SE	0.0201424	0.72	0.83	0.6	0.65	0.8	0.79	0.76	0.53	0.91	0.87	0.85	0.95	0.66	0.92	0.85	0.81	0.93	0.65	0.9	0.95	0.4	0.72	0.74	0.76	0.65	0.73	0.92	0.78	0.56	0.57	0.47	0.78	0.78
chr12:110720265:110720429:+@chr12:110722093:110722250:+@chr12:110726046:110726160:+	SE	0.0324142	0.6	0.74	0.84	0.87	0.8	0.79	0.84	0.72	0.88	0.89	0.9	0.94	0.66	0.92	0.82	0.91	0.9	0.65	0.89	0.87	0.81	0.81	0.83	0.65	0.58	0.85	0.72	0.82	0.84	0.74	0.79	0.71	0.78
chr12:110763514:110765192:-@chr12:110762520:110762664:-@chr12:110761955:110762190:-	SE	0.00787931	0.49	0.65	0.66	0.68	0.69	0.6	0.65	0.46	0.77	0.64	0.65	0.81	0.34	0.83	0.71	0.73	0.81	0.74	0.6	0.64	0.74	0.65	0.52	0.58	0.43	0.49	0.39	0.61	0.58	0.49	0.68	0.33	0.44
chr12:110789759:110789856:+@chr12:110792458:110792547:+@chr12:110793272:110793367:+	SE	0.00958559	0.39	0.48	0.41	0.47	0.4	NA	0.64	NA	NA	0.56	0.47	NA	0.46	0.35	NA	NA	NA	NA	0.45	0.48	0.53	0.62	0.52	NA	NA	0.52	NA	0.49	0.52	0.57	NA	0.54	NA
chr12:111839735:111839888:+@chr12:111841577|111841675:111842039:+	A3SS	0.0481431	0.72	0.72	0.41	0.59	0.95	0.87	0.79	0.74	0.94	0.74	0.94	0.74	0.51	0.79	0.55	0.63	0.84	0.82	0.79	0.76	0.58	0.86	0.51	0.67	0.58	0.5	0.69	0.73	0.79	0.5	0.68	0.79	0.59
chr12:116938891:116939080:+@chr12:116939878|116940183:116940241:+	A3SS	0.0281001	NA	NA	NA	0.5	0.45	0.47	NA	NA	NA	NA	0.55	NA	NA	NA	NA	0.51	0.44	NA	NA	NA	NA	0.51	0.54	NA	NA	0.56	NA	0.65	NA	0.58	NA	NA	NA
chr12:117025781:117026193:-@chr12:117025177:117025358:-@chr12:117017721:117018002:-	SE	0.0386309	0.56	0.43	0.61	0.64	0.29	0.35	0.35	0.21	0.62	0.64	0.38	0.67	0.38	0.63	0.78	0.31	0.29	0.69	0.57	0.65	0.36	0.32	0.32	0.51	0.46	0.57	0.32	0.38	0.2	0.32	0.32	0.33	0.42
chr12:119143809:119143944:-@chr12:119137746:119137847:-@chr12:119137289:119137603:-	SE	0.000329623	NA	0.26	0.24	0.53	0.46	0.37	0.61	0.26	0.16	0.17	0.37	0.32	0.31	0.33	0.33	0.57	0.31	0.35	0.23	0.15	0.37	0.47	0.59	0.6	0.51	0.4	0.65	0.58	0.41	0.63	0.61	0.41	0.51
chr12:119451126:119451347:-@chr12:119444400:119444549:-@chr12:119438749:119438974:-	SE	0.0242388	0.78	0.85	0.73	0.92	0.84	0.85	0.89	0.67	0.88	0.92	0.97	0.95	0.79	0.92	0.69	0.89	0.87	NA	0.76	0.83	0.65	0.82	0.74	0.87	0.82	0.88	0.66	0.86	0.77	0.69	NA	0.79	0.56
chr12:119482912:119483072:+@chr12:119485131:119485256:+@chr12:119485533:119485809:+	SE	0.0221069	0.76	0.63	0.89	0.87	0.8	0.89	0.9	0.9	0.88	0.91	0.86	0.9	0.57	0.97	0.86	0.94	0.88	0.79	0.9	0.87	0.82	0.82	0.78	0.82	0.58	0.87	0.95	0.84	0.8	0.77	0.73	0.81	0.65
chr12:119960960:119961427:-@chr12:119955647:119955929:-@chr12:119953628:119953803:-	SE	0.0132277	NA	NA	NA	0.96	0.97	0.95	0.89	NA	0.98	0.98	0.97	NA	0.83	NA	NA	0.77	0.85	NA	0.97	0.92	0.82	0.93	0.76	NA	0.79	0.87	0.73	0.85	NA	0.8	NA	0.89	0.94
chr12:120132042:120132484:+@chr12:120132860:120132868:+@chr12:120139320:120139467:+	SE	0.0463461	0.57	0.54	0.53	0.67	0.8	0.68	0.79	0.61	0.78	0.7	0.56	0.66	0.57	0.57	0.51	0.61	NA	NA	0.73	0.54	0.51	0.45	0.76	0.46	NA	0.8	0.41	0.28	NA	0.75	NA	0.46	0.42
chr12:120240687:120240794:-@chr12:120240590|120240610:120240463:-	A3SS	0.0354118	NA	0.66	NA	NA	0.72	0.54	0.57	NA	0.55	0.63	0.8	0.66	0.6	0.6	NA	0.51	0.72	NA	NA	0.73	NA	0.82	0.64	0.64	NA	0.81	NA	0.73	0.67	0.76	0.7	NA	NA
chr12:120352655:120352463|120352459:-@chr12:120351280:120352349:-	A5SS	0.0369753	0.49	0.56	0.39	0.51	0.45	0.49	0.49	0.6	0.63	0.72	0.49	0.47	0.77	0.49	0.62	0.56	0.69	0.46	0.58	0.59	0.37	0.57	0.48	0.5	0.58	0.64	0.55	0.42	0.4	0.39	0.42	0.48	0.44
chr12:120838600:120838933:+@chr12:120838934:120840152:+	TandemUTR	0.0162286	NA	0.06	0.01	0.04	0.01	0.01	0.03	0.43	0.01	0.01	0.01	0.01	0.03	0.01	0.03	0.03	0.02	NA	0.01	0.02	0.09	0.02	0.01	0.32	0.14	0.04	0.31	0.01	0.06	0.03	0.41	0.19	0.02
chr12:12095997:12096048:+@chr12:12112330:12112423:+@chr12:12116426:12116700:+@chr12:12123500:12123939:+	MXE	0.0309225	0.63	0.43	0.51	0.8	0.59	0.71	0.71	0.61	0.71	0.71	0.57	0.68	0.46	0.83	0.56	0.59	0.69	0.47	0.81	0.54	0.41	0.67	0.53	0.41	0.48	0.7	0.68	0.65	0.52	0.48	0.54	0.44	0.55
chr12:12095997:12096048:+@chr12:12116426:12116700:+@chr12:12121907:12122179:+@chr12:12123500:12123939:+	MXE	0.0465472	0.63	0.6	0.3	0.72	0.47	0.79	0.8	0.59	0.84	0.8	0.82	0.84	0.78	0.94	0.49	0.58	0.81	0.6	0.88	0.76	0.36	0.83	0.82	0.24	0.43	0.74	0.71	0.61	0.56	0.56	0.4	0.52	0.64
chr12:121577750:121577851:+@chr12:121580491|121580522:121580692:+	A3SS	0.0150493	NA	NA	NA	0.42	0.7	0.64	0.64	NA	NA	NA	0.88	0.39	0.75	NA	NA	0.7	0.7	NA	NA	NA	NA	0.93	0.85	NA	NA	0.76	NA	0.85	0.76	0.73	NA	NA	NA
chr12:122027371:122027463:+@chr12:122028825:122029069:+	RI	0.0198181	NA	0.67	0.37	0.35	0.46	0.44	0.25	0.37	0.41	0.15	0.34	0.16	0.66	0.34	NA	0.7	0.27	NA	0.41	0.1	NA	0.49	0.47	0.69	NA	0.79	0.27	0.42	0.48	0.51	0.63	0.38	0.55
chr12:122031222:122031799:+@chr12:122032071|122032095:122032379:+	A3SS	0.0406189	0.49	0.67	0.44	0.78	0.53	0.67	0.61	0.78	0.81	0.86	0.69	0.64	0.51	0.74	0.79	0.71	0.78	0.55	0.76	0.86	0.58	0.48	0.61	0.61	0.38	0.64	0.72	0.68	0.46	0.84	0.16	0.67	0.53
chr12:122031629:122031799|122031766:+@chr12:122032071:122032390:+	A5SS	0.0309787	0.65	0.62	0.63	0.79	0.68	0.68	0.63	0.76	0.93	0.87	0.75	0.81	0.73	0.87	0.45	0.77	0.9	0.43	0.78	0.9	0.57	0.64	0.75	0.5	0.51	0.82	0.62	0.78	0.54	0.66	0.14	0.73	0.63
chr12:122277963:122278116:-@chr12:122273538:122273627:-@chr12:122271872:122272223:-	SE	0.027217	NA	0.53	NA	0.49	0.63	0.56	0.66	NA	0.69	0.67	0.82	NA	0.77	0.71	NA	0.64	0.39	0.6	0.73	0.41	0.35	0.52	0.69	0.44	NA	0.49	0.56	0.75	0.35	0.37	NA	0.35	0.54
chr12:122656528:122656659:+@chr12:122657932|122659180:122659329:+	A3SS	0.0480605	NA	NA	NA	0.64	0.59	0.55	0.59	0.55	0.35	0.49	0.41	0.59	0.47	0.5	0.39	0.46	0.54	0.56	0.52	0.48	NA	0.16	0.64	0.64	0.59	0.71	0.4	0.67	0.63	0.26	0.59	0.67	0.61
chr12:123038543:123038638:+@chr12:123055378:123055435:+@chr12:123061881:123061941:+	SE	0.0247475	NA	NA	NA	0.48	0.47	0.57	0.5	0.66	0.43	0.54	0.53	NA	0.48	0.54	NA	0.61	0.53	NA	NA	0.61	NA	0.44	0.48	0.43	NA	0.49	0.51	0.43	0.41	NA	0.44	0.57	NA
chr12:123378132:123378046|123377908:-@chr12:123375798:123376869:-	A5SS	0.00607962	NA	NA	NA	0.79	0.56	0.73	0.67	0.36	0.8	0.82	0.8	0.75	0.74	0.84	0.79	0.39	0.89	NA	0.74	0.77	NA	0.49	0.67	0.43	NA	0.72	0.59	0.72	0.42	0.43	NA	0.63	0.45
chr12:124075929:124076043:+@chr12:124076044:124076302:+	TandemUTR	0.046408	0.41	0.47	0.42	0.38	0.5	0.49	0.5	NA	0.49	0.46	0.54	0.48	0.52	0.42	0.48	0.51	0.54	NA	0.65	0.37	0.55	0.36	0.53	0.47	NA	0.6	0.71	0.51	0.56	0.64	0.57	0.37	0.64
chr12:12564063:12564201:-@chr12:12544720:12544883:-@chr12:12531229:12531388:-	SE	0.0320254	0.56	0.52	0.74	0.74	0.81	0.85	0.59	NA	0.8	0.71	0.86	0.92	0.61	0.86	0.71	0.87	0.92	NA	0.88	0.85	0.6	0.88	0.79	0.75	0.47	0.84	0.58	0.72	0.58	0.59	0.71	0.23	0.54
chr12:131940090:131940763:-@chr12:131938393|131938396:131938277:-	A3SS	0.0117559	NA	NA	NA	0.5	0.65	0.55	0.6	0.43	0.59	0.41	0.83	0.48	NA	0.47	NA	0.36	0.6	NA	0.77	0.6	NA	0.75	0.7	NA	NA	0.78	0.74	0.71	0.72	NA	NA	NA	NA
chr12:15727094:15727173:-@chr12:15725427:15725503:-@chr12:15715057:15715124:-	SE	0.028595	0.52	0.48	NA	NA	0.46	0.45	0.46	NA	0.4	0.49	0.54	0.43	0.48	0.57	NA	0.53	NA	NA	0.43	0.38	NA	0.56	NA	NA	0.48	0.36	NA	0.58	NA	0.53	0.58	0.62	0.6
chr12:19556599:19556666:+@chr12:19558872:19558985:+@chr12:19562288:19566440:+	SE	0.0372291	0.56	0.5	0.78	0.92	0.85	0.79	0.72	0.55	0.67	0.71	0.85	0.56	0.56	0.36	0.73	0.75	0.33	0.43	0.42	0.53	0.45	0.93	0.84	0.5	0.66	0.91	0.58	0.84	0.8	0.87	0.78	0.81	0.8
chr12:21545966:21546149:+@chr12:21551086:21551177:+@chr12:21552584:21552762:+	SE	0.0270858	NA	0.77	0.76	0.82	0.72	0.8	0.85	NA	0.78	0.89	0.7	0.79	0.72	0.82	NA	0.6	0.74	NA	0.51	0.91	0.62	0.72	0.55	0.72	0.39	0.8	0.65	0.67	0.8	0.79	0.4	NA	0.7
chr12:2797533:2797704|2797682:+@chr12:2799513:2799652:+	A5SS	0.0462135	NA	NA	NA	0.71	0.68	0.71	0.8	0.68	0.77	0.86	0.91	0.8	0.51	0.75	NA	0.7	0.89	NA	NA	0.7	NA	0.73	0.74	NA	0.61	0.55	0.64	0.64	0.56	0.76	0.75	NA	0.66
chr12:2856627:2856709:+@chr12:2864589|2864690:2864961:+	A3SS	0.0338469	NA	NA	NA	0.6	0.52	0.32	0.51	0.42	NA	0.49	0.37	0.31	0.44	0.72	0.57	0.45	0.56	0.58	NA	0.45	NA	0.24	0.23	0.34	NA	0.52	0.4	0.38	0.45	0.45	0.36	NA	NA
chr12:32608338:32608490:+@chr12:32620467:32620650:+@chr12:32626161:32627154:+	SE	0.0118007	0.58	0.93	0.88	0.87	0.91	0.85	0.91	NA	0.88	0.93	0.95	0.93	0.81	0.83	0.82	0.92	0.86	0.71	0.82	0.95	0.78	0.84	0.51	0.82	0.53	0.86	0.8	0.92	0.8	0.86	0.78	0.88	0.66
chr12:41269534:41269835:-@chr12:41230277:41230398:-@chr12:41152454:41152633:-	SE	0.0441256	NA	NA	NA	NA	NA	0.28	0.3	NA	NA	NA	0.27	NA	NA	NA	NA	0.49	NA	0.38	NA	NA	NA	0.49	0.42	NA	NA	NA	0.48	0.53	NA	0.4	NA	0.64	NA
chr12:45043776:45043876:-@chr12:45043071:45043195:-@chr12:45042544:45042688:-	SE	0.0388596	0.66	0.8	0.71	0.91	0.7	0.76	0.84	0.65	0.65	0.63	0.86	0.82	0.57	0.69	0.63	0.58	0.72	0.51	0.83	0.59	0.62	0.81	0.77	0.61	0.55	0.77	0.67	0.57	0.64	0.57	0.55	0.56	0.57
chr12:4513584:4513796:-@chr12:4509296:4509477:-@chr12:4504911:4505010:-	SE	0.0411087	0.64	0.7	NA	0.76	0.81	0.79	0.79	NA	0.69	0.64	0.92	0.73	0.75	0.68	NA	0.81	0.75	NA	0.78	0.73	0.66	0.89	0.76	0.56	0.62	0.68	0.71	0.77	0.72	0.64	0.72	0.66	0.56
chr12:45890690:45890811:-@chr12:45889508|45889532:45889331:-	A3SS	0.049746	NA	NA	NA	0.55	NA	NA	NA	NA	NA	NA	0.48	0.24	NA	NA	NA	NA	0.55	NA	NA	NA	NA	0.7	0.63	NA	NA	NA	NA	NA	0.82	NA	NA	NA	NA
chr12:46648279:46648538:+@chr12:46648539:46648928:+	TandemUTR	0.0157664	0.77	0.52	0.67	0.68	0.3	0.43	0.57	0.66	0.71	0.28	0.44	0.43	0.66	0.41	0.56	0.35	0.18	0.55	0.36	0.45	0.74	0.56	0.49	0.63	0.73	0.64	0.51	0.37	0.69	0.67	0.8	0.73	0.75
chr12:46776393:46776477:-@chr12:46769213:46769343:-@chr12:46768603:46769010:-	SE	0.000433251	NA	NA	NA	0.62	0.68	NA	0.42	NA	0.67	NA	0.56	0.73	0.63	0.59	NA	0.59	0.88	NA	0.78	0.6	NA	0.4	0.38	0.29	NA	0.46	0.35	0.36	0.39	NA	NA	0.57	0.52
chr12:47359200:47359086|47359082:-@chr12:47351818:47352012:-	A5SS	0.0248713	NA	NA	0.52	NA	0.55	0.64	0.52	0.63	0.32	0.35	0.37	NA	NA	0.51	NA	0.39	0.61	NA	0.43	0.57	NA	0.61	0.61	NA	NA	0.59	NA	0.72	NA	NA	0.57	NA	0.63
chr12:47359705:47360123:-@chr12:47359082:47359200:-@chr12:47351818:47352012:-	SE	0.00416391	NA	0.68	0.7	0.5	0.5	0.64	0.83	0.68	0.77	0.56	0.71	0.74	0.73	0.81	NA	0.73	0.81	0.65	0.77	0.81	0.35	0.62	0.71	0.74	0.52	0.47	0.6	0.66	0.59	0.35	0.72	0.34	0.38
chr12:47359705:47360123:-@chr12:47359086:47359200:-@chr12:47351818:47352012:-	SE	0.0190539	NA	0.58	0.71	0.55	0.59	0.68	0.88	0.57	0.85	0.63	0.76	0.76	0.82	0.88	NA	0.72	0.83	0.73	0.62	0.81	0.42	0.72	0.76	0.67	0.63	0.48	0.72	0.7	0.69	0.45	0.62	0.43	0.5
chr12:47707853:47708070:-@chr12:47706232:47707372:-@chr12:47704860:47704996:-	SE	0.0209588	0.64	0.68	0.66	0.75	0.84	0.79	0.85	0.75	0.89	0.88	0.94	0.75	0.78	0.86	0.75	0.78	0.85	0.6	0.74	0.86	0.59	0.78	0.8	0.56	0.75	0.85	0.65	0.83	0.73	0.59	0.65	0.54	0.71
chr12:47724354:47724250|47724241:-@chr12:47723914:47724048:-	A5SS	0.0104639	NA	NA	NA	0.72	0.7	NA	0.78	NA	0.79	0.65	0.61	NA	NA	0.67	NA	NA	0.66	NA	0.74	NA	NA	NA	0.53	NA	NA	0.59	NA	0.61	0.61	NA	NA	NA	NA
chr12:47866661:47866883:-@chr12:47866494:47866508:-@chr12:47864829:47866040:-	SE	0.0295986	0.66	0.43	0.62	0.27	0.68	0.5	0.58	0.63	0.86	0.62	0.68	0.65	0.46	0.58	0.3	0.56	0.58	0.55	0.67	0.76	0.29	0.36	0.51	0.46	0.37	0.85	0.77	0.56	0.42	0.3	0.41	0.53	0.4
chr12:48439271:48439375|48439371:+@chr12:48441754:48443584:+	A5SS	0.0424284	0.46	0.32	0.35	0.53	0.49	0.42	0.31	0.53	0.39	0.45	0.3	0.25	0.46	0.25	0.45	0.43	0.35	0.52	0.3	0.47	0.72	0.34	0.4	0.49	0.32	0.55	0.4	0.46	0.62	0.41	0.55	0.52	0.53
chr12:48847151:48847554:-@chr12:48824253:48824414:-@chr12:48824002:48824107:-	SE	0.0291293	0.32	NA	0.28	0.42	0.13	0.3	0.26	0.44	0.43	0.35	0.07	0.26	0.36	NA	0.27	0.1	NA	0.38	NA	0.45	0.15	0.12	0.19	NA	NA	NA	0.22	0.09	0.26	0.19	NA	0.24	0.37
chr12:48847151:48847554:-@chr12:48825019|48825111:48824819:-	A3SS	0.0471573	NA	NA	NA	0.49	0.63	0.56	0.51	0.6	NA	NA	0.59	NA	NA	NA	NA	0.35	NA	NA	NA	NA	0.37	0.45	0.48	NA	NA	NA	0.43	0.47	NA	0.43	NA	NA	0.51
chr12:48847151:48847554:-@chr12:48828522:48828638:-@chr12:48827376:48827453:-@chr12:48824002:48824107:-	MXE	0.0203981	NA	NA	NA	0.47	0.51	0.49	0.47	0.68	NA	0.42	0.27	0.44	NA	NA	NA	0.52	0.32	NA	NA	0.41	0.23	0.39	0.37	0.45	NA	NA	0.31	0.38	0.3	0.28	NA	NA	0.44
chr12:49920394:49920512:+@chr12:49920922:49921167:+@chr12:49922381:49923982:+	SE	0.0386309	0.82	0.75	0.87	0.63	0.97	0.95	0.96	0.89	0.94	0.98	0.97	0.98	0.75	0.97	0.87	0.98	0.99	0.68	0.96	0.95	0.7	0.84	0.93	0.85	0.82	0.97	0.93	0.98	0.69	0.64	0.71	0.71	0.69
chr12:50071338:50071641:-@chr12:50070901:50070988:-@chr12:50063512:50063633:-	SE	0.049746	NA	0.65	0.72	NA	0.49	NA	NA	NA	NA	NA	0.65	NA	NA	NA	NA	NA	NA	NA	NA	NA	NA	0.48	NA	NA	NA	NA	0.38	NA	0.43	NA	NA	NA	NA
chr12:51578950:51578726|51578720:-@chr12:51578512:51578570:-	A5SS	0.00671334	0.63	0.68	0.54	0.7	0.55	0.5	0.62	0.56	0.78	0.94	0.26	0.75	0.46	0.86	0.56	0.51	0.63	0.62	0.85	0.54	0.33	0.31	0.45	0.45	0.6	0.58	0.64	0.31	0.34	0.29	0.63	0.54	0.38
chr12:51739098:51740309|51740018:+@chr12:51740456:51740606:+	A5SS	0.0343761	NA	NA	0.79	0.83	0.84	0.75	0.89	0.61	0.59	0.69	0.88	0.81	0.76	0.91	0.76	0.65	0.93	0.73	NA	0.93	0.59	0.82	0.81	0.58	0.66	0.84	0.54	0.79	0.87	0.61	0.66	0.58	0.41
chr12:51910104:51909962|51909893:-@chr12:51907390:51907738:-	A5SS	0.049746	NA	NA	NA	NA	0.3	NA	NA	NA	NA	NA	0.37	NA	NA	NA	NA	0.34	NA	NA	NA	NA	NA	0.46	NA	NA	NA	0.66	0.46	0.39	NA	NA	NA	NA	NA
chr12:52122746:52122784:+@chr12:52123442|52123447:52123824:+	A3SS	0.025998	0.58	0.66	0.54	0.57	0.87	0.8	0.46	NA	0.56	0.71	0.94	0.98	0.75	0.87	0.48	0.6	0.45	0.56	0.81	0.96	0.37	0.61	0.47	0.32	0.49	0.36	0.52	0.76	0.57	0.63	0.5	0.58	0.68
chr12:52122746:52122784:+@chr12:52123442|52123592:52123824:+	A3SS	0.0124848	0.84	0.83	0.82	0.92	0.62	0.83	0.85	NA	0.82	0.92	0.54	0.95	0.85	0.82	0.63	0.56	0.89	0.61	0.87	0.74	0.66	0.85	0.42	0.67	0.74	0.32	0.13	0.67	0.68	0.82	0.58	0.73	0.71
chr12:52122746:52122784:+@chr12:52123442|52123618:52123824:+	A3SS	0.0436005	0.79	0.85	0.7	0.89	0.88	0.83	0.77	NA	0.87	0.88	0.75	0.92	0.82	0.91	0.72	0.79	0.84	0.65	0.88	0.86	0.76	0.81	0.66	0.81	0.75	0.79	0.4	0.85	0.73	0.9	0.72	0.79	0.73
chr12:52122746:52122784:+@chr12:52123447|52123592:52123824:+	A3SS	0.0202221	0.85	0.86	0.82	0.9	0.58	0.8	0.86	NA	0.78	0.92	0.48	0.91	0.85	0.83	0.59	0.52	0.89	0.73	0.92	0.64	0.67	0.89	0.49	0.7	0.79	0.33	0.18	0.66	0.69	0.81	0.56	0.74	0.61
chr12:52122746:52122784:+@chr12:52123447|52123618:52123824:+	A3SS	0.0379342	0.73	0.87	0.7	0.91	0.86	0.86	0.8	NA	0.84	0.9	0.72	0.9	0.85	0.91	0.72	0.79	0.82	0.8	0.86	0.87	0.77	0.82	0.65	0.82	0.81	0.79	0.45	0.84	0.74	0.91	0.69	0.78	0.77
chr12:52122746:52122784:+@chr12:52123538|52123592:52123824:+	A3SS	0.012574	0.75	0.84	0.78	0.86	0.61	0.79	0.75	NA	0.72	0.89	0.57	0.88	0.82	0.66	0.5	0.47	0.83	0.73	0.82	0.71	0.59	0.84	0.48	0.64	0.53	0.33	0.22	0.51	0.51	0.78	0.74	0.73	0.57
chr12:54510011:54511134:+@chr12:54513010:54513089:+@chr12:54513498:54513639:+	SE	0.0346283	NA	0.42	0.38	0.44	0.57	0.5	0.59	NA	0.7	NA	0.67	0.44	0.63	0.39	0.53	0.65	0.59	0.53	0.41	0.71	NA	0.32	0.4	0.49	NA	0.4	0.59	0.46	0.39	0.4	NA	0.47	0.49
chr12:54518785:54518657|54518551:-@chr12:54517894:54518058:-	A5SS	0.0260696	NA	NA	0.7	0.71	0.36	NA	0.46	NA	0.51	0.24	0.48	0.23	0.48	NA	NA	NA	NA	NA	NA	0.59	NA	0.63	0.53	0.68	NA	NA	NA	0.77	0.66	NA	0.73	NA	NA
chr12:54522404:54522489:-@chr12:54521157:54521287:-@chr12:54520718:54520933:-	SE	0.00430767	NA	NA	0.67	NA	0.56	0.61	0.77	NA	0.54	0.74	0.7	0.8	0.79	NA	NA	NA	0.8	NA	NA	0.68	NA	0.44	0.56	0.55	NA	0.66	0.53	0.78	0.28	NA	0.37	0.47	0.54
chr12:54631674:54632150:+@chr12:54632392:54632482:+	RI	0.00589064	NA	NA	0.75	0.81	0.52	0.76	0.71	NA	0.51	NA	0.82	0.79	NA	0.78	0.6	0.65	0.74	0.74	0.81	0.68	NA	0.48	0.52	0.53	NA	0.61	NA	0.59	0.64	NA	NA	NA	0.52
chr12:55201876:55202140:+@chr12:55207916:55208010:+@chr12:55242468:55242634:+	SE	0.0461491	NA	NA	0.58	0.67	0.77	0.59	0.78	NA	0.84	NA	0.76	0.25	NA	NA	0.64	0.64	0.46	NA	NA	0.65	0.51	0.54	0.82	NA	0.4	0.76	0.52	0.46	0.51	0.54	0.5	0.48	0.41
chr12:55280015:55280168:-@chr12:55279753:55279899:-@chr12:55279180:55279409:-	SE	0.0258518	0.68	NA	0.58	0.79	0.9	0.77	0.89	0.64	0.83	0.9	0.96	0.9	0.75	0.92	NA	0.82	0.9	0.57	0.84	0.89	NA	0.86	0.88	0.55	NA	0.74	0.79	0.72	0.52	0.68	0.61	0.78	0.65
chr12:55325404:55325222|55325218:-@chr12:55324832:55325006:-	A5SS	0.0321679	0.47	0.1	0.3	0.36	0.27	0.29	0.35	0.46	0.49	0.47	0.29	0.47	0.18	0.5	0.19	0.13	0.34	0.47	0.56	0.45	0.12	0.29	0.23	0.3	0.19	0.27	0.46	0.27	0.26	0.3	0.31	0.2	0.27
chr12:55394738:55394653|55394649:-@chr12:55393837:55394490:-	A5SS	0.0117704	NA	NA	NA	0.64	0.62	0.45	0.6	0.5	0.54	0.48	0.32	0.6	0.48	0.48	NA	0.57	0.56	0.54	0.47	0.49	NA	0.32	0.45	0.59	NA	0.37	NA	0.41	0.42	0.42	0.48	NA	NA
chr12:55779065:55779490:-@chr12:55778842:55778952:-	RI	0.0330515	0.6	0.3	0.58	0.46	0.84	0.77	0.83	0.78	0.73	0.89	0.91	0.75	0.84	0.8	NA	0.84	0.57	0.69	0.8	0.79	0.76	0.64	0.78	0.71	0.37	0.62	0.68	0.8	0.48	0.43	0.72	0.56	0.64
chr12:56157206:56157730:-@chr12:56156896:56157013:-@chr12:56156640:56156701:-	SE	0.0419967	NA	NA	NA	0.44	0.34	NA	NA	NA	NA	NA	0.75	0.56	0.51	NA	0.42	NA	0.57	NA	NA	NA	NA	0.76	0.58	NA	NA	0.57	NA	0.59	0.73	NA	NA	NA	NA
chr12:56169317:56169395:+@chr12:56169478:56169608:+	RI	0.0425262	NA	NA	NA	0.57	0.65	0.55	0.62	NA	0.63	0.63	0.76	0.65	NA	0.68	NA	0.62	0.58	NA	0.59	0.63	NA	0.67	0.62	NA	NA	0.52	0.47	0.5	NA	NA	NA	0.53	0.59
chr12:56169474:56169612|56169608:+@chr12:56169946:56170083:+	A5SS	0.036447	NA	NA	NA	0.62	0.68	NA	0.68	NA	NA	0.62	0.65	NA	NA	NA	NA	0.57	NA	NA	NA	NA	NA	0.4	NA	NA	NA	0.54	NA	0.57	NA	NA	NA	NA	NA
chr12:56218574:56218569|56218533:-@chr12:56215106:56215895:-	A5SS	0.0378002	NA	NA	NA	0.56	0.49	0.41	0.4	NA	0.46	0.42	0.46	0.41	0.48	NA	NA	NA	0.56	NA	0.38	0.46	0.47	0.51	0.6	NA	NA	0.52	NA	0.51	0.43	NA	NA	0.62	NA
chr12:56284673:56284908:+@chr12:56285621:56285781:+@chr12:56286240:56286302:+	SE	0.049746	NA	NA	NA	NA	0.74	NA	NA	NA	NA	NA	0.69	NA	NA	NA	NA	0.62	NA	NA	NA	0.61	NA	0.6	NA	NA	NA	0.58	NA	0.6	NA	NA	NA	NA	NA
chr12:56425051:56425267:+@chr12:56425795:56425923:+@chr12:56426639:56426770:+@chr12:56427068:56427888:+	MXE	0.00568993	0.5	0.47	0.66	0.44	0.42	0.52	0.43	0.33	0.28	0.18	0.5	0.32	0.54	0.23	0.46	0.54	0.3	0.38	0.37	0.56	0.66	0.34	0.58	0.5	0.55	0.46	0.13	0.56	0.72	0.69	0.62	0.7	0.67
chr12:56432225:56432509:-@chr12:56431709|56431742:56431550:-	A3SS	0.0197805	NA	NA	0.71	0.87	0.94	0.88	0.87	0.6	0.82	0.82	0.89	0.86	0.83	0.89	0.66	0.82	0.9	NA	0.86	0.82	0.69	0.86	0.67	0.79	NA	0.93	0.55	0.87	0.45	0.47	0.72	0.75	0.55
chr12:56432225:56432509:-@chr12:56431709|56431746:56431550:-	A3SS	0.00637899	NA	NA	0.74	0.89	0.94	0.9	0.9	0.59	0.86	0.8	0.89	0.84	0.74	0.9	0.74	0.82	0.92	NA	0.93	0.83	0.64	0.84	0.64	0.63	NA	0.93	0.53	0.88	0.44	0.53	0.71	0.79	0.54
chr12:56432225:56432509:-@chr12:56431742|56431746:56431550:-	A3SS	0.0281339	NA	NA	0.6	0.69	0.9	0.7	0.84	0.63	0.77	0.71	0.93	0.73	0.54	0.81	0.63	0.83	0.87	NA	0.62	0.73	0.6	0.79	0.63	0.56	NA	0.84	0.52	0.84	0.62	0.47	0.52	0.47	0.64
chr12:56504369:56504277|56504267:-@chr12:56503928:56504139:-	A5SS	0.0363788	0.54	0.53	0.47	0.31	0.57	0.17	0.32	0.18	0.48	0.45	0.24	0.78	0.44	0.36	0.64	0.45	0.27	NA	0.63	0.75	0.38	0.21	0.35	0.25	0.18	0.24	0.32	0.31	0.24	0.28	0.33	0.5	0.51
chr12:56526422:56527014:-@chr12:56509646|56509676:56509498:-	A3SS	0.0281929	0.44	0.16	0.53	0.35	0.32	0.2	0.35	0.25	0.88	0.91	0.27	0.88	0.11	0.93	0.28	0.22	0.87	0.42	0.81	0.92	0.2	0.43	0.25	0.26	0.26	0.34	0.25	0.27	0.1	0.35	0.17	0.1	0.55
chr12:61001512:61001657:+@chr12:61005920:61005981:+@chr12:61035379:61035523:+	SE	0.0284534	0.62	0.36	0.71	0.75	0.64	0.63	0.64	NA	0.52	0.48	0.55	0.33	0.53	0.54	NA	0.62	0.71	NA	0.75	0.74	0.59	0.82	0.45	0.72	0.71	0.8	NA	0.9	0.72	0.74	0.62	NA	0.78
chr12:61164217:61164280:+@chr12:61170083:61170163:+@chr12:61173962:61174089:+	SE	0.00208858	NA	0.53	NA	0.52	0.55	0.47	0.55	0.51	NA	NA	0.48	0.34	0.5	NA	NA	0.51	0.48	0.5	0.53	0.52	NA	0.46	0.45	NA	NA	0.48	NA	0.48	0.48	0.46	0.42	0.46	0.27
chr12:6296974:6297123:+@chr12:6297284|6297326:6297421:+	A3SS	0.0480164	NA	NA	NA	0.63	0.76	0.66	0.71	NA	0.85	0.7	0.78	0.77	NA	0.7	NA	0.54	0.67	NA	0.58	0.63	NA	0.67	0.63	0.52	NA	0.72	NA	0.68	0.51	0.57	NA	0.63	0.57
chr12:6365774:6365871:+@chr12:6367225:6367295:+@chr12:6367825:6367932:+	SE	0.00576118	0.61	NA	0.68	0.57	0.59	0.67	0.63	0.55	0.61	0.7	0.72	0.69	0.56	0.7	NA	0.68	0.56	0.46	0.61	0.71	NA	0.67	0.46	0.54	NA	0.55	0.47	0.59	0.43	0.49	NA	0.51	0.66
chr12:6365774:6365871:+@chr12:6367825:6367932:+@chr12:6368227:6369767:+	SE	0.00856059	0.65	0.44	0.67	0.83	0.85	0.88	0.66	0.53	0.59	0.84	0.86	0.77	0.73	0.63	0.72	0.81	0.65	0.37	0.48	0.82	NA	0.76	0.6	0.49	0.65	0.55	0.6	0.7	0.43	0.45	0.43	0.45	0.31
chr12:64518566:64518616:+@chr12:64547536:64547854:+@chr12:64561790:64563522:+	SE	0.0125537	NA	0.49	NA	0.69	0.44	0.33	0.48	NA	0.39	0.42	0.58	0.39	0.61	NA	0.47	0.62	0.37	0.51	0.56	0.34	0.64	0.62	0.69	0.44	NA	0.69	0.49	0.63	0.52	0.49	NA	0.55	0.71
chr12:6567134:6567376:-@chr12:6566811:6566986:-	RI	0.0451105	NA	0.34	0.21	0.15	0.15	0.1	0.24	NA	0.32	0.19	0.18	0.09	0.14	0.05	0.31	0.14	0.12	0.56	0.25	0.08	0.41	0.16	0.27	0.26	0.3	0.3	0.54	0.21	0.16	0.19	0.14	0.31	0.48
chr12:66328769:66329229:+@chr12:66329844:66329992:+@chr12:66337153:66345459:+	SE	0.0484439	0.57	0.4	0.49	0.5	0.7	0.74	0.73	0.75	0.4	0.47	0.74	0.29	0.55	0.23	0.54	0.58	0.6	0.66	0.37	0.4	0.7	0.68	0.66	0.73	0.57	0.68	0.89	0.64	0.52	0.45	0.58	0.78	0.66
chr12:6800973:6801327:+@chr12:6802895:6803190:+@chr12:6804910:6805099:+	SE	0.0285714	NA	NA	NA	NA	NA	NA	0.7	NA	NA	NA	0.82	NA	NA	NA	NA	0.72	0.77	NA	NA	NA	NA	0.69	NA	NA	NA	0.47	NA	0.66	NA	0.54	NA	NA	NA
chr12:6830647:6831502:-@chr12:6830258:6830434:-@chr12:6829624:6830021:-	SE	0.0153243	NA	NA	NA	NA	0.89	0.8	0.87	NA	NA	0.85	0.95	0.83	NA	0.85	NA	NA	0.89	NA	NA	0.88	NA	0.8	0.76	NA	NA	0.82	0.7	NA	0.71	0.87	NA	NA	NA
chr12:69202571:69202677:+@chr12:69207722:69207785:+@chr12:69218097:69218860:+	SE	0.022742	NA	NA	NA	0.51	0.41	0.35	0.4	NA	0.5	NA	0.62	0.32	0.5	NA	NA	0.41	0.48	NA	NA	0.41	NA	0.79	0.59	0.53	0.44	0.62	NA	0.74	0.4	0.63	NA	NA	NA
chr12:6930865:6931155:+@chr12:6931407|6931441:6931601:+	A3SS	0.0401195	NA	NA	NA	0.84	0.84	0.86	0.68	0.69	0.75	NA	0.93	0.72	0.71	0.83	NA	0.6	0.93	0.65	NA	0.91	NA	0.82	0.79	0.61	NA	0.6	0.46	0.81	0.84	0.67	NA	0.61	0.55
chr12:6945924:6945848|6945839:-@chr12:6944771:6945136:-	A5SS	0.0279952	0.56	0.62	0.9	0.9	0.96	0.96	0.86	0.44	0.93	0.97	0.97	0.97	0.75	0.86	0.81	0.91	0.97	0.79	0.94	0.92	0.71	0.89	0.93	0.72	0.57	0.96	0.71	0.81	0.81	0.66	0.43	0.77	0.81
chr12:6995839:6996318:-@chr12:6962854:6962961:-@chr12:6962040:6962204:-	SE	0.00837573	0.79	0.85	0.91	0.86	0.88	0.93	0.87	0.57	0.82	0.9	0.97	0.91	0.51	0.87	0.72	0.89	0.92	0.57	0.88	0.9	0.74	0.72	0.86	0.69	0.74	0.83	0.75	0.84	0.77	0.69	0.73	0.8	0.77
chr12:74740185:74740326:-@chr12:74739845:74739925:-@chr12:74736080:74736208:-	SE	0.00969162	0.81	0.83	0.87	0.87	0.88	0.68	0.94	0.79	0.81	0.88	0.93	0.85	0.89	0.87	0.89	0.97	0.9	0.85	0.84	0.86	0.94	0.97	0.93	0.96	0.81	0.95	0.89	0.89	0.97	0.93	0.85	0.88	0.92
chr12:78699726:78701040:-@chr12:78697250:78697262:-@chr12:78696461:78696511:-	SE	0.0203089	NA	NA	0.6	0.33	0.53	0.47	0.61	NA	0.6	NA	0.37	0.63	0.54	0.45	0.65	0.56	0.59	0.52	0.37	0.49	NA	0.44	0.48	0.58	NA	0.48	NA	0.35	0.46	0.42	0.33	0.43	0.36
chr12:78704285:78704825:-@chr12:78700482:78700506:-@chr12:78696461:78699773:-	SE	0.00976513	0.49	0.47	0.47	0.6	0.49	0.47	0.4	0.37	0.52	0.53	0.42	0.49	0.61	0.41	0.47	0.36	0.43	0.38	0.39	0.5	0.64	0.41	0.62	0.55	0.59	0.68	0.52	0.52	0.62	0.58	0.58	0.38	0.43
chr12:78725137:78725266:-@chr12:78724077:78724244:-@chr12:78723503:78723679:-	SE	0.0364303	0.74	0.71	0.53	0.84	0.62	0.68	0.53	0.68	0.18	0.8	0.6	0.77	0.52	0.66	NA	0.55	0.81	0.73	0.72	0.85	0.42	0.59	0.73	0.79	0.63	0.66	0.52	0.39	0.58	0.54	0.65	0.48	0.45
chr12:81356425:81356701:+@chr12:81374637:81374730:+@chr12:81394554:81394628:+	SE	0.0173655	NA	NA	NA	NA	0.51	NA	NA	NA	NA	NA	0.49	NA	0.43	NA	NA	NA	NA	NA	0.48	0.35	NA	0.72	0.53	NA	NA	0.63	NA	0.49	0.58	0.59	NA	NA	NA
chr12:88520951:88522254:-@chr12:88519234:88519341:-@chr12:88517025:88517207:-	SE	0.0353658	0.73	0.88	0.76	0.75	0.73	0.85	0.88	0.81	0.92	0.96	0.88	0.88	0.74	0.9	0.72	0.91	0.91	0.73	0.9	0.93	0.82	0.85	0.75	0.81	0.55	0.87	0.66	0.84	0.8	0.7	0.75	0.79	0.76
chr12:892251:892816:-@chr12:891923:892250:-	TandemUTR	0.00995187	NA	NA	NA	0.52	0.71	0.54	0.56	NA	0.32	0.41	0.71	0.31	0.68	0.49	NA	0.58	0.34	NA	0.43	0.17	0.51	0.74	0.8	NA	NA	0.86	0.53	0.79	0.56	0.62	NA	0.59	0.69
chr12:90100563:90101032:-@chr12:90097270:90097594:-@chr12:90096250:90096493:-	SE	0.00929021	0.68	0.43	0.68	0.58	0.7	0.49	0.57	0.48	0.59	0.6	0.72	0.54	0.72	0.56	0.59	0.54	0.5	0.53	0.89	0.81	0.52	0.55	0.6	0.48	0.47	0.42	0.32	0.57	0.5	0.57	0.57	0.28	0.51
chr12:92295793:92296328:+@chr12:92312516:92312626:+@chr12:92313396:92313440:+	SE	0.0140369	0.47	0.59	0.37	0.58	0.46	0.61	0.76	0.19	0.85	0.93	0.91	0.74	0.5	0.59	0.52	0.88	0.94	0.41	NA	0.63	0.56	0.15	0.17	0.63	0.8	0.28	0.13	0.27	0.49	0.45	0.33	0.66	0.46
chr12:97511534:97512044:+@chr12:97513636|97513638:97513757:+	A3SS	0.0425322	0.74	0.83	0.83	0.9	0.96	0.91	0.92	0.67	0.59	0.68	0.97	0.44	0.87	0.68	0.61	0.92	0.64	0.68	0.69	0.58	0.72	0.98	0.95	0.81	0.84	0.96	0.82	0.91	0.87	0.93	0.82	0.86	0.86
chr12:9798925:9799405:-@chr12:9798450:9798531:-@chr12:9796339:9797452:-	SE	0.0180867	0.58	0.7	0.75	0.66	0.71	0.78	0.67	0.71	0.68	0.81	0.7	0.75	0.7	0.83	0.62	0.64	0.93	0.23	NA	0.62	0.71	0.65	0.64	0.69	0.33	0.42	0.64	0.73	0.67	0.62	0.5	0.51	0.5
chr13:110356381:110356472:-@chr13:110344457:110344550:-@chr13:110343040:110343611:-	SE	0.0299419	0.19	0.31	0.43	0.65	0.62	0.54	0.31	0.59	0.59	0.94	0.62	0.53	0.41	0.71	0.51	0.36	0.63	NA	0.55	0.57	0.45	0.36	0.39	0.6	0.36	0.47	0.34	0.36	0.41	0.3	0.22	0.25	0.65
chr13:110356381:110356472:-@chr13:110353824:110353887:-@chr13:110343040:110343611:-	SE	0.0330354	0.22	0.44	0.26	0.61	0.63	0.6	0.36	0.46	0.6	0.95	0.69	0.6	0.48	0.71	0.61	0.38	0.66	NA	0.57	0.57	0.7	0.33	0.51	0.45	0.41	0.5	0.26	0.4	0.21	0.21	0.28	0.21	0.73
chr13:112910339:112910971:-@chr13:112902696:112902831:-@chr13:112900506:112900579:-	SE	0.0484245	NA	0.45	NA	0.44	0.72	0.59	0.49	NA	NA	0.64	0.6	0.58	0.54	0.65	NA	0.4	NA	NA	NA	NA	0.41	0.58	0.3	NA	NA	0.4	0.51	0.35	0.47	0.29	0.52	0.64	NA
chr13:113057639:113057797:-@chr13:113054109:113054274:-@chr13:113053165:113053289:-	SE	0.02062	0.52	0.26	0.21	0.38	0.17	0.19	0.39	0.56	0.06	0.19	0.16	0.19	0.11	0.15	NA	0.33	0.26	0.48	0.13	0.21	NA	0.51	0.27	NA	NA	0.48	0.58	0.13	0.23	NA	0.58	0.46	0.57
chr13:113066078:113066397:-@chr13:113057639:113057797:-@chr13:113053165:113053289:-	SE	0.0371068	0.76	0.78	0.87	0.86	0.93	0.92	0.82	0.76	0.93	0.89	0.97	0.79	0.77	0.88	0.43	0.75	0.85	0.76	0.84	0.88	0.53	0.89	0.93	0.62	NA	0.92	0.66	0.81	0.68	0.5	0.74	0.72	0.59
chr13:113192983:113193269:-@chr13:113186512|113186539:113186156:-	A3SS	0.0098771	0.59	0.52	NA	0.56	0.59	0.68	0.55	NA	0.51	NA	0.47	NA	0.57	NA	0.52	0.56	0.55	NA	NA	0.6	0.58	0.49	0.57	0.37	0.44	0.51	0.44	0.31	0.35	0.52	NA	NA	NA
chr13:113338850:113339016:+@chr13:113340134:113340200:+@chr13:113342436:113343789:+	SE	0.0192044	0.69	0.39	0.77	0.76	0.65	0.56	0.76	0.67	0.7	0.83	0.69	0.82	0.6	0.95	0.67	0.81	0.87	0.29	0.94	0.6	0.56	0.68	0.77	0.75	0.44	0.6	0.64	0.66	0.5	0.38	0.53	0.33	0.68
chr13:114067671:114067941|114067935:+@chr13:114070096:114071201:+	A5SS	0.0307966	NA	0.45	0.5	0.42	0.58	0.58	0.58	0.51	0.49	0.49	0.57	0.53	0.48	0.49	0.53	0.49	0.52	0.51	0.45	0.69	NA	0.51	0.5	0.45	0.42	0.42	0.37	0.6	0.45	0.4	0.49	0.53	0.41
chr13:114075182:114075369:+@chr13:114082417|114082426:114082577:+	A3SS	0.026106	NA	NA	NA	0.76	0.7	0.61	0.6	NA	NA	NA	0.72	0.41	0.52	0.65	NA	0.83	0.75	NA	NA	0.56	0.73	0.86	NA	NA	0.73	NA	NA	0.81	0.73	0.77	NA	NA	0.75
chr13:20630061:20630264:-@chr13:20627832:20627950:-@chr13:20625734:20627289:-	SE	0.0154808	NA	NA	0.68	0.77	0.85	0.87	0.65	NA	0.62	0.82	0.86	0.37	0.48	0.79	0.44	0.47	0.76	NA	0.65	0.78	NA	0.72	0.37	0.58	NA	0.31	0.49	0.59	0.47	0.65	0.55	0.49	0.44
chr13:23694956:23696720:+@chr13:23721615:23721980:+@chr13:23723856:23724000:+	SE	0.0464922	0.7	0.89	0.54	0.83	0.91	0.86	0.84	0.69	0.85	0.84	0.94	0.91	0.85	0.92	0.51	0.78	0.49	0.81	0.76	0.89	0.4	0.79	0.88	0.68	0.55	0.74	0.74	0.83	0.76	0.86	0.41	0.56	0.82
chr13:27093474:27094146|27093574:+@chr13:27120516:27120590:+	A5SS	0.042837	0.67	0.57	0.48	0.49	0.51	0.64	0.5	0.56	0.55	0.56	0.46	0.46	0.57	NA	0.4	0.47	0.52	0.37	NA	0.45	0.55	0.4	0.62	0.63	0.57	0.53	0.49	0.59	0.59	0.63	0.57	0.52	0.6
chr13:27738852:27739013:+@chr13:27739232:27739348:+@chr13:27739437:27739538:+	SE	0.0449075	NA	NA	0.56	0.57	0.78	0.57	0.78	NA	0.75	0.58	0.85	0.56	0.48	0.74	0.63	0.71	0.72	NA	0.67	0.67	NA	0.54	0.62	0.6	NA	0.67	0.65	0.5	0.59	0.39	0.24	NA	0.63
chr13:36475071:36475144:+@chr13:36476653:36476698:+	RI	0.00442567	NA	0.38	0.41	0.49	0.44	0.3	0.35	0.47	0.54	0.48	0.62	0.39	0.42	0.4	0.47	0.54	0.38	0.36	0.43	0.54	NA	0.46	0.45	0.5	0.57	0.54	0.56	0.62	0.58	0.58	NA	0.48	0.48
chr13:36476855:36479208:+@chr13:36480194|36480199:36480314:+	A3SS	0.00812925	NA	0.39	0.53	0.54	0.6	0.53	0.46	0.55	0.55	0.35	0.53	0.45	0.28	0.39	0.42	0.54	0.39	NA	0.52	0.67	0.49	0.69	0.68	0.5	0.55	0.61	0.67	0.66	0.59	0.58	0.49	0.6	0.52
chr13:36491479:36492076:-@chr13:36489465|36489501:36489382:-	A3SS	0.0279817	NA	NA	NA	0.56	0.49	0.49	0.73	NA	0.47	NA	0.44	0.59	0.68	NA	NA	0.67	NA	0.49	NA	0.34	NA	0.42	NA	NA	NA	0.43	NA	0.43	0.32	0.49	NA	0.46	0.49
chr13:40734547:40734617:-@chr13:40733827:40733961:-@chr13:40732629:40733051:-	SE	0.0481585	NA	0.54	0.4	0.45	0.34	0.37	0.57	NA	0.59	0.41	0.18	0.39	0.36	0.32	NA	0.57	0.49	NA	0.33	0.49	0.45	0.56	0.38	0.48	NA	0.66	0.58	0.31	0.58	0.49	NA	0.63	0.73
chr13:40735620:40735411|40735409:-@chr13:40733788:40734467:-	A5SS	0.0333082	NA	NA	NA	0.44	0.42	0.46	0.56	NA	NA	NA	0.44	NA	0.38	0.53	NA	0.38	0.39	NA	NA	0.35	NA	NA	0.63	NA	NA	0.61	NA	0.46	0.5	NA	NA	NA	NA
chr13:40803410:40803505:+@chr13:40808786:40808892:+@chr13:40827280:40827352:+	SE	0.0357143	NA	NA	NA	NA	0.54	NA	NA	NA	NA	NA	0.49	NA	NA	NA	NA	0.51	NA	NA	NA	NA	NA	0.41	0.47	NA	NA	0.42	NA	0.4	NA	0.39	NA	NA	NA
chr13:44480930:44481135|44481014:+@chr13:44487087:44487218:+	A5SS	0.0437156	NA	0.4	0.62	0.62	0.45	0.63	0.39	NA	NA	NA	0.22	0.5	0.53	0.26	NA	0.64	0.51	0.42	0.35	NA	0.46	0.36	0.47	0.3	0.13	0.24	NA	0.34	NA	NA	NA	0.23	0.5
chr13:44812319:44812129|44812100:-@chr13:44811632:44811737:-	A5SS	0.0387125	0.48	0.43	0.46	0.41	0.56	0.51	0.54	0.49	0.62	0.63	0.56	0.61	0.37	0.65	0.38	0.54	0.63	0.39	0.58	0.66	0.47	0.52	0.54	0.38	0.4	0.56	0.46	0.54	0.45	0.4	0.45	0.37	0.4
chr13:44812920:44812847|44812826:-@chr13:44810795:44812319:-	A5SS	0.0066629	0.62	0.6	0.65	0.75	0.64	0.58	0.65	0.81	0.57	0.55	0.62	0.55	0.65	0.55	0.7	0.61	0.6	0.6	0.52	0.56	0.69	0.61	0.68	0.69	0.74	0.66	0.76	0.58	0.7	0.66	0.69	0.68	0.64
chr13:45614428:45614561:-@chr13:45606263:45606386:-@chr13:45602950:45603074:-	SE	0.0406189	0.66	0.55	0.82	0.66	0.6	0.61	0.66	0.71	0.78	0.49	0.7	0.84	0.51	0.79	0.62	0.82	0.87	0.74	0.65	0.71	0.52	0.66	0.75	0.62	0.58	0.67	0.47	0.65	0.64	0.61	0.5	0.72	0.4
chr13:47832154:47832264:+@chr13:47834952:47835094:+@chr13:47837031:47837108:+	SE	0.00977264	0.55	0.56	0.35	0.42	0.52	0.47	0.47	0.36	0.47	0.63	0.37	0.34	0.51	0.56	0.54	0.27	0.48	0.44	0.54	0.43	0.64	0.62	0.55	0.52	0.54	0.53	NA	0.6	0.63	0.61	NA	0.5	0.42
chr13:48873532:48873724:-@chr13:48873270:48873407:-@chr13:48854644:48855078:-	SE	0.0373482	NA	NA	0.64	NA	0.55	0.51	0.51	0.63	NA	NA	0.57	0.3	NA	NA	NA	0.85	0.68	NA	NA	0.55	0.84	0.65	0.71	0.63	0.68	0.78	NA	0.81	0.75	NA	0.82	0.47	NA
chr13:48993031:48993077:+@chr13:48993275:48993637:+@chr13:48994180:48994244:+	SE	0.0344389	NA	NA	NA	0.66	NA	NA	0.48	NA	NA	NA	0.42	0.58	0.46	0.54	NA	0.48	NA	NA	NA	NA	NA	0.41	0.38	NA	NA	0.51	NA	NA	0.31	NA	NA	NA	0.37
chr13:49005942:49006257:-@chr13:49004083:49005941:-	TandemUTR	0.0406526	0.32	0.65	0.61	0.59	0.8	0.59	0.58	0.53	0.48	0.44	0.69	0.52	0.81	0.69	0.42	0.76	0.62	0.62	0.65	0.23	0.68	0.81	0.71	0.54	0.69	0.74	0.62	0.67	0.72	0.76	0.63	0.56	0.63
chr13:49135194:49135982:-@chr13:49134003:49134064:-@chr13:49132811:49133345:-	SE	0.024526	0.29	0.53	0.49	0.2	0.47	0.48	0.56	0.7	0.82	0.64	0.55	0.55	0.3	0.48	0.6	0.42	0.86	0.32	0.38	0.76	0.3	0.5	0.37	0.23	0.42	0.46	0.42	0.52	0.51	0.31	0.44	0.12	0.39
chr13:49178235:49178306:-@chr13:49177758:49177920:-@chr13:49174523:49174617:-	SE	0.00588287	NA	0.54	0.46	0.56	0.49	0.51	0.56	NA	0.63	0.57	0.41	0.47	0.54	0.49	0.51	0.65	0.51	NA	0.42	0.53	0.44	0.41	0.51	0.47	0.45	0.46	NA	0.43	0.46	0.45	0.56	0.39	0.45
chr13:49554306:49554694:+@chr13:49555279:49555331:+@chr13:49576841:49579355:+	SE	0.0182664	0.5	0.23	0.74	0.65	0.7	0.77	0.61	0.53	0.56	0.65	0.67	0.8	0.48	0.7	0.71	0.83	0.72	0.44	0.55	0.73	0.37	0.62	0.71	0.46	0.46	0.61	0.61	0.39	0.7	0.4	0.32	0.64	0.42
chr13:50902431:50902520:-@chr13:50895167:50895227:-@chr13:50867332:50867620:-	SE	0.0437723	0.63	NA	NA	0.65	0.67	0.69	0.69	0.64	0.72	0.88	0.78	0.57	0.84	0.71	0.65	0.77	0.78	NA	0.28	0.82	0.68	0.52	0.61	0.45	NA	0.49	0.81	0.57	0.81	0.72	0.59	0.33	0.54
chr13:75306363:75306524:+@chr13:75307289|75307370:75307476:+	A3SS	0.0320156	0.78	0.72	0.22	0.46	0.38	0.46	0.54	0.73	0.67	0.86	0.45	0.56	0.57	0.78	0.59	0.59	0.77	0.68	0.76	0.55	0.31	0.49	0.59	0.65	NA	0.56	0.59	0.31	0.31	0.37	0.5	0.34	0.66
chr13:96797059:96797322:+@chr13:96807051:96807104:+@chr13:96807737:96809540:+	SE	0.0233768	0.49	0.35	0.74	0.31	0.65	0.62	0.7	0.76	0.42	0.78	0.67	0.71	0.28	0.9	0.5	0.39	0.63	0.45	0.31	0.7	0.3	0.44	0.61	0.25	0.34	0.52	0.61	0.47	0.41	0.34	0.57	0.4	0.31
chr13:97898572:97898693:+@chr13:97898694:97900024:+	TandemUTR	0.0389048	NA	0.38	0.65	0.6	0.63	0.59	0.54	0.24	0.59	0.54	0.55	0.61	0.45	0.64	0.53	0.41	0.57	NA	0.55	0.54	0.36	0.51	0.49	0.62	0.52	0.49	0.51	0.49	0.42	0.59	0.4	0.5	0.51
chr14:100365124:100371969:+@chr14:100372132|100372135:100372165:+	A3SS	0.0453036	NA	0.55	0.52	0.69	0.45	0.56	0.46	0.48	0.55	0.55	0.39	0.5	0.55	0.44	0.42	0.58	0.55	0.43	0.46	0.58	0.44	0.47	0.58	0.31	0.5	0.52	0.52	0.4	0.41	0.38	0.47	0.31	0.47
chr14:101345894:101346126:+@chr14:101355082:101355175:+@chr14:101392776:101392975:+	SE	0.0281006	0.39	0.35	0.35	0.24	0.35	0.33	0.43	0.52	0.53	0.3	0.31	0.36	0.18	0.56	0.54	0.24	0.39	0.75	0.42	0.28	0.2	0.24	0.42	0.32	0.09	0.35	0.61	0.36	0.33	0.09	0.21	0.19	0.2
chr14:102998488:102998551:+@chr14:103001647:103001883:+@chr14:103002062:103002181:+	SE	0.0232556	0.59	0.62	0.57	0.59	0.6	0.6	0.57	NA	0.46	0.61	0.37	0.53	0.52	0.59	0.39	0.49	0.4	0.59	0.48	0.53	0.48	0.49	0.28	0.44	0.43	0.59	0.43	0.45	0.31	0.38	0.51	0.41	0.67
chr14:103016477:103016580:+@chr14:103027867:103028124:+@chr14:103038972:103039930:+	SE	0.0462542	0.7	0.87	0.79	0.92	0.91	0.91	0.91	0.71	0.94	0.84	0.93	0.84	0.88	0.89	0.79	0.92	0.79	0.58	0.91	0.83	0.75	0.96	0.8	0.63	0.75	0.68	0.52	0.92	0.76	0.82	0.81	0.83	0.72
chr14:103110197:103110260:+@chr14:103117659:103117746:+@chr14:103123364:103123454:+	SE	0.0143243	NA	NA	0.4	0.54	0.45	NA	NA	0.52	0.4	NA	0.45	0.36	NA	0.45	NA	NA	NA	NA	0.46	NA	NA	0.54	0.47	NA	NA	0.55	NA	0.57	0.5	NA	0.52	NA	0.5
chr14:103274769:103274902:-@chr14:103273784:103273950:-@chr14:103272093:103272292:-	SE	0.0230078	NA	NA	0.73	0.76	0.66	0.71	0.76	0.46	0.75	0.73	0.85	0.69	0.71	0.74	NA	0.67	0.72	NA	0.77	0.71	NA	0.69	0.73	NA	NA	0.65	0.73	0.72	0.49	0.52	0.61	0.6	0.67
chr14:103457560:103457656:-@chr14:103457030:103457298:-@chr14:103450818:103451279:-	SE	0.0272395	NA	NA	0.62	0.32	0.63	0.73	0.43	NA	0.64	0.6	0.47	0.27	NA	0.72	0.61	0.65	NA	0.6	NA	0.57	NA	0.53	0.53	NA	0.3	0.4	0.49	0.37	0.46	NA	0.53	NA	0.47
chr14:104548086:104548584:-@chr14:104547316:104548085:-	TandemUTR	0.0165133	NA	0.73	0.69	0.79	0.78	0.29	0.75	0.52	0.56	0.19	0.78	0.76	0.77	0.64	NA	0.56	0.53	NA	0.22	0.36	0.77	0.82	0.78	0.71	NA	0.77	0.48	0.77	0.8	0.9	0.72	0.74	0.78
chr14:104786531:104786786:-@chr14:104778647:104778796:-@chr14:104766202:104766295:-	SE	0.0494912	NA	NA	NA	NA	0.58	0.61	0.49	0.47	NA	0.59	0.53	NA	NA	0.59	NA	NA	NA	NA	0.56	NA	NA	NA	NA	NA	NA	NA	0.44	0.45	NA	NA	NA	NA	NA
chr14:104991575:104991692:+@chr14:104992010:104992083:+@chr14:104995652:104995754:+	SE	0.00760444	NA	NA	0.57	0.56	0.58	0.62	0.77	NA	0.61	0.74	0.76	0.67	NA	0.6	NA	0.73	0.69	NA	0.59	NA	0.56	0.65	0.52	0.49	NA	0.62	0.54	0.68	0.58	0.49	NA	0.44	0.56
chr14:105542285:105542595:-@chr14:105402662:105402740:-@chr14:105400453:105400536:-@chr14:105382753:105383055:-	MXE	0.024256	0.46	0.41	0.4	0.46	0.58	0.54	0.52	0.54	0.55	0.66	0.88	0.62	0.42	0.43	0.51	0.48	0.49	0.54	0.59	0.43	0.44	0.64	0.76	0.49	NA	0.67	0.65	0.55	0.67	0.47	NA	0.64	0.67
chr14:105549133:105549456:-@chr14:105246097|105246102:105245741:-	A3SS	0.0424976	0.47	0.4	0.37	0.25	0.21	0.31	0.19	0.22	0.52	0.34	0.33	0.28	0.23	0.46	0.52	0.2	0.11	0.4	0.31	0.24	0.44	0.13	0.56	0.35	0.74	0.49	0.61	0.23	0.58	0.52	0.27	0.4	0.31
chr14:105549133:105549456:-@chr14:105246100|105246102:105245741:-	A3SS	0.0371021	0.51	0.43	0.36	0.37	0.32	0.35	0.38	0.32	0.39	0.42	0.47	0.46	0.38	0.53	0.62	0.46	0.19	0.43	0.29	0.41	0.49	0.19	0.64	0.63	0.61	0.37	0.68	0.38	0.47	0.49	0.49	0.56	0.37
chr14:105549133:105549456:-@chr14:105246100|105246107:105245741:-	A3SS	0.0405012	0.43	0.51	0.37	0.28	0.24	0.35	0.24	0.21	0.54	0.24	0.35	0.37	0.12	0.44	0.41	0.33	0.12	0.59	0.19	0.24	0.33	0.2	0.49	0.41	0.67	0.6	0.76	0.33	0.37	0.47	0.32	0.44	0.48
chr14:105549139:105549456:-@chr14:105401842:105401913:-@chr14:105400453:105400536:-@chr14:105382753:105383055:-	MXE	0.0405685	0.49	0.48	0.58	0.45	0.49	0.26	0.1	0.27	0.31	0.68	0.32	0.2	0.23	0.55	0.5	0.59	0.49	0.42	0.43	0.73	0.48	0.49	0.32	0.59	0.54	0.55	0.56	0.58	0.57	0.73	0.57	0.51	0.45
chr14:105796240:105796550:-@chr14:105246097|105246107:105245741:-	A3SS	0.0165276	0.34	0.33	0.31	0.35	0.32	0.49	0.55	0.6	0.56	0.51	0.51	0.6	0.13	0.67	0.28	0.46	0.54	0.64	0.51	0.54	0.32	0.44	0.52	0.23	0.44	0.48	0.53	0.33	0.12	0.43	0.13	0.23	0.27
chr14:105796240:105796550:-@chr14:105401470:105401559:-@chr14:105400453:105400536:-@chr14:105382753:105383055:-	MXE	0.0134965	0.45	0.57	0.61	0.85	0.87	0.86	0.83	0.91	0.88	0.33	0.89	0.86	0.76	0.76	0.48	0.84	0.82	0.76	0.75	0.82	0.54	0.78	0.89	0.23	0.39	0.61	0.83	0.56	0.43	0.52	0.49	0.41	0.59
chr14:105796240:105796550:-@chr14:105401842:105401913:-@chr14:105400453:105400536:-@chr14:105382753:105383055:-	MXE	0.0390067	0.76	0.37	0.36	0.14	0.26	0.59	0.33	0.46	0.46	0.6	0.18	0.2	0.21	0.28	0.4	0.37	0.29	0.6	0.11	0.55	0.65	0.35	0.15	0.72	0.53	0.67	0.42	0.78	0.71	0.47	0.28	0.54	0.54
chr14:105796240:105796550:-@chr14:105402454:105402519:-@chr14:105400453:105400536:-@chr14:105382753:105383055:-	MXE	0.0388596	0.59	0.42	0.27	0.12	0.22	0.45	0.37	0.29	0.35	0.65	0.18	0.34	0.32	0.38	0.37	0.39	0.29	0.42	0.23	0.5	0.59	0.5	0.13	0.68	0.5	0.76	0.22	0.72	0.79	0.39	0.23	0.39	0.64
chr14:105796240:105796550:-@chr14:105402454:105402519:-@chr14:105401470:105401559:-@chr14:105382753:105383055:-	MXE	0.0354736	0.72	0.35	0.42	0.6	0.88	0.95	0.9	0.88	0.94	0.44	0.91	0.88	0.69	0.75	0.34	0.85	0.9	0.81	0.72	0.85	0.65	0.9	0.73	0.26	0.57	0.84	0.82	0.7	0.6	0.42	0.26	0.37	0.6
chr14:19911010:19911146:-@chr14:19910732:19910856:-@chr14:19909488:19909631:-	SE	0.0133535	0.62	0.69	0.67	0.6	0.68	NA	0.81	0.61	0.83	0.79	0.6	0.72	0.53	0.82	NA	0.64	0.63	0.63	0.77	0.81	0.46	0.44	0.64	0.51	NA	0.7	0.46	0.62	0.59	0.71	NA	0.67	0.49
chr14:19993219:19993702:+@chr14:19993913|19993915:19994100:+	A3SS	0.00230629	0.71	0.7	0.69	0.78	0.72	0.71	0.7	NA	0.73	0.7	0.88	0.86	0.82	0.83	NA	0.7	0.89	0.46	0.5	0.61	0.65	0.41	0.61	0.65	0.53	0.59	0.62	0.84	0.69	0.61	0.4	0.55	0.56
chr14:19993577:19993702:+@chr14:19993913:19994100:+	RI	0.0348685	NA	0.08	0.14	0.22	0.06	0.13	0.28	NA	0.06	0.05	0.04	0.19	0.05	0.06	NA	0.03	0.02	NA	0.28	0.08	0.1	0.59	0.3	0.05	0.23	0.22	0.19	0.06	0.1	0.17	0.54	0.27	0.07
chr14:20340796:20341277:-@chr14:20340248:20340330:-@chr14:20339350:20340092:-	SE	0.0482558	0.23	0.18	0.16	0.08	0.14	0.13	0.17	0.54	0.16	0.21	0.21	0.11	0.08	0.26	0.15	0.19	0.26	0.24	0.29	0.38	0.09	0.16	0.19	0.19	0.07	0.18	0.26	0.15	0.15	0.08	0.12	0.13	0.09
chr14:20561240:20561744:-@chr14:20560863:20560901:-@chr14:20560391:20560496:-	SE	0.0435532	NA	NA	NA	0.79	0.75	0.74	0.8	NA	0.76	0.83	0.9	0.8	0.7	0.61	NA	0.83	0.89	NA	0.83	NA	0.75	0.78	0.76	0.68	NA	0.8	0.73	0.87	0.64	0.41	0.73	0.41	0.75
chr14:20974900:20975242:-@chr14:20969810:20969857:-@chr14:20966963:20967334:-	SE	0.0440123	0.52	0.57	0.5	0.27	0.33	0.37	0.43	NA	0.33	0.49	0.24	0.42	0.42	0.46	0.4	0.29	0.55	NA	0.46	0.24	0.47	0.58	0.49	0.54	0.54	0.53	0.54	0.36	0.47	0.48	0.43	0.33	NA
chr14:21012866:21012933:-@chr14:21006356:21006448:-@chr14:21001655:21001766:-	SE	0.049746	NA	NA	NA	NA	0.51	NA	NA	NA	NA	NA	0.52	NA	0.54	NA	NA	NA	NA	NA	NA	NA	NA	0.36	0.44	NA	NA	NA	NA	NA	NA	0.49	NA	0.49	NA
chr14:22127693:22128018:-@chr14:22113795:22113973:-@chr14:22103639:22103877:-	SE	0.0293264	0.85	0.65	0.88	0.88	0.9	0.85	0.87	0.89	0.94	0.98	0.93	0.94	0.77	0.99	0.92	0.91	0.97	0.88	0.88	0.93	0.81	0.87	0.93	0.8	0.85	0.93	0.9	0.83	0.89	0.76	0.78	0.81	0.86
chr14:22307007:22307220:+@chr14:22308826|22308846:22308983:+	A3SS	0.0324142	0.66	0.71	0.7	0.8	0.74	0.81	0.87	0.87	0.91	0.94	0.8	0.81	0.78	0.91	0.28	0.79	0.66	0.56	0.56	0.84	0.53	0.57	0.85	0.54	0.28	0.79	0.86	0.68	0.61	0.77	0.7	0.66	0.53
chr14:22416576:22416885:+@chr14:22416886:22417133:+	TandemUTR	0.0404844	0.74	0.9	0.83	0.96	0.89	0.86	0.76	0.39	0.82	0.47	0.81	0.49	0.91	0.84	0.66	0.87	0.47	0.74	0.85	0.52	0.85	0.87	0.86	0.83	0.87	0.92	0.55	0.87	0.89	0.93	0.89	0.83	0.84
chr14:22629571:22629682:-@chr14:22629031:22629150:-@chr14:22620797:22620885:-	SE	0.0294216	0.51	0.54	0.39	0.66	0.57	0.43	0.39	0.54	0.52	0.09	0.64	0.51	0.52	0.49	0.34	0.38	0.45	0.44	0.66	0.46	0.52	0.61	0.59	0.47	0.53	0.6	0.67	0.54	0.44	0.54	0.59	0.65	0.51
chr14:23638098:23638296|23638285:+@chr14:23638607:23639352:+	A5SS	0.0443417	0.68	0.59	0.89	0.8	0.68	0.79	0.73	0.88	0.84	0.82	0.79	0.81	0.63	0.89	0.9	0.76	0.89	0.78	0.79	0.87	0.6	0.68	0.82	0.69	0.65	0.73	0.86	0.44	0.84	0.88	0.69	0.58	0.62
chr14:23641802:23641939:+@chr14:23642209:23642304:+@chr14:23642559:23643179:+	SE	0.0268698	0.87	0.76	0.81	0.74	0.79	0.72	0.92	0.63	0.8	0.85	0.76	0.77	0.64	0.85	0.56	0.74	0.91	0.68	0.8	0.83	0.75	0.73	0.83	0.54	0.53	0.74	0.9	0.7	0.71	0.74	0.71	0.52	0.6
chr14:23849695:23851084:-@chr14:23849453:23849594:-@chr14:23847525:23847876:-	SE	0.00712371	0.55	0.66	0.35	0.45	0.14	0.41	0.45	0.53	0.75	0.57	0.5	0.35	0.24	0.52	0.74	0.41	0.63	0.55	0.58	0.69	NA	0.16	0.16	0.28	0.41	0.18	0.5	0.39	0.54	0.35	0.41	0.29	0.45
chr14:23979829:23980841:-@chr14:23979538|23979647:23978825:-	A3SS	0.0269081	0.73	0.69	0.64	0.55	0.68	0.62	0.68	0.58	0.81	0.85	0.49	0.47	0.88	0.73	0.39	0.75	0.37	0.47	0.77	0.74	0.62	0.76	0.51	0.57	0.44	0.55	0.47	0.48	0.36	0.57	0.55	0.43	0.6
chr14:30161215:30161356:+@chr14:30164122:30164188:+@chr14:30167166:30167236:+	SE	0.00258706	NA	NA	0.52	0.52	0.44	0.57	0.48	NA	NA	NA	0.67	0.49	0.6	NA	NA	0.55	0.52	NA	0.51	0.55	NA	0.67	0.57	0.68	NA	0.6	NA	0.69	0.55	0.62	0.61	0.57	0.62
chr14:49183761:49183828:-@chr14:49183038:49183162:-@chr14:49179568:49180138:-	SE	0.042197	NA	NA	NA	NA	NA	0.66	NA	NA	NA	NA	0.74	NA	NA	NA	NA	NA	0.68	0.49	0.49	0.7	NA	0.58	0.47	NA	NA	NA	NA	0.45	0.44	NA	NA	NA	NA
chr14:49848479:49849015:-@chr14:49847759:49847901:-@chr14:49839370:49839485:-	SE	0.0375808	NA	NA	NA	0.27	0.08	0.33	0.41	NA	0.22	0.3	0.26	NA	NA	NA	NA	0.18	0.23	0.6	0.19	0.21	NA	0.57	0.41	0.45	NA	0.29	0.59	0.15	0.44	0.62	NA	0.41	0.24
chr14:50096493:50096767:+@chr14:50124299:50124546:+@chr14:50127409:50127543:+	SE	0.0305751	NA	0.7	0.74	0.88	0.84	0.79	0.89	NA	0.88	0.77	0.95	0.83	0.8	0.81	NA	0.88	0.51	NA	0.71	0.8	0.65	0.81	0.81	0.78	0.49	0.85	0.49	0.77	0.76	0.7	NA	0.55	0.76
chr14:50366932:50367175:-@chr14:50358468|50358545:50358342:-	A3SS	0.036982	NA	NA	0.67	NA	0.64	NA	0.66	NA	0.56	NA	0.73	NA	0.52	NA	NA	0.55	0.77	NA	NA	0.66	NA	0.74	NA	NA	NA	0.76	NA	0.81	0.72	NA	NA	NA	NA
chr14:52231836:52232437:-@chr14:52220256:52220375:-@chr14:52218793:52218876:-	SE	0.0339366	0.76	0.79	0.86	0.88	0.83	0.85	0.89	0.5	0.79	0.89	0.89	0.93	0.7	0.95	0.81	0.82	0.73	0.54	0.92	0.9	0.83	0.71	0.87	0.57	0.68	0.83	0.69	0.81	0.88	0.65	0.73	0.56	0.76
chr14:53977715:53977937:-@chr14:53973138:53973253:-@chr14:53972832:53972905:-	SE	0.0396802	NA	0.81	0.79	0.72	0.84	0.71	0.79	0.59	0.36	0.78	0.61	0.64	0.71	0.76	0.7	0.73	0.7	NA	0.82	0.84	0.52	0.79	0.73	0.31	NA	0.63	0.36	0.73	0.76	0.57	0.63	0.56	0.71
chr14:58895868:58895975:+@chr14:58897273:58897333:+@chr14:58900122:58900253:+	SE	0.0123901	NA	NA	0.71	0.55	0.64	NA	0.59	NA	0.64	NA	0.7	0.67	0.67	NA	NA	NA	0.63	NA	0.58	NA	NA	0.58	0.52	0.52	NA	0.56	NA	0.65	0.52	NA	NA	NA	0.55
chr14:60521201:60521274:+@chr14:60556012:60556051:+@chr14:60566916:60567509:+	SE	0.0481204	NA	0.38	NA	0.49	0.44	0.4	0.46	NA	NA	NA	0.56	NA	0.52	0.5	0.48	0.36	NA	0.49	NA	0.41	NA	0.44	NA	0.53	NA	0.57	NA	0.58	0.48	NA	0.49	0.49	0.65
chr14:63161399:63161506:-@chr14:63158167:63158200:-@chr14:63133015:63136444:-	SE	0.0201737	0.45	0.56	0.53	0.36	0.65	0.4	0.56	0.66	0.59	0.57	0.48	0.55	0.42	0.32	0.59	0.42	0.44	0.57	0.53	0.74	0.46	0.23	0.54	0.46	0.51	0.55	0.59	0.43	0.21	0.15	0.41	0.28	0.29
chr14:63559222:63559334:+@chr14:63560728:63560930:+	RI	0.0322443	NA	NA	NA	0.08	0.08	0.07	0.13	NA	0.12	0.09	0.04	0.13	0.12	0.02	NA	0.03	0.28	0.3	0.31	0.05	0.48	0.02	0.14	0.35	NA	0.13	NA	0.09	0.42	0.18	NA	0.53	0.13
chr14:63756908:63757108:+@chr14:63758005|63758047:63758175:+	A3SS	0.0217063	NA	NA	NA	0.71	0.67	0.61	0.65	0.72	0.54	0.74	0.64	0.63	0.73	0.7	NA	0.62	0.75	NA	0.54	0.79	0.59	0.52	0.53	0.47	NA	0.72	0.81	0.61	0.5	0.43	0.57	0.72	0.48
chr14:64580782:64580914:+@chr14:64589709:64589820:+@chr14:64591046:64591160:+	SE	0.0377884	NA	NA	NA	NA	0.58	NA	0.59	NA	0.63	NA	0.8	0.63	NA	NA	NA	0.58	0.61	NA	NA	NA	NA	0.56	0.64	NA	NA	NA	0.54	0.52	NA	NA	0.45	0.53	NA
chr14:69703109:69704954:-@chr14:69597306:69597409:-@chr14:69588460:69588584:-	SE	0.0331991	NA	NA	NA	0.51	0.65	NA	0.43	NA	0.46	NA	0.35	0.53	0.64	0.46	0.5	0.58	NA	NA	NA	0.79	NA	0.39	0.41	NA	NA	0.45	0.42	0.49	0.44	0.39	NA	0.6	0.42
chr14:71160518:71160706:+@chr14:71186760|71186805:71186979:+	A3SS	0.0319214	0.61	0.59	0.79	0.74	0.79	0.73	0.79	NA	0.7	0.81	0.55	0.56	0.27	0.68	NA	0.75	0.58	0.7	0.74	0.73	0.31	0.57	0.72	0.61	0.68	0.65	0.57	0.68	0.59	0.37	0.73	0.64	0.46
chr14:72823571:72823775:-@chr14:72820542:72820826:-@chr14:72818207:72818966:-	SE	0.00787814	0.9	0.88	0.91	0.89	0.86	0.93	0.95	NA	0.95	0.93	0.98	0.94	0.89	0.95	0.77	0.93	0.97	0.71	0.94	0.95	0.91	0.89	0.9	0.93	0.83	0.93	0.77	0.82	0.85	0.87	0.67	0.86	0.87
chr14:72823571:72823775:-@chr14:72820542:72820835:-@chr14:72818207:72818966:-	SE	0.0210175	0.92	0.9	0.92	0.9	0.86	0.93	0.95	NA	0.98	0.94	0.98	0.95	0.88	0.97	0.75	0.94	0.97	0.85	0.96	0.97	0.91	0.91	0.94	0.91	0.85	0.94	0.8	0.86	0.88	0.89	0.76	0.87	0.93
chr14:73413454:73413624:+@chr14:73416511:73416632:+	RI	0.0124133	NA	0.54	0.55	0.32	0.56	0.58	0.4	0.36	0.66	0.68	0.61	0.55	0.55	0.58	NA	0.22	0.48	0.46	0.61	0.31	NA	0.28	0.45	0.37	0.47	0.42	0.52	0.42	0.21	0.48	0.26	0.5	0.28
chr14:73489891:73490025:+@chr14:73491907:73491965:+@chr14:73492261:73493044:+	SE	0.0190441	0.81	NA	NA	0.73	0.85	0.8	0.78	NA	0.72	0.88	0.96	0.87	0.69	0.88	NA	0.78	0.47	0.72	0.52	NA	0.43	0.87	0.8	NA	0.67	0.74	0.41	0.63	0.69	0.71	0.66	0.6	0.6
chr14:74422042:74422090:+@chr14:74425563:74425603:+@chr14:74425731:74426478:+	SE	0.0241385	0.38	NA	0.58	0.48	0.48	0.51	0.62	NA	0.57	0.56	0.49	0.56	0.54	0.51	NA	0.56	0.45	0.52	NA	0.41	0.4	0.58	0.48	NA	0.41	0.35	0.49	0.41	0.41	NA	0.35	0.39	0.56
chr14:74599926:74600017:-@chr14:74592903:74593016:-@chr14:74589677:74590115:-	SE	0.0398948	NA	0.34	0.73	0.38	0.3	0.39	0.65	0.58	0.41	0.71	0.4	0.66	0.46	0.66	0.44	0.46	0.19	0.5	0.45	0.33	0.45	0.34	0.4	0.56	0.19	0.39	0.59	0.23	0.3	0.09	0.26	0.51	0.19
chr14:77358531:77358614:+@chr14:77387239:77387356:+@chr14:77395172:77395375:+	SE	0.0212071	NA	NA	NA	NA	0.35	0.2	0.38	0.34	NA	0.2	0.34	NA	NA	0.14	NA	0.36	NA	NA	0.47	NA	NA	0.57	NA	NA	NA	0.31	0.66	0.55	NA	NA	0.4	0.57	NA
chr14:91473298:91473155|91473044:-@chr14:91431047:91431169:-	A5SS	0.0288556	NA	0.64	0.69	0.39	0.66	0.61	0.63	0.65	0.55	NA	0.64	0.67	0.5	0.79	0.7	0.7	0.66	0.63	NA	0.84	0.72	NA	0.68	0.57	0.53	0.52	NA	0.4	0.36	0.59	NA	0.46	0.51
chr14:93919284:93919331:-@chr14:93918682:93919239:-	RI	0.0232495	0.92	0.95	0.92	0.91	0.96	0.93	0.78	0.31	0.94	0.9	0.98	0.99	0.93	0.99	0.87	0.81	0.94	0.87	0.87	0.99	0.74	0.96	0.85	0.8	0.63	0.94	0.52	0.95	0.91	0.9	0.69	0.66	0.71
chr14:94148387:94148537:+@chr14:94149437|94150524:94151174:+	A3SS	0.0213736	NA	NA	0.35	0.02	0.04	0.16	0.07	NA	NA	NA	0.04	0.08	0.04	NA	NA	0.02	0.03	NA	NA	0.03	0.06	0.04	0.1	0.35	NA	0.1	0.47	0.05	0.1	0.14	0.44	NA	NA
chr14:94148387:94148537:+@chr14:94149437|94150526:94151174:+	A3SS	0.0374606	NA	NA	0.43	0.05	0.12	0.35	0.1	NA	NA	NA	0.06	0.12	0.05	NA	NA	0.05	0.07	NA	NA	0.02	0.08	0.09	0.11	0.39	NA	0.28	0.55	0.34	0.22	0.31	0.27	NA	NA
chr14:94148481:94148533:+@chr14:94149437|94150524:94151174:+	A3SS	0.0481325	NA	NA	0.36	0.03	0.07	0.49	0.07	NA	NA	NA	0.04	0.14	0.05	NA	NA	0.02	0.05	NA	NA	0.02	0.05	0.06	0.13	0.3	NA	0.17	0.68	0.1	0.18	0.23	0.36	NA	NA
chr14:95899554:95899658:+@chr14:95915028:95915149:+@chr14:95915778:95916382:+	SE	0.0271706	NA	0.4	0.48	0.46	NA	0.56	0.37	NA	0.62	NA	0.49	0.46	NA	NA	0.49	0.55	NA	NA	0.61	NA	NA	0.53	0.41	NA	0.37	0.24	NA	0.43	0.44	0.37	0.47	NA	0.44
chr15:20444104:20444222:+@chr15:20477223:20477340:+@chr15:20477417:20477506:+	SE	0.0379872	0.44	0.56	0.49	0.71	0.61	0.7	0.65	NA	0.49	0.51	0.79	0.38	0.65	0.42	0.45	0.62	0.61	0.48	0.49	0.5	0.66	0.66	0.68	0.62	0.63	0.69	0.5	0.75	0.61	0.64	0.64	0.66	0.47
chr15:22881430:22881562:+@chr15:22882750:22882854:+@chr15:22883707:22883839:+	SE	0.042197	NA	NA	0.58	NA	NA	NA	NA	NA	NA	NA	0.54	0.66	NA	NA	NA	0.67	0.56	NA	0.62	NA	NA	0.32	NA	NA	0.57	NA	NA	NA	0.32	NA	0.51	NA	NA
chr15:32304497:32304693:+@chr15:32305008:32305143:+@chr15:32307186:32308082:+	SE	0.00715466	0.84	0.5	0.83	0.8	0.85	0.81	0.8	0.78	0.87	0.9	0.83	0.83	0.65	0.89	0.77	0.85	0.91	NA	0.87	0.86	0.69	0.71	0.77	0.77	0.79	0.93	0.85	0.75	0.64	0.69	0.73	0.61	0.62
chr15:32304497:32304693:+@chr15:32305029:32305143:+@chr15:32307186:32308082:+	SE	0.00596923	0.9	0.54	0.79	0.82	0.86	0.85	0.82	0.82	0.9	0.91	0.85	0.83	0.69	0.93	0.83	0.87	0.94	NA	0.88	0.87	0.71	0.74	0.74	0.82	0.79	0.94	0.81	0.78	0.69	0.68	0.79	0.85	0.61
chr15:32304497:32304693:+@chr15:32305029:32305151:+@chr15:32307186:32308082:+	SE	0.00391927	0.88	0.5	0.83	0.8	0.85	0.84	0.79	0.78	0.87	0.9	0.84	0.82	0.7	0.91	0.8	0.87	0.91	NA	0.87	0.87	0.76	0.71	0.71	0.78	0.8	0.94	0.79	0.76	0.68	0.66	0.77	0.8	0.6
chr15:32304497:32304693:+@chr15:32305057:32305143:+@chr15:32307186:32308082:+	SE	0.00262037	0.85	0.61	0.9	0.82	0.88	0.82	0.75	NA	0.88	0.88	0.81	0.78	0.62	0.89	0.77	0.85	0.89	NA	0.8	0.77	0.55	0.71	0.74	0.85	0.74	0.88	0.57	0.75	0.7	0.63	0.68	0.75	0.39
chr15:39139357:39139416:-@chr15:39138129:39138271:-@chr15:39136112:39136196:-	SE	0.0444773	NA	NA	NA	0.56	0.68	0.49	0.51	NA	NA	NA	0.63	0.62	NA	0.53	NA	0.46	NA	NA	0.57	0.52	NA	0.4	0.47	NA	NA	0.56	0.52	0.43	0.48	NA	NA	NA	NA
chr15:39601588:39601740:-@chr15:39601228:39601370:-@chr15:39598683:39600637:-	SE	0.035665	NA	NA	NA	0.6	0.56	0.46	0.68	0.64	0.61	0.52	0.87	NA	NA	0.53	NA	0.59	0.71	NA	0.45	0.38	NA	0.77	0.83	NA	NA	0.68	0.69	0.75	0.49	0.72	NA	NA	NA
chr15:39892006:39892591:+@chr15:39893111:39893271:+	RI	0.034123	NA	NA	NA	NA	0.25	NA	0.13	NA	NA	NA	0.25	0.21	NA	0.09	NA	0.23	NA	NA	NA	0.13	NA	0.44	0.28	NA	NA	0.26	NA	0.14	0.4	NA	NA	NA	NA
chr15:39892006:39892591:+@chr15:39893111:39893271:+@chr15:39894749:39895289:+	SE	0.00898835	NA	NA	0.69	0.66	0.81	0.68	0.83	NA	0.69	0.49	0.78	0.86	0.8	0.79	0.64	0.82	0.83	0.77	0.33	0.84	0.56	0.59	0.58	NA	NA	0.7	NA	0.79	0.62	0.58	0.65	0.53	0.46
chr15:40249356:40249214|40249210:-@chr15:40246884:40247027:-	A5SS	0.0415272	NA	NA	NA	0.47	0.86	0.76	0.81	NA	0.6	0.84	0.9	0.77	NA	0.84	NA	0.67	0.84	NA	NA	0.81	NA	0.71	0.56	NA	NA	0.71	NA	0.67	0.77	0.67	NA	NA	0.48
chr15:41825882:41826196:+@chr15:41833314:41833392:+@chr15:41836139:41836256:+	SE	0.0267422	0.91	0.87	0.81	0.9	0.92	0.79	0.83	0.61	0.93	0.95	0.92	0.94	0.9	0.96	0.92	0.95	0.88	0.63	0.78	0.91	0.85	0.86	0.73	0.63	0.56	0.87	0.58	0.84	0.9	0.92	0.8	0.9	0.86
chr15:41852794:41852838:-@chr15:41852713|41852716:41852107:-	A3SS	0.024538	0.43	0.34	0.57	0.61	0.32	0.77	0.51	0.72	0.63	0.51	0.8	0.4	0.6	0.47	0.44	0.65	0.66	0.61	0.53	0.55	0.4	0.9	0.86	0.58	0.46	0.7	0.54	0.77	0.74	0.83	0.75	0.63	0.74
chr15:42652173:42652310:-@chr15:42650015:42650148:-@chr15:42646828:42647082:-	SE	0.0435126	0.56	0.52	0.69	0.78	0.82	0.64	0.85	NA	0.9	0.72	0.92	0.78	0.85	0.78	NA	0.9	0.81	NA	0.82	0.88	0.67	0.78	0.83	0.45	0.25	0.86	NA	0.59	0.57	0.83	0.59	0.77	0.52
chr15:42794913:42795195|42795191:+@chr15:42795819:42797634:+	A5SS	0.0288385	0.17	0.1	0.19	0.17	0.13	0.16	0.17	0.14	0.06	0.09	0.15	0.09	0.13	0.07	0.18	0.15	0.1	0.13	0.07	0.1	0.17	0.16	0.16	0.16	0.13	0.14	0.16	0.15	0.15	0.14	0.18	0.18	0.19
chr15:48276989:48277198:+@chr15:48277724:48277971:+@chr15:48281976:48282134:+	SE	0.0272114	NA	0.05	0.12	0.06	0.02	0.01	0.03	0.39	0.01	0.03	0	0.02	0.09	0.01	0.08	0.03	0.06	NA	0.04	0.05	0.12	0.01	0.1	0.4	0.36	0.04	0.25	0.03	0.09	0.07	NA	0.11	0.05
chr15:48503867:48504003:+@chr15:48511827:48511988:+@chr15:48518498:48518666:+	SE	0.0234974	0.62	0.43	0.22	0.15	0.06	0.18	0.2	NA	0.06	0.54	0.16	0.11	0.36	0.46	0.25	0.23	0.6	0.61	0.32	0.41	0.07	0.09	0.15	0.16	0.19	0.23	0.13	0.09	0.18	0.13	0.24	0.39	0.12
chr15:50201705:50202244:-@chr15:50200421:50201704:-	TandemUTR	0.0202422	NA	NA	0.66	0.68	0.8	0.48	0.72	0.67	0.41	0.74	0.79	0.75	0.55	0.54	NA	0.8	0.6	NA	0.78	0.23	0.53	0.49	0.47	0.71	0.36	0.46	0.63	0.69	0.45	0.39	0.44	NA	0.6
chr15:50608269:50608544:-@chr15:50606402:50606503:-@chr15:50512664:50512774:-	SE	0.019602	NA	0.73	NA	0.63	0.81	NA	0.73	NA	NA	NA	0.75	NA	0.68	NA	NA	0.68	NA	NA	NA	NA	0.6	0.56	0.56	0.38	NA	0.71	0.45	0.74	0.58	NA	0.66	NA	NA
chr15:53994774:53996794:-@chr15:53951905:53951966:-@chr15:53949069:53949171:-	SE	0.041881	0.43	0.46	0.5	0.54	0.44	0.47	0.4	NA	NA	NA	0.56	0.54	0.42	0.44	0.42	0.34	NA	0.55	0.5	0.45	0.43	0.66	0.56	NA	0.6	0.53	NA	0.54	0.45	0.67	0.56	0.42	NA
chr15:56980751:56980778:-@chr15:56978960:56979374:-@chr15:56978294:56978343:-	SE	0.0387452	0.48	0.51	0.4	0.61	0.61	0.47	0.37	0.53	0.52	0.58	0.39	0.54	0.5	0.61	0.61	0.48	0.52	0.49	0.46	0.55	0.45	0.42	0.55	0.41	0.5	0.49	0.48	0.44	0.36	0.46	0.41	0.43	0.58
chr15:57011934:57011853|57011847:-@chr15:56996065:56996490:-	A5SS	0.022592	NA	NA	NA	0.51	0.37	0.52	0.59	NA	0.79	NA	0.67	NA	0.75	0.5	0.57	0.6	NA	NA	0.5	0.53	NA	0.49	0.5	0.46	0.39	0.47	NA	0.7	0.44	NA	NA	NA	0.44
chr15:58477434:58477534:-@chr15:58461833:58461932:-@chr15:58443920:58444014:-	SE	0.0133874	NA	0.46	0.4	0.38	0.48	0.48	NA	NA	0.46	0.54	0.38	0.55	0.52	0.38	0.54	0.38	NA	NA	0.54	0.44	0.55	0.47	0.56	0.6	NA	0.6	NA	0.53	0.49	0.45	0.58	0.53	0.51
chr15:61121443:61122195:+@chr15:61122958|61123328:61123404:+	A3SS	0.00538031	0.59	0.71	0.64	0.67	0.61	0.59	0.92	0.89	0.39	0.83	0.49	0.63	0.42	0.73	0.72	0.97	0.81	0.51	0.65	0.63	0.95	0.53	0.91	0.84	0.95	0.78	0.86	0.91	0.83	0.75	0.89	0.75	0.77
chr15:61121443:61122195:+@chr15:61122958|61123375:61123404:+	A3SS	0.0220734	0.57	0.7	0.6	0.89	0.93	0.92	0.97	0.92	0.59	0.66	0.94	0.67	0.81	0.78	0.76	1	0.83	0.68	0.68	0.66	0.93	0.96	0.9	0.88	0.95	0.93	0.88	0.98	0.93	0.89	0.93	0.72	0.74
chr15:61134957:61136370:+@chr15:61140121:61140191:+@chr15:61140965:61141040:+	SE	0.0419189	NA	0.45	0.62	0.35	0.71	0.89	0.92	0.48	0.64	0.55	0.75	0.5	0.55	0.4	0.41	0.98	0.38	0.34	0.48	0.46	0.83	0.91	0.57	0.53	0.85	0.8	0.54	0.9	0.83	0.85	0.84	0.44	0.52
chr15:61424871:61424729|61424725:-@chr15:61421254:61421349:-	A5SS	0.0294209	NA	NA	NA	0.62	0.76	0.79	0.75	NA	0.83	0.75	0.96	NA	0.58	NA	NA	0.71	0.77	NA	0.78	0.74	0.68	0.8	NA	0.55	0.55	0.83	0.48	0.73	NA	0.36	NA	0.51	0.59
chr15:61583763:61584082:+@chr15:61642147:61642260:+@chr15:61649685:61649831:+	SE	0.0311758	0.71	0.52	NA	0.72	0.38	0.54	0.56	NA	0.61	NA	0.46	0.7	0.61	NA	NA	0.64	0.54	NA	0.6	0.45	NA	0.46	0.58	0.45	NA	0.53	0.3	0.43	0.45	NA	NA	0.56	NA
chr15:62191825:62191936:+@chr15:62202755:62202798:+@chr15:62205331:62205472:+	SE	0.0469062	NA	0.56	NA	0.55	0.53	0.64	NA	NA	0.53	NA	0.73	NA	0.52	NA	NA	0.53	NA	NA	NA	NA	NA	0.5	NA	NA	0.34	NA	NA	NA	0.27	0.45	0.6	NA	NA
chr15:62191825:62191936:+@chr15:62202755:62202802:+@chr15:62205331:62205472:+	SE	0.010101	NA	0.74	NA	0.67	NA	0.59	NA	NA	0.57	NA	0.7	NA	0.53	NA	NA	0.51	NA	NA	NA	NA	NA	0.54	NA	NA	0.35	NA	NA	NA	0.44	0.47	0.45	NA	NA
chr15:63543152:63543297:-@chr15:63535616:63535762:-@chr15:63533654:63533806:-	SE	0.0331349	0.5	0.58	0.62	0.77	0.75	0.66	0.81	NA	0.83	0.64	0.88	0.91	0.76	0.71	0.63	0.85	0.71	0.72	0.79	0.8	0.75	0.86	0.75	0.15	0.59	0.6	NA	0.67	0.61	0.46	0.57	0.7	0.67
chr15:67493545:67494421:-@chr15:67480366:67480420:-@chr15:67476297:67477141:-	SE	0.0292346	NA	NA	0.48	0.36	0.6	0.58	0.48	0.4	0.44	NA	0.33	NA	NA	0.48	0.43	0.61	0.35	0.49	0.48	NA	0.5	0.49	0.55	0.51	NA	0.51	NA	0.62	0.6	NA	0.7	0.38	NA
chr15:68137684:68137552|68137543:-@chr15:68136852:68137051:-	A5SS	0.0148184	NA	NA	0.53	0.75	0.46	0.64	0.82	0.72	0.77	0.75	0.84	0.9	NA	0.88	NA	0.64	0.86	NA	NA	0.68	NA	0.59	0.56	NA	NA	0.46	0.63	0.72	0.44	NA	NA	NA	NA
chr15:70286123:70286290:-@chr15:70282417:70282583:-@chr15:70281849:70282015:-@chr15:70279869:70280050:-	MXE	0.0344763	0.08	0.06	0.04	0.03	0.02	0.04	0.06	0.04	0.02	0.02	0.01	0.04	0.03	0.02	0.03	0.11	0.05	0.16	0.01	0.02	0.14	0.07	0.05	0.13	0.15	0.05	0.05	0.04	0.12	0.01	0.08	0.03	0.04
chr15:70434954:70435019:-@chr15:70433082:70433132:-@chr15:70432463:70432573:-	SE	0.0217378	NA	0.65	0.54	0.49	0.45	0.54	0.55	0.64	0.44	NA	0.41	0.54	NA	0.56	0.58	0.38	0.48	NA	NA	0.53	NA	0.52	0.44	NA	NA	0.51	0.5	0.38	0.32	NA	NA	0.39	0.43
chr15:72064712:72068651:-@chr15:72064053:72064262:-@chr15:72062595:72063524:-	SE	0.00797645	NA	NA	0.54	0.71	0.94	0.93	0.87	0.72	0.82	0.91	0.95	0.91	0.71	0.94	NA	0.83	0.91	NA	0.91	0.87	0.73	0.84	0.74	0.61	NA	0.82	0.79	0.79	0.72	0.72	0.48	0.75	0.4
chr15:72064712:72068651:-@chr15:72064053:72064265:-@chr15:72062595:72063524:-	SE	0.0033686	NA	NA	0.68	0.75	0.93	0.89	0.89	0.51	0.86	0.91	0.93	0.91	0.66	0.89	NA	0.88	0.86	NA	0.86	0.89	0.59	0.87	0.76	0.55	NA	0.7	0.72	0.8	0.7	0.66	0.48	0.81	0.54
chr15:72881907:72882290:+@chr15:72882291:72882574:+	TandemUTR	0.0142	0.38	0.64	0.6	0.84	0.46	0.83	0.43	0.11	0.82	0.89	0.62	0.9	0.87	0.9	0.47	0.78	0.81	0.76	0.69	0.72	0.38	0.59	0.38	0.56	0.56	0.68	0.1	0.63	0.32	0.68	0.65	0.57	0.68
chr15:72969401:72969483:+@chr15:72969950:72970048:+@chr15:72970773:72970973:+	SE	0.0301647	0.72	0.79	NA	NA	0.82	0.85	0.77	NA	0.72	0.74	0.87	0.79	0.73	0.83	NA	0.82	0.85	NA	0.75	0.75	NA	0.78	0.69	0.6	NA	0.87	0.6	0.79	0.69	0.76	0.3	NA	0.59
chr15:73417749:73417814|73417781:+@chr15:73418040:73419272:+	A5SS	0.0304473	NA	NA	0.46	0.38	0.68	0.37	0.45	NA	0.44	0.49	0.4	0.5	0.38	0.56	0.53	0.47	0.54	NA	0.46	0.51	NA	0.64	0.57	NA	NA	0.47	0.47	0.52	0.55	0.55	0.44	0.59	0.57
chr15:73418379:73419272|73418498:+@chr15:73419359:73419671:+	A5SS	0.00752848	0.35	0.55	0.24	0.15	0.2	0.25	0.22	0.14	0.51	0.31	0.21	0.25	0.17	0.31	0.48	0.38	0.52	0.39	0.53	0.69	0.08	0.18	0.21	0.09	0.06	0.27	0.29	0.15	0.28	0.07	0.48	0.13	0.24
chr15:73418379:73419272|73418738:+@chr15:73419359:73419671:+	A5SS	0.0142406	0.61	0.44	0.41	0.36	0.53	0.66	0.57	0.39	0.79	0.55	0.5	0.69	0.31	0.76	0.59	0.77	0.86	0.58	0.75	0.93	0.21	0.46	0.47	0.41	0.16	0.61	0.57	0.4	0.72	0.21	0.56	0.43	0.31
chr15:73426344:73426867:+@chr15:73427353:73427393:+@chr15:73428278:73429055:+	SE	0.0458511	NA	NA	NA	0.55	0.7	0.5	0.48	0.71	0.72	NA	0.4	NA	0.45	0.4	0.45	0.23	0.29	NA	0.48	NA	NA	0.56	0.6	NA	NA	0.67	0.75	0.63	0.55	0.72	NA	0.45	NA
chr15:75150289:75150568:-@chr15:75135461:75135652:-@chr15:75133575:75133676:-	SE	0.0403835	0.91	0.75	0.93	0.92	0.89	0.84	0.95	0.86	0.96	0.97	0.94	0.97	0.82	0.96	0.44	0.96	0.96	0.62	0.96	0.97	0.77	0.87	0.93	0.85	0.78	0.95	0.87	0.9	0.88	0.83	0.6	0.92	0.82
chr15:80338484:80338551:-@chr15:80332087:80332171:-@chr15:80320666:80320799:-	SE	0.0137853	0.62	NA	NA	NA	NA	0.63	NA	NA	NA	0.59	0.65	0.66	NA	NA	NA	0.57	NA	0.51	0.56	NA	0.5	0.59	0.51	0.56	0.51	0.58	0.47	0.44	0.52	NA	NA	NA	NA
chr15:86983578:86983829:+@chr15:86994470|86996345:86996545:+	A3SS	0.0400311	0.05	0.04	0.07	0.19	0.01	0.01	0.1	0.15	0.05	0.03	0.08	0.01	0.03	0.02	0.02	0.04	0.04	0.2	0.03	0.02	0.17	0.02	0.03	0.11	0.15	0.12	0.17	0.02	0.12	0.08	0.11	0.12	0.08
chr15:87432385:87432798:+@chr15:87457960:87458059:+@chr15:87460557:87460756:+	SE	0.0498816	0.83	0.67	0.91	0.9	0.98	0.9	0.95	0.89	0.93	0.97	0.92	0.96	0.67	0.94	0.61	0.93	0.95	NA	0.95	0.94	0.59	0.89	0.93	0.88	0.72	0.95	0.92	0.86	0.92	0.85	0.75	0.88	0.87
chr15:88034812:88035016:-@chr15:88030666:88030781:-@chr15:88025766:88028183:-	SE	0.00596092	0.61	0.74	0.61	0.85	0.61	0.77	0.61	0.78	0.69	0.89	0.65	0.64	0.7	0.88	0.6	0.56	0.8	0.57	0.81	0.78	0.48	0.55	0.67	0.61	0.48	0.47	0.66	0.5	0.86	0.31	0.32	0.62	0.63
chr15:88034812:88035016:-@chr15:88030672:88030781:-@chr15:88025766:88028183:-	SE	0.00792624	0.49	0.56	0.6	0.78	0.55	0.58	0.58	0.59	0.59	0.84	0.54	0.57	0.66	0.88	0.63	0.43	0.74	0.57	0.58	0.81	0.47	0.43	0.55	0.63	0.39	0.33	0.51	0.41	0.82	0.18	0.31	0.56	0.66
chr15:88575331:88575449:-@chr15:88575170:88575258:-	RI	0.0335042	0.45	0.67	0.46	0.59	0.75	0.71	0.78	0.72	0.8	0.84	0.88	0.79	0.68	0.76	NA	0.79	0.8	NA	0.8	0.82	0.55	0.79	0.76	0.66	0.57	0.8	0.66	0.71	0.7	0.65	0.54	0.66	0.56
chr15:92575772:92575897:+@chr15:92622387:92622496:+@chr15:92642434:92642963:+	SE	0.0407704	0.27	0.29	0.57	0.21	0.27	0.32	0.35	0.41	0.23	0.25	0.28	0.29	0.38	0.62	0.3	0.37	0.39	0.46	0.62	0.79	0.35	0.41	0.49	0.12	0.4	0.51	0.87	0.51	0.6	0.44	0.52	0.53	0.45
chr15:93671063:93671361:-@chr15:93633655:93633787:-@chr15:93632535:93632701:-	SE	0.0275319	NA	NA	NA	NA	0.75	NA	NA	NA	NA	NA	0.58	NA	NA	NA	NA	0.64	NA	NA	NA	NA	NA	0.56	0.44	NA	NA	0.39	0.39	0.55	0.51	NA	NA	NA	NA
chr15:97718725:97719239:+@chr15:97720834:97720993:+@chr15:97743758:97747737:+	SE	0.0141757	0.77	0.81	0.81	0.53	0.91	0.65	0.45	0.3	0.81	0.92	0.88	0.9	0.8	0.92	0.44	0.69	0.84	0.39	0.82	0.87	0.57	0.65	0.76	0.77	0.68	0.77	0.36	0.6	0.57	0.43	0.22	0.69	0.6
chr15:98047969:98048156:+@chr15:98061090:98061113:+@chr15:98064457:98064606:+	SE	0.00516108	0.56	0.66	0.76	0.69	0.77	0.67	0.69	NA	0.63	0.88	0.66	0.73	0.26	0.83	0.59	0.86	0.63	NA	0.75	0.8	0.71	0.58	0.44	0.54	NA	0.58	0.58	0.75	0.54	0.57	0.46	0.61	0.64
chr16:10906102:10906170:+@chr16:10910341:10910545:+@chr16:10911546:10911617:+	SE	0.0349523	0.64	NA	NA	0.49	NA	NA	0.47	0.43	0.65	NA	0.53	0.56	0.56	0.48	NA	0.49	NA	NA	NA	0.57	NA	0.47	0.44	NA	NA	NA	NA	NA	0.38	NA	NA	NA	NA
chr16:11557868:11558092:-@chr16:11554890:11555046:-@chr16:11549079:11551102:-	SE	0.0134263	0.75	0.5	0.84	0.63	0.67	0.89	0.62	0.36	0.92	0.92	0.63	0.94	0.61	0.9	0.86	0.76	0.92	0.66	0.93	0.93	0.73	0.7	0.56	0.57	0.63	0.6	0.89	0.65	0.56	0.42	0.73	0.49	0.63
chr16:12782543:12782761:-@chr16:12705982:12706407:-@chr16:12661157:12666473:-	SE	0.0148436	0.89	0.81	0.88	0.89	0.96	0.88	0.91	0.79	0.91	0.96	0.93	0.98	0.92	0.95	0.84	0.91	0.97	0.41	0.92	0.93	0.87	0.92	0.95	0.78	0.68	0.87	0.76	0.84	0.92	0.82	0.77	0.83	0.81
chr16:1341002:1340813|1340809:-@chr16:1340060:1340236:-	A5SS	0.0108598	NA	NA	0.75	0.75	0.81	0.76	0.81	0.82	0.79	0.68	0.85	0.9	0.61	0.85	NA	0.74	0.8	NA	0.83	0.81	0.53	0.81	0.71	0.72	NA	0.78	0.77	0.76	0.74	0.67	NA	0.58	0.68
chr16:14976334:14976578:+@chr16:14985877|14985901:14986016:+	A3SS	0.049746	NA	NA	NA	NA	NA	NA	0.55	NA	NA	NA	NA	NA	NA	NA	0.51	0.62	NA	NA	NA	NA	NA	0.63	0.75	NA	NA	0.75	NA	NA	NA	NA	NA	NA	0.65
chr16:15695523:15695614:+@chr16:15701087:15701212:+@chr16:15725549:15727858:+	SE	0.0295305	0.59	0.56	0.36	0.34	0.28	0.39	0.15	0.25	0.46	0.39	0.36	0.35	0.45	0.35	0.42	0.08	0.34	0.49	0.46	0.49	0.16	0.15	0.33	0.41	0.25	0.19	0.21	0.18	0.18	0.33	0.18	0.47	0.56
chr16:15721509:15721670:-@chr16:15721065|15721071:15720943:-	A3SS	0.029476	0.7	0.49	0.72	0.74	0.81	0.86	0.98	0.9	0.73	0.64	0.93	0.84	0.73	0.94	0.84	1	0.84	0.75	0.78	0.78	0.97	0.91	0.92	0.85	0.95	0.94	0.86	0.94	0.95	0.81	0.97	0.7	0.78
chr16:15721670:15721509|15721505:-@chr16:15720943:15721071:-	A5SS	0.0142081	0.64	0.41	0.73	0.56	0.53	0.8	0.93	0.8	0.47	0.63	0.78	0.72	0.55	0.94	0.67	0.91	0.64	0.69	0.59	0.61	0.94	0.77	0.85	0.79	0.92	0.8	0.73	0.86	0.93	0.72	0.88	0.49	0.81
chr16:15722780:15722992:-@chr16:15722197:15722409:-	RI	0.029677	0.03	0.02	0.01	0.01	0.01	0.02	0	0.01	0.04	0.01	0	0.01	0.04	0.01	0.06	0	0.02	0.01	0.05	0.01	0	0.01	0.01	0.02	0	0	0	0	0.01	0.01	0	0.02	0.01
chr16:16329094:16329713|16329556:+@chr16:16330009:16330165:+	A5SS	0.0223084	NA	0.69	0.53	0.68	0.46	0.7	0.59	0.64	0.58	0.76	0.59	0.22	0.36	0.48	0.71	0.44	0.46	0.6	0.78	0.69	0.62	0.71	0.61	0.72	0.72	0.7	0.92	0.77	0.64	0.73	0.41	0.87	0.59
chr16:16335005:16335242|16335121:+@chr16:16337410:16337495:+	A5SS	0.0217393	NA	NA	NA	0.48	0.57	0.57	0.49	0.5	0.52	NA	0.56	0.56	0.52	0.4	NA	0.53	0.49	NA	0.42	0.5	0.51	0.62	0.51	NA	0.72	0.61	0.62	0.57	NA	0.51	NA	NA	NA
chr16:1761271:1761412:-@chr16:1761072:1761173:-	RI	0.0135747	NA	NA	NA	0.7	0.75	0.38	0.77	0.71	NA	0.82	0.88	NA	NA	NA	NA	0.67	0.57	NA	NA	0.73	NA	0.49	0.47	NA	NA	0.35	0.61	0.65	0.63	0.64	NA	NA	NA
chr16:1761282:1761563:-@chr16:1761173|1761193:1761072:-	A3SS	0.0147482	NA	NA	0.65	0.52	0.65	0.41	0.5	0.85	NA	0.65	0.5	0.68	NA	NA	NA	0.46	0.8	NA	NA	NA	NA	0.42	0.52	0.41	NA	0.62	0.56	0.36	0.34	0.42	NA	NA	0.4
chr16:180135:179968|179931:-@chr16:178454:179339:-	A5SS	0.0171447	NA	NA	0.33	0.44	0.49	0.35	0.53	0.58	0.51	0.37	0.5	0.66	0.39	0.55	0.32	0.36	0.36	0.22	0.44	0.4	0.38	0.38	0.48	0.54	0.39	0.73	0.78	0.49	0.53	0.58	0.72	0.57	0.65
chr16:18990607:18990929:+@chr16:18992744:18992858:+@chr16:18994544:18994743:+	SE	0.034563	NA	NA	0.81	0.66	0.71	0.93	0.89	0.53	0.76	0.88	0.83	0.78	0.54	0.86	NA	0.77	0.94	NA	0.94	0.79	0.75	0.77	0.6	0.67	NA	0.8	0.82	0.63	0.69	0.79	0.64	0.75	0.41
chr16:18990607:18990929:+@chr16:18992744:18992920:+@chr16:18994544:18994743:+	SE	0.0128056	NA	NA	0.84	0.62	0.75	0.9	0.9	0.84	0.84	0.9	0.79	0.85	0.41	0.86	NA	0.77	0.85	NA	0.93	0.78	0.7	0.71	0.7	0.73	NA	0.83	0.89	0.63	0.7	0.78	0.62	0.83	0.36
chr16:1954278:1954808:-@chr16:1953655:1953841:-@chr16:1952499:1953258:-	SE	0.0232495	0.14	0.12	0.19	0.26	0.06	0.07	0.09	0.16	0.08	0.06	0.07	0.03	0.15	0.02	0.08	0.1	0.08	0.26	0.03	0.11	0.15	0.06	0.1	0.24	0.21	0.1	0.21	0.05	0.22	0.16	0.3	0.42	0.2
chr16:1954451:1954828:-@chr16:1953655:1954367:-@chr16:1952499:1953258:-	SE	0.0231686	0.18	0.31	0.12	0.53	0.22	0.24	0.21	0.22	0.01	0	0.13	0.01	0.25	0.01	0.16	0.15	0.01	0.1	0.02	0.01	0.36	0.33	0.14	0.1	0.14	0.16	0.03	0.43	0.52	0.37	0.19	0.36	0.42
chr16:20751826:20751946:+@chr16:20758578:20758682:+@chr16:20759154:20759291:+	SE	0.0268436	NA	NA	NA	0.62	0.6	NA	0.55	NA	NA	NA	0.56	NA	NA	NA	NA	NA	NA	NA	0.48	NA	NA	0.67	0.63	NA	NA	0.64	NA	NA	NA	0.62	NA	NA	NA
chr16:21092832:21092970:+@chr16:21095959:21096149:+@chr16:21097619:21097754:+@chr16:21098297:21099438:+	MXE	0.0474352	0.3	0.31	0.2	0.12	0.1	0.12	0.14	0.35	0.12	0.19	0.06	0.31	0.15	0.41	0.41	0.13	0.25	NA	0.12	0.39	0.34	0.08	0.35	0.44	0.44	0.23	0.48	0.19	0.12	0.15	0.44	0.37	0.44
chr16:21926943:21927229:+@chr16:21983160:21983260:+@chr16:21994309:21995545:+	SE	0.0175247	0.69	0.6	0.51	0.45	0.56	0.81	0.49	0.66	0.64	0.61	0.59	0.57	0.21	0.78	0.69	0.51	0.84	0.58	0.24	0.55	0.67	0.45	0.46	0.41	0.36	0.53	NA	0.44	0.49	0.66	0.48	0.47	0.37
chr16:2198212:2198336:+@chr16:2198452:2198615:+	RI	0.042197	NA	NA	NA	NA	0.41	NA	0.27	NA	NA	NA	0.29	NA	NA	0.59	NA	0.37	0.41	NA	NA	NA	NA	0.49	NA	NA	NA	0.46	0.6	0.66	NA	NA	NA	NA	NA
chr16:22252522:22252847:+@chr16:22252848:22253265:+	TandemUTR	0.0343898	NA	0.59	0.65	0.61	0.57	0.6	0.63	NA	0.46	0.69	0.58	0.22	0.59	0.69	NA	0.8	0.58	NA	0.68	0.24	0.58	0.35	0.6	0.5	0.62	0.45	NA	0.43	0.5	0.3	0.44	0.42	0.6
chr16:23559932:23560179:-@chr16:23557281:23557414:-@chr16:23556892:23556951:-	SE	0.0257845	NA	NA	NA	NA	0.36	0.32	0.42	0.38	NA	0.7	0.05	NA	0.26	NA	NA	0.2	NA	NA	0.62	NA	NA	0.2	0.12	NA	NA	0.14	0.2	0.17	0.27	NA	NA	0.19	NA
chr16:23608316:23608594|23608498:+@chr16:23608682:23609189:+	A5SS	0.000659488	NA	NA	0.43	0.47	0.74	0.33	0.82	NA	0.69	0.44	0.47	0.59	0.54	NA	NA	0.72	0.31	NA	0.55	0.55	NA	0.37	0.25	NA	NA	0.42	0.43	0.29	0.27	0.37	NA	0.25	0.23
chr16:24695755:24696180:+@chr16:24697166:24697290:+@chr16:24708054:24710639:+	SE	0.0339217	0.4	0.16	0.28	0.12	0.13	0.28	0.19	0.57	0.4	0.46	0.08	0.17	0.34	0.14	0.14	0.11	0.14	0.27	0.16	0.18	0.37	0.15	0.46	0.3	0.15	0.24	0.56	0.3	0.26	0.37	0.25	0.46	0.6
chr16:2510771:2511125:+@chr16:2517575:2517617:+@chr16:2517775:2518150:+	SE	0.0306361	0.53	0.53	0.66	0.86	0.7	0.69	0.48	0.55	0.25	0.83	0.83	0.61	0.56	0.8	0.55	0.61	0.56	0.61	0.59	0.56	0.6	0.85	0.75	NA	NA	0.72	0.81	0.73	0.7	NA	NA	NA	NA
chr16:2518454:2518720|2518561:+@chr16:2518996:2519867:+	A5SS	0.042045	NA	0.57	0.59	0.72	0.48	0.7	0.72	0.62	0.79	0.59	0.64	0.7	0.58	0.6	NA	0.43	0.57	NA	NA	0.39	NA	0.91	0.79	NA	NA	0.58	0.74	0.79	0.6	NA	NA	NA	NA
chr16:27232732:27232842:+@chr16:27248888:27249020:+@chr16:27259008:27259095:+	SE	0.00870716	NA	0.61	NA	0.46	0.68	0.52	0.56	NA	0.52	0.58	0.57	0.5	0.48	0.56	NA	0.53	0.5	NA	0.5	NA	0.44	0.43	NA	NA	0.53	0.43	0.4	0.49	0.41	0.5	NA	0.54	NA
chr16:27567426:27567557:+@chr16:27573430:27573558:+@chr16:27596551:27596818:+	SE	0.0250381	NA	0.29	0.39	0.51	0.39	0.68	0.24	NA	0.41	0.18	0.55	0.8	0.39	0.1	NA	0.53	0.3	0.68	0.4	0.35	0.5	0.7	0.69	0.71	0.46	0.33	0.82	0.37	0.69	0.51	0.43	0.63	0.56
chr16:28763052:28763156:-@chr16:28762772:28762923:-	RI	0.0344145	NA	NA	0.52	0.55	0.51	0.22	0.43	0.33	0.36	0.43	0.26	0.18	0.42	0.65	NA	0.27	0.38	NA	0.26	0.64	0.72	0.29	0.42	0.75	NA	0.66	0.6	0.58	0.48	0.47	0.48	0.42	0.48
chr16:2886354:2886610:+@chr16:2886686:2886773:+	RI	0.0383672	NA	NA	0.68	0.85	0.8	0.82	0.73	0.62	0.82	0.88	0.84	0.83	0.61	0.79	0.68	0.58	0.53	NA	0.41	0.86	0.46	0.7	0.79	NA	NA	0.72	0.62	0.69	0.5	0.71	0.38	0.49	0.67
chr16:2967033:2966666|2966662:-@chr16:2965321:2965814:-	A5SS	0.0377884	NA	NA	NA	NA	0.35	0.21	0.45	NA	NA	0.27	0.4	NA	NA	NA	NA	NA	0.27	NA	NA	0.28	NA	0.62	0.33	NA	NA	0.29	0.63	0.55	NA	0.62	NA	NA	NA
chr16:29739240:29739332:+@chr16:29743749:29743842:+@chr16:29749337:29749496:+	SE	0.00740729	0.27	0.05	0.42	0.62	0.25	0.4	0.74	0.71	0.36	0.46	0.29	0.2	0.25	NA	0.23	0.32	0.34	NA	0.25	0.65	0.13	0.19	0.55	0.24	NA	0.34	NA	0.25	0.14	0.1	0.12	0.22	0.11
chr16:29739240:29739332:+@chr16:29749296|29749337:29749496:+	A3SS	0.0298836	0.54	0.2	0.69	0.72	0.4	0.3	0.61	NA	0.49	NA	0.42	0.54	0.69	0.61	0.22	0.33	0.39	NA	0.48	0.76	0.33	0.28	0.46	0.35	0.6	0.39	NA	0.4	0.38	0.28	0.36	0.31	0.24
chr16:29752757:29753219|29752888:+@chr16:29754526:29754620:+	A5SS	0.0318737	NA	NA	0.17	0.06	0.02	0.01	0.01	0.24	0.01	0	0	0.02	0.01	0.01	0.28	0.02	0.01	0.52	0.02	0.01	0.32	0.02	0.02	0.49	NA	0.01	0.13	0.03	0.35	0.05	0.14	0.05	0.03
chr16:29781637:29782567:-@chr16:29781408:29781457:-@chr16:29779403:29780081:-	SE	0.0472349	0.74	0.55	0.72	0.51	0.69	0.7	0.74	0.73	0.73	0.8	0.81	0.76	0.63	0.73	0.57	0.77	0.77	NA	NA	0.78	0.46	0.8	0.48	0.64	0.69	0.72	0.6	0.85	0.44	0.69	0.68	0.59	0.59
chr16:29919751:29919862:+@chr16:29920034|29920236:29920352:+	A3SS	0.0398638	NA	NA	NA	NA	0.54	0.3	0.35	NA	0.29	NA	0.34	0.47	NA	0.45	NA	0.15	0.16	NA	0.44	0.66	NA	0.35	0.56	NA	NA	0.35	0.52	0.48	0.48	0.57	NA	0.6	0.53
chr16:30394335:30394402:+@chr16:30397913:30398030:+@chr16:30400261:30400406:+	SE	0.0189429	NA	NA	NA	0.54	0.55	NA	NA	NA	NA	NA	0.55	0.6	NA	NA	NA	NA	NA	NA	NA	NA	NA	0.3	NA	0.53	NA	0.51	NA	0.46	0.51	NA	NA	NA	NA
chr16:30394335:30394402:+@chr16:30400261:30400406:+@chr16:30402649:30402781:+	SE	0.020179	NA	NA	NA	0.62	0.58	0.58	0.66	NA	NA	NA	0.59	0.48	0.38	0.5	NA	NA	0.62	0.54	NA	0.48	NA	0.46	0.44	0.44	NA	NA	NA	0.48	0.26	NA	NA	0.54	NA
chr16:3055313:3055496:+@chr16:3055783:3055828:+@chr16:3057379:3058667:+	SE	0.0369594	0.81	0.92	0.93	0.9	0.91	0.63	0.78	0.91	0.86	0.96	0.86	0.88	0.58	0.98	0.88	0.83	0.91	0.85	0.88	0.93	0.7	0.69	0.78	0.81	0.56	0.85	0.88	0.64	0.9	0.9	0.86	0.84	0.89
chr16:3055313:3055496:+@chr16:3055786:3055828:+@chr16:3057379:3058667:+	SE	0.0200069	0.79	0.94	0.93	0.89	0.92	0.66	0.78	0.91	0.88	0.95	0.84	0.88	0.69	0.98	0.88	0.79	0.92	0.84	0.89	0.95	0.76	0.69	0.8	0.84	0.58	0.86	0.92	0.62	0.89	0.83	0.86	0.75	0.84
chr16:30672216:30672379:+@chr16:30675189|30675412:30675537:+	A3SS	0.016943	NA	0.5	0.57	0.73	0.74	0.73	0.83	0.51	0.45	0.74	0.83	0.78	0.42	0.66	NA	0.73	0.75	NA	0.75	0.68	0.47	0.72	0.63	0.48	0.57	0.59	0.55	0.34	0.65	0.71	0.43	0.68	0.56
chr16:30675189:30675342:+@chr16:30675412:30675537:+	RI	0.0208386	NA	NA	NA	NA	0.77	0.81	0.74	NA	0.76	0.58	0.62	0.63	NA	0.75	NA	0.64	0.75	NA	0.83	0.7	NA	0.62	0.63	NA	NA	0.58	NA	0.52	NA	NA	NA	NA	NA
chr16:3124632:3124878:-@chr16:3122852:3122947:-@chr16:3121670:3122105:-	SE	0.0482612	NA	NA	0.73	0.34	0.3	0.38	0.35	0.47	0.59	0.47	0.5	0.58	NA	0.55	NA	0.28	0.8	0.56	0.53	0.49	NA	0.29	0.42	0.28	0.4	0.27	0.37	0.41	0.51	0.3	NA	0.53	0.48
chr16:3124632:3124878:-@chr16:3122852:3123196:-@chr16:3121670:3122105:-	SE	0.0216553	NA	NA	0.57	0.53	0.32	0.39	0.54	0.45	0.59	0.46	0.34	0.53	NA	0.17	NA	0.35	0.19	0.54	0.49	0.54	NA	0.11	0.31	0.29	0.76	0.12	0.24	0.36	0.3	0.18	NA	0.37	0.44
chr16:3124632:3124878:-@chr16:3122947|3123196:3122852:-	A3SS	0.0276771	NA	NA	NA	0.51	NA	0.57	0.42	0.5	NA	NA	0.26	0.53	NA	0.55	NA	NA	NA	NA	NA	0.53	NA	0.14	0.35	NA	NA	0.2	NA	0.43	NA	NA	NA	NA	0.42
chr16:31411800:31412609:-@chr16:31411162|31411183:31411019:-	A3SS	0.0320314	0.49	0.57	0.51	0.42	0.35	0.47	0.73	0.58	0.68	0.7	0.47	0.8	0.42	0.65	0.5	0.67	0.57	0.52	0.68	0.65	0.48	0.62	0.42	0.5	NA	0.53	0.55	0.62	0.43	0.44	0.24	0.42	0.39
chr16:3469472:3469601:+@chr16:3472503:3472599:+@chr16:3473364:3473800:+	SE	0.0110497	0.77	0.87	0.77	0.83	0.87	0.82	0.84	NA	0.81	0.91	0.91	0.96	0.68	0.91	0.85	0.74	0.86	0.6	0.91	0.93	0.74	0.8	0.77	0.59	0.44	0.86	NA	0.93	0.77	0.67	0.6	0.79	0.63
chr16:3632894:3633038:+@chr16:3641319:3641923:+@chr16:3644963:3645046:+	SE	0.0180882	NA	0.4	0.52	0.51	0.53	0.52	0.53	0.55	0.43	0.57	0.58	0.58	0.59	0.45	NA	0.54	0.6	NA	0.54	NA	NA	0.49	0.48	NA	NA	0.43	0.52	0.53	0.44	0.31	NA	0.51	NA
chr16:3665326:3665399:-@chr16:3664496|3664599:3664341:-	A3SS	0.0468275	NA	NA	NA	NA	0.3	0.38	0.28	0.54	0.22	0.4	0.2	0.64	NA	NA	NA	0.49	0.36	NA	0.14	0.57	NA	0.58	0.63	NA	NA	0.67	0.57	0.51	NA	0.14	NA	0.65	NA
chr16:390343:390649:+@chr16:390650:390755:+	TandemUTR	0.0300577	NA	NA	0.58	0.67	0.54	0.52	0.5	NA	0.5	0.56	0.7	0.34	0.58	NA	NA	0.67	0.09	NA	0.62	0.26	0.74	0.6	NA	0.64	0.62	0.56	NA	0.7	0.72	0.73	NA	0.43	0.61
chr16:400938:401077:+@chr16:401362:401579:+@chr16:401891:402489:+	SE	0.038974	0.66	0.61	0.75	0.63	0.86	0.8	0.9	0.72	0.78	0.76	0.79	0.92	0.79	0.62	0.56	0.91	0.78	0.68	0.76	0.68	0.66	0.8	0.65	0.39	0.41	0.82	0.85	0.84	0.38	0.52	0.56	0.6	0.36
chr16:4464556:4464794:-@chr16:4464095:4464168:-	RI	0.0102365	NA	NA	NA	NA	0.63	0.64	0.6	0.59	NA	NA	0.58	NA	NA	NA	NA	0.63	NA	NA	NA	NA	NA	0.47	0.55	NA	NA	0.49	0.58	0.53	NA	NA	NA	NA	NA
chr16:45013:45882:+@chr16:46321:46420:+@chr16:46539:46613:+	SE	0.0204116	NA	NA	NA	NA	0.77	0.76	0.73	NA	NA	NA	0.94	NA	0.68	NA	NA	0.73	NA	NA	0.9	0.78	NA	0.81	0.65	NA	NA	0.36	0.66	0.72	NA	0.68	NA	NA	0.56
chr16:4501324:4502412:-@chr16:4500706:4501323:-	TandemUTR	0.0469635	0.44	0.66	0.43	0.72	0.48	0.52	0.6	0.18	0.17	0.17	0.39	0.28	0.45	0.51	0.51	0.7	0.24	0.58	0.16	0.27	0.6	0.69	0.42	0.79	NA	0.35	0.18	0.74	0.52	0.69	0.59	0.7	0.48
chr16:4673845:4673934:+@chr16:4676261:4676305:+@chr16:4678798:4681348:+	SE	0.0114982	0.45	0.43	0.76	0.73	0.81	0.47	0.52	0.18	0.79	0.55	0.51	0.57	0.55	0.39	0.71	0.73	0.39	0.55	0.83	0.82	0.23	0.57	0.2	0.49	0.55	0.66	0.52	0.25	0.37	0.49	0.3	0.41	0.18
chr16:48660192:48660279:+@chr16:48660657:48660701:+@chr16:48661590:48661702:+	SE	0.0170686	NA	NA	NA	NA	0.52	0.61	0.46	NA	NA	NA	0.67	NA	0.52	0.71	NA	NA	0.56	NA	0.55	NA	NA	0.5	0.47	NA	NA	0.5	NA	0.51	0.5	0.48	NA	NA	0.48
chr16:5020387:5020495:-@chr16:5018882:5019010:-@chr16:5017137:5017381:-@chr16:5014846:5015687:-	MXE	0.0191567	0.77	0.33	0.45	0.73	0.6	0.86	0.73	0.42	0.67	0.82	0.74	0.46	0.85	0.9	0.55	0.6	0.84	NA	0.61	0.88	0.47	0.54	0.67	0.59	0.48	0.73	0.4	0.8	0.47	0.45	0.4	0.38	0.52
chr16:52091742:52091631|52091627:-@chr16:52089804:52090009:-	A5SS	0.0231965	NA	0.42	0.55	0.61	0.48	0.38	0.44	NA	0.44	0.2	0.44	0.31	0.6	0.17	NA	0.32	0.32	NA	0.18	0.29	0.52	0.34	0.41	0.49	NA	0.6	NA	0.56	0.39	0.61	0.66	0.6	NA
chr16:55216888:55217292:+@chr16:55217879:55217944:+@chr16:55218293:55218532:+	SE	0.0308803	0.64	0.6	0.74	0.67	0.61	0.65	0.74	0.88	0.8	0.86	0.76	0.89	0.57	0.92	0.63	0.69	0.89	0.8	0.85	0.84	0.61	0.61	0.67	0.65	0.57	0.78	0.86	0.62	0.6	0.54	0.65	0.71	0.74
chr16:55795917:55796421:+@chr16:55799006:55799098:+@chr16:55799471:55799523:+	SE	0.00708655	0.29	0.18	0.08	0.19	0.09	0.23	0.08	0.68	0.05	0.12	0.09	0.22	0.27	0.1	0.26	0.08	0.5	0.65	0.17	0.09	0.46	0.16	0.34	0.57	0.36	0.19	0.8	0.15	0.23	0.72	0.23	0.72	0.52
chr16:56023900:56023973:-@chr16:56022543:56022679:-@chr16:56019583:56020693:-	SE	0.0192145	0.77	0.4	0.42	0.41	0.38	0.62	0.65	0.53	0.35	0.52	0.67	0.43	0.35	0.17	0.53	0.77	0.37	0.55	0.37	0.63	0.61	0.78	0.77	0.76	0.44	0.67	0.6	0.57	0.68	0.32	0.59	0.62	0.79
chr16:56023900:56023973:-@chr16:56022543:56022679:-@chr16:56021671:56021752:-@chr16:56019583:56020693:-	MXE	0.000830353	0.36	0.32	0.35	0.32	0.21	0.23	0.33	0.19	0.32	0.22	0.32	0.15	0.18	0.36	0.56	0.32	0.15	0.3	0.16	0.34	0.4	0.41	0.49	0.46	0.35	0.36	0.35	0.29	0.42	0.24	0.76	0.54	0.8
chr16:56023900:56023973:-@chr16:56022564:56022679:-@chr16:56021671:56021752:-	SE	0.0199454	NA	NA	NA	0.47	0.53	0.56	0.53	NA	0.54	0.47	0.5	NA	0.41	NA	NA	NA	NA	NA	NA	0.56	NA	0.54	NA	NA	NA	0.64	NA	0.59	NA	NA	0.57	NA	NA
chr16:56032185:56032423:-@chr16:56030708|56030747:56030595:-	A3SS	0.0307811	NA	NA	0.52	0.83	0.82	0.63	0.77	NA	0.75	0.81	0.82	0.76	0.69	0.56	0.71	0.73	0.77	NA	0.86	0.68	0.65	0.67	0.75	0.54	NA	0.91	0.71	0.55	0.49	0.8	0.26	0.53	0.4
chr16:56044214:56044349:+@chr16:56047917:56048039:+@chr16:56049659:56049767:+	SE	0.0309273	NA	0.62	0.51	0.71	0.82	0.62	0.8	NA	0.75	0.79	0.8	0.68	0.5	0.7	0.52	0.73	0.61	NA	0.76	0.73	0.68	0.45	0.73	0.55	0.36	0.79	0.45	0.5	0.65	0.59	0.55	0.27	0.77
chr16:56044214:56044349:+@chr16:56047917:56048059:+@chr16:56049659:56049767:+	SE	0.0370473	0.44	0.54	0.51	0.77	0.78	0.78	0.77	NA	0.73	0.73	0.83	0.68	0.44	0.69	0.66	0.7	0.6	NA	0.77	0.71	0.69	0.52	0.71	0.58	0.59	0.73	0.58	0.57	0.64	0.58	0.54	0.31	0.65
chr16:65327648:65327479|65327477:-@chr16:65325622:65325715:-	A5SS	0.0297908	0.47	0.41	NA	0.26	0.26	0.4	0.27	NA	0.44	0.39	0.32	0.18	0.4	0.17	NA	0.16	0.56	NA	0.42	0.31	0.47	0.11	0.78	0.5	0.61	0.42	0.39	0.52	0.56	0.44	0.35	0.43	0.31
chr16:65552634:65552793:+@chr16:65554470:65554488:+@chr16:65554583:65555016:+	SE	0.0389131	0.34	0.18	0.23	0.27	0.28	0.21	0.33	0.4	0.22	0.47	0.4	0.44	0.34	0.78	0.44	0.21	0.26	0.47	0.44	0.71	0.53	0.42	0.46	0.37	NA	0.22	0.64	0.43	0.42	0.43	0.49	0.76	0.5
chr16:65765566:65765858|65765744:+@chr16:65766025:65766539:+	A5SS	0.016804	NA	NA	NA	NA	0.62	0.52	0.3	0.46	0.18	NA	0.53	0.3	NA	NA	NA	0.48	NA	NA	NA	NA	NA	0.74	0.72	NA	NA	0.49	0.65	0.59	NA	0.54	NA	NA	NA
chr16:65819899:65820061:+@chr16:65820201:65820285:+	RI	0.0387225	NA	NA	NA	0.61	0.23	0.2	0.11	0.45	0.3	0.14	0.09	0.04	0.15	0.11	NA	0.12	0.25	NA	0.73	0.07	NA	0.3	0.36	0.54	NA	0.29	0.5	0.22	NA	0.28	NA	0.36	NA
chr16:65823443:65823598:-@chr16:65823223|65823242:65823041:-	A3SS	0.0096624	NA	NA	NA	NA	0.79	0.59	0.77	NA	0.55	0.79	0.86	NA	NA	NA	NA	NA	0.58	NA	NA	0.61	NA	0.45	0.51	NA	NA	0.42	0.61	0.53	0.37	NA	NA	NA	NA
chr16:661861:662003:+@chr16:662085:662182:+	RI	0.0105152	NA	NA	NA	0.57	0.76	0.66	0.58	0.69	NA	0.49	0.67	NA	NA	0.63	NA	0.68	0.46	NA	NA	0.7	NA	0.76	0.74	NA	NA	0.74	0.74	0.72	NA	NA	NA	NA	NA
chr16:662255:662385:+@chr16:662473|662490:662567:+	A3SS	0.00771802	NA	NA	NA	NA	0.66	0.65	0.67	NA	NA	0.71	0.71	0.58	NA	NA	NA	NA	0.68	NA	NA	0.7	NA	0.6	0.48	NA	NA	0.54	0.54	0.6	NA	0.6	NA	NA	NA
chr16:662255:662385:+@chr16:662490:662567:+	RI	0.0279179	NA	NA	NA	0.51	0.4	0.5	0.64	0.46	0.4	0.56	0.49	0.55	NA	NA	NA	0.53	0.59	NA	0.58	0.48	NA	0.55	0.6	NA	NA	0.55	0.58	0.67	NA	0.63	NA	NA	NA
chr16:66535352:66536624:-@chr16:66534593|66534616:66534460:-	A3SS	0.0223792	NA	NA	NA	0.51	0.56	0.54	0.62	0.55	0.47	0.48	0.44	0.45	0.55	0.47	NA	0.71	0.56	NA	NA	0.46	0.5	0.43	0.25	0.42	0.58	0.4	0.43	0.53	0.62	0.39	0.49	0.43	0.42
chr16:66580727:66580802:-@chr16:66579256:66579461:-@chr16:66578794:66579164:-	SE	0.0479798	NA	NA	NA	0.63	0.74	NA	0.68	NA	NA	NA	0.61	0.65	NA	0.64	NA	NA	0.72	NA	NA	NA	NA	0.41	0.62	NA	NA	0.66	NA	0.59	0.44	NA	NA	NA	NA
chr16:66749273:66749472:+@chr16:66758247:66758419:+@chr16:66765778:66765918:+	SE	0.0328423	0.81	0.67	0.76	0.73	0.86	0.77	0.82	0.56	0.82	0.82	0.93	0.89	0.82	0.84	0.41	0.7	0.75	NA	0.82	0.87	0.67	0.85	0.84	0.62	0.55	0.74	0.63	0.87	0.66	0.58	0.6	0.5	0.59
chr16:66822780:66822700|66822582:-@chr16:66822245:66822431:-	A5SS	0.0321166	NA	NA	NA	0.62	0.75	0.79	0.7	NA	0.72	0.8	0.6	NA	0.51	0.85	NA	0.7	0.83	NA	0.63	0.79	NA	0.61	NA	0.59	NA	0.75	0.58	0.75	NA	0.7	0.43	0.59	0.57
chr16:66954900:66955096:-@chr16:66953112|66953163:66953007:-	A3SS	0.003842	NA	NA	0.68	0.64	NA	NA	0.6	NA	0.71	0.63	NA	0.75	NA	0.74	0.62	0.68	0.64	0.69	0.66	0.7	NA	0.58	0.45	NA	NA	0.48	NA	NA	NA	NA	NA	0.5	NA
chr16:670089:670685:+@chr16:671064|671210:671351:+	A3SS	0.0209454	NA	0.51	0.82	0.41	0.46	0.61	0.42	0.76	0.75	0.68	0.58	0.89	0.35	0.73	0.19	0.61	0.86	NA	0.67	0.79	0.2	0.45	0.57	0.48	0.73	0.34	0.61	0.51	0.48	0.43	NA	0.36	0.18
chr16:67131108:67131229:+@chr16:67148577:67148695:+@chr16:67149402:67149576:+	SE	0.0483327	NA	NA	NA	NA	0.6	NA	0.66	0.51	0.6	NA	0.43	NA	NA	NA	NA	0.66	0.74	NA	0.56	NA	NA	0.41	0.53	NA	0.57	0.36	0.51	0.5	NA	NA	0.57	NA	NA
chr16:671439:671690|671597:+@chr16:671794:672077:+	A5SS	0.0129097	NA	0.78	0.68	0.67	0.86	0.39	0.77	0.7	0.61	0.84	0.84	0.84	0.71	0.87	0.53	0.73	0.73	NA	0.6	0.85	0.43	0.53	0.57	0.73	0.58	0.52	0.89	0.49	0.73	0.46	0.69	0.6	0.39
chr16:671439:671690|671604:+@chr16:671794:672077:+	A5SS	0.0191265	NA	0.63	0.46	0.52	0.57	0.39	0.45	0.61	0.6	0.7	0.68	0.82	0.62	0.8	0.35	0.53	0.67	NA	0.64	0.71	0.39	0.45	0.42	0.65	0.41	0.44	0.83	0.37	0.62	0.42	0.46	0.43	0.24
chr16:671794:671877:+@chr16:672021:672077:+	RI	0.00664695	NA	NA	NA	NA	0.51	0.42	NA	NA	0.42	0.39	0.39	0.55	0.45	0.49	0.51	0.38	0.47	NA	0.5	NA	NA	0.53	0.58	NA	NA	0.47	NA	0.66	NA	0.53	NA	0.53	0.52
chr16:67729205:67729381|67729289:+@chr16:67731229:67731318:+	A5SS	0.0234363	NA	NA	NA	NA	NA	NA	NA	NA	NA	0.61	0.49	NA	NA	NA	NA	0.46	0.51	NA	NA	NA	NA	0.38	0.42	NA	NA	0.35	0.46	0.46	0.43	NA	NA	NA	NA
chr16:70455542:70455646:-@chr16:70453180:70453346:-@chr16:70451084:70452076:-	SE	0.0341587	NA	NA	0.65	0.67	0.59	0.62	0.7	0.5	0.85	0.52	0.74	0.58	0.38	0.72	NA	0.62	0.68	NA	NA	0.35	NA	0.64	0.6	NA	NA	0.53	0.43	0.45	0.55	0.35	NA	0.36	0.53
chr16:718117:718896:+@chr16:719010|719289:719716:+	A3SS	0.017316	NA	NA	NA	NA	0.39	0.14	0.59	NA	NA	NA	0.41	NA	NA	NA	NA	0.43	NA	NA	NA	NA	NA	0.45	0.65	NA	NA	0.7	0.46	0.64	0.63	NA	NA	NA	NA
chr16:73256144:73256089|73256023:-@chr16:73251844:73252850:-	A5SS	0.0434867	NA	NA	0.56	0.34	0.42	0.38	0.41	NA	0.65	0.5	0.7	0.47	0.54	0.54	0.42	0.65	0.76	0.54	0.57	0.76	0.38	0.58	0.37	0.54	NA	0.48	0.41	0.35	0.62	0.46	0.36	0.34	0.46
chr16:73270298:73270379:-@chr16:73267700:73267824:-@chr16:73267012:73267163:-	SE	0.03464	NA	NA	NA	0.67	0.68	0.63	0.57	NA	0.56	0.7	0.45	NA	0.51	0.55	NA	0.61	0.51	0.5	0.59	0.58	NA	0.23	0.65	NA	NA	0.65	0.5	0.45	0.47	0.5	0.44	0.52	0.51
chr16:74238977:74239146:-@chr16:74235682:74235861:-@chr16:74232963:74233122:-	SE	0.0155992	0.48	0.28	0.34	0.47	0.44	0.32	0.4	0.59	0.16	0.09	0.3	0.63	0.38	0.35	0.46	0.33	0.28	NA	0.64	0.51	0.48	0.29	0.13	0.53	0.69	0.45	0.68	0.46	0.71	0.52	0.65	0.52	0.72
chr16:776929:776828|776826:-@chr16:774975:776378:-	A5SS	0.0287875	NA	0.27	0.32	0.21	0.27	0.32	0.25	0.49	0.48	0.46	0.24	0.27	0.53	0.51	0.45	0.26	0.27	NA	0.48	0.42	NA	0.11	0.5	0.5	NA	0.43	0.5	0.42	0.54	0.51	0.4	0.5	0.56
chr16:79636076:79636283:+@chr16:79636284:79638343:+	TandemUTR	0.0443417	0.51	0.7	0.69	0.59	0.51	0.57	0.61	0.54	0.5	0.57	0.67	0.62	0.55	0.78	0.49	0.58	0.53	0.48	0.63	0.65	0.55	0.58	0.38	0.61	0.52	0.52	0.52	0.61	0.5	0.53	0.42	0.47	0.57
chr16:82506595:82506698:+@chr16:82506699:82507283:+	TandemUTR	0.0374828	NA	0.45	NA	0.39	0.48	0.54	0.52	NA	0.45	0.51	0.44	0.56	0.5	0.43	NA	0.36	0.54	NA	0.39	0.45	0.67	0.43	0.58	0.45	NA	0.68	0.58	0.64	0.52	0.52	0.47	0.61	0.39
chr16:84204323:84204505:+@chr16:84225021:84225239:+@chr16:84239659:84239858:+	SE	0.00214354	NA	NA	0.59	0.65	0.72	0.65	0.82	NA	NA	NA	0.62	NA	0.54	NA	NA	0.62	0.63	0.56	NA	NA	0.49	0.43	0.52	NA	0.61	0.42	0.45	0.52	0.68	0.53	0.42	0.57	0.31
chr16:85099762:85100205:-@chr16:85081960:85082111:-@chr16:85078777:85081620:-	SE	0.00294052	0.56	0.56	0.39	0.65	0.74	0.85	0.92	0.56	0.79	0.77	0.75	0.49	0.67	0.6	0.6	0.77	0.83	0.7	0.57	0.51	0.79	0.83	0.83	0.57	0.7	0.84	0.79	0.9	0.79	0.88	0.86	0.82	0.79
chr16:87256920:87257056:-@chr16:87254429:87254546:-@chr16:87252559:87252629:-	SE	0.0370286	NA	NA	NA	0.56	0.41	0.54	0.57	0.59	0.62	NA	0.53	0.58	0.7	0.41	NA	0.48	NA	NA	NA	0.62	NA	0.48	0.47	NA	NA	0.49	0.44	0.39	NA	0.34	0.68	NA	0.26
chr16:87300080:87300329:-@chr16:87295171:87295327:-@chr16:87293529:87293641:-	SE	0.0241812	0.52	0.51	NA	0.67	0.72	0.78	0.62	0.61	NA	0.56	0.72	0.6	0.36	NA	0.62	0.58	0.77	NA	NA	NA	NA	0.86	0.83	0.54	NA	0.82	0.65	0.78	0.69	0.73	NA	NA	NA
chr16:87687755:87687901:+@chr16:87692500:87692672:+@chr16:87694571:87695256:+	SE	0.0334794	0.64	0.47	0.7	0.76	0.55	0.37	0.55	0.58	0.33	0.32	0.64	0.64	0.33	0.64	0.35	0.63	0.29	0.37	0.5	0.5	0.42	0.6	0.51	0.61	NA	0.72	0.72	0.68	0.59	0.75	0.65	0.64	0.53
chr16:88155136:88155277:+@chr16:88155574:88155660:+	RI	0.0311919	0.04	0.02	0.02	0.01	0.01	0.01	0.02	0.27	0.52	0.61	0.01	0.56	0	0.61	0.09	0.02	0.57	0.13	0.53	0.55	0.07	0.01	0.01	0.01	0.05	0.01	0.07	0.01	0.01	0.01	0.01	0.04	0.03
chr16:88155136:88155281:+@chr16:88155487:88155660:+	RI	0.0308006	0.01	0.03	0.02	0.01	0.01	0.01	0.01	0.02	0.01	0.01	0.01	0.01	0.01	0.01	0.01	0.01	0.01	0.02	0.02	0.01	0.02	0.01	0.01	0.02	0.05	0.01	0.02	0.01	0.01	0.02	0.02	0.03	0.03
chr16:88155136:88155298:+@chr16:88155487:88155660:+	RI	0.0498434	0.01	0.04	0.02	0.01	0.01	0.01	0.01	0.02	0.01	0.01	0.01	0.01	0.01	0.01	0.01	0.01	0.01	0.03	0.02	0.01	0.02	0.01	0.01	0.02	0.05	0.01	0.02	0.01	0.01	0.02	0.02	0.03	0.03
chr16:88243406:88243287|88243260:-@chr16:88240856:88241240:-	A5SS	0.0414665	0.61	0.53	0.88	0.76	0.8	0.71	0.42	0.66	0.84	0.95	0.93	0.87	0.53	0.76	NA	0.81	0.86	NA	0.91	0.7	0.59	0.87	0.41	NA	NA	0.84	NA	0.64	0.39	0.72	0.51	0.6	0.63
chr16:88280578:88280668:+@chr16:88281358:88281457:+@chr16:88281498:88281724:+@chr16:88283161:88283233:+	MXE	0.0330744	NA	NA	0.2	0.38	0.07	0.18	0.11	0.55	NA	0.07	0.08	0.08	0.17	0.09	0.51	0.4	0.42	NA	NA	0.13	NA	0.1	0.68	0.42	NA	0.56	0.08	0.21	0.58	0.58	0.27	0.56	0.18
chr16:88333387:88333667:-@chr16:88333175|88333198:88333038:-	A3SS	0.0111232	NA	NA	NA	0.59	0.42	0.38	NA	NA	NA	0.46	0.6	0.41	0.32	0.45	NA	0.62	0.45	NA	0.59	0.65	NA	0.66	0.67	NA	NA	0.68	0.63	0.62	0.44	0.64	NA	NA	NA
chr16:88566489:88566674:+@chr16:88571548|88571587:88571711:+	A3SS	0.0096624	NA	NA	NA	NA	0.41	0.48	0.53	NA	0.58	NA	0.48	NA	NA	NA	NA	0.45	NA	NA	NA	NA	NA	0.58	0.72	0.54	NA	0.62	0.56	0.81	NA	0.57	NA	NA	0.63
chr17:10524735:10525159:-@chr17:10524377:10524734:-	TandemUTR	0.0209696	0.73	0.76	0.81	0.92	0.88	0.71	0.83	0.61	0.41	0.17	0.93	0.63	0.83	0.57	0.8	0.86	0.63	0.71	0.69	0.84	0.84	0.83	0.83	0.88	0.84	0.86	0.82	0.79	0.86	0.94	0.63	0.86	0.89
chr17:1212052:1211946|1211942:-@chr17:1211136:1211342:-	A5SS	0.0338768	0.46	0.43	0.38	0.18	0.27	0.18	0.15	0.63	0.6	0.43	0.06	0.26	0.19	0.58	0.26	0.26	0.11	0.59	0.4	0.41	0.49	0.23	0.26	0.28	0.13	0.06	0.09	0.13	0.34	0.21	0.22	0.1	0.18
chr17:1212052:1211974|1211942:-@chr17:1211136:1211342:-	A5SS	0.00501978	0.68	0.73	0.82	0.82	0.81	0.51	0.77	0.72	0.87	0.83	0.75	0.79	0.68	0.82	0.7	0.85	0.89	0.84	0.81	0.89	0.69	0.76	0.82	0.8	0.32	0.68	0.68	0.56	0.79	0.59	0.51	0.63	0.74
chr17:1212052:1211974|1211946:-@chr17:1211136:1211342:-	A5SS	0.0440927	0.77	0.73	0.85	0.89	0.89	0.64	0.87	0.8	0.89	0.87	0.88	0.86	0.74	0.88	0.76	0.93	0.94	0.84	0.87	0.93	0.76	0.85	0.89	0.83	0.53	0.86	0.87	0.71	0.84	0.68	0.64	0.86	0.83
chr17:12849031:12849143:-@chr17:12847521:12847616:-@chr17:12846483:12846621:-	SE	0.0197694	NA	NA	NA	0.66	0.74	0.7	0.79	NA	0.71	0.82	0.81	0.76	0.62	0.78	NA	0.78	0.81	NA	0.62	0.74	0.65	0.77	0.61	NA	NA	0.84	0.65	0.73	0.57	0.63	0.61	0.62	0.56
chr17:1287199:1286834|1286664:-@chr17:1270658:1273694:-	A5SS	0.00655355	0.42	0.38	0.26	0.38	0.42	0.49	0.49	0.56	0.48	0.43	0.41	0.43	0.36	0.52	0.32	0.54	0.51	0.47	0.57	0.7	0.42	0.36	0.38	0.48	0.21	0.46	0.35	0.38	0.36	0.32	0.38	0.37	0.38
chr17:15109196:15109399:-@chr17:15104692:15104799:-@chr17:15102779:15103235:-	SE	0.042917	0.6	0.64	0.7	0.81	0.85	0.66	0.82	NA	0.69	0.44	0.63	0.77	0.71	0.72	0.6	0.61	0.87	0.45	0.31	0.63	0.7	0.77	0.78	0.74	NA	0.82	0.71	0.74	0.8	0.8	0.73	NA	0.68
chr17:16412991:16413250:-@chr17:16412082:16412153:-@chr17:16411368:16411968:-	SE	0.0238095	NA	NA	NA	0.49	0.38	0.51	0.41	NA	NA	NA	0.52	NA	NA	NA	NA	0.35	NA	NA	NA	NA	NA	0.29	0.31	NA	NA	NA	NA	0.34	NA	NA	NA	NA	NA
chr17:16986666:16986804:+@chr17:16987595:16987708:+@chr17:16990075:16990131:+	SE	0.00791395	NA	NA	0.41	0.5	0.5	0.5	0.5	0.45	0.52	NA	0.5	0.5	0.47	0.54	0.52	0.54	0.49	0.45	0.58	0.49	0.46	0.54	0.56	0.6	NA	0.64	0.6	0.5	0.57	0.59	0.61	0.42	0.62
chr17:17076827:17076940:-@chr17:17075833:17075921:-@chr17:17071913:17072200:-	SE	0.0291372	0.69	0.78	0.6	0.49	0.71	0.76	0.75	NA	0.78	0.67	0.64	0.62	0.72	0.87	0.77	0.66	0.64	NA	0.72	0.86	NA	0.68	0.84	0.46	0.51	0.85	0.51	0.71	0.53	0.27	0.62	0.63	0.37
chr17:18098118:18098221:-@chr17:18097638:18097758:-@chr17:18097340:18097497:-	SE	0.0332854	NA	0.69	0.63	0.7	0.69	0.82	0.78	NA	0.63	0.72	0.87	0.66	0.73	0.75	0.69	0.41	0.29	NA	0.61	0.7	0.62	0.74	0.59	0.66	NA	0.63	0.56	0.76	0.62	0.59	0.46	0.35	0.58
chr17:1891812:1891919:+@chr17:1892649:1893468:+	RI	0.0313465	0.07	0.3	0.05	0.05	0.02	0.03	0.03	0.39	0.02	0.06	0.03	0.03	0.01	0.02	0.04	0.03	0.04	0.27	0.03	0.01	0.12	0.05	0.07	0.12	0.08	0.06	0.2	0.02	0.06	0.03	0.07	0.13	0.05
chr17:19227566:19228366:-@chr17:19227349:19227565:-	TandemUTR	0.0037403	0.79	0.74	0.86	0.94	0.9	0.81	0.92	0.69	0.79	0.7	0.92	0.81	0.82	0.48	0.9	0.94	0.83	0.81	0.66	0.73	0.93	0.96	0.95	0.9	0.88	0.95	0.63	0.91	0.95	0.9	0.88	0.95	0.91
chr17:19229264:19229360:-@chr17:19229005:19229187:-	RI	0.0345382	NA	NA	0.49	0.36	0.47	0.65	0.43	0.83	0.38	0.85	0.77	0.5	NA	0.41	0.39	0.48	0.4	0.26	NA	0.38	0.62	0.66	0.67	0.65	NA	0.68	0.75	0.61	0.43	0.67	0.46	0.62	0.73
chr17:19514953:19515861:+@chr17:19517056|19517112:19517180:+	A3SS	0.0390827	NA	0.64	0.77	0.74	0.51	0.76	0.67	0.67	0.67	0.61	0.9	0.85	0.63	0.84	0.47	0.86	NA	0.48	0.56	0.88	0.68	0.45	0.47	0.6	0.36	0.59	0.58	0.71	0.63	0.73	0.55	0.6	0.71
chr17:19639527:19639630:-@chr17:19629842:19629910:-@chr17:19627602:19627810:-	SE	0.0116821	NA	NA	NA	NA	0.64	0.67	0.75	NA	0.7	NA	0.74	NA	0.66	NA	NA	0.69	NA	NA	NA	NA	NA	0.58	0.66	NA	NA	NA	NA	0.62	0.53	0.34	NA	NA	NA
chr17:22989416:22989507:+@chr17:22991725|22991796:22991926:+	A3SS	0.0478855	0.49	0.63	0.66	0.77	0.78	0.65	0.65	0.56	0.55	0.8	0.88	0.76	0.7	0.62	0.57	0.67	0.84	NA	0.73	0.74	0.43	0.66	0.67	0.56	0.52	0.73	0.65	0.63	0.66	0.41	0.68	0.59	0.57
chr17:23755761:23756613:-@chr17:23751753:23751910:-@chr17:23745788:23750856:-	SE	0.00298863	0.74	0.67	0.6	0.68	0.66	0.85	0.73	0.74	0.67	0.69	0.84	0.58	0.64	0.94	0.67	0.58	0.81	0.36	0.75	0.83	0.6	0.6	0.68	0.82	0.41	0.56	0.55	0.66	0.5	0.46	0.61	0.47	0.44
chr17:23898822:23898994:-@chr17:23897853:23898550:-	RI	0.0443964	0.44	0.35	0.28	0.45	0.19	0.28	0.22	0.29	0.3	0.17	0.17	0.13	0.16	0.16	0.19	0.09	0.25	NA	0.12	0.19	0.44	0.25	0.42	0.6	NA	0.25	0.4	0.2	0.2	0.1	0.34	0.29	0.68
chr17:24933071:24933288:-@chr17:24932976|24932980:24932886:-	A3SS	0.00477316	NA	NA	NA	NA	0.83	NA	0.68	0.56	0.67	0.66	0.79	0.85	NA	NA	NA	0.77	0.83	NA	NA	0.8	NA	0.52	0.33	NA	NA	0.66	0.51	0.53	NA	NA	NA	NA	NA
chr17:26374570:26375570:+@chr17:26382704:26382826:+@chr17:26383570:26383650:+	SE	0.0402512	NA	NA	NA	0.56	0.43	0.52	0.62	NA	0.71	NA	0.8	NA	0.66	NA	NA	0.56	NA	NA	0.6	0.64	0.5	0.75	0.54	NA	NA	0.43	NA	0.56	0.38	0.56	NA	0.41	0.51
chr17:28282458:28282533:+@chr17:28282606:28282790:+	RI	0.0314286	0.46	0.75	0.72	0.73	0.62	0.56	0.81	0.72	0.48	0.54	0.6	0.52	0.72	0.76	0.58	0.61	0.8	NA	0.43	0.92	0.63	0.45	0.57	0.59	NA	0.59	0.7	0.42	0.59	0.48	0.34	0.7	0.38
chr17:28282458:28282533:+@chr17:28282612:28282790:+	RI	0.0195684	0.34	0.69	0.7	0.69	0.67	0.59	0.83	0.7	0.66	0.71	0.55	0.6	0.66	0.9	0.51	0.72	0.74	NA	0.79	0.86	0.58	0.5	0.63	0.66	NA	0.62	0.77	0.52	0.58	0.64	0.48	0.69	0.48
chr17:30377506:30377693:-@chr17:30372503:30372913:-@chr17:30368655:30368738:-	SE	0.0282457	0.66	0.54	0.44	0.74	0.68	0.51	0.84	0.67	0.8	0.64	0.77	0.34	0.61	0.77	0.68	0.52	0.81	0.55	0.73	0.49	0.56	0.57	0.72	0.42	0.58	0.42	0.25	0.41	0.61	0.68	0.54	0.41	0.6
chr17:30798400:30798546:-@chr17:30796505:30796825:-@chr17:30795747:30795833:-	SE	0.0355137	0.52	NA	NA	0.51	0.65	0.57	0.52	NA	0.62	NA	0.61	NA	0.71	NA	NA	0.62	0.5	NA	NA	NA	0.5	0.5	NA	0.49	0.55	0.54	NA	0.5	0.5	NA	0.59	0.56	NA
chr17:30798400:30798546:-@chr17:30797972:30798064:-@chr17:30797849:30797885:-@chr17:30795747:30796825:-	MXE	0.00453737	0.51	NA	0.37	0.32	0.36	0.24	0.5	0.58	0.54	NA	0.44	0.51	0.51	0.43	0.49	0.55	0.55	0.5	NA	0.82	0.28	0.16	0.49	0.28	0.42	0.33	NA	0.27	0.47	0.41	0.49	0.35	0.37
chr17:31130005:31130192:-@chr17:31124298:31124521:-@chr17:31121199:31121444:-	SE	0.0305709	NA	0.72	0.59	0.76	0.76	0.91	0.82	0.69	0.65	0.8	0.85	0.77	0.75	0.88	0.72	0.9	0.7	NA	0.89	0.69	0.59	0.78	0.7	0.69	NA	0.79	0.76	0.75	0.6	0.66	0.63	0.44	0.72
chr17:31563291:31563405:+@chr17:31563808|31563818:31564393:+	A3SS	0.00539529	NA	NA	NA	NA	0.32	0.47	0.39	NA	NA	0.46	0.44	0.46	0.57	0.48	NA	NA	NA	NA	NA	NA	NA	0.65	0.47	0.5	NA	NA	NA	0.68	0.61	0.64	0.62	NA	NA
chr17:31563291:31563405:+@chr17:31563808|31563849:31564393:+	A3SS	0.0037296	NA	NA	NA	NA	0.33	0.25	0.24	NA	NA	0.09	0.14	0.4	0.36	0.12	NA	NA	NA	NA	NA	NA	NA	0.56	0.57	0.48	NA	NA	NA	0.37	0.31	0.43	0.58	NA	NA
chr17:31563291:31563405:+@chr17:31563808|31563879:31564393:+	A3SS	0.00755603	NA	NA	NA	NA	0.24	0.24	0.22	NA	NA	0.12	0.12	0.33	0.38	0.2	NA	NA	NA	NA	NA	NA	NA	0.55	0.26	0.36	NA	NA	NA	0.44	0.36	0.38	0.47	NA	NA
chr17:31563291:31563405:+@chr17:31563818:31564393:+	RI	0.036904	NA	NA	NA	NA	0.3	0.27	0.24	NA	NA	0.05	0.11	0.26	0.3	0.02	NA	NA	NA	NA	NA	NA	NA	0.42	0.31	0.45	NA	NA	NA	0.26	0.34	0.4	0.07	NA	NA
chr17:31563291:31563405:+@chr17:31563818|31563849:31564393:+	A3SS	0.00915538	NA	NA	NA	NA	0.28	0.41	0.28	NA	NA	0.19	0.17	0.45	0.4	0.12	NA	NA	NA	NA	NA	NA	NA	0.43	0.52	0.49	NA	NA	NA	0.42	0.56	0.31	0.62	NA	NA
chr17:31563291:31563405:+@chr17:31563828|31563849:31564393:+	A3SS	0.0319694	NA	NA	NA	NA	0.3	0.4	0.32	NA	NA	0.15	0.14	0.38	0.69	0.18	NA	NA	NA	NA	NA	NA	NA	0.36	0.5	0.47	NA	NA	NA	0.42	0.46	0.46	0.5	NA	NA
chr17:31958008:31958170:-@chr17:31957643|31957658:31957495:-	A3SS	0.0366835	NA	NA	0.64	0.69	0.83	0.76	0.73	0.76	0.72	0.74	0.85	0.81	NA	0.89	NA	0.6	0.84	NA	0.63	0.84	NA	0.75	0.8	0.65	NA	0.64	0.67	0.69	0.42	0.61	NA	0.67	NA
chr17:32652758:32652876:-@chr17:32641494:32641517:-@chr17:32638684:32638827:-	SE	0.00960893	NA	NA	NA	0.44	0.54	0.64	0.76	NA	0.75	0.76	0.88	0.52	0.68	0.72	NA	0.6	0.86	NA	NA	0.79	NA	0.29	NA	NA	NA	0.53	NA	0.51	0.53	0.57	NA	NA	0.5
chr17:32845469:32845590:+@chr17:32857722:32857824:+@chr17:32861162:32861221:+	SE	0.0446392	NA	NA	NA	0.49	0.48	NA	0.69	NA	NA	NA	0.51	0.54	0.53	NA	0.56	0.51	NA	NA	0.58	NA	NA	0.43	NA	NA	NA	NA	NA	0.42	NA	NA	NA	NA	NA
chr17:34165662:34165769:+@chr17:34170210:34170387:+@chr17:34172190:34172284:+	SE	0.0295441	0.48	0.51	0.65	0.58	0.7	0.73	0.68	0.68	0.63	0.7	0.77	0.68	0.58	0.71	0.49	0.69	0.64	0.44	0.64	0.61	0.5	0.64	0.6	0.51	0.3	0.45	0.62	0.75	0.63	0.61	0.56	0.43	0.57
chr17:35319535:35319703:-@chr17:35318737:35318821:-@chr17:35316740:35316766:-	SE	0.0226479	0.6	0.49	0.53	0.44	0.62	0.44	0.61	NA	0.59	0.51	0.58	0.63	0.55	0.53	0.55	0.43	0.34	NA	0.57	0.54	0.6	0.48	0.36	0.5	0.43	0.48	NA	NA	NA	0.46	0.42	0.52	0.41
chr17:3541687:3542044:-@chr17:3540999:3541070:-@chr17:3540648:3540723:-	SE	0.0357701	NA	NA	NA	0.74	0.78	NA	NA	NA	NA	NA	0.75	NA	0.43	NA	NA	NA	0.78	NA	NA	NA	NA	0.95	0.8	NA	NA	NA	NA	NA	0.91	NA	NA	NA	NA
chr17:36055354:36055397:-@chr17:36054163:36054237:-@chr17:36050352:36052337:-	SE	0.0133408	0.53	0.52	0.7	0.49	0.38	0.43	0.4	0.5	0.43	0.51	0.2	0.57	0.44	0.36	0.61	0.45	0.5	0.51	0.48	0.5	0.53	0.3	0.42	0.43	0.39	0.38	0.47	0.33	0.43	0.41	0.43	0.4	0.41
chr17:37372264:37372431:+@chr17:37373237:37373297:+@chr17:37373612:37375132:+	SE	0.0214752	0.42	0.43	0.44	0.89	0.8	0.75	0.81	0.82	0.16	0.52	0.82	0.49	0.63	0.36	0.62	0.74	0.31	0.59	0.57	0.72	0.76	0.82	0.87	0.86	NA	0.75	0.82	0.64	0.71	0.83	0.76	0.62	0.52
chr17:37379468:37380718:+@chr17:37380719:37382247:+	TandemUTR	0.0337723	0.12	0.13	0.12	0.1	0.06	0.03	0.09	0.2	0.07	0.03	0.06	0.02	0.1	0.09	0.21	0.13	0.05	0.56	0.11	0.1	0.18	0.06	0.17	0.28	0.2	0.18	0.39	0.08	0.12	0.11	0.22	0.09	0.13
chr17:37793823:37794111:-@chr17:37753933:37754061:-@chr17:37752113:37752257:-	SE	0.0339217	0.84	0.63	0.89	0.66	0.85	0.84	0.86	0.88	0.87	0.92	0.83	0.9	0.51	0.92	0.72	0.86	0.95	0.79	0.77	0.95	0.81	0.71	0.83	0.73	0.64	0.87	0.85	0.77	0.54	0.71	0.51	0.92	0.66
chr17:37793823:37794111:-@chr17:37753933:37754064:-@chr17:37752113:37752257:-	SE	0.0459799	0.84	0.61	0.86	0.67	0.86	0.84	0.85	0.75	0.87	0.94	0.84	0.91	0.54	0.94	0.77	0.86	0.94	0.61	0.87	0.94	0.82	0.71	0.83	0.71	0.7	0.87	0.86	0.76	0.52	0.72	0.42	0.87	0.63
chr17:37793823:37794111:-@chr17:37753933:37754083:-@chr17:37752113:37752257:-	SE	0.0351966	0.85	0.61	0.88	0.68	0.88	0.86	0.88	0.93	0.9	0.91	0.86	0.91	0.52	0.93	0.85	0.88	0.94	0.76	0.91	0.96	0.83	0.77	0.87	0.75	0.77	0.89	0.88	0.8	0.72	0.74	0.54	0.91	0.65
chr17:37974014:37974103:+@chr17:37974381:37974487:+	RI	0.037459	NA	0.53	0.52	0.51	0.7	0.57	0.54	NA	0.55	0.48	0.6	0.48	0.62	0.5	0.41	0.53	0.36	NA	0.49	0.58	0.51	0.46	0.55	NA	NA	0.46	0.43	0.5	0.48	0.48	NA	NA	0.43
chr17:38124649:38124751:-@chr17:38123998:38124161:-@chr17:38123520:38123611:-	SE	0.0205893	NA	NA	NA	0.6	0.52	0.56	0.53	NA	0.49	NA	0.56	0.57	0.46	0.49	NA	0.53	NA	NA	NA	0.59	0.39	0.52	0.45	NA	NA	0.51	NA	0.42	0.5	0.5	NA	NA	NA
chr17:38128339:38128459:-@chr17:38125991|38125993:38125817:-	A3SS	0.0367439	NA	NA	NA	0.59	0.51	0.6	0.53	0.46	0.48	0.61	0.67	NA	0.67	0.52	NA	0.59	0.55	NA	NA	NA	NA	0.6	0.72	NA	NA	0.7	0.67	0.62	0.62	NA	0.71	0.45	NA
chr17:38133307:38133206|38133179:-@chr17:38129849:38129968:-	A5SS	0.0425516	NA	NA	NA	NA	0.66	0.59	NA	NA	0.7	NA	0.54	0.5	NA	0.68	NA	0.64	0.63	NA	0.67	0.61	NA	NA	0.53	NA	NA	0.53	NA	0.6	0.53	0.55	NA	NA	NA
chr17:38220068:38220558:-@chr17:38217199:38217341:-@chr17:38215405:38216472:-	SE	0.0323417	0.86	0.88	0.87	0.94	0.89	0.91	0.9	0.59	0.81	0.9	0.86	0.95	0.73	0.95	0.87	0.88	0.92	0.61	0.92	0.95	0.56	0.8	0.92	0.83	0.84	0.88	0.85	0.94	0.82	0.79	0.69	0.85	0.8
chr17:38385649:38386617:+@chr17:38391194:38391199:+@chr17:38392799:38392957:+	SE	0.0451147	0.6	0.72	0.45	0.27	0.64	0.54	0.59	0.5	0.69	0.71	0.66	NA	0.5	NA	0.63	0.51	0.71	0.36	0.7	0.59	0.5	0.57	0.65	0.38	NA	0.52	0.47	0.54	0.45	0.58	NA	0.5	0.25
chr17:38424342:38424151|38424135:-@chr17:38423540:38423749:-	A5SS	0.00438007	NA	0.67	0.75	0.73	0.76	0.8	0.86	0.61	0.73	0.77	0.77	0.85	0.75	0.76	0.57	0.81	0.85	NA	NA	0.55	0.64	0.65	0.66	0.75	0.19	0.58	0.7	0.54	0.77	0.6	0.37	0.71	0.63
chr17:38536751:38536813:+@chr17:38537831:38538035:+@chr17:38538142:38541867:+	SE	0.0423337	NA	0.4	0.52	0.55	0.61	0.46	0.55	0.35	0.56	0.5	0.35	0.51	0.59	0.31	0.28	0.39	0.28	0.57	0.49	0.63	0.25	0.44	0.26	0.45	NA	0.26	0.48	0.41	0.28	0.31	0.52	0.52	0.47
chr17:38814167:38814554:-@chr17:38812017:38812156:-@chr17:38808823:38810707:-	SE	0.0423411	NA	NA	NA	0.58	0.59	0.74	0.62	0.6	NA	0.59	0.8	0.61	0.46	0.41	NA	0.65	NA	NA	NA	0.7	NA	0.55	0.5	NA	NA	0.49	0.56	0.7	0.36	NA	NA	NA	0.39
chr17:39439423:39440388:+@chr17:39440461|39440485:39440667:+	A3SS	0.0362034	NA	0.64	0.65	NA	NA	NA	NA	0.53	NA	NA	0.73	0.33	NA	0.57	NA	0.53	NA	0.53	NA	0.51	NA	0.6	0.72	NA	NA	NA	0.82	0.77	NA	NA	NA	NA	NA
chr17:39782561:39782647|39782645:+@chr17:39783122:39783234:+	A5SS	0.0498305	NA	NA	NA	NA	NA	NA	0.56	0.62	0.69	NA	0.73	0.73	NA	NA	NA	NA	NA	NA	NA	NA	NA	NA	0.47	NA	NA	0.41	NA	0.56	NA	NA	NA	NA	NA
chr17:40332263:40332519:-@chr17:40327139:40327419:-@chr17:40319479:40319644:-	SE	0.0291069	NA	0.22	0.36	0.62	0.39	NA	0.48	0.62	NA	0.54	0.56	NA	0.31	0.3	0.66	0.65	0.78	0.57	0.54	NA	NA	0.71	0.77	NA	0.53	0.82	0.5	0.4	0.62	0.67	0.64	0.72	0.67
chr17:40583420:40583801:+@chr17:40583802:40585249:+	TandemUTR	0.0115815	0.69	0.68	0.46	0.77	0.57	0.84	0.83	0.62	0.41	0.73	0.46	0.76	0.78	0.72	0.67	0.85	0.76	0.45	0.52	0.8	0.27	0.59	0.75	0.25	0.38	0.78	0.56	0.62	0.58	0.28	0.71	0.36	0.37
chr17:40678353:40678566:+@chr17:40678769:40678883:+@chr17:40679028:40679691:+	SE	0.018085	NA	NA	NA	0.72	0.71	0.68	0.86	0.73	0.75	0.65	0.94	0.72	0.59	0.8	0.64	0.78	0.89	NA	NA	0.4	NA	0.83	0.84	0.57	NA	0.49	0.57	0.51	0.67	0.56	0.58	0.57	0.59
chr17:42556251:42556478:-@chr17:42554901|42554965:42554809:-	A3SS	0.0254915	NA	NA	NA	0.67	0.74	NA	0.67	NA	NA	NA	0.82	0.76	0.57	0.8	NA	0.71	0.66	0.68	0.69	NA	0.49	0.79	0.65	0.58	NA	0.7	NA	0.72	0.62	0.55	0.54	0.6	0.55
chr17:43103067:43103197:+@chr17:43104075:43104227:+@chr17:43105383:43105530:+	SE	0.0224032	0.26	0.38	0.49	0.14	0.11	0.1	0.07	NA	0.08	0.19	0.07	0.15	0.18	0.16	NA	0.05	0.09	NA	0.1	0.12	0.28	0.12	0.11	0.27	0.13	0.19	0.53	0.1	0.28	0.67	0.25	0.24	0.25
chr17:43105383:43105530:+@chr17:43105855:43105926:+@chr17:43107003:43107147:+	SE	0.0371974	0.51	0.71	0.64	0.75	0.65	0.5	0.73	0.73	0.57	0.85	0.66	0.82	0.61	0.93	0.75	0.62	0.76	0.48	0.9	0.93	0.58	0.61	0.61	0.62	0.57	0.65	0.8	0.69	0.59	0.78	0.48	0.46	0.3
chr17:43270635:43270815:-@chr17:43270057:43270367:-	RI	0.0312793	NA	0.32	0.19	0.21	0.3	0.27	0.3	0.18	0.32	0.08	0.2	0.15	0.57	0.2	0.23	0.19	0.1	0.22	0.5	0.31	NA	0.26	0.49	0.13	0.53	0.22	0.38	0.42	0.7	0.38	NA	0.23	0.35
chr17:43270815:43270701|43270635:-@chr17:43270048:43270367:-	A5SS	0.0140246	NA	0.63	0.69	0.69	0.79	0.65	0.76	0.23	0.89	0.75	0.74	0.84	0.34	0.89	0.76	0.69	0.84	0.79	0.63	0.61	NA	0.53	0.5	0.68	0.48	0.58	0.62	0.67	0.38	0.67	NA	0.59	0.79
chr17:44288453:44288548:+@chr17:44292675:44292810:+@chr17:44294637:44294665:+	SE	0.0392353	NA	0.49	0.6	0.51	0.51	0.62	0.56	NA	0.49	0.49	0.51	0.44	NA	0.57	NA	0.46	0.6	NA	0.5	0.51	NA	0.47	0.51	NA	0.47	0.45	0.44	0.47	0.43	0.56	0.46	0.43	0.64
chr17:44373285:44373423:-@chr17:44369642:44369652:-@chr17:44368404:44369485:-	SE	0.00532578	0.71	0.63	0.77	0.83	0.79	0.68	0.88	0.72	0.85	0.79	0.93	0.84	0.65	0.73	0.5	0.79	0.69	NA	0.83	0.89	0.73	0.75	0.75	0.43	0.51	0.5	0.28	0.62	0.62	0.79	0.73	0.68	0.64
chr17:45138565:45138670:-@chr17:45138227:45138257:-	RI	0.0121212	NA	NA	NA	NA	0.4	0.3	NA	NA	0.44	0.53	NA	0.5	NA	0.41	NA	NA	0.51	NA	NA	0.43	NA	0.55	0.65	NA	NA	NA	NA	0.59	NA	NA	NA	NA	NA
chr17:45711668:45712148:+@chr17:45712149:45713845:+	TandemUTR	0.0021948	0.18	0.14	0.19	0.26	0.25	NA	0.11	0.25	0.42	NA	0.24	0.09	0.54	0.19	0.24	0.3	0.67	0.25	NA	0.13	NA	0.72	0.35	NA	NA	0.47	NA	0.66	0.5	0.34	0.43	0.47	NA
chr17:45968781:45969478:+@chr17:45970439|45970480:45970557:+	A3SS	0.0320883	NA	NA	NA	0.56	0.9	0.35	0.78	NA	0.68	0.87	0.8	0.66	NA	0.65	NA	0.81	0.54	NA	0.68	0.41	NA	0.56	0.58	0.55	NA	0.68	0.46	0.59	NA	0.18	0.65	0.34	0.46
chr17:45980080:45980314|45980127:+@chr17:45980643:45981063:+	A5SS	0.0429795	NA	NA	NA	0.42	0.08	0.78	0.13	NA	0.13	0.16	0.07	NA	NA	NA	NA	0.27	0.18	NA	0.1	0.38	NA	0.35	0.49	0.63	NA	0.14	0.32	0.5	0.48	0.33	NA	NA	NA
chr17:45983871:45984039:+@chr17:45984329:45984540:+@chr17:45986611:45986810:+	SE	0.0224373	NA	0.76	NA	0.74	0.94	0.8	0.92	0.66	0.87	0.91	0.94	0.77	0.7	0.81	NA	0.85	0.9	NA	0.89	0.85	0.65	0.79	0.74	0.72	0.73	0.96	0.79	0.77	0.81	0.79	0.62	0.63	0.75
chr17:46067174:46067341:+@chr17:46075909:46076021:+@chr17:46088192:46088368:+	SE	0.0438503	NA	NA	0.51	0.5	0.36	0.41	0.4	0.72	0.28	0.52	0.37	0.13	0.19	0.14	0.73	0.4	0.24	NA	0.46	0.32	0.57	0.35	0.49	NA	0.35	0.44	0.62	0.43	0.49	0.67	0.63	0.64	0.71
chr17:4784074:4784400:+@chr17:4784527:4785033:+@chr17:4785117:4785197:+	SE	0.0403667	0.74	0.71	0.83	0.83	0.9	0.88	0.78	0.78	0.86	0.93	0.95	0.91	0.87	0.92	0.79	0.79	0.86	0.61	0.82	0.87	0.79	0.93	0.75	0.78	0.7	0.82	0.85	0.83	0.75	0.74	0.75	0.74	0.78
chr17:4878377:4877498|4877280:-@chr17:4876621:4877188:-	A5SS	0.0374993	0.66	0.68	0.74	0.33	0.52	0.65	0.58	0.96	0.71	0.67	0.74	0.73	NA	0.68	0.45	NA	0.52	0.59	NA	0.7	NA	NA	0.67	NA	NA	0.52	0.44	0.4	0.51	NA	NA	NA	NA
chr17:5231430:5231714:-@chr17:5231113|5231154:5231028:-	A3SS	0.022166	0.54	NA	0.58	0.59	0.73	NA	0.7	NA	0.76	0.49	0.75	0.84	0.65	0.53	NA	0.53	NA	0.4	0.79	0.62	NA	0.69	0.58	0.5	NA	0.51	0.62	0.56	0.47	0.42	0.47	0.47	0.53
chr17:53849377:53849979:-@chr17:53848119|53848322:53847686:-	A3SS	0.0444664	0.79	0.47	0.67	0.71	0.8	0.67	0.83	0.5	0.74	0.83	0.94	0.81	0.76	0.71	0.63	0.75	0.76	0.36	0.7	0.82	0.37	0.91	0.87	0.6	0.68	0.92	0.79	0.86	0.76	0.84	0.82	0.9	0.87
chr17:54460558:54460866:-@chr17:54449439:54449567:-@chr17:54447753:54447942:-	SE	0.0343761	NA	NA	0.71	0.61	0.8	0.75	0.86	0.6	0.76	0.77	0.86	0.85	0.68	0.65	0.69	0.69	0.78	NA	0.84	0.89	0.5	0.7	0.83	0.49	0.72	0.85	0.75	0.71	0.57	0.57	0.58	0.64	0.69
chr17:55249855:55249916:+@chr17:55266155:55266193:+@chr17:55270438:55270540:+	SE	0.0166667	NA	NA	NA	NA	NA	0.41	0.37	NA	NA	0.53	0.44	0.42	NA	0.52	0.4	NA	NA	NA	NA	NA	NA	NA	NA	NA	NA	0.64	NA	0.59	NA	NA	0.68	NA	NA
chr17:58027678:58027767:+@chr17:58028313:58028351:+@chr17:58031744:58031913:+	SE	0.0450237	NA	NA	0.79	0.55	0.77	0.77	0.82	0.64	0.64	0.71	0.79	0.69	0.57	0.8	0.68	0.73	0.59	0.77	0.7	0.58	0.59	0.5	0.71	0.31	0.48	0.82	0.67	0.6	0.67	0.51	0.6	0.72	0.67
chr17:59172833:59173077:-@chr17:59168488:59168528:-@chr17:59158950:59159505:-	SE	0.0221845	NA	NA	NA	0.19	0.17	0.28	0.3	NA	0.44	NA	0.33	NA	NA	NA	NA	0.39	NA	0.51	0.37	0.47	NA	0.42	0.5	0.4	NA	0.36	NA	0.57	0.41	0.7	NA	0.58	0.47
chr17:59204504:59204866:-@chr17:59203869:59203955:-@chr17:59196433:59197286:-	SE	0.0443596	0.32	0.33	0.59	0.47	0.55	0.48	0.43	0.63	0.52	0.72	0.54	0.67	0.31	0.67	0.47	0.46	0.8	0.32	0.7	0.71	0.46	0.45	0.43	0.37	0.25	0.54	0.76	0.47	0.32	0.37	0.4	0.43	0.44
chr17:59259230:59259301:+@chr17:59260586:59260655:+	RI	0.00964441	NA	NA	NA	0.58	0.56	0.58	0.48	NA	0.46	0.5	0.57	0.5	0.54	0.55	NA	0.43	0.53	NA	NA	0.46	0.46	0.48	0.42	0.42	NA	0.34	NA	0.38	0.42	0.5	0.51	0.53	0.48
chr17:5964705:5965344:+@chr17:5965345:5968471:+	TandemUTR	0.0103451	0.62	0.7	0.46	0.59	0.78	0.62	0.59	0.67	0.84	0.69	0.54	0.6	0.56	0.81	0.66	0.66	0.58	0.38	0.55	0.3	0.8	0.8	0.64	0.67	0.74	0.62	0.72	0.59	0.8	0.84	0.79	0.74	0.65
chr17:60088409:60088922:-@chr17:60033182:60033220:-@chr17:60024962:60025070:-	SE	0.0392706	0.62	0.68	0.37	0.71	0.79	0.53	0.68	0.69	NA	0.86	0.79	NA	0.8	0.83	0.66	0.82	0.66	0.69	NA	0.73	NA	0.7	0.57	0.46	0.47	0.76	0.39	0.82	0.69	0.5	0.62	0.55	0.59
chr17:60207561:60207619:-@chr17:60206923:60207044:-	RI	0.0461678	NA	NA	NA	0.64	0.49	0.47	0.5	0.45	0.45	0.43	0.67	NA	NA	0.49	NA	0.5	0.43	NA	0.47	0.45	NA	0.44	0.43	NA	NA	0.58	0.46	0.41	0.43	NA	NA	0.42	NA
chr17:602123:602268:-@chr17:599804:599899:-@chr17:594339:598022:-	SE	0.00988207	0.48	0.46	0.31	0.28	0.31	0.52	0.68	0.44	0.38	0.48	0.55	0.33	0.32	0.49	0.4	0.36	0.64	0.39	0.45	0.58	0.53	0.63	0.47	0.63	0.54	0.43	0.81	0.25	0.74	0.75	0.5	0.64	0.6
chr17:60401135:60402631:-@chr17:60399507|60400097:60399334:-	A3SS	0.0356186	NA	NA	NA	0.75	0.78	0.78	0.81	NA	NA	0.77	0.69	0.67	0.71	0.71	NA	0.68	NA	NA	0.49	0.66	NA	0.65	0.77	0.66	NA	0.56	0.4	0.61	0.78	0.6	0.42	NA	NA
chr17:6291507:6291806|6291802:+@chr17:6293356:6293451:+	A5SS	0.0357143	NA	NA	NA	NA	0.47	0.53	0.5	NA	NA	NA	0.52	NA	NA	NA	NA	NA	NA	NA	NA	0.48	NA	0.58	NA	NA	NA	0.59	NA	0.55	NA	NA	NA	NA	NA
chr17:6291507:6291814|6291806:+@chr17:6293360:6293451:+	A5SS	0.0357701	NA	NA	NA	NA	0.37	0.29	0.31	NA	NA	NA	0.29	NA	NA	NA	NA	NA	NA	NA	NA	0.21	NA	0.53	NA	NA	NA	0.44	NA	0.46	NA	NA	NA	NA	NA
chr17:6468799:6468905:-@chr17:6467651:6468050:-@chr17:6467553:6467615:-@chr17:6466926:6467141:-	MXE	0.0164451	NA	NA	NA	0.53	0.51	0.27	0.4	NA	NA	0.21	0.07	0.24	NA	NA	NA	0.39	NA	0.37	0.34	0.1	NA	0.34	0.52	0.3	NA	0.68	0.59	0.51	0.65	0.38	NA	0.51	0.52
chr17:6602132:6602267:+@chr17:6602714:6602811:+@chr17:6603299:6603562:+@chr17:6603705:6603761:+	MXE	0.0272103	0.57	NA	0.53	NA	0.62	NA	0.4	0.48	0.5	NA	0.66	NA	0.58	0.25	NA	NA	NA	0.62	NA	NA	NA	0.64	0.67	NA	NA	NA	0.53	0.73	0.74	NA	NA	NA	NA
chr17:6602132:6602267:+@chr17:6603299|6603705:6603761:+	A3SS	0.0322231	0.41	NA	0.41	0.49	0.37	NA	0.52	0.54	0.49	NA	0.47	0.49	0.63	0.53	NA	0.56	0.52	0.58	NA	NA	NA	0.4	0.38	NA	NA	NA	0.49	0.4	0.43	NA	NA	NA	NA
chr17:6602132:6604644:+@chr17:6605929:6606080:+@chr17:6606198:6606283:+	SE	0.0162121	0.76	0.54	0.63	0.74	0.74	0.66	0.5	0.79	0.57	NA	0.67	0.37	0.51	0.45	0.3	0.57	0.81	0.65	NA	0.38	0.42	0.66	0.6	0.5	0.52	0.51	0.36	0.45	0.31	0.42	0.36	0.53	0.37
chr17:68357538:68357368|68357328:-@chr17:68331329:68331617:-	A5SS	0.0340943	NA	NA	NA	0.56	NA	NA	0.53	0.42	NA	NA	0.43	0.6	NA	NA	NA	0.52	NA	NA	NA	NA	0.42	NA	0.42	NA	NA	0.32	NA	NA	0.5	NA	0.37	NA	NA
chr17:70280126:70280129:-@chr17:70279694:70280011:-	RI	0.0441256	NA	NA	NA	0.6	0.76	0.45	0.64	NA	NA	NA	0.68	NA	NA	NA	NA	0.69	NA	NA	NA	NA	NA	0.4	NA	NA	NA	0.52	0.55	0.43	0.6	NA	NA	NA	NA
chr17:7063888:7064240:+@chr17:7064507|7064647:7064719:+	A3SS	0.0267804	0.66	0.52	0.85	0.73	0.82	0.82	0.87	0.97	0.88	0.95	0.82	0.95	0.69	0.91	0.76	0.82	0.94	0.85	0.9	0.97	0.71	0.8	0.79	0.73	0.79	0.87	0.93	0.77	0.67	0.53	0.73	0.78	0.79
chr17:70713192:70713484:+@chr17:70716217:70716310:+@chr17:70717513:70717675:+	SE	0.0444071	NA	0.78	0.67	0.83	0.73	0.87	0.72	0.52	0.82	0.79	0.95	0.83	0.85	0.87	NA	0.9	0.9	NA	0.65	0.86	NA	0.93	0.7	0.68	NA	0.79	0.51	0.71	0.29	0.82	0.66	0.72	NA
chr17:70725875:70725996:+@chr17:70732793:70732927:+@chr17:70733032:70733154:+	SE	0.0428377	NA	NA	0.69	0.61	0.68	0.77	0.71	NA	0.59	0.64	0.75	0.48	0.47	0.65	0.65	0.82	0.76	0.65	0.7	0.77	NA	0.61	0.71	0.37	NA	0.59	NA	0.59	0.63	0.2	0.57	NA	0.75
chr17:70725875:70725996:+@chr17:70732814:70732927:+@chr17:70733032:70733154:+	SE	0.0384532	NA	NA	0.64	0.67	0.58	0.74	0.61	NA	0.69	NA	0.75	0.39	0.56	0.56	0.48	0.69	0.67	0.55	0.49	0.71	NA	0.66	0.54	0.37	NA	0.52	NA	0.54	0.61	0.18	0.54	NA	0.58
chr17:70797030:70797638:-@chr17:70796178:70796267:-@chr17:70796064:70796137:-@chr17:70794309:70794478:-	MXE	0.0264692	NA	NA	NA	NA	0.55	0.67	0.68	NA	0.54	NA	0.45	0.37	0.62	NA	NA	0.67	0.33	NA	0.64	0.67	NA	0.37	NA	NA	NA	0.3	0.65	0.32	NA	0.3	NA	NA	0.44
chr17:7081428:7081520:-@chr17:7080609|7080810:7079973:-	A3SS	0.0403499	0.75	0.79	0.79	0.79	0.86	0.85	0.79	0.51	0.87	0.81	0.89	0.81	0.85	0.92	0.6	0.81	0.88	0.53	0.8	0.93	0.8	0.7	0.88	0.71	0.67	0.91	0.69	0.64	0.79	0.7	0.52	0.7	0.72
chr17:70913165:70913390:-@chr17:70901227:70901441:-@chr17:70840376:70840473:-	SE	0.0369119	0.79	0.69	0.87	0.79	0.92	0.96	0.94	0.88	0.91	0.88	0.96	0.93	0.75	0.91	0.89	0.83	0.93	0.74	0.82	0.91	0.74	0.75	0.91	0.76	0.61	0.89	0.92	0.77	0.94	0.75	0.76	0.63	0.75
chr17:7096008:7096124:-@chr17:7095455|7095644:7095238:-	A3SS	0.0382249	NA	NA	NA	NA	0.73	NA	0.7	0.9	NA	NA	0.87	NA	0.79	NA	NA	0.82	NA	NA	NA	NA	NA	0.67	0.71	0.7	NA	0.79	0.76	0.73	NA	0.55	0.68	NA	NA
chr17:70998979:70999143|70999131:+@chr17:70999367:71000012:+	A5SS	0.010057	NA	NA	NA	0.7	0.71	0.68	0.79	NA	0.76	0.84	0.88	0.82	NA	0.85	NA	0.77	0.75	NA	0.64	0.62	NA	0.8	0.68	NA	NA	0.65	0.71	0.58	0.64	0.41	NA	0.59	0.59
chr17:71001375:71001592:+@chr17:71002303|71002386:71002484:+	A3SS	0.000752362	NA	NA	NA	NA	0.52	0.66	0.83	0.7	0.72	0.63	0.82	0.75	NA	0.9	NA	0.69	0.79	NA	0.69	0.68	NA	0.48	0.58	NA	NA	0.53	0.58	0.39	0.46	NA	0.55	0.57	NA
chr17:71123988:71124460:+@chr17:71124549|71124560:71124636:+	A3SS	0.00836484	0.81	0.87	0.91	0.85	0.91	0.95	0.87	0.85	0.9	0.9	0.97	0.93	0.88	0.97	0.86	0.96	0.8	0.89	0.66	0.93	0.42	0.92	0.91	0.56	0.74	0.96	0.82	0.75	0.76	0.7	0.77	0.82	0.81
chr17:71351160:71352047:-@chr17:71350924|71350942:71350835:-	A3SS	0.0419967	NA	NA	NA	NA	0.71	0.86	NA	0.9	0.67	NA	0.69	NA	0.75	NA	NA	NA	NA	NA	NA	0.68	NA	0.67	0.74	NA	NA	0.59	0.55	0.58	NA	NA	NA	NA	NA
chr17:71355472:71356338:-@chr17:71355273|71355285:71355163:-	A3SS	0.0325784	NA	NA	NA	0.69	0.8	0.68	0.75	0.44	0.65	0.79	0.82	0.67	0.57	0.73	NA	0.58	0.54	NA	0.66	0.79	NA	0.45	0.7	0.65	NA	0.64	0.45	0.62	0.48	0.26	NA	0.75	0.47
chr17:7136069:7136102:-@chr17:7135575:7135822:-@chr17:7135136:7135225:-	SE	0.0124763	NA	NA	0.44	0.64	0.54	0.55	0.49	NA	0.66	NA	0.46	0.61	NA	0.61	0.5	NA	NA	NA	NA	NA	NA	0.49	0.42	NA	NA	0.4	0.37	NA	0.47	NA	NA	NA	0.48
chr17:71409696:71409962:-@chr17:71409592|71409596:71409388:-	A3SS	0.0478956	NA	NA	NA	0.63	0.91	0.87	0.77	0.68	0.77	0.94	0.97	0.89	0.83	0.83	NA	0.81	0.86	NA	0.84	0.91	NA	0.91	0.83	0.33	NA	0.9	0.77	0.81	0.68	0.71	0.62	0.71	0.71
chr17:71507817:71508065:+@chr17:71509088:71509217:+	RI	0.0176328	NA	0.51	0.65	0.75	0.68	0.69	0.64	0.54	0.69	0.74	0.74	0.74	0.74	0.72	0.54	0.68	0.75	NA	0.49	0.68	NA	0.84	0.76	NA	NA	0.82	0.71	0.77	0.72	0.76	NA	0.6	0.71
chr17:7151416:7151795:+@chr17:7153640|7153658:7153843:+	A3SS	0.00883644	0.45	0.72	0.55	0.52	0.79	0.69	0.7	0.54	0.41	0.49	0.74	0.53	0.54	0.69	0.85	0.7	0.38	0.31	0.51	0.36	0.76	0.73	0.74	0.56	0.81	0.68	0.91	0.68	0.57	0.7	0.54	0.82	0.75
chr17:7158123:7158202:-@chr17:7157949:7158031:-@chr17:7157611:7157764:-	SE	0.00835409	NA	NA	NA	0.61	0.74	0.72	0.78	NA	0.74	0.7	0.75	0.81	0.7	0.74	NA	0.7	0.77	NA	0.68	0.61	0.53	0.51	0.61	0.63	NA	0.71	NA	0.71	0.4	0.65	NA	NA	NA
chr17:71989052:71989386:-@chr17:71987410:71987531:-@chr17:71986483:71986954:-	SE	0.0153243	NA	NA	NA	0.78	0.82	NA	0.63	0.73	NA	0.59	0.72	NA	NA	NA	NA	0.53	0.62	NA	NA	0.69	NA	0.47	0.59	NA	NA	0.48	0.59	0.61	0.56	NA	NA	NA	NA
chr17:72068965:72069079|72069075:+@chr17:72070796:72073026:+	A5SS	0.035489	0.56	0.45	0.26	0.26	0.14	0.15	0.27	0.66	0.13	0.22	0.24	0.14	0.07	0.54	0.32	0.13	0.48	0.47	0.23	0.28	0.37	0.09	0.16	0.08	0.37	0.11	0.4	0.1	0.15	0.08	0.14	0.18	0.14
chr17:72185142:72185263:-@chr17:72183829:72185141:-	TandemUTR	0.00523956	NA	NA	0.46	0.37	0.41	0.49	0.48	0.47	0.41	0.47	0.55	0.38	0.52	0.48	NA	0.43	0.42	NA	NA	0.43	0.5	0.48	0.57	0.6	0.49	0.58	0.51	0.44	0.58	0.71	0.49	0.45	0.46
chr17:72240970:72241058|72241054:+@chr17:72241198:72241613:+	A5SS	0.0358782	0.37	0.31	0.31	0.29	0.3	0.35	0.23	NA	0.41	0.2	0.22	0.3	0.32	0.17	0.39	0.24	0.17	NA	0.53	0.2	0.56	0.28	0.42	0.33	NA	0.25	0.33	0.37	0.25	0.5	0.31	0.42	0.41
chr17:73636288:73636457:-@chr17:73634453:73634650:-@chr17:73634200:73634324:-	SE	0.0116972	NA	NA	0.65	0.55	0.83	0.62	0.7	0.73	0.37	0.68	0.58	0.72	0.6	0.64	0.63	0.55	0.76	NA	0.73	0.75	NA	0.63	0.49	0.58	NA	0.61	0.73	0.46	0.63	0.23	0.53	0.33	0.55
[truncated: 1,148 more rows]
